# Supplementary material
Source: publisher site journal article supplement (http://www.spandidos-publications.com/2764/downloadSupplementary)
Supplement: Supplementary file 1 [file downloadSupplementary]

## Sheet: ENCORI_hg19_CLIP-seq_miRNA-targ
Table SII. Potential circRNAs that could sponge miR-491.
miRNAid	miRNAname	geneID	geneName	geneType	chromosome	start	end	strand	clipExpNum	degraExpNum	RBP	merClass	miRseq	targetSeq
MIMAT0002807	hsa-miR-491-5p	NM_015658	NOC2L	circRNA	chr1	886606	886618	-	4	0	AGO1,AGO1-4,AGO2	7mer-m8	ggaguaccuucccaAGGGGUGa
MIMAT0002807	hsa-miR-491-5p	NM_198576	AGRN	circRNA	chr1	984281	984302	+	2	0	AGO1-4	7mer-m8	ggaguaccuucccAAGGGGUGa	cuccuuccuggccUUCCCCACu
MIMAT0002807	hsa-miR-491-5p	NM_030937	CCNL2	circRNA	chr1	1322888	1322908	-	2	0	AGO2	7mer-m8	ggaGUACCUUCCCAAGGGGUGa	gagCA-GGAGUGACUCCCCACc
MIMAT0002807	hsa-miR-491-5p	NM_030937	CCNL2	circRNA	chr1	1323403	1323424	-	1	2	AGO2	7mer-m8	ggaguaCCUUCCCAAGGGGUGa	aagggaGCAAGCCUUCCCCACu
MIMAT0002807	hsa-miR-491-5p	NM_031921	ATAD3B	circRNA	chr1	1450015	1450039	+	2	0	AGO1-4	7mer-m8	ggagUACCUU-CCCA--AGGGGUGa	cuaaAUGCAACGAGUGCUCCCCACg
MIMAT0002807	hsa-miR-491-5p	hsa_circ_0000003	hsa_circ_002058	circRNA	chr1	1450015	1450039	+	2	0	AGO1-4	7mer-m8	ggagUACCUU-CCCA--AGGGGUGa	cuaaAUGCAACGAGUGCUCCCCACg
MIMAT0002807	hsa-miR-491-5p	hsa_circ_0000004	hsa_circ_002098	circRNA	chr1	1450015	1450039	+	2	0	AGO1-4	7mer-m8	ggagUACCUU-CCCA--AGGGGUGa	cuaaAUGCAACGAGUGCUCCCCACg
MIMAT0002807	hsa-miR-491-5p	NM_018188	ATAD3A	circRNA	chr1	1459772	1459793	+	1	0	AGO1-4	8mer	ggaGUACCUUCCCAAGGGGUGa	gcgCGGGUGAGACGUCCCCACa
MIMAT0002807	hsa-miR-491-5p	hsa_circ_0000004	hsa_circ_002098	circRNA	chr1	1459772	1459793	+	1	0	AGO1-4	8mer	ggaGUACCUUCCCAAGGGGUGa	gcgCGGGUGAGACGUCCCCACa
MIMAT0002807	hsa-miR-491-5p	NM_014188	SSU72	circRNA	chr1	1477129	1477150	-	9	5	AGO1-4,AGO2	7mer-m8	ggaguaccuucccaAGGGGUGa	ccuucccucccuccUCCCCACc
MIMAT0002807	hsa-miR-491-5p	NM_001110781	SLC35E2B	circRNA	chr1	1596679	1596698	-	1	0	AGO1-4	7mer-m8	ggAGUACCUUCCCAAGGGGUGa	acUCA--GAACUUCUCCCCACc
MIMAT0002807	hsa-miR-491-5p	hsa_circ_0000005	hsa_circ_002136	circRNA	chr1	1596679	1596698	-	1	0	AGO1-4	7mer-m8	ggAGUACCUUCCCAAGGGGUGa	acUCA--GAACUUCUCCCCACc
MIMAT0002807	hsa-miR-491-5p	NM_003036	SKI	circRNA	chr1	2234792	2234815	+	10	1	AGO1-4	8mer	ggaguaCCUUC-CCA-AGGGGUGa	gagugaGAAAGAGCUCUCCCCACa
MIMAT0002807	hsa-miR-491-5p	NM_003036	SKI	circRNA	chr1	2238620	2238641	+	5	0	AGO1-4,AGO2	7mer-m8	ggaguaccuucccaAGGGGUGa	cggccgccccacccUCCCCACc
MIMAT0002807	hsa-miR-491-5p	NM_003036	SKI	circRNA	chr1	2238834	2238858	+	11	0	AGO1,AGO1-4,AGO2,AGO3	7mer-m8	ggAG-UACCUUC-CCA-AGGGGUGa	cgUCGAUGCCAGCGCUGUCCCCACg
MIMAT0002807	hsa-miR-491-5p	NM_003036	SKI	circRNA	chr1	2240359	2240381	+	5	0	AGO1-4,AGO2	7mer-m8	ggagUACCUUC-CCAAGGGGUGa	ugcaGUGGCAGCCCUUCCCCACu
MIMAT0002807	hsa-miR-491-5p	NM_182752	TPRG1L	circRNA	chr1	3546394	3546415	+	5	0	AGO1-4,AGO2	8mer	ggaGUACCUUCCCAAGGGGUGa	gugCCUGGAGGAUUUCCCCACa
MIMAT0002807	hsa-miR-491-5p	NM_001163724	LOC388588	circRNA	chr1	3691880	3691901	+	1	0	AGO1-4	7mer-m8	ggaguaccuucccaAGGGGUGa	caccugucuugaucUCCCCACc
MIMAT0002807	hsa-miR-491-5p	NM_020710	LRRC47	circRNA	chr1	3697669	3697690	-	5	0	AGO1-4	7mer-m8	ggaguaccuucccaAGGGGUGa	cuggccacugccccUCCCCACg
MIMAT0002807	hsa-miR-491-5p	NM_015102	NPHP4	circRNA	chr1	6046298	6046319	-	1	0	AGO1-4	7mer-m8	ggaguaccuucccaAGGGGUGa	aacgugcuugucccUCCCCACc
MIMAT0002807	hsa-miR-491-5p	NM_207370	GPR153	circRNA	chr1	6309377	6309398	-	3	0	AGO2	7mer-m8	ggaguaccuucccaAGGGGUGa	ggaccgccggcgccUCCCCACg
MIMAT0002807	hsa-miR-491-5p	NM_001042682	RERE	circRNA	chr1	8416253	8416274	-	2	0	AGO1-4	7mer-m8	ggaguaccuuccCAAGGGGUGa	ccccugacugccGGUCCCCACc
MIMAT0002807	hsa-miR-491-5p	NM_012102	RERE	circRNA	chr1	8416253	8416274	-	2	0	AGO1-4	7mer-m8	ggaguaccuuccCAAGGGGUGa	ccccugacugccGGUCCCCACc
MIMAT0002807	hsa-miR-491-5p	NM_001042682	RERE	circRNA	chr1	8420297	8420318	-	2	0	AGO1-4	7mer-m8	ggaguaccuucccaAGGGGUGa	gucguccugcccacUCCCCACc
MIMAT0002807	hsa-miR-491-5p	NM_012102	RERE	circRNA	chr1	8420297	8420318	-	2	0	AGO1-4	7mer-m8	ggaguaccuucccaAGGGGUGa	gucguccugcccacUCCCCACc
MIMAT0002807	hsa-miR-491-5p	NM_001042682	RERE	circRNA	chr1	8421175	8421196	-	3	0	AGO1-4	8mer	ggaguaccuuccCAAGGGGUGa	cccacagcgccuGUUCCCCACa
MIMAT0002807	hsa-miR-491-5p	NM_012102	RERE	circRNA	chr1	8421175	8421196	-	3	0	AGO1-4	8mer	ggaguaccuuccCAAGGGGUGa	cccacagcgccuGUUCCCCACa
MIMAT0002807	hsa-miR-491-5p	NM_012102	RERE	circRNA	chr1	8877572	8877593	-	1	0	AGO2	8mer	ggaguaccuuccCAAGGGGUGa	uuccccucucucGCUCCCCACa
MIMAT0002807	hsa-miR-491-5p	NM_001130924	TMEM201	circRNA	chr1	9667630	9667651	+	6	0	AGO1-4	7mer-m8	ggaguaccuucccAAGGGGUGa	cucugccggccuuUUCCCCACc
MIMAT0002807	hsa-miR-491-5p	NM_001009566	CLSTN1	circRNA	chr1	9795563	9795582	-	4	0	AGO1-4,AGO2	7mer-m8	ggAGUACCUUCCCAAGGGGUGa	acUCCCGGCA--GUUCCCCACg
MIMAT0002807	hsa-miR-491-5p	NM_001105562	UBE4B	circRNA	chr1	10205027	10205048	+	1	0	AGO1-4	7mer-m8	ggagUACCUUCCCAAGGGGUGa	gccaAUGGAAAGAUUCCCCACu
MIMAT0002807	hsa-miR-491-5p	NM_015074	KIF1B	circRNA	chr1	10439536	10439557	+	2	0	AGO1-4,AGO2	7mer-m8	ggaguaccuucccaAGGGGUGa	gcccgacagaaccaUCCCCACu
MIMAT0002807	hsa-miR-491-5p	NM_003132	SRM	circRNA	chr1	11115883	11115904	-	11	1	AGO1-4,AGO2	7mer-m8	ggaguaccuucccaAGGGGUGa	ugccuacugcaccaUCCCCACc
MIMAT0002807	hsa-miR-491-5p	NM_013319	UBIAD1	circRNA	chr1	11347068	11347089	+	1	0	AGO2	8mer	ggaguaccuuccCAAGGGGUGa	gcaucuucugauGCUCCCCACa
MIMAT0002807	hsa-miR-491-5p	NM_000302	PLOD1	circRNA	chr1	12034800	12034820	+	1	0	AGO1-4	7mer-m8	ggaGUACCUUCCCAAGGGGUGa	uacCAU-GAGGGGCUCCCCACc
MIMAT0002807	hsa-miR-491-5p	NM_014874	MFN2	circRNA	chr1	12049290	12049311	+	18	0	AGO1,AGO1-4,AGO2	7mer-m8	ggaguacCUUCCCAAGGGGUGa	cugagguGAAUGCAUCCCCACu
MIMAT0002807	hsa-miR-491-5p	NM_001243	TNFRSF8	circRNA	chr1	12203304	12203326	+	1	0	AGO2	7mer-m8	ggAGUACCUUCCCA-AGGGGUGa	acUCAUCUCAGAAUGUCCCCACc
MIMAT0002807	hsa-miR-491-5p	NM_001066	TNFRSF1B	circRNA	chr1	12268372	12268393	+	11	0	AGO1-4,AGO2	7mer-m8	ggaguaccuucccAAGGGGUGa	ggguggguuccucUUCCCCACu
MIMAT0002807	hsa-miR-491-5p	NM_001066	TNFRSF1B	circRNA	chr1	12268379	12268400	+	11	0	AGO1-4,AGO2	7mer-m8	ggaguaccuucccaAGGGGUGa	uuccucuuccccacUCCCCACc
MIMAT0002807	hsa-miR-491-5p	NM_012231	PRDM2	circRNA	chr1	14107173	14107194	+	2	0	AGO1-4	8mer	ggaguaccuuccCAAGGGGUGa	gccuccucucuuGAUCCCCACa
MIMAT0002807	hsa-miR-491-5p	NM_012231	PRDM2	circRNA	chr1	14107329	14107349	+	1	0	AGO2	7mer-m8	ggaGUACCUUCCCAAGGGGUGa	ugcCACCGCACAG-UCCCCACu
MIMAT0002807	hsa-miR-491-5p	NM_001229	CASP9	circRNA	chr1	15818325	15818346	-	1	0	AGO2	8mer	ggaGUACCUUCCCAAGGGGUGa	ugaCACGCUGGGCUUCCCCACa
MIMAT0002807	hsa-miR-491-5p	NM_015001	SPEN	circRNA	chr1	16265875	16265896	+	9	0	AGO1-4,AGO2	7mer-m8	ggaguaccuucccaAGGGGUGa	aucuccaacaucucUCCCCACc
MIMAT0002807	hsa-miR-491-5p	NM_014424	HSPB7	circRNA	chr1	16340868	16340888	-	4	0	AGO1-4	7mer-m8	ggaGUACCUUCCCAAGGGGUGa	ggcUAUGCAA-CCCUCCCCACg
MIMAT0002807	hsa-miR-491-5p	NM_014424	HSPB7	circRNA	chr1	16340931	16340952	-	2	0	AGO1-4	7mer-m8	ggaguaccuucccaAGGGGUGa	cugcugcucucaacUCCCCACc
MIMAT0002807	hsa-miR-491-5p	NM_004431	EPHA2	circRNA	chr1	16456876	16456897	-	2	0	AGO1-4,AGO2	8mer	ggaguaccuucCCAAGGGGUGa	ugauggcuuccGGCUCCCCACa
MIMAT0002807	hsa-miR-491-5p	NM_001114600	C1orf144	circRNA	chr1	16724218	16724240	+	4	0	AGO1-4	7mer-m8	ggAGUACCUUCC-CAAGGGGUGa	acUCAAUCAGGGUGCUCCCCACc
MIMAT0002807	hsa-miR-491-5p	NM_017940	NBPF1	circRNA	chr1	16933806	16933826	-	1	0	AGO1-4	7mer-m8	ggAGUACCUUCCCAAGGGGUGa	ggUGGUGUAA-GUUUCCCCACu
MIMAT0002807	hsa-miR-491-5p	NM_020765	UBR4	circRNA	chr1	19452977	19452998	-	5	1	AGO1-4,AGO2	7mer-m8	ggaguaccuucccaAGGGGUGa	cacauacuaccuccUCCCCACc
MIMAT0002807	hsa-miR-491-5p	NM_016183	MRTO4	circRNA	chr1	19585939	19585960	+	1	0	AGO2	7mer-m8	ggaGUACCUUCCCAAGGGGUGa	ccaCUUGCCUGUGGUCCCCACu
MIMAT0002807	hsa-miR-491-5p	NR_038125	CAPZB	circRNA	chr1	19671709	19671730	-	6	1	AGO1-4,AGO2	8mer	ggaguaCCUUCCCAAGGGGUGa	cugugaGUGACUGCUCCCCACa
MIMAT0002807	hsa-miR-491-5p	NM_015207	OTUD3	circRNA	chr1	20235615	20235636	+	1	0	AGO1-4	7mer-m8	ggaguaccuucccAAGGGGUGa	auuauuaguuaucUUCCCCACc
MIMAT0002807	hsa-miR-491-5p	NM_016287	HP1BP3	circRNA	chr1	21099981	21100005	-	2	0	AGO1,AGO1-4	7mer-m8	ggaGUACCUUCC---CAAGGGGUGa	aaaCACCGAUGGCUUCUUCCCCACg
MIMAT0002807	hsa-miR-491-5p	hsa_circ_0000023	hsa_circ_000809	circRNA	chr1	21099981	21100005	-	2	0	AGO1,AGO1-4	7mer-m8	ggaGUACCUUCC---CAAGGGGUGa	aaaCACCGAUGGCUUCUUCCCCACg
MIMAT0002807	hsa-miR-491-5p	hsa_circ_0000024	hsa_circ_001228	circRNA	chr1	21099981	21100005	-	2	0	AGO1,AGO1-4	7mer-m8	ggaGUACCUUCC---CAAGGGGUGa	aaaCACCGAUGGCUUCUUCCCCACg
MIMAT0002807	hsa-miR-491-5p	NM_001113347	ECE1	circRNA	chr1	21548285	21548306	-	2	0	AGO1,AGO2	7mer-m8	ggaguaccuuccCAAGGGGUGa	ggcugagcacucGCUCCCCACc
MIMAT0002807	hsa-miR-491-5p	hsa_circ_0000027	hsa_circ_000560	circRNA	chr1	21548285	21548306	-	2	0	AGO1,AGO2	7mer-m8	ggaguaccuuccCAAGGGGUGa	ggcugagcacucGCUCCCCACc
MIMAT0002807	hsa-miR-491-5p	NM_032236	USP48	circRNA	chr1	22032269	22032291	-	3	0	AGO1-4,AGO2	7mer-m8	ggaguaccuuccCA-AGGGGUGa	cagugcucuuuuGUGUCCCCACg
MIMAT0002807	hsa-miR-491-5p	NM_005529	HSPG2	circRNA	chr1	22149034	22149055	-	2	0	AGO1-4	7mer-m8	ggaguaccuucccaAGGGGUGa	caccccaggccacaUCCCCACc
MIMAT0002807	hsa-miR-491-5p	NM_005529	HSPG2	circRNA	chr1	22165998	22166019	-	2	0	AGO1-4	7mer-m8	ggaguaccuuCCCAAGGGGUGa	gguccaagcuGCGUUCCCCACu
MIMAT0002807	hsa-miR-491-5p	NM_005529	HSPG2	circRNA	chr1	22174315	22174333	-	2	0	AGO1-4	7mer-m8	ggaguaccuUCCCA-AGGGGUGa	#NAME?
MIMAT0002807	hsa-miR-491-5p	NM_005529	HSPG2	circRNA	chr1	22175183	22175204	-	3	0	AGO1-4	8mer	ggaguaccuucCCAAGGGGUGa	guugccagccaGGCUCCCCACa
MIMAT0002807	hsa-miR-491-5p	NM_005529	HSPG2	circRNA	chr1	22181109	22181130	-	2	0	AGO1-4	8mer	ggaguaccuucccaAGGGGUGa	ggggguagccugccUCCCCACa
MIMAT0002807	hsa-miR-491-5p	NM_005529	HSPG2	circRNA	chr1	22211556	22211580	-	4	0	AGO1-4	7mer-m8	ggaGUACC--U-UCCCAAGGGGUGa	cugCGUGGCCAUUGGCGUCCCCACc
MIMAT0002807	hsa-miR-491-5p	NM_001083621	ZBTB40	circRNA	chr1	22848895	22848916	+	2	0	AGO1-4,AGO2	7mer-m8	ggaGUACCUUCCCAAGGGGUGa	gugUAAGGAGCUCUUCCCCACg
MIMAT0002807	hsa-miR-491-5p	NM_033631	LUZP1	circRNA	chr1	23413304	23413325	-	4	0	AGO1-4,AGO2	7mer-m8	ggaguaccuucccaAGGGGUGa	cuuuccuguccacaUCCCCACc
MIMAT0002807	hsa-miR-491-5p	NM_007260	LYPLA2	circRNA	chr1	24121301	24121322	+	8	0	AGO1,AGO1-4,AGO2	7mer-m8	ggaguaccuucccaAGGGGUGa	cggucgagccccugUCCCCACc
MIMAT0002807	hsa-miR-491-5p	NM_007260	LYPLA2	circRNA	chr1	24121772	24121793	+	1	6	AGO1-4	8mer	ggaguaccuucCCAAGGGGUGa	uucccucagcuGUUUCCCCACa
MIMAT0002807	hsa-miR-491-5p	NM_007260	LYPLA2	circRNA	chr1	24121889	24121910	+	1	5	AGO2	7mer-m8	ggaguaccuucccaAGGGGUGa	ucacccccacuuugUCCCCACu
MIMAT0002807	hsa-miR-491-5p	NM_005839	SRRM1	circRNA	chr1	24998750	24998770	+	1	0	AGO1-4	8mer	ggaguaccUUCCCAAGGGGUGa	gaaggcccAAGUG-UCCCCACa
MIMAT0002807	hsa-miR-491-5p	NM_014313	TMEM50A	circRNA	chr1	25688107	25688128	+	2	0	AGO1-4	7mer-m8	ggaguaccuucCCAAGGGGUGa	uuguccccccaGGCUCCCCACc
MIMAT0002807	hsa-miR-491-5p	NM_014313	TMEM50A	circRNA	chr1	25688523	25688544	+	11	0	AGO1,AGO2	8mer	ggaguaccuucccAAGGGGUGa	gagcacaaccucuUUCCCCACa
MIMAT0002807	hsa-miR-491-5p	NM_020451	SEPN1	circRNA	chr1	26143534	26143555	+	5	0	AGO1-4,AGO2	7mer-m8	ggaguaccuucccaAGGGGUGa	agcccccaguucucUCCCCACc
MIMAT0002807	hsa-miR-491-5p	NM_001202554	PIGV	circRNA	chr1	27120945	27120964	+	1	0	AGO1-4	7mer-m8	ggAGUACCUUCCCAAGGGGUGa	ggUUUUGCACUG--UCCCCACc
MIMAT0002807	hsa-miR-491-5p	NM_052943	FAM46B	circRNA	chr1	27338928	27338954	-	1	0	AGO2	7mer-m8	ggAGUACCUUC-CC----AAGGGGUGa	auUCACGGGCGCGGCAACUUCCCCACg
MIMAT0002807	hsa-miR-491-5p	NM_031459	SESN2	circRNA	chr1	28607330	28607351	+	10	0	AGO1,AGO1-4,AGO2	8mer	ggaguaccuuccCAAGGGGUGa	gggcccgguucaGCUCCCCACa
MIMAT0002807	hsa-miR-491-5p	NM_031459	SESN2	circRNA	chr1	28607392	28607413	+	7	0	AGO1-4,AGO2	7mer-m8	ggaguaccuucccaAGGGGUGa	ucccaugcccacccUCCCCACg
MIMAT0002807	hsa-miR-491-5p	NM_031459	SESN2	circRNA	chr1	28608364	28608390	+	5	1	AGO1-4,AGO2	8mer	ggaguaCCUUCCCA-----AGGGGUGa	cugagaGGGUGGGUCUGAGUCCCCACa
MIMAT0002807	hsa-miR-491-5p	NM_001048183	PHACTR4	circRNA	chr1	28800099	28800120	+	3	1	AGO1-4,AGO2	7mer-m8	ggAGUACCUUCCCAAGGGGUGa	ugUUAUCAAAACCGUCCCCACc
MIMAT0002807	hsa-miR-491-5p	hsa_circ_0000038	hsa_circ_000570	circRNA	chr1	28800099	28800120	+	3	1	AGO1-4,AGO2	7mer-m8	ggAGUACCUUCCCAAGGGGUGa	ugUUAUCAAAACCGUCCCCACc
MIMAT0002807	hsa-miR-491-5p	NM_001166005	EPB41	circRNA	chr1	29391637	29391661	+	1	0	AGO2	8mer	ggaGUACCUUCCC---AAGGGGUGa	uaaCAUCAAUGGGCAAAUCCCCACa
MIMAT0002807	hsa-miR-491-5p	NM_001166006	EPB41	circRNA	chr1	29391637	29391661	+	1	0	AGO2	8mer	ggaGUACCUUCCC---AAGGGGUGa	uaaCAUCAAUGGGCAAAUCCCCACa
MIMAT0002807	hsa-miR-491-5p	NM_001020658	PUM1	circRNA	chr1	31405613	31405634	-	3	1	AGO1-4,AGO2	7mer-m8	ggaguaccuucccAAGGGGUGa	uugcaaauagcucUUCCCCACc
MIMAT0002807	hsa-miR-491-5p	NM_001020658	PUM1	circRNA	chr1	31409591	31409613	-	7	0	AGO1,AGO1-4,AGO2	8mer	ggaGUACCUUC-CCAAGGGGUGa	cacCAUGAACGACGGUCCCCACa
MIMAT0002807	hsa-miR-491-5p	NM_001020658	PUM1	circRNA	chr1	31478788	31478807	-	1	0	AGO2	7mer-m8	ggAGUACCUUCCCAAGGGGUGa	aaUUCUGUACUG--UCCCCACg
MIMAT0002807	hsa-miR-491-5p	hsa_circ_0000044	hsa_circ_000829	circRNA	chr1	31478788	31478807	-	1	0	AGO2	7mer-m8	ggAGUACCUUCCCAAGGGGUGa	aaUUCUGUACUG--UCCCCACg
MIMAT0002807	hsa-miR-491-5p	NM_001199037	SERINC2	circRNA	chr1	31907109	31907130	+	1	0	AGO1-4	8mer	ggaguaccuucccaAGGGGUGa	gccaaccugcccccUCCCCACa
MIMAT0002807	hsa-miR-491-5p	NM_001199038	SERINC2	circRNA	chr1	31907109	31907130	+	1	0	AGO1-4	8mer	ggaguaccuucccaAGGGGUGa	gccaaccugcccccUCCCCACa
MIMAT0002807	hsa-miR-491-5p	NM_001199039	SERINC2	circRNA	chr1	31907109	31907130	+	1	0	AGO1-4	8mer	ggaguaccuucccaAGGGGUGa	gccaaccugcccccUCCCCACa
MIMAT0002807	hsa-miR-491-5p	NM_178865	SERINC2	circRNA	chr1	31907109	31907130	+	1	0	AGO1-4	8mer	ggaguaccuucccaAGGGGUGa	gccaaccugcccccUCCCCACa
MIMAT0002807	hsa-miR-491-5p	NM_144569	SPOCD1	circRNA	chr1	32256416	32256438	-	1	0	AGO1-4	7mer-m8	ggaGUACCUUCCCA-AGGGGUGa	ccaCAGGGACUCCUGUCCCCACc
MIMAT0002807	hsa-miR-491-5p	NM_006559	KHDRBS1	circRNA	chr1	32508346	32508367	+	9	0	AGO1,AGO1-4,AGO2	7mer-m8	ggaguaccuucccaAGGGGUGa	ugguccccuucuucUCCCCACc
MIMAT0002807	hsa-miR-491-5p	NM_006559	KHDRBS1	circRNA	chr1	32526137	32526158	+	1	0	AGO2	7mer-m8	ggaguaccuucCCAAGGGGUGa	caccguuuucuGUUUCCCCACu
MIMAT0002807	hsa-miR-491-5p	NM_012316	KPNA6	circRNA	chr1	32636565	32636585	+	2	0	AGO1-4,AGO2	7mer-m8	ggaguaccuUCCCAAGGGGUGa	cgggaaaccAGUG-UCCCCACc
MIMAT0002807	hsa-miR-491-5p	NM_012316	KPNA6	circRNA	chr1	32638349	32638370	+	1	1	AGO1-4	7mer-m8	ggaguaccuucccaAGGGGUGa	gccccacccccaccUCCCCACu
MIMAT0002807	hsa-miR-491-5p	NM_023009	MARCKSL1	circRNA	chr1	32799910	32799931	-	15	1	AGO1,AGO1-4,AGO2	7mer-m8	ggaguaccuucccaAGGGGUGa	uaccuccuucccugUCCCCACc
MIMAT0002807	hsa-miR-491-5p	NM_001145720	ZBTB8B	circRNA	chr1	33041942	33041963	+	1	0	AGO2	7mer-m8	ggaguaccuucccaAGGGGUGa	aaauguuuuuucugUCCCCACc
MIMAT0002807	hsa-miR-491-5p	NM_152493	ZNF362	circRNA	chr1	33764897	33764918	+	2	0	AGO1-4	7mer-m8	ggaguaccuuccCAAGGGGUGa	aguuuucuuuuuGUUCCCCACc
MIMAT0002807	hsa-miR-491-5p	NM_005095	ZMYM4	circRNA	chr1	35852663	35852684	+	9	0	AGO1-4,AGO2	8mer	ggAGUACCUUCCCAAGGGGUGa	agUAAUUGUAAGCAUCCCCACa
MIMAT0002807	hsa-miR-491-5p	hsa_circ_0000051	hsa_circ_000837	circRNA	chr1	35852663	35852684	+	9	0	AGO1-4,AGO2	8mer	ggAGUACCUUCCCAAGGGGUGa	agUAAUUGUAAGCAUCCCCACa
MIMAT0002807	hsa-miR-491-5p	NM_012199	EIF2C1	circRNA	chr1	36389679	36389700	+	4	0	AGO1-4,AGO2	8mer	ggaguaccuucCCAAGGGGUGa	gaaaugucucuGGAUCCCCACa
MIMAT0002807	hsa-miR-491-5p	NM_005119	THRAP3	circRNA	chr1	36711429	36711450	+	1	0	AGO1-4	8mer	ggaguaccuucccaAGGGGUGa	uuuucgcuacuuccUCCCCACa
MIMAT0002807	hsa-miR-491-5p	NM_032017	STK40	circRNA	chr1	36806976	36806999	-	9	0	AGO1-4,AGO2	8mer	ggaGUACCUUCC--CAAGGGGUGa	ugaCCUGGGGCGCUGCUCCCCACa
MIMAT0002807	hsa-miR-491-5p	NM_004468	FHL3	circRNA	chr1	38462853	38462874	-	1	3	AGO2	8mer	ggaguaccuucccaAGGGGUGa	ugagucaagcccccUCCCCACa
MIMAT0002807	hsa-miR-491-5p	NM_000310	PPT1	circRNA	chr1	40538621	40538645	-	8	0	AGO1,AGO1-4,AGO2	7mer-m8	ggaGUACC-UUCCCA--AGGGGUGa	gagCAUGGAAAUCAUAGUCCCCACu
MIMAT0002807	hsa-miR-491-5p	NM_022733	SMAP2	circRNA	chr1	40888798	40888819	+	2	0	AGO1-4,AGO2	7mer-m8	ggaguaccuucCCAAGGGGUGa	cagggugcucuGUUUCCCCACc
MIMAT0002807	hsa-miR-491-5p	NM_001905	CTPS	circRNA	chr1	41475165	41475186	+	5	0	AGO1,AGO1-4	7mer-m8	ggaguaccUUCCCAAGGGGUGa	ggccuaucAAGCCCUCCCCACc
MIMAT0002807	hsa-miR-491-5p	NM_001198851	FOXJ3	circRNA	chr1	42657129	42657151	-	2	1	AGO2	8mer	ggaGUA-CCUUCCCAAGGGGUGa	cagCAUCCGCAGCGUUCCCCACa
MIMAT0002807	hsa-miR-491-5p	NM_022821	ELOVL1	circRNA	chr1	43829443	43829464	-	2	0	AGO1,AGO1-4	8mer	ggaguaccuucccaAGGGGUGa	gacuggcccuccccUCCCCACa
MIMAT0002807	hsa-miR-491-5p	NM_014652	IPO13	circRNA	chr1	44415148	44415174	+	1	0	AGO2	8mer	ggAGUACCUUC----CCA-AGGGGUGa	gcUGAUGCAGGCCCAGGUCUCCCCACa
MIMAT0002807	hsa-miR-491-5p	NM_014652	IPO13	circRNA	chr1	44415267	44415289	+	2	0	AGO1,AGO2	7mer-m8	ggaguACCUU-CCCAAGGGGUGa	gcuacUGGAGUGACAUCCCCACu
MIMAT0002807	hsa-miR-491-5p	NM_018150	RNF220	circRNA	chr1	44878202	44878226	+	1	0	AGO2	7mer-m8	ggaGUAC-CU-UCCCA-AGGGGUGa	ugcCAUGACACAGAGUCUCCCCACu
MIMAT0002807	hsa-miR-491-5p	NM_199044	NSUN4	circRNA	chr1	46807889	46807910	+	1	0	AGO2	7mer-m8	ggaguaccuucccAAGGGGUGa	ucuccccagcaucUUCCCCACc
MIMAT0002807	hsa-miR-491-5p	NM_199044	NSUN4	circRNA	chr1	46808668	46808691	+	2	0	AGO2	7mer-m8	ggaguaccUUCCCA--AGGGGUGa	gcucucaaAAGUGUUAUCCCCACu
MIMAT0002807	hsa-miR-491-5p	NM_014774	KIAA0494	circRNA	chr1	47184244	47184265	-	11	0	AGO1,AGO1-4,AGO2	7mer-m8	ggaguaccuucccaAGGGGUGa	ucuuacucugcaccUCCCCACu
MIMAT0002807	hsa-miR-491-5p	NM_014372	RNF11	circRNA	chr1	51737362	51737383	+	9	0	AGO1,AGO1-4,AGO2	7mer-m8	ggaguaccuucccAAGGGGUGa	ucuucucuuccccUUCCCCACc
MIMAT0002807	hsa-miR-491-5p	NM_001009881	ZCCHC11	circRNA	chr1	52940552	52940573	-	3	0	AGO1,AGO2	7mer-m8	ggaguaccuucccaAGGGGUGa	ugaugaugauaaccUCCCCACc
MIMAT0002807	hsa-miR-491-5p	NM_018087	TMEM48	circRNA	chr1	54232777	54232798	-	1	0	AGO2	7mer-m8	ggaguaccuucccAAGGGGUGa	aauguucccuuuuUUCCCCACc
MIMAT0002807	hsa-miR-491-5p	NM_018087	TMEM48	circRNA	chr1	54266507	54266521	-	1	0	AGO1-4	8mer	ggaguaccuucccaAGGGGUGa	#NAME?
MIMAT0002807	hsa-miR-491-5p	NM_014762	DHCR24	circRNA	chr1	55316829	55316850	-	7	1	AGO1-4,AGO2	7mer-m8	ggaguaccuucccaAGGGGUGa	cuuucuuccaccacUCCCCACc
MIMAT0002807	hsa-miR-491-5p	NM_014762	DHCR24	circRNA	chr1	55317353	55317376	-	2	0	AGO1-4,AGO2	7mer-m8	ggagUACCU-UC-CCAAGGGGUGa	ggagAAGGACAGCUCUUCCCCACc
MIMAT0002807	hsa-miR-491-5p	NM_002227	JAK1	circRNA	chr1	65400699	65400720	-	1	0	AGO2	8mer	ggAGUACCUUCCCAAGGGGUGa	agUAGUGGUGCAUAUCCCCACa
MIMAT0002807	hsa-miR-491-5p	NM_002227	JAK1	circRNA	chr1	65421467	65421488	-	1	0	AGO1-4	7mer-m8	ggaguaccuucccaAGGGGUGa	uuugccacucgcugUCCCCACu
MIMAT0002807	hsa-miR-491-5p	NM_001005353	AK4	circRNA	chr1	65692211	65692232	+	1	0	AGO1-4	8mer	ggaguaccuucccaAGGGGUGa	ucugguucuccccaUCCCCACa
MIMAT0002807	hsa-miR-491-5p	NM_013410	AK4	circRNA	chr1	65692211	65692232	+	1	0	AGO1-4	8mer	ggaguaccuucccaAGGGGUGa	ucugguucuccccaUCCCCACa
MIMAT0002807	hsa-miR-491-5p	NM_005455	ZRANB2	circRNA	chr1	71532579	71532600	-	1	0	AGO1-4	7mer-m8	ggaguaccuucccAAGGGGUGa	acaggggcucuucUUCCCCACg
MIMAT0002807	hsa-miR-491-5p	NM_012302	LPHN2	circRNA	chr1	82450319	82450339	+	2	0	AGO2	8mer	ggaGUACCUUCCCAAGGGGUGa	uccCAACUGAGAG-UCCCCACa
MIMAT0002807	hsa-miR-491-5p	NM_006256	PKN2	circRNA	chr1	89140747	89140772	-	1	0	AGO1-4	7mer-m8	ggAGUACC-UUCCC---AAGGGGUGa	caUCAUGGAAAGAGACAAUCCCCACu
MIMAT0002807	hsa-miR-491-5p	NM_006256	PKN2	circRNA	chr1	89140822	89140843	-	1	0	AGO1-4	7mer-m8	ggaguaccuucccaAGGGGUGa	cucagcccuuccagUCCCCACc
MIMAT0002807	hsa-miR-491-5p	NM_201269	ZNF644	circRNA	chr1	91381988	91382009	-	9	0	AGO1,AGO1-4,AGO2	8mer	ggaguaccuucccAAGGGGUGa	aaggcucuguuuaUUCCCCACa
MIMAT0002807	hsa-miR-491-5p	NR_036634	TGFBR3	circRNA	chr1	92224231	92224252	-	1	0	AGO2	8mer	ggaguaccuucccaAGGGGUGa	uguuccugcucaacUCCCCACa
MIMAT0002807	hsa-miR-491-5p	NM_001024948	FNBP1L	circRNA	chr1	94018571	94018592	+	3	0	AGO1-4,AGO2	7mer-m8	ggaguaccuucccAAGGGGUGa	acacugcuauaacUUCCCCACu
MIMAT0002807	hsa-miR-491-5p	NM_003567	BCAR3	circRNA	chr1	94140248	94140269	-	1	0	AGO2	7mer-m8	ggaguaccuucccaAGGGGUGa	ucccccacuccaaaUCCCCACg
MIMAT0002807	hsa-miR-491-5p	NM_000110	DPYD	circRNA	chr1	98039474	98039495	-	1	0	AGO2	7mer-m8	ggaguaccuucccaAGGGGUGa	uucugccauuccugUCCCCACg
MIMAT0002807	hsa-miR-491-5p	NM_001010883	FAM102B	circRNA	chr1	109178761	109178782	+	4	0	AGO1-4,AGO2	7mer-m8	ggaguaccuucccAAGGGGUGa	agguacuguuuucUUCCCCACu
MIMAT0002807	hsa-miR-491-5p	NM_001408	CELSR2	circRNA	chr1	109817941	109817962	+	4	0	AGO1-4	7mer-m8	ggaguaccuucccaAGGGGUGa	cccaggccaucaucUCCCCACc
MIMAT0002807	hsa-miR-491-5p	NM_001199773	PSMA5	circRNA	chr1	109957909	109957930	-	17	0	AGO1-4,AGO2	7mer-m8	ggaguaccuucccAAGGGGUGa	agaagagaauuacUUCCCCACu
MIMAT0002807	hsa-miR-491-5p	NM_002790	PSMA5	circRNA	chr1	109957909	109957930	-	17	0	AGO1-4,AGO2	7mer-m8	ggaguaccuucccAAGGGGUGa	agaagagaauuacUUCCCCACu
MIMAT0002807	hsa-miR-491-5p	NM_001242673	AHCYL1	circRNA	chr1	110551682	110551703	+	6	0	AGO1-4,AGO2	7mer-m8	ggaguaccuucccAAGGGGUGa	ggaguucaccaaaUUCCCCACc
MIMAT0002807	hsa-miR-491-5p	NM_020963	MOV10	circRNA	chr1	113239323	113239345	+	1	0	AGO1-4	7mer-m8	ggaGUAC-CUUCCCAAGGGGUGa	gggCCUGUGCUGCGUUCCCCACu
MIMAT0002807	hsa-miR-491-5p	NM_018364	RSBN1	circRNA	chr1	114307353	114307376	-	2	0	AGO2	8mer	ggAGUACCUUCCCA--AGGGGUGa	auUAAUGGAAGAGUACUCCCCACa
MIMAT0002807	hsa-miR-491-5p	NM_006594	AP4B1	circRNA	chr1	114442835	114442860	-	1	0	AGO1-4	7mer-m8	ggAGUACC----UUCCCAAGGGGUGa	gaUCUUGGCAAAAAUGUUUCCCCACg
MIMAT0002807	hsa-miR-491-5p	hsa_circ_0000112	hsa_circ_000789	circRNA	chr1	114442835	114442860	-	1	0	AGO1-4	7mer-m8	ggAGUACC----UUCCCAAGGGGUGa	gaUCUUGGCAAAAAUGUUUCCCCACg
MIMAT0002807	hsa-miR-491-5p	NM_020190	OLFML3	circRNA	chr1	114524430	114524451	+	1	0	AGO2	7mer-m8	ggaguaccuucccaAGGGGUGa	acauuuauauuauaUCCCCACu
MIMAT0002807	hsa-miR-491-5p	NM_198459	DENND2C	circRNA	chr1	115107336	115107357	-	1	0	AGO1-4	7mer-m8	ggaguaccuucccAAGGGGUGa	ucugaccguguucUUCCCCACc
MIMAT0002807	hsa-miR-491-5p	NM_020440	PTGFRN	circRNA	chr1	117484350	117484371	+	1	0	AGO1-4	8mer	ggaGUACC-UUCCCAAGGGGUGa	gcgUGUGGUGAGAG-UCCCCACa
MIMAT0002807	hsa-miR-491-5p	NM_020440	PTGFRN	circRNA	chr1	117531352	117531372	+	1	0	AGO1-4	7mer-m8	ggaGUACCUUCCCAAGGGGUGa	uccCAUUG-AGUUUUCCCCACc
MIMAT0002807	hsa-miR-491-5p	NM_017686	GDAP2	circRNA	chr1	118411798	118411819	-	3	0	AGO1-4	8mer	ggaguaccuucccaAGGGGUGa	uuccuacagccaccUCCCCACa
MIMAT0002807	hsa-miR-491-5p	NM_006623	PHGDH	circRNA	chr1	120279775	120279794	+	4	0	AGO1,AGO1-4,AGO2	7mer-m8	ggAGUACCUUCCCAAGGGGUGa	ugUCAU--CAGCUGUCCCCACc
MIMAT0002807	hsa-miR-491-5p	NM_024408	NOTCH2	circRNA	chr1	120468030	120468051	-	2	0	AGO1-4,AGO2	7mer-m8	ggaguaccuucccaAGGGGUGa	gggccaacugcuccUCCCCACu
MIMAT0002807	hsa-miR-491-5p	TCONS_l2_00000554	TCONS_l2_00000554	circRNA	chr1	142671679	142671702	+	1	0	AGO1-4	7mer-m8	ggaguaCCUUCCC--AAGGGGUGa	aagugaGGACGGGGCCUCCCCACu
MIMAT0002807	hsa-miR-491-5p	TCONS_00001137	TCONS_00001137	circRNA	chr1	143173835	143173856	+	1	0	AGO1-4	7mer-m8	ggaguaccuucccaAGGGGUGa	aucgcccccaacccUCCCCACc
MIMAT0002807	hsa-miR-491-5p	TCONS_l2_00000554	TCONS_l2_00000554	circRNA	chr1	143173835	143173856	+	1	0	AGO1-4	7mer-m8	ggaguaccuucccaAGGGGUGa	aucgcccccaacccUCCCCACc
MIMAT0002807	hsa-miR-491-5p	TCONS_00001137	TCONS_00001137	circRNA	chr1	143173861	143173882	+	1	0	AGO1-4	7mer-m8	ggaguaccuucccaAGGGGUGa	aauccccccaacccUCCCCACc
MIMAT0002807	hsa-miR-491-5p	TCONS_l2_00000554	TCONS_l2_00000554	circRNA	chr1	143173861	143173882	+	1	0	AGO1-4	7mer-m8	ggaguaccuucccaAGGGGUGa	aauccccccaacccUCCCCACc
MIMAT0002807	hsa-miR-491-5p	NM_001037675	NBPF9	circRNA	chr1	144993205	144993226	+	1	0	AGO2	7mer-m8	ggaguaccuucccAAGGGGUGa	caguaggucuuccUUCCCCACc
MIMAT0002807	hsa-miR-491-5p	NM_001039703	NBPF10	circRNA	chr1	144993205	144993226	+	1	0	AGO2	7mer-m8	ggaguaccuucccAAGGGGUGa	caguaggucuuccUUCCCCACc
MIMAT0002807	hsa-miR-491-5p	NM_001039703	NBPF10	circRNA	chr1	145499237	145499258	+	1	0	AGO1	7mer-m8	ggaguaccuucccaAGGGGUGa	ugcuaucccuuuccUCCCCACc
MIMAT0002807	hsa-miR-491-5p	NM_005399	PRKAB2	circRNA	chr1	146634074	146634095	-	5	0	AGO2	7mer-m8	ggaguaccuucccaAGGGGUGa	aggaaagauucaaaUCCCCACc
MIMAT0002807	hsa-miR-491-5p	NM_001097616	GPR89C	circRNA	chr1	146731685	146731705	+	2	0	AGO1-4	8mer	ggaGUACCUUCCCAAGGGGUGa	uccCAUGCAUAUG-UCCCCACa
MIMAT0002807	hsa-miR-491-5p	NM_004326	BCL9	circRNA	chr1	146731685	146731705	+	2	0	AGO1-4	8mer	ggaGUACCUUCCCAAGGGGUGa	uccCAUGCAUAUG-UCCCCACa
MIMAT0002807	hsa-miR-491-5p	NM_001097616	GPR89C	circRNA	chr1	146731711	146731732	+	2	0	AGO1-4	8mer	ggaguaccuucccaAGGGGUGa	acagcuguccccugUCCCCACa
MIMAT0002807	hsa-miR-491-5p	NM_004326	BCL9	circRNA	chr1	146731711	146731732	+	2	0	AGO1-4	8mer	ggaguaccuucccaAGGGGUGa	acagcuguccccugUCCCCACa
MIMAT0002807	hsa-miR-491-5p	NM_001097616	GPR89C	circRNA	chr1	146872227	146872248	+	1	0	AGO1-4	7mer-m8	ggaguaccuucccaAGGGGUGa	ggggauaucuauucUCCCCACu
MIMAT0002807	hsa-miR-491-5p	NM_004326	BCL9	circRNA	chr1	146872227	146872248	+	1	0	AGO1-4	7mer-m8	ggaguaccuucccaAGGGGUGa	ggggauaucuauucUCCCCACu
MIMAT0002807	hsa-miR-491-5p	NM_001097616	GPR89C	circRNA	chr1	147063091	147063112	+	1	0	AGO2	7mer-m8	ggaguaccuucccAAGGGGUGa	uuaucuaucuguaUUCCCCACu
MIMAT0002807	hsa-miR-491-5p	NM_001097616	GPR89C	circRNA	chr1	147091597	147091618	+	1	0	AGO1-4	7mer-m8	ggaguaCCUUCCCAAGGGGUGa	ccgaggGGCAUGGCUCCCCACc
MIMAT0002807	hsa-miR-491-5p	NM_004326	BCL9	circRNA	chr1	147091597	147091618	+	1	0	AGO1-4	7mer-m8	ggaguaCCUUCCCAAGGGGUGa	ccgaggGGCAUGGCUCCCCACc
MIMAT0002807	hsa-miR-491-5p	NM_001097616	GPR89C	circRNA	chr1	147404115	147404136	+	1	0	AGO1-4	7mer-m8	ggaguaccuucccaAGGGGUGa	uucuuccauuccccUCCCCACc
MIMAT0002807	hsa-miR-491-5p	NM_004326	BCL9	circRNA	chr1	147404115	147404136	+	1	0	AGO1-4	7mer-m8	ggaguaccuucccaAGGGGUGa	uucuuccauuccccUCCCCACc
MIMAT0002807	hsa-miR-491-5p	NM_015203	RPRD2	circRNA	chr1	150390072	150390086	+	4	0	AGO1-4,AGO2	7mer-m8	ggaguaccuucccaAGGGGUGa	#NAME?
MIMAT0002807	hsa-miR-491-5p	NM_021960	MCL1	circRNA	chr1	150548186	150548207	-	23	0	AGO1,AGO1-4,AGO2	7mer-m8	ggaguaccuucccaAGGGGUGa	ugagugacccucccUCCCCACc
MIMAT0002807	hsa-miR-491-5p	NM_001136543	LYSMD1	circRNA	chr1	151132846	151132867	-	2	0	AGO1-4	7mer-m8	ggaguaccuucccAAGGGGUGa	cugguucuccacuUUCCCCACc
MIMAT0002807	hsa-miR-491-5p	NM_001136543	LYSMD1	circRNA	chr1	151134337	151134360	-	2	0	AGO1-4	8mer	ggagUAC--CUUCCCAAGGGGUGa	gccaAUGGUGAAGUCCUCCCCACa
MIMAT0002807	hsa-miR-491-5p	NM_212551	LYSMD1	circRNA	chr1	151134337	151134360	-	2	0	AGO1-4	8mer	ggagUAC--CUUCCCAAGGGGUGa	gccaAUGGUGAAGUCCUCCCCACa
MIMAT0002807	hsa-miR-491-5p	NM_001204856	SCNM1	circRNA	chr1	151139841	151139862	+	10	0	AGO1,AGO1-4,AGO2,AGO3	7mer-m8	ggAGUACCU-UCCCAAGGGGUGa	gcUC-UGCACAGAGCUCCCCACu
MIMAT0002807	hsa-miR-491-5p	hsa_circ_0000128	hsa_circ_000060	circRNA	chr1	151139841	151139862	+	10	0	AGO1,AGO1-4,AGO2,AGO3	7mer-m8	ggAGUACCU-UCCCAAGGGGUGa	gcUC-UGCACAGAGCUCCCCACu
MIMAT0002807	hsa-miR-491-5p	NM_015100	POGZ	circRNA	chr1	151378868	151378889	-	13	0	AGO1-4,AGO2	7mer-m8	ggaguaccuucccAAGGGGUGa	cccuccuccuuccUUCCCCACu
MIMAT0002807	hsa-miR-491-5p	NM_030918	SNX27	circRNA	chr1	151664944	151664965	+	6	0	AGO1-4,AGO2	7mer-m8	ggaguaccuucccAAGGGGUGa	aaugaaaucaucuUUCCCCACu
MIMAT0002807	hsa-miR-491-5p	NM_053055	THEM4	circRNA	chr1	151863027	151863048	-	2	0	AGO1-4,AGO2	7mer-m8	ggaguaccuucccaAGGGGUGa	ccuuccugucccucUCCCCACu
MIMAT0002807	hsa-miR-491-5p	NM_014856	DENND4B	circRNA	chr1	153913872	153913893	-	2	0	AGO1-4,AGO2	8mer	ggaguaccuucccAAGGGGUGa	acguucccuucccUUCCCCACa
MIMAT0002807	hsa-miR-491-5p	NM_181715	CRTC2	circRNA	chr1	153927368	153927390	-	1	0	AGO1-4	7mer-m8	ggAGUACCUUCCCA-AGGGGUGa	ccUCGAAGAAUGGUGUCCCCACu
MIMAT0002807	hsa-miR-491-5p	NM_002870	RAB13	circRNA	chr1	153954552	153954573	-	2	0	AGO1-4,AGO2	7mer-m8	ggaguaccuucccaAGGGGUGa	gacccuuucuugccUCCCCACc
MIMAT0002807	hsa-miR-491-5p	NM_002870	RAB13	circRNA	chr1	153958740	153958762	-	7	0	AGO1-4,AGO2	7mer-m8	ggagUACCUUCC-CAAGGGGUGa	accaGUGCCGGGCGCUCCCCACc
MIMAT0002807	hsa-miR-491-5p	NM_014847	UBAP2L	circRNA	chr1	154242922	154242943	+	3	1	AGO1-4,AGO2	7mer-m8	ggaguaccuucccaAGGGGUGa	ccauuccuauaccaUCCCCACc
MIMAT0002807	hsa-miR-491-5p	NM_001130040	SHC1	circRNA	chr1	154935336	154935357	-	16	0	AGO1-4,AGO2	8mer	ggaguaccuucccaAGGGGUGa	aaagcaguagacaaUCCCCACa
MIMAT0002807	hsa-miR-491-5p	NM_183001	SHC1	circRNA	chr1	154935336	154935357	-	16	0	AGO1-4,AGO2	8mer	ggaguaccuucccaAGGGGUGa	aaagcaguagacaaUCCCCACa
MIMAT0002807	hsa-miR-491-5p	NM_006589	FAM189B	circRNA	chr1	155220126	155220145	-	5	0	AGO1-4,AGO2	7mer-m8	ggAGUACCUUCCCAAGGGGUGa	ccUCAU--CCGGCAUCCCCACc
MIMAT0002807	hsa-miR-491-5p	NM_001105203	RUSC1	circRNA	chr1	155300743	155300763	+	16	0	AGO1-4,AGO2	7mer-m8	ggaGUACCUUCCCAAGGGGUGa	cugUGUGGAA-UCUUCCCCACu
MIMAT0002807	hsa-miR-491-5p	NM_018489	ASH1L	circRNA	chr1	155313234	155313255	-	1	0	AGO1-4	7mer-m8	ggaguaccuucccaAGGGGUGa	caccauuauuuccgUCCCCACg
MIMAT0002807	hsa-miR-491-5p	NM_018489	ASH1L	circRNA	chr1	155451365	155451386	-	4	0	AGO1-4	7mer-m8	ggaguacCUUCCCAAGGGGUGa	agccgaaGCACUGCUCCCCACu
MIMAT0002807	hsa-miR-491-5p	NM_020387	RAB25	circRNA	chr1	156040111	156040132	+	2	0	AGO1-4	7mer-m8	ggaguaccuucccaAGGGGUGa	uuuggugccccuugUCCCCACu
MIMAT0002807	hsa-miR-491-5p	NM_170707	LMNA	circRNA	chr1	156075202	156075223	+	1	0	AGO2	7mer-m8	ggaguaccuucccaAGGGGUGa	cuuggcagccccccUCCCCACu
MIMAT0002807	hsa-miR-491-5p	NM_170707	LMNA	circRNA	chr1	156084558	156084579	+	4	0	AGO1,AGO1-4	7mer-m8	ggaguaccuuccCAAGGGGUGa	gcgcccggcccaGAUCCCCACg
MIMAT0002807	hsa-miR-491-5p	NM_170707	LMNA	circRNA	chr1	156109467	156109488	+	5	0	AGO1-4,AGO2	7mer-m8	ggaguaccuucccaAGGGGUGa	ugccccgcccccagUCCCCACc
MIMAT0002807	hsa-miR-491-5p	NM_144580	C1orf85	circRNA	chr1	156262950	156262973	-	12	0	AGO1-4,AGO2	7mer-m8	ggagUACCUUCCCA--AGGGGUGa	uccaGUGGACGGCUUGUCCCCACu
MIMAT0002807	hsa-miR-491-5p	NM_005920	MEF2D	circRNA	chr1	156433925	156433946	-	1	0	AGO2	7mer-m8	ggaguaccuucccaAGGGGUGa	cccucugcugccucUCCCCACc
MIMAT0002807	hsa-miR-491-5p	NM_005920	MEF2D	circRNA	chr1	156436562	156436583	-	17	0	AGO1-4,AGO2	7mer-m8	ggagUACCUUCCCAAGGGGUGa	uacaGUGCAAUAGCUCCCCACc
MIMAT0002807	hsa-miR-491-5p	NM_005920	MEF2D	circRNA	chr1	156458563	156458584	-	1	0	AGO2	7mer-m8	ggaguaccuucccaAGGGGUGa	ccccuucaccgcucUCCCCACu
MIMAT0002807	hsa-miR-491-5p	NM_178229	IQGAP3	circRNA	chr1	156495257	156495278	-	5	1	AGO2	8mer	ggaguaccuucccaAGGGGUGa	cagucucucuguugUCCCCACa
MIMAT0002807	hsa-miR-491-5p	NM_005973	PRCC	circRNA	chr1	156756753	156756774	+	12	0	AGO1,AGO1-4,AGO2	7mer-m8	ggaguaccuucccaAGGGGUGa	auacccuuaccccaUCCCCACu
MIMAT0002807	hsa-miR-491-5p	NM_005973	PRCC	circRNA	chr1	156770527	156770547	+	2	0	AGO1-4,AGO2	7mer-m8	ggaGUACCUUCCCAAGGGGUGa	aaaUGUUGAA-CCCUCCCCACc
MIMAT0002807	hsa-miR-491-5p	NM_003768	PEA15	circRNA	chr1	160184195	160184216	+	8	2	AGO1-4,AGO2	7mer-m8	ggaGUACCUUCCCAAGGGGUGa	uucCUUUGCACCGAUCCCCACc
MIMAT0002807	hsa-miR-491-5p	NM_003768	PEA15	circRNA	chr1	160184344	160184365	+	14	1	AGO1-4,AGO2	7mer-m8	ggaguaccuucccaAGGGGUGa	ccccaagaugccccUCCCCACc
MIMAT0002807	hsa-miR-491-5p	NM_001199873	B4GALT3	circRNA	chr1	161141545	161141570	-	4	0	AGO1-4,AGO2	7mer-m8	ggAGUACCUUCCCA----AGGGGUGa	auUCAUGGGGUUGUAUUCUCCCCACc
MIMAT0002807	hsa-miR-491-5p	NM_001643	APOA2	circRNA	chr1	161193201	161193215	-	2	0	AGO1-4,AGO2	7mer-m8	ggaguaccuucccaAGGGGUGa	#NAME?
MIMAT0002807	hsa-miR-491-5p	NM_003001	SDHC	circRNA	chr1	161298252	161298274	+	9	0	AGO1,AGO1-4,AGO2	8mer	ggaguaccuuccCA-AGGGGUGa	aaaccguccucuGUCUCCCCACa
MIMAT0002807	hsa-miR-491-5p	NM_003115	UAP1	circRNA	chr1	162560141	162560160	+	4	0	AGO1-4,AGO2	7mer-m8	ggagUACCUUCCCAAGGGGUGa	gaagAUG--AGUUUUCCCCACu
MIMAT0002807	hsa-miR-491-5p	NM_003851	CREG1	circRNA	chr1	167510846	167510867	-	5	0	AGO1-4,AGO2	7mer-m8	ggaguaccuucccAAGGGGUGa	uccugaauuuaauUUCCCCACc
MIMAT0002807	hsa-miR-491-5p	NM_018122	DARS2	circRNA	chr1	173822646	173822667	+	3	0	AGO1,AGO2,AGO3	7mer-m8	ggaguaccuuccCAAGGGGUGa	cacccauuuacuGCUCCCCACc
MIMAT0002807	hsa-miR-491-5p	NM_020318	PAPPA2	circRNA	chr1	176709206	176709227	+	1	0	AGO2	7mer-m8	ggaguaccuucccaAGGGGUGa	ugcugaauuucucaUCCCCACg
MIMAT0002807	hsa-miR-491-5p	NM_001531	MR1	circRNA	chr1	181027895	181027920	+	1	0	AGO1-4	8mer	ggaGUACCUUC---CCA-AGGGGUGa	acaUAUGCAGGUCUAGUGUCCCCACa
MIMAT0002807	hsa-miR-491-5p	NM_015149	RGL1	circRNA	chr1	183623435	183623456	+	1	0	AGO2	8mer	ggaguaccuucccAAGGGGUGa	ugcauccugucccUUCCCCACa
MIMAT0002807	hsa-miR-491-5p	NM_052966	FAM129A	circRNA	chr1	184775144	184775165	-	1	0	AGO1-4	8mer	ggaguaccuucccAAGGGGUGa	uugagcaguugcuUUCCCCACa
MIMAT0002807	hsa-miR-491-5p	NM_031935	HMCN1	circRNA	chr1	186094806	186094827	+	2	0	AGO1-4	8mer	ggaguacCUUCCCAAGGGGUGa	cguagcuGAUGGAAUCCCCACa
MIMAT0002807	hsa-miR-491-5p	NM_031935	HMCN1	circRNA	chr1	186097281	186097302	+	2	0	AGO1-4	7mer-m8	ggaGUACCUUCCCAAGGGGUGa	gacUGUGCAUGUUCUCCCCACu
MIMAT0002807	hsa-miR-491-5p	NM_001193571	CSRP1	circRNA	chr1	201453570	201453591	-	4	0	AGO1-4,AGO2	8mer	ggaguaccuucccaAGGGGUGa	agagcaggccccucUCCCCACa
MIMAT0002807	hsa-miR-491-5p	NM_020443	NAV1	circRNA	chr1	201752873	201752894	+	4	0	AGO1-4	7mer-m8	ggaguaccuucccaAGGGGUGa	cagcaguacucccgUCCCCACc
MIMAT0002807	hsa-miR-491-5p	NM_020443	NAV1	circRNA	chr1	201757630	201757651	+	1	0	AGO1-4	7mer-m8	ggaguaccuucccaAGGGGUGa	ccgcuccaacagcaUCCCCACc
MIMAT0002807	hsa-miR-491-5p	NM_020443	NAV1	circRNA	chr1	201792044	201792065	+	2	0	AGO1-4	7mer-m8	ggaguaccuuCCCAAGGGGUGa	cagaaaaccuGAGCUCCCCACu
MIMAT0002807	hsa-miR-491-5p	NM_001114309	ELF3	circRNA	chr1	201984620	201984642	+	3	0	AGO1-4	7mer-m8	ggaGUACC-UUCCCAAGGGGUGa	gacUAUGGCCUCGCCUCCCCACc
MIMAT0002807	hsa-miR-491-5p	NM_001114309	ELF3	circRNA	chr1	201984974	201984995	+	4	0	AGO1-4,AGO2	7mer-m8	ggaguaccuucccaAGGGGUGa	cuaaaacauuccccUCCCCACu
MIMAT0002807	hsa-miR-491-5p	NM_032104	PPP1R12B	circRNA	chr1	202550388	202550409	+	1	0	AGO1-4	7mer-m8	ggaguaccuucccAAGGGGUGa	uuauauuuuucccUUCCCCACc
MIMAT0002807	hsa-miR-491-5p	NM_006618	KDM5B	circRNA	chr1	202696677	202696698	-	4	0	AGO1-4,AGO2	8mer	ggaguaccuucccAAGGGGUGa	gccaauuuuuguuUUCCCCACa
MIMAT0002807	hsa-miR-491-5p	NM_006618	KDM5B	circRNA	chr1	202725633	202725644	-	1	0	AGO1-4	8mer	ggaguaccuUCCCAAGGGGUGa	#NAME?
MIMAT0002807	hsa-miR-491-5p	NM_015999	ADIPOR1	circRNA	chr1	202912993	202913014	-	17	0	AGO1,AGO1-4,AGO2	8mer	ggAGUACCUUCCCAAGGGGUGa	auUCCUUCUACUGCUCCCCACa
MIMAT0002807	hsa-miR-491-5p	NM_006763	BTG2	circRNA	chr1	203278156	203278177	+	24	0	AGO1-4,AGO2	8mer	ggaguaccuucccaAGGGGUGa	cccccagguucuccUCCCCACa
MIMAT0002807	hsa-miR-491-5p	NM_014827	ZC3H11A	circRNA	chr1	203765484	203765505	+	7	0	AGO1-4,AGO2	7mer-m8	ggaguaccuucccAAGGGGUGa	uauccuacacccaUUCCCCACu
MIMAT0002807	hsa-miR-491-5p	NM_014935	PLEKHA6	circRNA	chr1	204192632	204192653	-	1	0	AGO1-4	7mer-m8	ggaguaccuucccaAGGGGUGa	cccugucgucugaaUCCCCACg
MIMAT0002807	hsa-miR-491-5p	NM_002646	PIK3C2B	circRNA	chr1	204438635	204438656	-	6	0	AGO1-4,AGO2	8mer	ggaguaccuucccaAGGGGUGa	acuacaacucacucUCCCCACa
MIMAT0002807	hsa-miR-491-5p	hsa_circ_0000174	hsa_circ_000079	circRNA	chr1	204438635	204438656	-	6	0	AGO1-4,AGO2	8mer	ggaguaccuucccaAGGGGUGa	acuacaacucacucUCCCCACa
MIMAT0002807	hsa-miR-491-5p	NM_002393	MDM4	circRNA	chr1	204507372	204507396	+	16	0	AGO1,AGO1-4,AGO2	8mer	ggaguacCUUC--CCA-AGGGGUGa	aacuacaGAAGACGAUAUCCCCACa
MIMAT0002807	hsa-miR-491-5p	NM_001042758	SRGAP2	circRNA	chr1	206629064	206629085	+	1	0	AGO2	7mer-m8	ggaguaccuuccCAAGGGGUGa	agucccuuugcaGAUCCCCACu
MIMAT0002807	hsa-miR-491-5p	NM_006893	EIF2D	circRNA	chr1	206784688	206784709	-	1	0	AGO2	7mer-m8	ggaguaccuucccAAGGGGUGa	ugugacaacugcuUUCCCCACc
MIMAT0002807	hsa-miR-491-5p	NM_006212	PFKFB2	circRNA	chr1	207235395	207235419	+	7	0	AGO1,AGO1-4,AGO2	7mer-m8	ggAGU--ACCU-UCCCAAGGGGUGa	ccUCAACUGGAUUGGAGUCCCCACc
MIMAT0002807	hsa-miR-491-5p	NM_006212	PFKFB2	circRNA	chr1	207248569	207248590	+	1	0	AGO2	7mer-m8	ggaguaccuucccAAGGGGUGa	agccugcuguuauUUCCCCACu
MIMAT0002807	hsa-miR-491-5p	NM_016343	CENPF	circRNA	chr1	214832282	214832304	+	3	0	AGO2	7mer-m8	ggaguaccUUCCCA-AGGGGUGa	cagaaguuAGCGCUAUCCCCACu
MIMAT0002807	hsa-miR-491-5p	TCONS_00002232	TCONS_00002232	circRNA	chr1	219367748	219367769	+	2	0	AGO1-4	7mer-m8	ggaguaccuucccaAGGGGUGa	aaguauuuuuuaagUCCCCACu
MIMAT0002807	hsa-miR-491-5p	NM_138794	LYPLAL1	circRNA	chr1	219395271	219395292	+	1	0	AGO2	7mer-m8	ggaguaccuucccAAGGGGUGa	auggugacuucccUUCCCCACu
MIMAT0002807	hsa-miR-491-5p	TCONS_l2_00001808	TCONS_l2_00001808	circRNA	chr1	223507056	223507077	-	2	0	AGO1-4	7mer-m8	ggaguaccuucccaAGGGGUGa	cagcccugcaccccUCCCCACc
MIMAT0002807	hsa-miR-491-5p	TCONS_l2_00001808	TCONS_l2_00001808	circRNA	chr1	223909397	223909418	-	2	0	AGO2	7mer-m8	ggaguaccuucccAAGGGGUGa	uuggucuugucccUUCCCCACu
MIMAT0002807	hsa-miR-491-5p	TCONS_l2_00001808	TCONS_l2_00001808	circRNA	chr1	224136655	224136678	-	1	0	AGO1-4	7mer-m8	ggaguaccuUCCCA--AGGGGUGa	cuccuccccAGAGUUGUCCCCACu
MIMAT0002807	hsa-miR-491-5p	NM_014184	CNIH4	circRNA	chr1	224564197	224564218	+	1	0	AGO1-4	7mer-m8	ggaguaccuucccaAGGGGUGa	ccaaacccagaaaaUCCCCACu
MIMAT0002807	hsa-miR-491-5p	NM_001008493	ENAH	circRNA	chr1	225840473	225840494	-	1	0	AGO1-4	7mer-m8	ggAGUACCUUCCCAAGGGGUGa	cgUCUCCGAGCUGCUCCCCACc
MIMAT0002807	hsa-miR-491-5p	NM_014698	TMEM63A	circRNA	chr1	226065125	226065146	-	1	0	AGO2	7mer-m8	ggaGUACCUUCCCAAGGGGUGa	cacCUUUGGUGGCAUCCCCACu
MIMAT0002807	hsa-miR-491-5p	NM_003607	CDC42BPA	circRNA	chr1	227178015	227178037	-	2	0	AGO1-4,AGO2	8mer	ggaGUACCUUCC-CAAGGGGUGa	cagCACGCUGGGCCCUCCCCACa
MIMAT0002807	hsa-miR-491-5p	NM_018072	HEATR1	circRNA	chr1	236714048	236714069	-	2	0	AGO1-4	7mer-m8	ggaguaccuucccaAGGGGUGa	acuucuuuacaaaaUCCCCACc
MIMAT0002807	hsa-miR-491-5p	NM_001035	RYR2	circRNA	chr1	237955423	237955446	+	1	0	AGO2	7mer-m8	ggAGUACC-UUCC-CAAGGGGUGa	guUGAAGGAAAGGAGCUCCCCACg
MIMAT0002807	hsa-miR-491-5p	NM_000740	CHRM3	circRNA	chr1	239985061	239985081	+	1	0	AGO1-4	7mer-m8	ggaguACCUUCCCAAGGGGUGa	ugguuUGGCUGUG-UCCCCACc
MIMAT0002807	hsa-miR-491-5p	NM_003431	ZNF124	circRNA	chr1	247316722	247316742	-	3	0	AGO1-4	7mer-m8	ggaGUACCUUCCCAAGGGGUGa	agaCA-GGAUCAAGUCCCCACu
MIMAT0002807	hsa-miR-491-5p	NM_152834	TMEM18	circRNA	chr2	668256	668278	-	1	0	AGO1-4	7mer-m8	ggaguACCUUCCCA-AGGGGUGa	ugguuUGGCUUUGUGUCCCCACc
MIMAT0002807	hsa-miR-491-5p	NM_018269	ADI1	circRNA	chr2	3519164	3519185	-	1	0	AGO1-4	7mer-m8	ggagUACCUUCCCAAGGGGUGa	caggGUGGAGUUUUUCCCCACc
MIMAT0002807	hsa-miR-491-5p	NM_134421	HPCAL1	circRNA	chr2	10528619	10528641	+	1	0	AGO1-4	7mer-m8	ggAGUACC-UUCCCAAGGGGUGa	uuUCGAGGUGACCUGUCCCCACc
MIMAT0002807	hsa-miR-491-5p	NM_001006946	SDC1	circRNA	chr2	20403663	20403684	-	2	0	AGO1-4	8mer	ggaguaccuucccaAGGGGUGa	gcugaccuucacacUCCCCACa
MIMAT0002807	hsa-miR-491-5p	NM_002997	SDC1	circRNA	chr2	20403663	20403684	-	2	0	AGO1-4	8mer	ggaguaccuucccaAGGGGUGa	gcugaccuucacacUCCCCACa
MIMAT0002807	hsa-miR-491-5p	NM_015317	PUM2	circRNA	chr2	20531327	20531348	-	3	0	AGO1-4	8mer	ggaguaccuucccAAGGGGUGa	uuggguuugcccuUUCCCCACa
MIMAT0002807	hsa-miR-491-5p	NM_000384	APOB	circRNA	chr2	21246481	21246502	-	1	0	AGO1-4	7mer-m8	ggaguaccuucccaAGGGGUGa	gaaugccuuugaacUCCCCACu
MIMAT0002807	hsa-miR-491-5p	NM_001199803	CENPO	circRNA	chr2	25044259	25044280	+	2	0	AGO1-4,AGO2	7mer-m8	ggaguaccuucccaAGGGGUGa	ugagugcgugaaccUCCCCACc
MIMAT0002807	hsa-miR-491-5p	NM_024322	CENPO	circRNA	chr2	25044259	25044280	+	2	0	AGO1-4,AGO2	7mer-m8	ggaguaccuucccaAGGGGUGa	ugagugcgugaaccUCCCCACc
MIMAT0002807	hsa-miR-491-5p	NM_001253723	DPYSL5	circRNA	chr2	27173052	27173073	+	3	2	AGO1-4,AGO2	7mer-m8	ggaguacCUUCCCAAGGGGUGa	gcacccaGGUGACUUCCCCACu
MIMAT0002807	hsa-miR-491-5p	NM_020134	DPYSL5	circRNA	chr2	27173052	27173073	+	3	2	AGO1-4,AGO2	7mer-m8	ggaguacCUUCCCAAGGGGUGa	gcacccaGGUGACUUCCCCACu
MIMAT0002807	hsa-miR-491-5p	NM_013388	PREB	circRNA	chr2	27355210	27355229	-	9	0	AGO1,AGO1-4,AGO2	8mer	ggagUACCUUCCCAAGGGGUGa	cacaGUGCAA--AUUCCCCACa
MIMAT0002807	hsa-miR-491-5p	NM_003459	SLC30A3	circRNA	chr2	27477743	27477767	-	3	0	AGO1-4,AGO2	8mer	ggAGUACCUUCCC----AAGGGGUGa	ggUCA-GUAGGGGCCCCCUCCCCACa
MIMAT0002807	hsa-miR-491-5p	NM_002437	MPV17	circRNA	chr2	27532483	27532504	-	5	1	AGO1-4,AGO2	7mer-m8	ggagUACCUUCCCAAGGGGUGa	gcaaAUGCCACUCAUCCCCACu
MIMAT0002807	hsa-miR-491-5p	NM_014748	SNX17	circRNA	chr2	27596729	27596748	+	1	0	AGO1-4	8mer	ggaGUACCUUCCCAAGGGGUGa	agaCACAGCAGG--UCCCCACa
MIMAT0002807	hsa-miR-491-5p	NM_177983	PPM1G	circRNA	chr2	27607854	27607877	-	3	0	AGO1-4	8mer	ggaguaccUUCCC--AAGGGGUGa	acugucacAAGGGCCCUCCCCACa
MIMAT0002807	hsa-miR-491-5p	NM_199193	BRE	circRNA	chr2	28268633	28268654	+	3	0	AGO1,AGO2	8mer	ggaguaccuucccaAGGGGUGa	agauuucagcaauaUCCCCACa
MIMAT0002807	hsa-miR-491-5p	NM_030915	LBH	circRNA	chr2	30481776	30481797	+	1	0	AGO1-4	7mer-m8	ggaguaccuucccaAGGGGUGa	gugguccucaucccUCCCCACc
MIMAT0002807	hsa-miR-491-5p	NM_182551	LCLAT1	circRNA	chr2	30825314	30825335	+	1	0	AGO1-4	7mer-m8	ggAGUACCUUCCCAAGGGGUGa	uuUUGUUUCGGUGGUCCCCACc
MIMAT0002807	hsa-miR-491-5p	NM_182551	LCLAT1	circRNA	chr2	30863104	30863125	+	2	0	AGO2	8mer	ggagUACCUUCCCAAGGGGUGa	uccaAUAGACACCCUCCCCACa
MIMAT0002807	hsa-miR-491-5p	NM_016252	BIRC6	circRNA	chr2	32770875	32770896	+	7	0	AGO1-4	7mer-m8	ggaguaccuucccAAGGGGUGa	cuuugagccaccaUUCCCCACg
MIMAT0002807	hsa-miR-491-5p	NM_005813	PRKD3	circRNA	chr2	37494615	37494637	-	1	0	AGO1-4	8mer	ggaguacCUUC-CCAAGGGGUGa	uugauaaGAUGAGAUUCCCCACa
MIMAT0002807	hsa-miR-491-5p	NM_005400	PRKCE	circRNA	chr2	45918800	45918821	+	1	0	AGO1-4	7mer-m8	ggaguaccuucccaAGGGGUGa	uuaucagccuucccUCCCCACg
MIMAT0002807	hsa-miR-491-5p	NM_005400	PRKCE	circRNA	chr2	45946872	45946893	+	1	0	AGO1-4	8mer	ggaguaccuucccaAGGGGUGa	aaucauaacccuccUCCCCACa
MIMAT0002807	hsa-miR-491-5p	NM_005400	PRKCE	circRNA	chr2	46052627	46052648	+	1	0	AGO1-4	7mer-m8	ggaguaccuucccAAGGGGUGa	uccuacuuuuuuuUUCCCCACc
MIMAT0002807	hsa-miR-491-5p	NM_001430	EPAS1	circRNA	chr2	46612036	46612057	+	2	0	AGO1-4	7mer-m8	ggaguaccuucccaAGGGGUGa	uaggauuuuuuuccUCCCCACc
MIMAT0002807	hsa-miR-491-5p	NM_020458	TTC7A	circRNA	chr2	47287963	47287984	+	1	0	AGO2	7mer-m8	ggaguaccuucccAAGGGGUGa	ggcggcgggccucUUCCCCACu
MIMAT0002807	hsa-miR-491-5p	NM_014614	PSME4	circRNA	chr2	54150216	54150242	-	1	0	AGO2	7mer-m8	ggAGUACCUUC-----CCAAGGGGUGa	aaUCUUUGAAGCUCUUUGUUCCCCACu
MIMAT0002807	hsa-miR-491-5p	NM_003128	SPTBN1	circRNA	chr2	54895583	54895604	+	22	0	AGO1-4,AGO2	7mer-m8	ggaguaccuucccaAGGGGUGa	ccgcgcgcagacccUCCCCACc
MIMAT0002807	hsa-miR-491-5p	NM_003400	XPO1	circRNA	chr2	61764753	61764774	-	7	0	AGO1-4,AGO2	7mer-m8	ggaguaccuucccaAGGGGUGa	uccccucuccccccUCCCCACc
MIMAT0002807	hsa-miR-491-5p	NM_152516	COMMD1	circRNA	chr2	62363115	62363136	+	1	0	AGO1-4	7mer-m8	ggaguaccuucccaAGGGGUGa	guguccaugaucccUCCCCACu
MIMAT0002807	hsa-miR-491-5p	NM_203437	AFTPH	circRNA	chr2	64778628	64778649	+	11	0	AGO1,AGO1-4,AGO2	7mer-m8	ggaguaccuucccaAGGGGUGa	gaauguacucuucaUCCCCACc
MIMAT0002807	hsa-miR-491-5p	hsa_circ_0001021	hsa_circ_000026*	circRNA	chr2	64778628	64778649	+	11	0	AGO1,AGO1-4,AGO2	7mer-m8	ggaguaccuucccaAGGGGUGa	gaauguacucuucaUCCCCACc
MIMAT0002807	hsa-miR-491-5p	NM_181784	SPRED2	circRNA	chr2	65539059	65539080	-	5	0	AGO1,AGO1-4,AGO2	7mer-m8	ggaguaccuucccAAGGGGUGa	cuccccacucccuUUCCCCACu
MIMAT0002807	hsa-miR-491-5p	NM_181784	SPRED2	circRNA	chr2	65539072	65539092	-	2	0	AGO1-4,AGO2	7mer-m8	ggaGUACCUUCCCAAGGGGUGa	agaCAUGG-CCUGCUCCCCACu
MIMAT0002807	hsa-miR-491-5p	NM_181784	SPRED2	circRNA	chr2	65659347	65659368	-	3	0	AGO1-4,AGO2	7mer-m8	ggaguaccuucccaAGGGGUGa	ccuccgcccgccucUCCCCACg
MIMAT0002807	hsa-miR-491-5p	NM_017880	C2orf42	circRNA	chr2	70377439	70377460	-	31	0	AGO1,AGO1-4,AGO2,AGO3,AGO4	7mer-m8	ggaguaccuucccaAGGGGUGa	gcuuaauuugcacaUCCCCACc
MIMAT0002807	hsa-miR-491-5p	NM_016297	PCYOX1	circRNA	chr2	70508260	70508281	+	6	0	AGO1,AGO1-4,AGO2	7mer-m8	ggaguaccUUCCCAAGGGGUGa	uguauuaaAAUUUUUCCCCACu
MIMAT0002807	hsa-miR-491-5p	NM_003236	TGFA	circRNA	chr2	70677610	70677631	-	1	0	AGO1-4	8mer	ggAGUACCUUCCCAAGGGGUGa	uuUAAUGGGCCACCUCCCCACa
MIMAT0002807	hsa-miR-491-5p	NM_144582	TEX261	circRNA	chr2	71215587	71215608	-	1	0	AGO2	7mer-m8	ggAGUACCUU-CCCAAGGGGUGa	acUC-UGGAGCCCCAUCCCCACc
MIMAT0002807	hsa-miR-491-5p	NM_144582	TEX261	circRNA	chr2	71219063	71219084	-	1	0	AGO2	7mer-m8	ggAGUACCUUCCCAAGGGGUGa	cgUCUUUGAGCGCUUCCCCACc
MIMAT0002807	hsa-miR-491-5p	NM_001130981	DYSF	circRNA	chr2	71839901	71839925	+	1	0	AGO1-4	8mer	ggAGUACCUUCCCA---AGGGGUGa	acUCGGCGGAGAGUCCAUCCCCACa
MIMAT0002807	hsa-miR-491-5p	NM_003124	SPR	circRNA	chr2	73118719	73118740	+	1	0	AGO1-4	8mer	ggaguaccuucCCAAGGGGUGa	cagagcccuguGGCUCCCCACa
MIMAT0002807	hsa-miR-491-5p	NM_015470	RAB11FIP5	circRNA	chr2	73306893	73306912	-	2	0	AGO1-4	7mer-m8	ggaGUACCUUCCCAAGGGGUGa	cccCAUG--AGCCCUCCCCACc
MIMAT0002807	hsa-miR-491-5p	NM_144993	TET3	circRNA	chr2	74275505	74275525	+	1	0	AGO1-4	7mer-m8	ggaGUACCUUCCCAAGGGGUGa	gccCA-GGCCGAGUUCCCCACc
MIMAT0002807	hsa-miR-491-5p	NM_144993	TET3	circRNA	chr2	74329189	74329210	+	3	0	AGO1-4,AGO2	7mer-m8	ggagUACCUUCCCAAGGGGUGa	gaagAAGGGGGUCGUCCCCACc
MIMAT0002807	hsa-miR-491-5p	NM_144993	TET3	circRNA	chr2	74331992	74332011	+	8	0	AGO1-4,AGO2	7mer-m8	ggaGUACCUUCCCAAGGGGUGa	cucCAUUGGAUG--UCCCCACu
MIMAT0002807	hsa-miR-491-5p	NM_004082	DCTN1	circRNA	chr2	74598715	74598736	-	2	0	AGO1-4	7mer-m8	ggaguaccuucccaAGGGGUGa	ggcagcacccaucaUCCCCACg
MIMAT0002807	hsa-miR-491-5p	NR_033935	DCTN1	circRNA	chr2	74598715	74598736	-	2	0	AGO1-4	7mer-m8	ggaguaccuucccaAGGGGUGa	ggcagcacccaucaUCCCCACg
MIMAT0002807	hsa-miR-491-5p	NM_017750	RETSAT	circRNA	chr2	85570893	85570914	-	1	0	AGO1-4	7mer-m8	ggaguaccuucCCAAGGGGUGa	gugugacugcaGGAUCCCCACu
MIMAT0002807	hsa-miR-491-5p	NM_017750	RETSAT	circRNA	chr2	85577167	85577188	-	2	0	AGO2	7mer-m8	ggaguaccuucccAAGGGGUGa	acucagcuacaucUUCCCCACu
MIMAT0002807	hsa-miR-491-5p	NM_001135021	ELMOD3	circRNA	chr2	85618407	85618428	+	1	0	AGO1-4	8mer	ggaguaccuuccCAAGGGGUGa	ggauguucugcaGAUCCCCACa
MIMAT0002807	hsa-miR-491-5p	NM_015425	POLR1A	circRNA	chr2	86315912	86315936	-	1	0	AGO2	7mer-m8	ggagUAC-CUUC-CCA-AGGGGUGa	augaAUGCUAAGCGCUGUCCCCACu
MIMAT0002807	hsa-miR-491-5p	NM_017952	PTCD3	circRNA	chr2	86360469	86360484	+	1	0	AGO1-4	7mer-m8	ggaguaccuucccAAGGGGUGa	#NAME?
MIMAT0002807	hsa-miR-491-5p	NM_020151	STARD7	circRNA	chr2	96858121	96858143	-	7	1	AGO1-4,AGO2	8mer	ggagUACC-UUCCCAAGGGGUGa	ccaaAUGGUUAUCCGUCCCCACa
MIMAT0002807	hsa-miR-491-5p	NM_015348	TMEM131	circRNA	chr2	98373458	98373479	-	5	1	AGO1-4,AGO2	7mer-m8	ggaguaccuucccaAGGGGUGa	uacugcagcuccccUCCCCACc
MIMAT0002807	hsa-miR-491-5p	NM_144706	C2orf15	circRNA	chr2	99816100	99816121	+	1	0	AGO2	7mer-m8	ggaguaccuucccaAGGGGUGa	gugcacaccccgacUCCCCACc
MIMAT0002807	hsa-miR-491-5p	NM_145212	MRPL30	circRNA	chr2	99816100	99816121	+	1	0	AGO2	7mer-m8	ggaguaccuucccaAGGGGUGa	gugcacaccccgacUCCCCACc
MIMAT0002807	hsa-miR-491-5p	NM_001025108	AFF3	circRNA	chr2	100210688	100210711	-	1	0	AGO1-4	8mer	ggaguaccUUCCCA--AGGGGUGa	ggcuaaacAAAGUUAAUCCCCACa
MIMAT0002807	hsa-miR-491-5p	NM_002518	NPAS2	circRNA	chr2	101492785	101492809	+	1	0	AGO1-4	7mer-m8	ggAGU-AC--CUUCCCAAGGGGUGa	auUCAGUGAUGACCUGGUCCCCACg
MIMAT0002807	hsa-miR-491-5p	NM_001242559	MAP4K4	circRNA	chr2	102481428	102481447	+	1	0	AGO1-4	7mer-m8	ggaGUACCUUCCCAAGGGGUGa	uccCGUCGA--GAUUCCCCACu
MIMAT0002807	hsa-miR-491-5p	NM_000877	IL1R1	circRNA	chr2	102795911	102795932	+	1	0	AGO2	7mer-m8	ggaguaccuucccaAGGGGUGa	ccuuugacuuauugUCCCCACu
MIMAT0002807	hsa-miR-491-5p	NM_006267	RANBP2	circRNA	chr2	108507498	108507519	+	6	0	AGO1-4	7mer-m8	ggagUACCUUCCCAAGGGGUGa	aggaAUGAAUUCACUCCCCACu
MIMAT0002807	hsa-miR-491-5p	NM_182588	RGPD4	circRNA	chr2	108507498	108507519	+	6	0	AGO1-4	7mer-m8	ggagUACCUUCCCAAGGGGUGa	aggaAUGAAUUCACUCCCCACu
MIMAT0002807	hsa-miR-491-5p	NM_006267	RANBP2	circRNA	chr2	109124339	109124360	+	8	0	AGO1-4,AGO2	7mer-m8	ggagUACCUUCCCAAGGGGUGa	aggaAUGAAUUCACUCCCCACu
MIMAT0002807	hsa-miR-491-5p	NM_182588	RGPD4	circRNA	chr2	109124339	109124360	+	8	0	AGO1-4,AGO2	7mer-m8	ggagUACCUUCCCAAGGGGUGa	aggaAUGAAUUCACUCCCCACu
MIMAT0002807	hsa-miR-491-5p	NM_006267	RANBP2	circRNA	chr2	109189299	109189320	+	1	0	AGO1-4	7mer-m8	ggaguaccuucccaAGGGGUGa	ccgcugaaccugccUCCCCACc
MIMAT0002807	hsa-miR-491-5p	NM_182588	RGPD4	circRNA	chr2	109189299	109189320	+	1	0	AGO1-4	7mer-m8	ggaguaccuucccaAGGGGUGa	ccgcugaaccugccUCCCCACc
MIMAT0002807	hsa-miR-491-5p	NM_006267	RANBP2	circRNA	chr2	109225807	109225828	+	1	0	AGO1-4	7mer-m8	ggagUACCUUCCCAAGGGGUGa	caggAUUGCACCCCUCCCCACc
MIMAT0002807	hsa-miR-491-5p	NM_182588	RGPD4	circRNA	chr2	109225807	109225828	+	1	0	AGO1-4	7mer-m8	ggagUACCUUCCCAAGGGGUGa	caggAUUGCACCCCUCCCCACc
MIMAT0002807	hsa-miR-491-5p	NM_001099289	SH3RF3	circRNA	chr2	109501357	109501378	+	1	1	AGO1-4	7mer-m8	ggaguaccuucccaAGGGGUGa	ggcuuuucagccccUCCCCACu
MIMAT0002807	hsa-miR-491-5p	NM_001193485	LIMS1	circRNA	chr2	109501357	109501378	+	1	1	AGO1-4	7mer-m8	ggaguaccuucccaAGGGGUGa	ggcuuuucagccccUCCCCACu
MIMAT0002807	hsa-miR-491-5p	NM_006267	RANBP2	circRNA	chr2	109501357	109501378	+	1	1	AGO1-4	7mer-m8	ggaguaccuucccaAGGGGUGa	ggcuuuucagccccUCCCCACu
MIMAT0002807	hsa-miR-491-5p	NM_001193485	LIMS1	circRNA	chr2	110018766	110018788	+	1	0	AGO2	7mer-m8	ggaGUACCU-UCCCAAGGGGUGa	cugCAGGGAUUCUCUUCCCCACc
MIMAT0002807	hsa-miR-491-5p	NM_006267	RANBP2	circRNA	chr2	110018766	110018788	+	1	0	AGO2	7mer-m8	ggaGUACCU-UCCCAAGGGGUGa	cugCAGGGAUUCUCUUCCCCACc
MIMAT0002807	hsa-miR-491-5p	NM_022336	EDAR	circRNA	chr2	110301593	110301613	-	1	0	AGO1-4	7mer-m8	ggagUACCUUCCCAAGGGGUGa	acaaGUGGAA-AAUUCCCCACc
MIMAT0002807	hsa-miR-491-5p	NM_001193485	LIMS1	circRNA	chr2	110613762	110613783	+	6	0	AGO1-4	7mer-m8	ggagUACCUUCCCAAGGGGUGa	aggaAUGAAUUCACUCCCCACu
MIMAT0002807	hsa-miR-491-5p	NM_006267	RANBP2	circRNA	chr2	110613762	110613783	+	6	0	AGO1-4	7mer-m8	ggagUACCUUCCCAAGGGGUGa	aggaAUGAAUUCACUCCCCACu
MIMAT0002807	hsa-miR-491-5p	NM_001037866	RGPD6	circRNA	chr2	111471356	111471377	-	1	0	AGO2	7mer-m8	ggaguaccuucccaAGGGGUGa	caccaucugucaagUCCCCACc
MIMAT0002807	hsa-miR-491-5p	NM_001164463	RGPD8	circRNA	chr2	111471356	111471377	-	1	0	AGO2	7mer-m8	ggaguaccuucccaAGGGGUGa	caccaucugucaagUCCCCACc
MIMAT0002807	hsa-miR-491-5p	NM_022662	ANAPC1	circRNA	chr2	111471356	111471377	-	1	0	AGO2	7mer-m8	ggaguaccuucccaAGGGGUGa	caccaucugucaagUCCCCACc
MIMAT0002807	hsa-miR-491-5p	NM_001037866	RGPD6	circRNA	chr2	112004630	112004651	-	1	0	AGO2	8mer	ggAGUACCUUCCCAAGGGGUGa	ucUGAGCGUGGGCCUCCCCACa
MIMAT0002807	hsa-miR-491-5p	NM_001164463	RGPD8	circRNA	chr2	112004630	112004651	-	1	0	AGO2	8mer	ggAGUACCUUCCCAAGGGGUGa	ucUGAGCGUGGGCCUCCCCACa
MIMAT0002807	hsa-miR-491-5p	NM_022662	ANAPC1	circRNA	chr2	112004630	112004651	-	1	0	AGO2	8mer	ggAGUACCUUCCCAAGGGGUGa	ucUGAGCGUGGGCCUCCCCACa
MIMAT0002807	hsa-miR-491-5p	TCONS_l2_00014799	TCONS_l2_00014799	circRNA	chr2	112004630	112004651	-	1	0	AGO2	8mer	ggAGUACCUUCCCAAGGGGUGa	ucUGAGCGUGGGCCUCCCCACa
MIMAT0002807	hsa-miR-491-5p	NM_001037866	RGPD6	circRNA	chr2	112024972	112024993	-	1	1	AGO2	8mer	ggaguaccuucccAAGGGGUGa	ccccuguccuccaUUCCCCACa
MIMAT0002807	hsa-miR-491-5p	NM_001164463	RGPD8	circRNA	chr2	112024972	112024993	-	1	1	AGO2	8mer	ggaguaccuucccAAGGGGUGa	ccccuguccuccaUUCCCCACa
MIMAT0002807	hsa-miR-491-5p	NM_022662	ANAPC1	circRNA	chr2	112024972	112024993	-	1	1	AGO2	8mer	ggaguaccuucccAAGGGGUGa	ccccuguccuccaUUCCCCACa
MIMAT0002807	hsa-miR-491-5p	NM_001037866	RGPD6	circRNA	chr2	112068813	112068834	-	1	0	AGO2	7mer-m8	ggaguaccuucccaAGGGGUGa	ccucugccuuucucUCCCCACu
MIMAT0002807	hsa-miR-491-5p	NM_001164463	RGPD8	circRNA	chr2	112068813	112068834	-	1	0	AGO2	7mer-m8	ggaguaccuucccaAGGGGUGa	ccucugccuuucucUCCCCACu
MIMAT0002807	hsa-miR-491-5p	NM_022662	ANAPC1	circRNA	chr2	112068813	112068834	-	1	0	AGO2	7mer-m8	ggaguaccuucccaAGGGGUGa	ccucugccuuucucUCCCCACu
MIMAT0002807	hsa-miR-491-5p	NM_001037866	RGPD6	circRNA	chr2	112190775	112190794	-	1	0	AGO2	7mer-m8	ggaGUACCUUCCCAAGGGGUGa	gggUAUUGAAAG--UCCCCACu
MIMAT0002807	hsa-miR-491-5p	NM_001164463	RGPD8	circRNA	chr2	112190775	112190794	-	1	0	AGO2	7mer-m8	ggaGUACCUUCCCAAGGGGUGa	gggUAUUGAAAG--UCCCCACu
MIMAT0002807	hsa-miR-491-5p	NM_022662	ANAPC1	circRNA	chr2	112190775	112190794	-	1	0	AGO2	7mer-m8	ggaGUACCUUCCCAAGGGGUGa	gggUAUUGAAAG--UCCCCACu
MIMAT0002807	hsa-miR-491-5p	NM_001037866	RGPD6	circRNA	chr2	112223684	112223705	-	1	0	AGO1-4	8mer	ggaguaccuucccAAGGGGUGa	ggacccuucucccUUCCCCACa
MIMAT0002807	hsa-miR-491-5p	NM_001164463	RGPD8	circRNA	chr2	112223684	112223705	-	1	0	AGO1-4	8mer	ggaguaccuucccAAGGGGUGa	ggacccuucucccUUCCCCACa
MIMAT0002807	hsa-miR-491-5p	NM_022662	ANAPC1	circRNA	chr2	112223684	112223705	-	1	0	AGO1-4	8mer	ggaguaccuucccAAGGGGUGa	ggacccuucucccUUCCCCACa
MIMAT0002807	hsa-miR-491-5p	NM_001037866	RGPD6	circRNA	chr2	112275241	112275263	-	1	0	AGO1-4	7mer-m8	ggaguacCUUCCCA-AGGGGUGa	uuggagaGAAUCAUGUCCCCACu
MIMAT0002807	hsa-miR-491-5p	NM_001164463	RGPD8	circRNA	chr2	112275241	112275263	-	1	0	AGO1-4	7mer-m8	ggaguacCUUCCCA-AGGGGUGa	uuggagaGAAUCAUGUCCCCACu
MIMAT0002807	hsa-miR-491-5p	NM_022662	ANAPC1	circRNA	chr2	112275241	112275263	-	1	0	AGO1-4	7mer-m8	ggaguacCUUCCCA-AGGGGUGa	uuggagaGAAUCAUGUCCCCACu
MIMAT0002807	hsa-miR-491-5p	NM_001037866	RGPD6	circRNA	chr2	112779650	112779671	-	1	0	AGO1-4	7mer-m8	ggagUACCUUCCCAAGGGGUGa	uggaGUGUCACAGUUCCCCACu
MIMAT0002807	hsa-miR-491-5p	NM_001164463	RGPD8	circRNA	chr2	112779650	112779671	-	1	0	AGO1-4	7mer-m8	ggagUACCUUCCCAAGGGGUGa	uggaGUGUCACAGUUCCCCACu
MIMAT0002807	hsa-miR-491-5p	NM_022662	ANAPC1	circRNA	chr2	112779650	112779671	-	1	0	AGO1-4	7mer-m8	ggagUACCUUCCCAAGGGGUGa	uggaGUGUCACAGUUCCCCACu
MIMAT0002807	hsa-miR-491-5p	NM_198581	ZC3H6	circRNA	chr2	113094665	113094686	+	1	0	AGO2	7mer-m8	ggaguaccuucccaAGGGGUGa	ccugcucuuuuuugUCCCCACc
MIMAT0002807	hsa-miR-491-5p	NM_001037866	RGPD6	circRNA	chr2	113127445	113127466	-	5	0	AGO1-4	7mer-m8	ggagUACCUUCCCAAGGGGUGa	aggaAUGAAUUCACUCCCCACu
MIMAT0002807	hsa-miR-491-5p	NM_001164463	RGPD8	circRNA	chr2	113127445	113127466	-	5	0	AGO1-4	7mer-m8	ggagUACCUUCCCAAGGGGUGa	aggaAUGAAUUCACUCCCCACu
MIMAT0002807	hsa-miR-491-5p	NM_022662	ANAPC1	circRNA	chr2	113127445	113127466	-	5	0	AGO1-4	7mer-m8	ggagUACCUUCCCAAGGGGUGa	aggaAUGAAUUCACUCCCCACu
MIMAT0002807	hsa-miR-491-5p	NM_153712	TTL	circRNA	chr2	113286779	113286800	+	7	0	AGO1-4,AGO2	7mer-m8	ggaguaccuuCCCAAGGGGUGa	gguugccuguGUGUUCCCCACc
MIMAT0002807	hsa-miR-491-5p	NM_153712	TTL	circRNA	chr2	113287657	113287682	+	1	0	AGO1-4	7mer-m8	ggaGUACCUU----CCCAAGGGGUGa	accCAUUGAAAACUGCCCUCCCCACc
MIMAT0002807	hsa-miR-491-5p	NM_019014	POLR1B	circRNA	chr2	113321950	113321972	+	2	0	AGO1-4	7mer-m8	ggaGUACCUUCC-CAAGGGGUGa	uccCAUUGAUGGAGCUCCCCACc
MIMAT0002807	hsa-miR-491-5p	NM_005415	SLC20A1	circRNA	chr2	113405233	113405254	+	3	0	AGO1-4,AGO2	7mer-m8	ggAGUACCUUCCCAAGGGGUGa	ugUCUUGGUUCGUGUCCCCACu
MIMAT0002807	hsa-miR-491-5p	NM_012455	PSD4	circRNA	chr2	113959169	113959190	+	4	0	AGO1-4	7mer-m8	ggaGUACCUUCCCAAGGGGUGa	uaaUAUUGCUGUGCUCCCCACc
MIMAT0002807	hsa-miR-491-5p	NM_182915	STEAP3	circRNA	chr2	120003468	120003489	+	1	0	AGO2	7mer-m8	ggaguaccuucccAAGGGGUGa	ccuggccucccucUUCCCCACu
MIMAT0002807	hsa-miR-491-5p	NM_004622	TSN	circRNA	chr2	122524159	122524180	+	6	0	AGO1-4	8mer	ggaguACCUUCCCAAGGGGUGa	acuguUGGUGGUCUUCCCCACa
MIMAT0002807	hsa-miR-491-5p	NR_027671	UGGT1	circRNA	chr2	128947804	128947825	+	2	0	AGO2	7mer-m8	ggaguaccuucccaAGGGGUGa	acauccuugugcccUCCCCACc
MIMAT0002807	hsa-miR-491-5p	NR_027671	UGGT1	circRNA	chr2	128948068	128948089	+	2	0	AGO2	7mer-m8	ggaguaccuucccAAGGGGUGa	aauauuacacuuaUUCCCCACc
MIMAT0002807	hsa-miR-491-5p	NM_001349	DARS	circRNA	chr2	136680413	136680433	-	13	2	AGO1-4,AGO2	8mer	ggaGUACCUUCCCAAGGGGUGa	auaCCUGGCUCAG-UCCCCACa
MIMAT0002807	hsa-miR-491-5p	NM_001008540	CXCR4	circRNA	chr2	136874892	136874913	-	1	0	AGO2	7mer-m8	ggaguaccuucccAAGGGGUGa	cgaagcgcgccucUUCCCCACg
MIMAT0002807	hsa-miR-491-5p	NM_018557	LRP1B	circRNA	chr2	142888808	142888829	-	1	0	AGO2	8mer	ggaguaccuucccaAGGGGUGa	uccaaagacccaaaUCCCCACa
MIMAT0002807	hsa-miR-491-5p	NM_014795	ZEB2	circRNA	chr2	145187449	145187468	-	1	0	AGO1-4	8mer	ggaGUACCUUCCCAAGGGGUGa	aacCAUG--AGUCCUCCCCACa
MIMAT0002807	hsa-miR-491-5p	NM_018328	MBD5	circRNA	chr2	149215990	149216011	+	4	0	AGO1-4,AGO2	7mer-m8	ggaguaccuucccaAGGGGUGa	uaaaaacuuuacacUCCCCACc
MIMAT0002807	hsa-miR-491-5p	NM_001177665	RIF1	circRNA	chr2	152314344	152314366	+	8	0	AGO1-4,AGO2	7mer-m8	ggAGUACCU-UCCCAAGGGGUGa	cuUCUUGAACAACUCUCCCCACu
MIMAT0002807	hsa-miR-491-5p	NM_018151	RIF1	circRNA	chr2	152314344	152314366	+	8	0	AGO1-4,AGO2	7mer-m8	ggAGUACCU-UCCCAAGGGGUGa	cuUCUUGAACAACUCUCCCCACu
MIMAT0002807	hsa-miR-491-5p	NM_003628	PKP4	circRNA	chr2	159316488	159316509	+	2	0	AGO1-4,AGO2	7mer-m8	ggaguaccuucccaAGGGGUGa	caaagugcauucccUCCCCACc
MIMAT0002807	hsa-miR-491-5p	NM_003628	PKP4	circRNA	chr2	159350364	159350385	+	2	0	AGO1-4	7mer-m8	ggaguaccuucccAAGGGGUGa	ucacucucccccuUUCCCCACc
MIMAT0002807	hsa-miR-491-5p	NM_003628	PKP4	circRNA	chr2	159481711	159481733	+	3	0	AGO1-4,AGO2	7mer-m8	ggaguacCUU-CCCAAGGGGUGa	accgccaGAGUGGGGUCCCCACu
MIMAT0002807	hsa-miR-491-5p	NM_016836	RBMS1	circRNA	chr2	161223761	161223782	-	5	0	AGO1-4	8mer	ggaGUACCUUCCCAAGGGGUGa	aucCGAGGACUGCCUCCCCACa
MIMAT0002807	hsa-miR-491-5p	NM_001172173	CSRNP3	circRNA	chr2	166535345	166535366	+	1	0	AGO2	7mer-m8	ggaguaccuucccaAGGGGUGa	ccgagagcagcaaaUCCCCACg
MIMAT0002807	hsa-miR-491-5p	NM_001172173	CSRNP3	circRNA	chr2	166537609	166537630	+	1	0	AGO2	7mer-m8	ggaguaccuucccaAGGGGUGa	aauaaaacaugcacUCCCCACc
MIMAT0002807	hsa-miR-491-5p	NR_045375	LOC100506124	circRNA	chr2	166731767	166731788	-	1	0	AGO1-4	7mer-m8	ggaguaccuucccaAGGGGUGa	aaaaaacuagcaucUCCCCACu
MIMAT0002807	hsa-miR-491-5p	NM_012290	TLK1	circRNA	chr2	172017103	172017124	-	1	0	AGO1-4	7mer-m8	ggaguaccuucccaAGGGGUGa	ccucaccucuuuccUCCCCACc
MIMAT0002807	hsa-miR-491-5p	NM_133646	ZAK	circRNA	chr2	174090354	174090375	+	1	0	AGO1-4	7mer-m8	ggaguaccuucccAAGGGGUGa	guagcauugucccUUCCCCACu
MIMAT0002807	hsa-miR-491-5p	NM_138285	NUP35	circRNA	chr2	184026700	184026721	+	1	0	AGO1-4	7mer-m8	ggaguaccuucccaAGGGGUGa	acaucucccacuagUCCCCACu
MIMAT0002807	hsa-miR-491-5p	NM_173822	FAM126B	circRNA	chr2	201910276	201910298	-	3	0	AGO1-4,AGO2	7mer-m8	ggAGUACCUU-CCCAAGGGGUGa	ucUUAACAAAUGAAUUCCCCACu
MIMAT0002807	hsa-miR-491-5p	NM_001204	BMPR2	circRNA	chr2	203241908	203241929	+	2	0	AGO1-4	8mer	ggaguaccuucccAAGGGGUGa	uuggcucccugcuUUCCCCACa
MIMAT0002807	hsa-miR-491-5p	NM_152526	PARD3B	circRNA	chr2	205538287	205538312	+	1	0	AGO2	7mer-m8	ggaguACCUUC----CCAAGGGGUGa	uuuguUAGAAGACCUGGCUCCCCACc
MIMAT0002807	hsa-miR-491-5p	NM_017759	INO80D	circRNA	chr2	206859547	206859568	-	3	0	AGO1,AGO1-4	8mer	ggaguaccuucccAAGGGGUGa	gauuuaauucuuaUUCCCCACa
MIMAT0002807	hsa-miR-491-5p	NM_017759	INO80D	circRNA	chr2	206869634	206869655	-	5	0	AGO1-4,AGO2	8mer	ggaguaccuucccaAGGGGUGa	gaccauaucaccucUCCCCACa
MIMAT0002807	hsa-miR-491-5p	NM_005006	NDUFS1	circRNA	chr2	207007421	207007445	-	8	0	AGO1,AGO1-4,AGO2	7mer-m8	ggaGUACCUUC-CC--AAGGGGUGa	augCACUGAAGAGGUCUUCCCCACu
MIMAT0002807	hsa-miR-491-5p	NM_006055	LANCL1	circRNA	chr2	211297756	211297777	-	2	0	AGO1-4,AGO2	7mer-m8	ggaguaccuucccaAGGGGUGa	aacuucaaaccaaaUCCCCACu
MIMAT0002807	hsa-miR-491-5p	NM_006055	LANCL1	circRNA	chr2	211299241	211299262	-	2	0	AGO2	8mer	ggaguaccuucccaAGGGGUGa	ggcugaccugcuagUCCCCACa
MIMAT0002807	hsa-miR-491-5p	NM_212482	FN1	circRNA	chr2	216300661	216300682	-	13	0	AGO1-4	7mer-m8	ggaguaccuucccAAGGGGUGa	uccacccguccccUUCCCCACc
MIMAT0002807	hsa-miR-491-5p	NM_014140	SMARCAL1	circRNA	chr2	217285026	217285047	+	1	0	AGO1	7mer-m8	ggaguaccUUCCCAAGGGGUGa	agcagcccAGAGCCUCCCCACg
MIMAT0002807	hsa-miR-491-5p	NM_000597	IGFBP2	circRNA	chr2	217498568	217498589	+	2	0	AGO1-4	7mer-m8	ggaguaccuucccaAGGGGUGa	gggcugcgcugcuaUCCCCACc
MIMAT0002807	hsa-miR-491-5p	NM_000599	IGFBP5	circRNA	chr2	217537988	217538009	-	3	0	AGO1,AGO1-4,AGO2	7mer-m8	ggaguaccuucccaAGGGGUGa	ucucccaccccaucUCCCCACc
MIMAT0002807	hsa-miR-491-5p	NM_000599	IGFBP5	circRNA	chr2	217539792	217539813	-	2	0	AGO1-4	7mer-m8	ggaguaccuucCCAAGGGGUGa	aaauuuccuuaGCUUCCCCACc
MIMAT0002807	hsa-miR-491-5p	NM_000599	IGFBP5	circRNA	chr2	217540243	217540265	-	1	0	AGO1-4	7mer-m8	ggaguACCUUC-CCAAGGGGUGa	ggauuUGACAGUGAUUCCCCACg
MIMAT0002807	hsa-miR-491-5p	NM_022648	TNS1	circRNA	chr2	218664584	218664604	-	4	0	AGO1-4,AGO2	7mer-m8	ggaGUACCUUCCCAAGGGGUGa	guaCACUGACGCG-UCCCCACu
MIMAT0002807	hsa-miR-491-5p	NM_022648	TNS1	circRNA	chr2	218664723	218664744	-	2	1	AGO1-4,AGO2	7mer-m8	ggaguaccuucccAAGGGGUGa	ucacccagcauccUUCCCCACc
MIMAT0002807	hsa-miR-491-5p	NM_022648	TNS1	circRNA	chr2	218713246	218713267	-	1	0	AGO1-4	7mer-m8	ggaguaccuucccaAGGGGUGa	acccagaggcccugUCCCCACu
MIMAT0002807	hsa-miR-491-5p	NM_015488	PNKD	circRNA	chr2	219211115	219211136	+	7	1	AGO1-4,AGO2	7mer-m8	ggaguaccuUCCCAAGGGGUGa	agacuaguuAGAGUUCCCCACu
MIMAT0002807	hsa-miR-491-5p	NM_001105537	ZNF142	circRNA	chr2	219503079	219503100	-	1	0	AGO2	8mer	ggaguaccuuccCAAGGGGUGa	ccugcuccugccGCUCCCCACa
MIMAT0002807	hsa-miR-491-5p	NM_015680	CNPPD1	circRNA	chr2	220037458	220037479	-	6	0	AGO1-4	7mer-m8	ggaguaccuucccaAGGGGUGa	ccccaaccguacagUCCCCACu
MIMAT0002807	hsa-miR-491-5p	NM_001173408	OBSL1	circRNA	chr2	220432022	220432043	-	3	0	AGO1-4,AGO2	7mer-m8	ggaGUACCUUCCCAAGGGGUGa	ggaCAUGGCCGUAGUCCCCACg
MIMAT0002807	hsa-miR-491-5p	NM_015311	OBSL1	circRNA	chr2	220432022	220432043	-	3	0	AGO1-4,AGO2	7mer-m8	ggaGUACCUUCCCAAGGGGUGa	ggaCAUGGCCGUAGUCCCCACg
MIMAT0002807	hsa-miR-491-5p	NM_001173408	OBSL1	circRNA	chr2	220432946	220432967	-	3	0	AGO1-4,AGO2	7mer-m8	ggaguaccuucccaAGGGGUGa	acccaacucccgcaUCCCCACg
MIMAT0002807	hsa-miR-491-5p	NM_015311	OBSL1	circRNA	chr2	220432946	220432967	-	3	0	AGO1-4,AGO2	7mer-m8	ggaguaccuucccaAGGGGUGa	acccaacucccgcaUCCCCACg
MIMAT0002807	hsa-miR-491-5p	NM_000092	COL4A4	circRNA	chr2	227869393	227869414	-	2	0	AGO2	8mer	ggaguaccuucccaAGGGGUGa	uucugcucucacacUCCCCACa
MIMAT0002807	hsa-miR-491-5p	NM_001135187	AGFG1	circRNA	chr2	228395872	228395892	+	4	0	AGO1-4,AGO2	8mer	ggAGUACCUUCCCAAGGGGUGa	aaUUUUGG-AGGUUUCCCCACa
MIMAT0002807	hsa-miR-491-5p	NM_138402	SP140L	circRNA	chr2	231212799	231212820	+	1	0	AGO1-4	7mer-m8	ggaguaccuucccAAGGGGUGa	cucaggcucucuuUUCCCCACu
MIMAT0002807	hsa-miR-491-5p	hsa_circ_0001105	hsa_circ_001735	circRNA	chr2	231212799	231212820	+	1	0	AGO1-4	7mer-m8	ggaguaccuucccAAGGGGUGa	cucaggcucucuuUUCCCCACu
MIMAT0002807	hsa-miR-491-5p	hsa_circ_0001106	hsa_circ_001283	circRNA	chr2	231212799	231212820	+	1	0	AGO1-4	7mer-m8	ggaguaccuucccAAGGGGUGa	cucaggcucucuuUUCCCCACu
MIMAT0002807	hsa-miR-491-5p	NM_022730	COPS7B	circRNA	chr2	232672465	232672486	+	3	0	AGO1-4,AGO2	7mer-m8	ggaguaccUUCCCAAGGGGUGa	cccucaccAGCGCCUCCCCACc
MIMAT0002807	hsa-miR-491-5p	NM_152383	DIS3L2	circRNA	chr2	232986540	232986561	+	1	0	AGO1-4	7mer-m8	ggaguaccuucccaAGGGGUGa	cuaccucauauaccUCCCCACu
MIMAT0002807	hsa-miR-491-5p	NM_152383	DIS3L2	circRNA	chr2	232986548	232986569	+	1	0	AGO1-4	7mer-m8	ggaguaccuucccAAGGGGUGa	uauaccuccccacUUCCCCACu
MIMAT0002807	hsa-miR-491-5p	NM_001243252	EFHD1	circRNA	chr2	233547098	233547119	+	4	0	AGO1,AGO1-4,AGO2	7mer-m8	ggaguaccuucccAAGGGGUGa	ccagcucagccuuUUCCCCACu
MIMAT0002807	hsa-miR-491-5p	NM_018218	USP40	circRNA	chr2	234442251	234442272	-	1	0	AGO2	7mer-m8	ggaguaccuucccaAGGGGUGa	aauagcaucuccugUCCCCACu
MIMAT0002807	hsa-miR-491-5p	NM_004369	COL6A3	circRNA	chr2	238253087	238253109	-	1	0	AGO1-4	8mer	ggaguaccUUC-CCAAGGGGUGa	acacccacAAGAGCAUCCCCACa
MIMAT0002807	hsa-miR-491-5p	NM_004369	COL6A3	circRNA	chr2	238277565	238277585	-	2	0	AGO1-4	7mer-m8	ggAGUACCUUCCCAAGGGGUGa	gcUCA-GAGGGGGGUCCCCACu
MIMAT0002807	hsa-miR-491-5p	NM_018226	RNPEPL1	circRNA	chr2	241517489	241517512	+	2	0	AGO1-4,AGO2	7mer-m8	ggaGUACCU--UCCCAAGGGGUGa	accUGUGGACCUGGCCUCCCCACu
MIMAT0002807	hsa-miR-491-5p	NM_014808	FARP2	circRNA	chr2	242404696	242404717	+	1	0	AGO1-4	8mer	ggAGUACCUUCCCAAGGGGUGa	ccUCAGAUCAGGGUUCCCCACa
MIMAT0002807	hsa-miR-491-5p	NM_152783	D2HGDH	circRNA	chr2	242691003	242691024	+	1	0	AGO1-4	7mer-m8	ggaguaccuucccaAGGGGUGa	uaaaaaguacuuccUCCCCACc
MIMAT0002807	hsa-miR-491-5p	NM_152783	D2HGDH	circRNA	chr2	242694740	242694761	+	1	0	AGO1-4	7mer-m8	ggaguaccuucccaAGGGGUGa	gggcccugcuguugUCCCCACu
MIMAT0002807	hsa-miR-491-5p	NM_182760	SUMF1	circRNA	chr3	4212173	4212194	-	1	0	AGO2	7mer-m8	ggaguaccuucccAAGGGGUGa	cugcccuuccuuaUUCCCCACu
MIMAT0002807	hsa-miR-491-5p	NM_182760	SUMF1	circRNA	chr3	4393376	4393397	-	1	0	AGO1-4	7mer-m8	ggaguaccuucccaAGGGGUGa	ccaucacaccucccUCCCCACc
MIMAT0002807	hsa-miR-491-5p	NM_003670	BHLHE40	circRNA	chr3	5025660	5025681	+	1	0	AGO1-4	7mer-m8	ggaguaccuucccAAGGGGUGa	gacgucugggcuuUUCCCCACc
MIMAT0002807	hsa-miR-491-5p	NM_001018115	FANCD2	circRNA	chr3	10068289	10068309	+	1	0	AGO1-4	8mer	ggagUACCUUCCCAAGGGGUGa	ugagAUGGGA-UAAUCCCCACa
MIMAT0002807	hsa-miR-491-5p	NM_018462	BRK1	circRNA	chr3	10168365	10168386	+	14	1	AGO1-4,AGO2	7mer-m8	ggaguaccuucccaAGGGGUGa	cagucuuugucuccUCCCCACc
MIMAT0002807	hsa-miR-491-5p	NM_014760	TATDN2	circRNA	chr3	10291123	10291144	+	2	0	AGO1-4	8mer	ggaguaccuucccaAGGGGUGa	ccuccuccuccuucUCCCCACa
MIMAT0002807	hsa-miR-491-5p	NR_024272	SEC13	circRNA	chr3	10342917	10342940	-	7	1	AGO1,AGO1-4	7mer-m8	ggagUACCUU--CCCAAGGGGUGa	acagGUGGGGCCUGGCUCCCCACc
MIMAT0002807	hsa-miR-491-5p	NM_006395	ATG7	circRNA	chr3	11476200	11476221	+	2	0	AGO1-4	7mer-m8	ggAGUACCUUCCCAAGGGGUGa	agUCUGGGCAGAGUUCCCCACc
MIMAT0002807	hsa-miR-491-5p	NM_006395	ATG7	circRNA	chr3	11509862	11509883	+	1	0	AGO1-4	7mer-m8	ggaguaccuucccaAGGGGUGa	cucgccuauccuccUCCCCACu
MIMAT0002807	hsa-miR-491-5p	NM_006395	ATG7	circRNA	chr3	11510036	11510057	+	1	0	AGO1-4	8mer	ggaguaccuuccCAAGGGGUGa	auuagcccucucGAUCCCCACa
MIMAT0002807	hsa-miR-491-5p	NM_006395	ATG7	circRNA	chr3	11517471	11517492	+	1	0	AGO2	8mer	ggaguaccuucccAAGGGGUGa	gcugugauuuuauUUCCCCACa
MIMAT0002807	hsa-miR-491-5p	NM_001145395	TSEN2	circRNA	chr3	12581007	12581028	+	1	0	AGO1-4	7mer-m8	ggaguaccuucccaAGGGGUGa	uugcugucuucacaUCCCCACu
MIMAT0002807	hsa-miR-491-5p	NM_002880	RAF1	circRNA	chr3	12625782	12625803	-	3	0	AGO1-4,AGO2	8mer	ggaguaccuucccaAGGGGUGa	uguguccugcucccUCCCCACa
MIMAT0002807	hsa-miR-491-5p	NM_003298	NR2C2	circRNA	chr3	15045420	15045441	+	2	0	AGO2	7mer-m8	ggaguaccuucccaAGGGGUGa	ggaugaccagccccUCCCCACg
MIMAT0002807	hsa-miR-491-5p	NM_022340	ZFYVE20	circRNA	chr3	15114170	15114193	-	1	0	AGO2	7mer-m8	ggAGUAC-CUUC-CCAAGGGGUGa	auUUGUGAGAAGAGUUUCCCCACc
MIMAT0002807	hsa-miR-491-5p	NM_001134381	TBC1D5	circRNA	chr3	17199137	17199158	-	1	0	AGO1-4	8mer	ggaguaccuuccCAAGGGGUGa	acggaggacuuaGGUCCCCACa
MIMAT0002807	hsa-miR-491-5p	NM_014744	TBC1D5	circRNA	chr3	17199137	17199158	-	1	0	AGO1-4	8mer	ggaguaccuuccCAAGGGGUGa	acggaggacuuaGGUCCCCACa
MIMAT0002807	hsa-miR-491-5p	NM_001134381	TBC1D5	circRNA	chr3	17202576	17202597	-	3	0	AGO1-4	7mer-m8	ggaguaccuuccCAAGGGGUGa	aggccccagucuGCUCCCCACu
MIMAT0002807	hsa-miR-491-5p	NM_014744	TBC1D5	circRNA	chr3	17202576	17202597	-	3	0	AGO1-4	7mer-m8	ggaguaccuuccCAAGGGGUGa	aggccccagucuGCUCCCCACu
MIMAT0002807	hsa-miR-491-5p	NM_001003792	RBMS3	circRNA	chr3	29476237	29476258	+	1	0	AGO2	7mer-m8	ggaGUACCUUCCCAAGGGGUGa	uccUAUGCACCAGCUCCCCACc
MIMAT0002807	hsa-miR-491-5p	NM_001003793	RBMS3	circRNA	chr3	29476237	29476258	+	1	0	AGO2	7mer-m8	ggaGUACCUUCCCAAGGGGUGa	uccUAUGCACCAGCUCCCCACc
MIMAT0002807	hsa-miR-491-5p	NM_017784	OSBPL10	circRNA	chr3	31703032	31703053	-	1	0	AGO2	7mer-m8	ggaguaccuucccaAGGGGUGa	gauucucaccucccUCCCCACc
MIMAT0002807	hsa-miR-491-5p	NM_017784	OSBPL10	circRNA	chr3	31921192	31921210	-	1	0	AGO1-4	8mer	ggagUACCUUCCCAAGGGGUGa	agcgAU-GAA--GCUCCCCACa
MIMAT0002807	hsa-miR-491-5p	NM_015141	GPD1L	circRNA	chr3	32180124	32180145	+	3	0	AGO1-4	7mer-m8	ggaguaccuucccAAGGGGUGa	cugguguuugucaUUCCCCACc
MIMAT0002807	hsa-miR-491-5p	NM_001128161	UBP1	circRNA	chr3	33444320	33444341	-	5	1	AGO1-4,AGO2	8mer	ggaguaccuucccaAGGGGUGa	cgcccacuuucaccUCCCCACa
MIMAT0002807	hsa-miR-491-5p	NM_014517	UBP1	circRNA	chr3	33444320	33444341	-	5	1	AGO1-4,AGO2	8mer	ggaguaccuucccaAGGGGUGa	cgcccacuuucaccUCCCCACa
MIMAT0002807	hsa-miR-491-5p	NR_024024	ACAA1	circRNA	chr3	38167867	38167888	-	1	0	AGO2	7mer-m8	ggaguaccuucccaAGGGGUGa	cugggaucuccucaUCCCCACc
MIMAT0002807	hsa-miR-491-5p	NM_005109	OXSR1	circRNA	chr3	38295788	38295808	+	5	0	AGO1-4,AGO2	8mer	ggAGUACCUUCCCAAGGGGUGa	uaUC-UGAAAACCUUCCCCACa
MIMAT0002807	hsa-miR-491-5p	NM_001042646	TRAK1	circRNA	chr3	42264730	42264751	+	1	0	AGO2	7mer-m8	ggaguaccuucccaAGGGGUGa	agacacccacauccUCCCCACc
MIMAT0002807	hsa-miR-491-5p	NM_016598	ZDHHC3	circRNA	chr3	44960207	44960228	-	1	0	AGO2	8mer	ggaguaccuucccaAGGGGUGa	agcccagccuuaccUCCCCACa
MIMAT0002807	hsa-miR-491-5p	NM_016598	ZDHHC3	circRNA	chr3	44967100	44967121	-	6	0	AGO1-4,AGO2	7mer-m8	ggaguaccuucccaAGGGGUGa	ggguuaccucacagUCCCCACc
MIMAT0002807	hsa-miR-491-5p	NM_016598	ZDHHC3	circRNA	chr3	44968011	44968032	-	4	0	AGO1-4,AGO2	8mer	ggaguaccuucccaAGGGGUGa	gagaaaaaaaaaagUCCCCACa
MIMAT0002807	hsa-miR-491-5p	NM_016598	ZDHHC3	circRNA	chr3	45000911	45000932	-	6	0	AGO1-4,AGO2	7mer-m8	ggAGUACCUUCCCA-AGGGGUGa	gcUUAU-GAUGCUUAUCCCCACc
MIMAT0002807	hsa-miR-491-5p	NM_015175	NBEAL2	circRNA	chr3	47043553	47043573	+	2	0	AGO2	7mer-m8	ggaguaCCUUCCCAAGGGGUGa	ugaugaGGCAGGG-UCCCCACu
MIMAT0002807	hsa-miR-491-5p	NM_014159	SETD2	circRNA	chr3	47165728	47165751	-	2	0	AGO1-4,AGO2	7mer-m8	ggaguacCUUC--CCAAGGGGUGa	uacugcaGAAGAAUCUUCCCCACc
MIMAT0002807	hsa-miR-491-5p	NM_025010	KLHL18	circRNA	chr3	47386539	47386558	+	6	0	AGO2	7mer-m8	ggAGUACCUUCCCAAGGGGUGa	gcUCAUUCA--GAUUCCCCACu
MIMAT0002807	hsa-miR-491-5p	NM_003074	SMARCC1	circRNA	chr3	47629558	47629579	-	7	0	AGO1-4,AGO2	7mer-m8	ggaguaccuucccaAGGGGUGa	acgugucccgugccUCCCCACu
MIMAT0002807	hsa-miR-491-5p	NM_002673	PLXNB1	circRNA	chr3	48461611	48461632	-	1	0	AGO2	7mer-m8	ggaguaccuucccaAGGGGUGa	guggacccagccccUCCCCACc
MIMAT0002807	hsa-miR-491-5p	NM_016453	NCKIPSD	circRNA	chr3	48711639	48711660	-	2	0	AGO2	7mer-m8	ggaguaccuucccaAGGGGUGa	ggaccagacccccaUCCCCACc
MIMAT0002807	hsa-miR-491-5p	NM_017730	QRICH1	circRNA	chr3	49095268	49095289	-	9	0	AGO1,AGO1-4,AGO2	8mer	ggaguaccuUCCCAAGGGGUGa	ucucggcucAGCUCUCCCCACa
MIMAT0002807	hsa-miR-491-5p	NM_001199161	USP19	circRNA	chr3	49153297	49153317	-	1	0	AGO2	7mer-m8	ggaGUACCUUCCCAAGGGGUGa	cacCA-GGAGGUGCUCCCCACc
MIMAT0002807	hsa-miR-491-5p	NM_003363	USP4	circRNA	chr3	49314784	49314805	-	1	0	AGO2	7mer-m8	ggaguaccuucccaAGGGGUGa	auucgaaagccccgUCCCCACu
MIMAT0002807	hsa-miR-491-5p	NM_000581	GPX1	circRNA	chr3	49394634	49394655	-	14	0	AGO1-4,AGO2	7mer-m8	ggaGUACCUUCCCAAGGGGUGa	gacCAAGGCGAGUUUCCCCACu
MIMAT0002807	hsa-miR-491-5p	NM_201397	GPX1	circRNA	chr3	49394634	49394655	-	14	0	AGO1-4,AGO2	7mer-m8	ggaGUACCUUCCCAAGGGGUGa	gacCAAGGCGAGUUUCCCCACu
MIMAT0002807	hsa-miR-491-5p	NM_022171	TCTA	circRNA	chr3	49453478	49453499	+	1	0	AGO1-4	7mer-m8	ggaguaccuucccaAGGGGUGa	acaggcucagcuccUCCCCACu
MIMAT0002807	hsa-miR-491-5p	NM_004186	SEMA3F	circRNA	chr3	50197099	50197121	+	1	0	AGO2	7mer-m8	ggaGUACC-UUCCCAAGGGGUGa	gggCCUGGCCAUCCUUCCCCACc
MIMAT0002807	hsa-miR-491-5p	NM_002070	GNAI2	circRNA	chr3	50293651	50293672	+	10	0	AGO1,AGO1-4,AGO2	8mer	ggaguaccuucccaAGGGGUGa	acagagugacuacaUCCCCACa
MIMAT0002807	hsa-miR-491-5p	NM_014703	VPRBP	circRNA	chr3	51457419	51457440	-	2	0	AGO1-4,AGO2	7mer-m8	ggaguaccuucccAAGGGGUGa	acagacaucuuccUUCCCCACc
MIMAT0002807	hsa-miR-491-5p	NM_001146314	ABHD14B	circRNA	chr3	52003050	52003071	-	2	1	AGO1-4,AGO2	7mer-m8	ggaguaccuucccAAGGGGUGa	ccccaacacccacUUCCCCACc
MIMAT0002807	hsa-miR-491-5p	NM_032750	ABHD14B	circRNA	chr3	52003050	52003071	-	2	1	AGO1-4,AGO2	7mer-m8	ggaguaccuucccAAGGGGUGa	ccccaacacccacUUCCCCACc
MIMAT0002807	hsa-miR-491-5p	NM_007184	NISCH	circRNA	chr3	52510531	52510552	+	2	0	AGO1,AGO1-4	7mer-m8	ggaguaccuucccaAGGGGUGa	ugugacugccgucaUCCCCACu
MIMAT0002807	hsa-miR-491-5p	NM_001135055	TKT	circRNA	chr3	53263092	53263116	-	5	1	AGO1-4,AGO2	8mer	ggaGUACCUUCCCA---AGGGGUGa	ggcUAUGUUUCGGUCAGUCCCCACa
MIMAT0002807	hsa-miR-491-5p	NM_002841	PTPRG	circRNA	chr3	61601206	61601226	+	2	0	AGO1-4,AGO2	7mer-m8	ggAGUACCUUCCCAAGGGGUGa	caUC-UGCCAGGCUUCCCCACu
MIMAT0002807	hsa-miR-491-5p	NM_173654	C3orf64	circRNA	chr3	69041224	69041244	-	1	0	AGO1-4	7mer-m8	ggaguACCUUCCCAAGGGGUGa	ugguuUGGCUGUG-UCCCCACc
MIMAT0002807	hsa-miR-491-5p	NM_000248	MITF	circRNA	chr3	70014223	70014243	+	2	0	AGO1-4	8mer	ggaguaccuUCCCAAGGGGUGa	caagccuauAGUG-UCCCCACa
MIMAT0002807	hsa-miR-491-5p	NM_002941	ROBO1	circRNA	chr3	78676543	78676564	-	1	0	AGO1-4	8mer	ggaguaccuucccaAGGGGUGa	ccacucugacucccUCCCCACa
MIMAT0002807	hsa-miR-491-5p	NM_001042533	MINA	circRNA	chr3	97663527	97663548	-	1	0	AGO2	8mer	ggAGUACCUUCCCAAGGGGUGa	uaUUAAAUAAUACUUCCCCACa
MIMAT0002807	hsa-miR-491-5p	NM_001777	CD47	circRNA	chr3	107799001	107799022	-	1	0	AGO1-4	7mer-m8	ggaguaccuucccaAGGGGUGa	aaacaaguccacugUCCCCACu
MIMAT0002807	hsa-miR-491-5p	NM_001243288	PVRL3	circRNA	chr3	110866284	110866306	+	2	1	AGO2	7mer-m8	ggaGUACCU-UCCCAAGGGGUGa	cugUAUGAAGAACGAUCCCCACc
MIMAT0002807	hsa-miR-491-5p	NM_001134438	PHLDB2	circRNA	chr3	111671498	111671519	+	1	0	AGO2	8mer	ggaguaccuucccaAGGGGUGa	ccacaucuuccaucUCCCCACa
MIMAT0002807	hsa-miR-491-5p	NM_001009899	KIAA2018	circRNA	chr3	113375854	113375875	-	2	0	AGO1-4	7mer-m8	ggaguaccuucccaAGGGGUGa	acuggccagccacaUCCCCACc
MIMAT0002807	hsa-miR-491-5p	NM_018266	TMEM39A	circRNA	chr3	119156746	119156767	-	6	0	AGO1-4,AGO2	7mer-m8	ggaguaccuucccaAGGGGUGa	uaaugccacacccaUCCCCACc
MIMAT0002807	hsa-miR-491-5p	NM_006810	PDIA5	circRNA	chr3	122842969	122842990	+	2	0	AGO1-4,AGO2	7mer-m8	ggaGUACCUUCCCAAGGGGUGa	cagCGUGCGCGGCUUCCCCACc
MIMAT0002807	hsa-miR-491-5p	NM_053025	MYLK	circRNA	chr3	123452691	123452712	-	1	0	AGO1-4	7mer-m8	ggaguaccuucccAAGGGGUGa	ccguccagccaccUUCCCCACc
MIMAT0002807	hsa-miR-491-5p	NM_001040653	ZXDC	circRNA	chr3	126175773	126175796	-	3	0	AGO1-4,AGO2	8mer	ggaguacCUUCCC--AAGGGGUGa	cggggguGAGGUGCCCUCCCCACa
MIMAT0002807	hsa-miR-491-5p	NM_032242	PLXNA1	circRNA	chr3	126708015	126708036	+	1	0	AGO1-4	8mer	ggaguacCUUCCCAAGGGGUGa	caaguccGAGUACUUCCCCACa
MIMAT0002807	hsa-miR-491-5p	NM_032242	PLXNA1	circRNA	chr3	126736476	126736497	+	2	0	AGO2	7mer-m8	ggaguaccuuccCAAGGGGUGa	agcugaagcccaGCUCCCCACu
MIMAT0002807	hsa-miR-491-5p	NM_032242	PLXNA1	circRNA	chr3	126753717	126753743	+	3	0	AGO1-4,AGO2	7mer-m8	ggAGUACCU-UCC----CAAGGGGUGa	cuUCAAGGGUAGGCUGAGCUCCCCACc
MIMAT0002807	hsa-miR-491-5p	NM_004526	MCM2	circRNA	chr3	127341191	127341212	+	11	1	AGO1,AGO1-4,AGO2	7mer-m8	ggaguaccuucCCAAGGGGUGa	gcucccugucuGUUUCCCCACu
MIMAT0002807	hsa-miR-491-5p	NM_007283	MGLL	circRNA	chr3	127411045	127411066	-	1	0	AGO1-4	7mer-m8	ggaGUACCUU-CCCAAGGGGUGa	cggCA-GGAACUGCGUCCCCACc
MIMAT0002807	hsa-miR-491-5p	NM_013336	SEC61A1	circRNA	chr3	127788319	127788331	+	2	0	AGO1-4	8mer	ggaguaccuucccaAGGGGUGa	#NAME?
MIMAT0002807	hsa-miR-491-5p	NM_013336	SEC61A1	circRNA	chr3	127788828	127788849	+	19	0	AGO1-4,AGO2	8mer	ggaguaccuucCCAAGGGGUGa	ccgucucaccuGUUUCCCCACa
MIMAT0002807	hsa-miR-491-5p	NM_003707	RUVBL1	circRNA	chr3	127799993	127800014	-	1	0	AGO1-4	7mer-m8	ggAGUACCUUCCCAAGGGGUGa	gcUUGGGGCUGCCGUCCCCACu
MIMAT0002807	hsa-miR-491-5p	NM_002950	RPN1	circRNA	chr3	128372872	128372893	-	1	0	AGO1-4	7mer-m8	ggaguaccuucccaAGGGGUGa	aaagguucuccaagUCCCCACc
MIMAT0002807	hsa-miR-491-5p	NM_002950	RPN1	circRNA	chr3	128372922	128372943	-	2	0	AGO1-4	7mer-m8	ggaguaccuucccaAGGGGUGa	aaagguucuccacgUCCCCACu
MIMAT0002807	hsa-miR-491-5p	NM_004637	RAB7A	circRNA	chr3	128533410	128533431	+	1	0	AGO1-4	7mer-m8	ggaguaccuucccAAGGGGUGa	gcuuuuuccucuuUUCCCCACc
MIMAT0002807	hsa-miR-491-5p	NM_021203	SRPRB	circRNA	chr3	133539100	133539119	+	1	0	AGO2	8mer	ggAGUACCUUCCCAAGGGGUGa	agUUAU-GAA-GUUUCCCCACa
MIMAT0002807	hsa-miR-491-5p	NM_001242375	ANAPC13	circRNA	chr3	134197020	134197041	-	4	0	AGO1-4,AGO2	8mer	ggaguaccuucccAAGGGGUGa	uaacuucucauacUUCCCCACa
MIMAT0002807	hsa-miR-491-5p	NM_022131	CLSTN2	circRNA	chr3	140123517	140123543	+	1	0	AGO2	8mer	ggaGUACCU--UCC---CAAGGGGUGa	ggcCAUUGACGAGGACUGCUCCCCACa
MIMAT0002807	hsa-miR-491-5p	NM_080862	SPSB4	circRNA	chr3	140867355	140867376	+	1	0	AGO1-4	7mer-m8	ggaguaccuucccaAGGGGUGa	gcacugccucuuccUCCCCACc
MIMAT0002807	hsa-miR-491-5p	NM_006506	RASA2	circRNA	chr3	141223665	141223686	+	1	0	AGO1-4	7mer-m8	ggaguaccuucccaAGGGGUGa	cuaucuccucccucUCCCCACu
MIMAT0002807	hsa-miR-491-5p	NM_001184	ATR	circRNA	chr3	142285013	142285033	-	1	0	AGO1-4	7mer-m8	ggAGUACCUUCCCAAGGGGUGa	uaUCAU-GAAAUCCUCCCCACu
MIMAT0002807	hsa-miR-491-5p	NM_015472	WWTR1	circRNA	chr3	149243843	149243865	-	2	0	AGO1-4,AGO2	8mer	ggagUACCUUCCCA-AGGGGUGa	uaggGUGCUACAGUGUCCCCACa
MIMAT0002807	hsa-miR-491-5p	NM_024947	PHC3	circRNA	chr3	169812535	169812556	-	2	0	AGO2	7mer-m8	ggaguaccuucccaAGGGGUGa	ccagaucucuguugUCCCCACu
MIMAT0002807	hsa-miR-491-5p	NM_002740	PRKCI	circRNA	chr3	170022070	170022094	+	1	0	AGO2	8mer	ggaGUACCUUCCCA---AGGGGUGa	uccUAUUGGAGAGUGAAUCCCCACa
MIMAT0002807	hsa-miR-491-5p	NM_001135095	FNDC3B	circRNA	chr3	171965527	171965548	+	4	0	AGO1-4,AGO2	8mer	ggaguaccuucccAAGGGGUGa	ccccagcaucaucUUCCCCACa
MIMAT0002807	hsa-miR-491-5p	NM_022763	FNDC3B	circRNA	chr3	171965527	171965548	+	4	0	AGO1-4,AGO2	8mer	ggaguaccuucccAAGGGGUGa	ccccagcaucaucUUCCCCACa
MIMAT0002807	hsa-miR-491-5p	hsa_circ_0001362	hsa_circ_001829	circRNA	chr3	171965527	171965548	+	4	0	AGO1-4,AGO2	8mer	ggaguaccuucccAAGGGGUGa	ccccagcaucaucUUCCCCACa
MIMAT0002807	hsa-miR-491-5p	NM_024665	TBL1XR1	circRNA	chr3	176816271	176816292	-	9	0	AGO1,AGO2	8mer	ggaguaccuucccaAGGGGUGa	uauucaguugcacaUCCCCACa
MIMAT0002807	hsa-miR-491-5p	NM_024665	TBL1XR1	circRNA	chr3	176861706	176861730	-	4	0	AGO1-4,AGO2	7mer-m8	ggaguACCUUC-CCA--AGGGGUGa	acuguUAGAAGCAGUCAUCCCCACu
MIMAT0002807	hsa-miR-491-5p	NM_024665	TBL1XR1	circRNA	chr3	176888366	176888387	-	1	0	AGO1-4	7mer-m8	ggaguaccuucccaAGGGGUGa	gaaagaccuuuuucUCCCCACc
MIMAT0002807	hsa-miR-491-5p	NM_015078	MCF2L2	circRNA	chr3	183016791	183016812	-	1	0	AGO1-4	8mer	ggaguaccuucccaAGGGGUGa	gucagcaugcuccaUCCCCACa
MIMAT0002807	hsa-miR-491-5p	NM_004068	AP2M1	circRNA	chr3	183898749	183898770	+	5	2	AGO1-4	8mer	ggaguaccuucccaAGGGGUGa	ugaaccugcucaugUCCCCACa
MIMAT0002807	hsa-miR-491-5p	NM_021627	SENP2	circRNA	chr3	185348631	185348652	+	1	0	AGO1-4	7mer-m8	ggaguaccuucccaAGGGGUGa	uuaagacuaacaucUCCCCACu
MIMAT0002807	hsa-miR-491-5p	NM_018385	LSG1	circRNA	chr3	194369449	194369471	-	4	0	AGO1,AGO1-4,AGO2	7mer-m8	ggaguaCCUUC-CCAAGGGGUGa	uagagaGGAUGAAGAUCCCCACc
MIMAT0002807	hsa-miR-491-5p	NM_006241	PPP1R2	circRNA	chr3	195243071	195243092	-	1	0	AGO2	8mer	ggaguaccuucccAAGGGGUGa	aaaacuagcuuuuUUCCCCACa
MIMAT0002807	hsa-miR-491-5p	NR_003264	SDHAP1	circRNA	chr3	195702621	195702642	-	2	1	AGO1-4	7mer-m8	ggaguaccuucccaAGGGGUGa	gccgaucccuguccUCCCCACc
MIMAT0002807	hsa-miR-491-5p	NM_005017	PCYT1A	circRNA	chr3	195965629	195965650	-	4	0	AGO1-4	7mer-m8	ggAGUACCUUCCCAAGGGGUGa	ucUCCGGCAAGACUUCCCCACc
MIMAT0002807	hsa-miR-491-5p	NM_015562	UBXN7	circRNA	chr3	196089336	196089357	-	2	0	AGO1,AGO1-4	8mer	ggaguacCUUCCCAAGGGGUGa	aaguccaGAAAGUCUCCCCACa
MIMAT0002807	hsa-miR-491-5p	NM_004087	DLG1	circRNA	chr3	196921408	196921430	-	1	0	AGO1-4	8mer	ggAGUAC-CUUCCCAAGGGGUGa	ccUCAAGAGCAUAUUUCCCCACa
MIMAT0002807	hsa-miR-491-5p	NM_001039127	ZNF718	circRNA	chr4	132032	132053	+	1	0	AGO1-4	7mer-m8	ggaguaccuucccAAGGGGUGa	cuacccauuaaucUUCCCCACu
MIMAT0002807	hsa-miR-491-5p	NM_001137608	ZNF732	circRNA	chr4	297679	297700	-	1	0	AGO1-4	7mer-m8	ggaguaccuucccaAGGGGUGa	ucaguccugcccugUCCCCACc
MIMAT0002807	hsa-miR-491-5p	NM_005255	GAK	circRNA	chr4	843391	843414	-	1	0	AGO1-4	7mer-m8	ggAGUACCUU--CCCAAGGGGUGa	cgUCGUGGGACCUGGGUCCCCACc
MIMAT0002807	hsa-miR-491-5p	NM_001004356	FGFRL1	circRNA	chr4	1020366	1020392	+	3	0	AGO1-4,AGO2	7mer-m8	ggaGUACC--UU-CCCA--AGGGGUGa	gccCAUGGCUAGUGGCUCAUCCCCACu
MIMAT0002807	hsa-miR-491-5p	NM_001163213	FGFR3	circRNA	chr4	1809459	1809481	+	9	0	AGO1-4,AGO2	7mer-m8	ggAGUACC-UUCCCAAGGGGUGa	guUAGUGGCACCGCCUCCCCACc
MIMAT0002807	hsa-miR-491-5p	NM_012318	LETM1	circRNA	chr4	1825467	1825487	-	3	0	AGO1,AGO2	8mer	ggaGUACCUUCCCAAGGGGUGa	cugCAU-CAGGAGAUCCCCACa
MIMAT0002807	hsa-miR-491-5p	NM_001042424	WHSC1	circRNA	chr4	1980767	1980788	+	5	0	AGO1-4,AGO2	7mer-m8	ggagUACCUUCCCAAGGGGUGa	cgggAGGGAGCGCCUCCCCACc
MIMAT0002807	hsa-miR-491-5p	NM_133330	WHSC1	circRNA	chr4	1980767	1980788	+	5	0	AGO1-4,AGO2	7mer-m8	ggagUACCUUCCCAAGGGGUGa	cgggAGGGAGCGCCUCCCCACc
MIMAT0002807	hsa-miR-491-5p	NM_001042424	WHSC1	circRNA	chr4	1982651	1982671	+	3	0	AGO1-4,AGO2	8mer	ggaguaCCUUCCCAAGGGGUGa	aggccgGGCAGUG-UCCCCACa
MIMAT0002807	hsa-miR-491-5p	NM_001172657	ZFYVE28	circRNA	chr4	2332566	2332587	-	1	0	AGO1-4	7mer-m8	ggaguaccuucccaAGGGGUGa	uccucucuccccagUCCCCACg
MIMAT0002807	hsa-miR-491-5p	NM_176801	ADD1	circRNA	chr4	2906606	2906627	+	1	0	AGO1-4	7mer-m8	ggAGUACCUUCCCAAGGGGUGa	auUCGGGCACUUGCUCCCCACu
MIMAT0002807	hsa-miR-491-5p	NM_176801	ADD1	circRNA	chr4	2930471	2930494	+	3	0	AGO1-4,AGO2	8mer	ggaguacCU-UCCCA-AGGGGUGa	ugggggaGACAUGCUCUCCCCACa
MIMAT0002807	hsa-miR-491-5p	NM_002111	HTT	circRNA	chr4	3243765	3243786	+	1	0	AGO2	7mer-m8	ggaguaccuuccCAAGGGGUGa	gaacuguuggcuGCUCCCCACc
MIMAT0002807	hsa-miR-491-5p	NM_002926	RGS12	circRNA	chr4	3432246	3432267	+	1	0	AGO1-4	7mer-m8	ggaguaccuucccaAGGGGUGa	cacagaacucacccUCCCCACu
MIMAT0002807	hsa-miR-491-5p	NM_198229	RGS12	circRNA	chr4	3432246	3432267	+	1	0	AGO1-4	7mer-m8	ggaguaccuucccaAGGGGUGa	cacagaacucacccUCCCCACu
MIMAT0002807	hsa-miR-491-5p	NM_001528	HGFAC	circRNA	chr4	3444491	3444512	+	1	0	AGO1-4	7mer-m8	ggaguaccuuCCCAAGGGGUGa	agcgaccccuGCGAUCCCCACu
MIMAT0002807	hsa-miR-491-5p	NM_153717	EVC	circRNA	chr4	5815902	5815923	+	1	0	AGO2	7mer-m8	ggaguaccuucccaAGGGGUGa	cauuuugguuaccaUCCCCACu
MIMAT0002807	hsa-miR-491-5p	NM_006005	WFS1	circRNA	chr4	6302464	6302485	+	1	1	AGO2	7mer-m8	ggaguaccuucccaAGGGGUGa	gcuguccaccaucaUCCCCACg
MIMAT0002807	hsa-miR-491-5p	NM_152293	TADA2B	circRNA	chr4	7056842	7056865	+	1	0	AGO1-4	7mer-m8	ggagUACCUUC--CCAAGGGGUGa	ggggAGGGGAGCCGCUUCCCCACu
MIMAT0002807	hsa-miR-491-5p	NM_152293	TADA2B	circRNA	chr4	7057531	7057552	+	2	0	AGO2	7mer-m8	ggaguaccuucccaAGGGGUGa	ccauagugaccacgUCCCCACg
MIMAT0002807	hsa-miR-491-5p	NM_004787	SLIT2	circRNA	chr4	20493475	20493496	+	3	0	AGO1-4	8mer	ggaguaccuuCCCAAGGGGUGa	aggucucacuGAGAUCCCCACa
MIMAT0002807	hsa-miR-491-5p	NM_004787	SLIT2	circRNA	chr4	20544123	20544144	+	4	0	AGO1-4,AGO2	7mer-m8	ggaguaccuuccCAAGGGGUGa	augacaauaguuGCUCCCCACu
MIMAT0002807	hsa-miR-491-5p	NM_015230	ARAP2	circRNA	chr4	36230644	36230667	-	2	0	AGO2	7mer-m8	ggAGUACCUUCCC--AAGGGGUGa	ccUCCUAAACGCGACUUCCCCACu
MIMAT0002807	hsa-miR-491-5p	NM_001100399	PDS5A	circRNA	chr4	39825341	39825362	-	2	0	AGO1-4,AGO2	7mer-m8	ggaguaccuucccaAGGGGUGa	caggggcagaaaaaUCCCCACu
MIMAT0002807	hsa-miR-491-5p	NM_001134937	FIP1L1	circRNA	chr4	54327481	54327502	+	1	0	AGO2	8mer	ggaguaccuucccaAGGGGUGa	guacauacuuuuaaUCCCCACa
MIMAT0002807	hsa-miR-491-5p	NM_020722	KIAA1211	circRNA	chr4	57182577	57182598	+	1	0	AGO2	7mer-m8	ggaguaccuucccaAGGGGUGa	agaccccaccagcaUCCCCACu
MIMAT0002807	hsa-miR-491-5p	NM_002703	PPAT	circRNA	chr4	57261000	57261021	-	15	0	AGO1,AGO1-4,AGO2	8mer	ggaguaccuucCCAAGGGGUGa	cuggugccucaGUUUCCCCACa
MIMAT0002807	hsa-miR-491-5p	NM_032217	ANKRD17	circRNA	chr4	73941336	73941357	-	17	0	AGO1,AGO1-4,AGO2	8mer	ggAGUACCUUCCCAAGGGGUGa	uaUCAUUGGAUGUUUCCCCACa
MIMAT0002807	hsa-miR-491-5p	NM_032217	ANKRD17	circRNA	chr4	74041415	74041436	-	1	0	AGO1-4	7mer-m8	ggaguaccuucccAAGGGGUGa	aagagacuguucuUUCCCCACu
MIMAT0002807	hsa-miR-491-5p	NM_032217	ANKRD17	circRNA	chr4	74042299	74042320	-	1	0	AGO1-4	7mer-m8	ggaguaccuucccaAGGGGUGa	auacucauuaaccaUCCCCACu
MIMAT0002807	hsa-miR-491-5p	NM_001144978	MTHFD2L	circRNA	chr4	75097097	75097118	+	1	0	AGO1-4	8mer	ggaguaccuucccaAGGGGUGa	aaauagcuccaccaUCCCCACa
MIMAT0002807	hsa-miR-491-5p	NM_020859	SHROOM3	circRNA	chr4	77661109	77661130	+	3	0	AGO1-4,AGO2	8mer	ggaguaccuucccaAGGGGUGa	aaaccaucuucucaUCCCCACa
MIMAT0002807	hsa-miR-491-5p	NM_020859	SHROOM3	circRNA	chr4	77676272	77676293	+	1	0	AGO1-4	8mer	ggaguaccuucccaAGGGGUGa	uucccuccaccuccUCCCCACa
MIMAT0002807	hsa-miR-491-5p	NM_025074	FRAS1	circRNA	chr4	79373329	79373344	+	1	0	AGO2	7mer-m8	ggaguaccuucccaAGGGGUGa	#NAME?
MIMAT0002807	hsa-miR-491-5p	NM_014991	WDFY3	circRNA	chr4	85808425	85808446	-	1	0	AGO2	8mer	ggaguaccuucccAAGGGGUGa	ccuaacacucuucUUCCCCACa
MIMAT0002807	hsa-miR-491-5p	hsa_circ_0007305	hsa_circ_0007305	circRNA	chr4	87835325	87835347	-	2	0	AGO1-4	7mer-m8	ggAGUAC-CUUCCCAAGGGGUGa	acUUUUGUGAAGUAGUCCCCACu
MIMAT0002807	hsa-miR-491-5p	NM_014883	FAM13A	circRNA	chr4	89671596	89671622	-	1	1	AGO2	7mer-m8	ggaGUACCUUCCC-----AAGGGGUGa	ugaCACAGAAGUGCCUCCUUCCCCACc
MIMAT0002807	hsa-miR-491-5p	NM_006457	PDLIM5	circRNA	chr4	95586134	95586155	+	1	0	AGO1-4	7mer-m8	ggaguaccuucccAAGGGGUGa	cuuuucucauuucUUCCCCACc
MIMAT0002807	hsa-miR-491-5p	NM_001135147	SLC39A8	circRNA	chr4	103189035	103189058	-	2	0	AGO1-4,AGO2	7mer-m8	ggaGUAC-CUUC-CCAAGGGGUGa	uccUAUGUGAGGAGUUUCCCCACg
MIMAT0002807	hsa-miR-491-5p	NM_020116	FSTL5	circRNA	chr4	162307416	162307439	-	1	0	AGO2	8mer	ggaGUACCUUC--CCAAGGGGUGa	cagCACCGGAGCAGUUUCCCCACa
MIMAT0002807	hsa-miR-491-5p	NM_020870	SH3RF1	circRNA	chr4	170037486	170037507	-	4	0	AGO1-4,AGO2	8mer	ggaguaccuuCCCAAGGGGUGa	cguucucccuGGACUCCCCACa
MIMAT0002807	hsa-miR-491-5p	NM_020870	SH3RF1	circRNA	chr4	170077669	170077689	-	8	0	AGO1-4,AGO2	7mer-m8	ggaGUACCUUCCCAAGGGGUGa	aucCAUGG-CUUUUUCCCCACc
MIMAT0002807	hsa-miR-491-5p	NM_173872	CLCN3	circRNA	chr4	170565827	170565850	+	1	0	AGO1-4	8mer	ggaguaccUUCCC--AAGGGGUGa	ugcuuaauAAUGGCCAUCCCCACa
MIMAT0002807	hsa-miR-491-5p	NM_001145673	SORBS2	circRNA	chr4	186578590	186578613	-	1	0	AGO2	8mer	ggagUACCU--UCCCAAGGGGUGa	guggAUGAAUCCGGAAUCCCCACa
MIMAT0002807	hsa-miR-491-5p	NM_003603	SORBS2	circRNA	chr4	186578590	186578613	-	1	0	AGO2	8mer	ggagUACCU--UCCCAAGGGGUGa	guggAUGAAUCCGGAAUCCCCACa
MIMAT0002807	hsa-miR-491-5p	NM_004168	SDHA	circRNA	chr5	235388	235409	+	4	0	AGO1-4	7mer-m8	ggaguaccuucccaAGGGGUGa	gccgaucccuguccUCCCCACc
MIMAT0002807	hsa-miR-491-5p	NM_013232	PDCD6	circRNA	chr5	353822	353843	+	1	0	AGO1-4	8mer	ggaguaccuucccaAGGGGUGa	ugacccagaccaucUCCCCACa
MIMAT0002807	hsa-miR-491-5p	NM_013232	PDCD6	circRNA	chr5	401642	401661	+	1	0	AGO2	7mer-m8	ggAGUACCUUCCCAAGGGGUGa	ccUCGUGG--GUACUCCCCACg
MIMAT0002807	hsa-miR-491-5p	NM_007277	EXOC3	circRNA	chr5	454012	454033	+	2	0	AGO1-4	7mer-m8	ggaguaccuucccaAGGGGUGa	guucagugcuuuccUCCCCACu
MIMAT0002807	hsa-miR-491-5p	NM_001047	SRD5A1	circRNA	chr5	6669188	6669209	+	4	0	AGO1-4,AGO2	7mer-m8	ggaguaccuuccCAAGGGGUGa	uuuuuuuguucuGUUCCCCACg
MIMAT0002807	hsa-miR-491-5p	NM_007118	TRIO	circRNA	chr5	14239560	14239581	+	3	0	AGO1-4	7mer-m8	ggaguaccuucccaAGGGGUGa	aaauagcguucaucUCCCCACc
MIMAT0002807	hsa-miR-491-5p	NM_138348	FAM105B	circRNA	chr5	14699548	14699568	+	1	0	AGO1-4	7mer-m8	ggaGUACCUUCCCAAGGGGUGa	cagCA-GAAAGACCUCCCCACu
MIMAT0002807	hsa-miR-491-5p	NM_001040446	MTMR12	circRNA	chr5	32255847	32255868	-	1	0	AGO1-4	7mer-m8	ggaguaccuucccaAGGGGUGa	agcauacuuuguugUCCCCACc
MIMAT0002807	hsa-miR-491-5p	NM_175921	C5orf51	circRNA	chr5	41919018	41919039	+	2	0	AGO2	8mer	ggaguaccuucccAAGGGGUGa	cugucucucucauUUCCCCACa
MIMAT0002807	hsa-miR-491-5p	NM_016640	MRPS30	circRNA	chr5	44812040	44812058	+	6	0	AGO1-4,AGO2	7mer-m8	ggaGUACCUUCCCAAGGGGUGa	uccUAUAGAA---AUCCCCACu
MIMAT0002807	hsa-miR-491-5p	NM_001008397	GPX8	circRNA	chr5	54462024	54462044	+	1	0	AGO1	7mer-m8	ggaGUACCUUCCCAAGGGGUGa	gggCA-GCAGAGACUCCCCACu
MIMAT0002807	hsa-miR-491-5p	hsa_circ_0001488	hsa_circ_002002	circRNA	chr5	59106022	59106043	-	1	0	AGO2	7mer-m8	ggaguaccuucccAAGGGGUGa	uaggcggcccgccUUCCCCACg
MIMAT0002807	hsa-miR-491-5p	NM_014473	DIMT1	circRNA	chr5	61699673	61699694	-	1	0	AGO2	7mer-m8	ggaGUACCUUCCCAAGGGGUGa	gcgCGUGGCGGCGAUCCCCACg
MIMAT0002807	hsa-miR-491-5p	NM_181523	PIK3R1	circRNA	chr5	67594283	67594304	+	7	0	AGO1-4,AGO2	7mer-m8	ggAGUACCU-UCCCAAGGGGUGa	cuUCA-GAAUAAGCUUCCCCACc
MIMAT0002807	hsa-miR-491-5p	NM_001098728	GTF2H2C	circRNA	chr5	69210069	69210090	+	1	0	AGO1-4	7mer-m8	ggaguaccuUCCCAAGGGGUGa	ggugagccuGGGGGUCCCCACc
MIMAT0002807	hsa-miR-491-5p	NR_033417	GTF2H2B	circRNA	chr5	69210069	69210090	+	1	0	AGO1-4	7mer-m8	ggaguaccuUCCCAAGGGGUGa	ggugagccuGGGGGUCCCCACc
MIMAT0002807	hsa-miR-491-5p	TCONS_l2_00023407	TCONS_l2_00023407	circRNA	chr5	69210069	69210090	+	1	0	AGO1-4	7mer-m8	ggaguaccuUCCCAAGGGGUGa	ggugagccuGGGGGUCCCCACc
MIMAT0002807	hsa-miR-491-5p	hsa_circ_0004837	hsa_circ_0004837	circRNA	chr5	69210069	69210090	+	1	0	AGO1-4	7mer-m8	ggaguaccuUCCCAAGGGGUGa	ggugagccuGGGGGUCCCCACc
MIMAT0002807	hsa-miR-491-5p	hsa_circ_0072804	hsa_circ_0072804	circRNA	chr5	69210069	69210090	+	1	0	AGO1-4	7mer-m8	ggaguaccuUCCCAAGGGGUGa	ggugagccuGGGGGUCCCCACc
MIMAT0002807	hsa-miR-491-5p	hsa_circ_0072807	hsa_circ_0072807	circRNA	chr5	69210069	69210090	+	1	0	AGO1-4	7mer-m8	ggaguaccuUCCCAAGGGGUGa	ggugagccuGGGGGUCCCCACc
MIMAT0002807	hsa-miR-491-5p	hsa_circ_0072808	hsa_circ_0072808	circRNA	chr5	69210069	69210090	+	1	0	AGO1-4	7mer-m8	ggaguaccuUCCCAAGGGGUGa	ggugagccuGGGGGUCCCCACc
MIMAT0002807	hsa-miR-491-5p	hsa_circ_0072809	hsa_circ_0072809	circRNA	chr5	69210069	69210090	+	1	0	AGO1-4	7mer-m8	ggaguaccuUCCCAAGGGGUGa	ggugagccuGGGGGUCCCCACc
MIMAT0002807	hsa-miR-491-5p	NR_024054	LOC100170939	circRNA	chr5	69499687	69499708	-	1	0	AGO1-4	7mer-m8	ggaguaccuUCCCAAGGGGUGa	ggugagccuGGGGGUCCCCACc
MIMAT0002807	hsa-miR-491-5p	NR_029426	SMA4	circRNA	chr5	69499687	69499708	-	1	0	AGO1-4	7mer-m8	ggaguaccuUCCCAAGGGGUGa	ggugagccuGGGGGUCCCCACc
MIMAT0002807	hsa-miR-491-5p	NR_029426	SMA4	circRNA	chr5	69517737	69517758	-	1	0	AGO1-4	7mer-m8	ggaguaccuUCCCAAGGGGUGa	ggugagccuGGGGGUCCCCACc
MIMAT0002807	hsa-miR-491-5p	NR_034021	SMA5	circRNA	chr5	69517737	69517758	-	1	0	AGO1-4	7mer-m8	ggaguaccuUCCCAAGGGGUGa	ggugagccuGGGGGUCCCCACc
MIMAT0002807	hsa-miR-491-5p	NM_017411	SMN2	circRNA	chr5	70085119	70085140	+	1	0	AGO1-4	7mer-m8	ggaguaccuUCCCAAGGGGUGa	ggugagccuGGGGGUCCCCACc
MIMAT0002807	hsa-miR-491-5p	NR_033417	GTF2H2B	circRNA	chr5	70085119	70085140	+	1	0	AGO1-4	7mer-m8	ggaguaccuUCCCAAGGGGUGa	ggugagccuGGGGGUCCCCACc
MIMAT0002807	hsa-miR-491-5p	hsa_circ_0072846	hsa_circ_0072846	circRNA	chr5	70085119	70085140	+	1	0	AGO1-4	7mer-m8	ggaguaccuUCCCAAGGGGUGa	ggugagccuGGGGGUCCCCACc
MIMAT0002807	hsa-miR-491-5p	hsa_circ_0072848	hsa_circ_0072848	circRNA	chr5	70085119	70085140	+	1	0	AGO1-4	7mer-m8	ggaguaccuUCCCAAGGGGUGa	ggugagccuGGGGGUCCCCACc
MIMAT0002807	hsa-miR-491-5p	hsa_circ_0072849	hsa_circ_0072849	circRNA	chr5	70085119	70085140	+	1	0	AGO1-4	7mer-m8	ggaguaccuUCCCAAGGGGUGa	ggugagccuGGGGGUCCCCACc
MIMAT0002807	hsa-miR-491-5p	hsa_circ_0072850	hsa_circ_0072850	circRNA	chr5	70085119	70085140	+	1	0	AGO1-4	7mer-m8	ggaguaccuUCCCAAGGGGUGa	ggugagccuGGGGGUCCCCACc
MIMAT0002807	hsa-miR-491-5p	hsa_circ_0072851	hsa_circ_0072851	circRNA	chr5	70085119	70085140	+	1	0	AGO1-4	7mer-m8	ggaguaccuUCCCAAGGGGUGa	ggugagccuGGGGGUCCCCACc
MIMAT0002807	hsa-miR-491-5p	hsa_circ_0072852	hsa_circ_0072852	circRNA	chr5	70085119	70085140	+	1	0	AGO1-4	7mer-m8	ggaguaccuUCCCAAGGGGUGa	ggugagccuGGGGGUCCCCACc
MIMAT0002807	hsa-miR-491-5p	NM_018429	BDP1	circRNA	chr5	70806037	70806059	+	1	0	AGO2	8mer	ggAGUACCUUCCCA-AGGGGUGa	acUGAAAGAGAAGUAUCCCCACa
MIMAT0002807	hsa-miR-491-5p	NM_022132	MCCC2	circRNA	chr5	70953792	70953813	+	3	0	AGO1-4	7mer-m8	ggaguaccuucccAAGGGGUGa	cuauccccugaauUUCCCCACu
MIMAT0002807	hsa-miR-491-5p	NM_005909	MAP1B	circRNA	chr5	71493902	71493927	+	6	0	AGO1-4	8mer	ggaGUAC--CUUC--CCAAGGGGUGa	cugCAUGCUGAGGUUGGCUCCCCACa
MIMAT0002807	hsa-miR-491-5p	NM_005909	MAP1B	circRNA	chr5	71495728	71495749	+	5	0	AGO1-4,AGO2	8mer	ggaguaCCUUCCCAAGGGGUGa	cgagucGGAAACCAUCCCCACa
MIMAT0002807	hsa-miR-491-5p	NM_003633	ENC1	circRNA	chr5	73924821	73924842	-	4	2	AGO1-4,AGO2	7mer-m8	ggaguaccuucccaAGGGGUGa	gcuuucugcccuucUCCCCACu
MIMAT0002807	hsa-miR-491-5p	NM_014886	NSA2	circRNA	chr5	74069769	74069790	+	1	0	AGO2	7mer-m8	ggaguaccuucccaAGGGGUGa	agaagaaucccucaUCCCCACu
MIMAT0002807	hsa-miR-491-5p	NM_015566	FAM169A	circRNA	chr5	74148425	74148447	-	1	0	AGO1-4	7mer-m8	ggAGUACCUUCC-CAAGGGGUGa	ucUUUUUGAGGGUCUUCCCCACu
MIMAT0002807	hsa-miR-491-5p	NM_001099271	POC5	circRNA	chr5	74981177	74981198	-	1	0	AGO2	7mer-m8	ggaguaccuucccaAGGGGUGa	caccacugcugccaUCCCCACc
MIMAT0002807	hsa-miR-491-5p	NM_006633	IQGAP2	circRNA	chr5	76003795	76003816	+	2	0	AGO2	7mer-m8	ggAGUAC-CUUCCCAAGGGGUGa	gaUAGUGAGCAUAG-UCCCCACc
MIMAT0002807	hsa-miR-491-5p	NM_001992	F2R	circRNA	chr5	76029382	76029403	+	1	0	AGO2	7mer-m8	ggaguaccuucccaAGGGGUGa	gaggauucuauuagUCCCCACc
MIMAT0002807	hsa-miR-491-5p	NM_005779	LHFPL2	circRNA	chr5	77806098	77806119	-	3	0	AGO1-4,AGO2	7mer-m8	ggaguaccuucccAAGGGGUGa	cgcccgagccuccUUCCCCACc
MIMAT0002807	hsa-miR-491-5p	NM_001025	RPS23	circRNA	chr5	81571417	81571438	-	10	0	AGO1,AGO1-4,AGO2	7mer-m8	ggaguaccUUCCCAAGGGGUGa	aaacucaaAAUUGCUCCCCACu
MIMAT0002807	hsa-miR-491-5p	NM_004385	VCAN	circRNA	chr5	82835660	82835681	+	6	0	AGO1,AGO1-4,AGO2	8mer	ggaguaccuucccaAGGGGUGa	aauaacacauuauaUCCCCACa
MIMAT0002807	hsa-miR-491-5p	TCONS_00010018	TCONS_00010018	circRNA	chr5	87578389	87578410	+	1	0	AGO2	7mer-m8	ggaGUACCUUCCCAAGGGGUGa	uuaCAUGCCGUAAAUCCCCACu
MIMAT0002807	hsa-miR-491-5p	NM_012081	ELL2	circRNA	chr5	95224379	95224402	-	3	0	AGO2	7mer-m8	ggaguaccuucCCA--AGGGGUGa	cugcucuuucuGGUCCUCCCCACc
MIMAT0002807	hsa-miR-491-5p	NM_001012761	RGMB	circRNA	chr5	98131740	98131761	+	5	0	AGO1,AGO1-4,AGO2	8mer	ggaguaccuucccaAGGGGUGa	ucccuguaaaacaaUCCCCACa
MIMAT0002807	hsa-miR-491-5p	NM_001163315	FBXL17	circRNA	chr5	107195590	107195611	-	1	0	AGO2	7mer-m8	ggaguaccuucccAAGGGGUGa	uuuucauauccacUUCCCCACc
MIMAT0002807	hsa-miR-491-5p	NM_181836	TMED7	circRNA	chr5	114961724	114961747	-	1	0	AGO1-4	7mer-m8	ggaguaCCUUCCCA--AGGGGUGa	ccccccGAAAGGCUAAUCCCCACu
MIMAT0002807	hsa-miR-491-5p	NM_005509	DMXL1	circRNA	chr5	118469206	118469227	+	1	0	AGO1-4	8mer	ggaguacCUUCCCAAGGGGUGa	aauuccaGUAGCUUUCCCCACa
MIMAT0002807	hsa-miR-491-5p	NM_005509	DMXL1	circRNA	chr5	118485141	118485163	+	1	0	AGO1-4	7mer-m8	ggAGUACCU-UCCCAAGGGGUGa	ucUUCUGUAGAUGGCUCCCCACc
MIMAT0002807	hsa-miR-491-5p	NM_133372	FNIP1	circRNA	chr5	130978027	130978048	-	2	0	AGO1-4,AGO2	7mer-m8	ggaguaccuucccaAGGGGUGa	uacuguuuuguuccUCCCCACu
MIMAT0002807	hsa-miR-491-5p	NM_001098813	SEPT8	circRNA	chr5	132098215	132098236	-	2	0	AGO1-4,AGO2	7mer-m8	ggaguaccuuccCAAGGGGUGa	ccagaucuaccaGUUCCCCACg
MIMAT0002807	hsa-miR-491-5p	NM_015146	SEPT8	circRNA	chr5	132098215	132098236	-	2	0	AGO1-4,AGO2	7mer-m8	ggaguaccuuccCAAGGGGUGa	ccagaucuaccaGUUCCCCACg
MIMAT0002807	hsa-miR-491-5p	NM_021982	SEC24A	circRNA	chr5	134061260	134061281	+	1	0	AGO1-4	8mer	ggaguaccuucccAAGGGGUGa	aaacuagaauucaUUCCCCACa
MIMAT0002807	hsa-miR-491-5p	NM_014829	DDX46	circRNA	chr5	134164801	134164822	+	3	0	AGO1-4,AGO2	7mer-m8	ggAGUACCUUCCCAAGGGGUGa	uaUCAUAUUUUGUGUCCCCACc
MIMAT0002807	hsa-miR-491-5p	TCONS_00010097	TCONS_00010097	circRNA	chr5	134654807	134654828	+	1	0	AGO2	7mer-m8	ggaguaccuuccCAAGGGGUGa	agugaguccccuGCUCCCCACu
MIMAT0002807	hsa-miR-491-5p	TCONS_00010097	TCONS_00010097	circRNA	chr5	134670346	134670367	+	2	0	AGO1-4	7mer-m8	ggaguaccuucccaAGGGGUGa	aaaagacgcuguucUCCCCACu
MIMAT0002807	hsa-miR-491-5p	NM_000358	TGFBI	circRNA	chr5	135385105	135385126	+	2	0	AGO1-4	8mer	ggaguaccuucccaAGGGGUGa	uccaucuucucuccUCCCCACa
MIMAT0002807	hsa-miR-491-5p	NM_001001419	SMAD5	circRNA	chr5	135515777	135515798	+	2	0	AGO1-4,AGO2	7mer-m8	ggaguaccuucccaAGGGGUGa	uaaaaguugucaacUCCCCACc
MIMAT0002807	hsa-miR-491-5p	NM_080670	SLC35A4	circRNA	chr5	139948311	139948332	+	21	0	AGO1,AGO1-4,AGO2,AGO3	8mer	ggaGUACCUUCCCAAGGGGUGa	cucCACAGUGCUGCUCCCCACa
MIMAT0002807	hsa-miR-491-5p	NM_006083	IK	circRNA	chr5	140035517	140035538	+	3	1	AGO1,AGO1-4	7mer-m8	ggaguaccuUCCCAAGGGGUGa	ugcugacacAGAUAUCCCCACc
MIMAT0002807	hsa-miR-491-5p	NM_006083	IK	circRNA	chr5	140041939	140041960	+	3	0	AGO1-4,AGO2	7mer-m8	ggaGUACCUUCCCAAGGGGUGa	ccaCAAGGAUAUGCUCCCCACu
MIMAT0002807	hsa-miR-491-5p	NM_002109	HARS	circRNA	chr5	140053530	140053555	-	4	0	AGO1-4,AGO2	7mer-m8	ggaguACCU--UC--CCAAGGGGUGa	ccaguUGGAGCAGAUGCCUCCCCACc
MIMAT0002807	hsa-miR-491-5p	NM_005219	DIAPH1	circRNA	chr5	140896460	140896481	-	1	0	AGO1-4	8mer	ggaGUACCUUCCCAAGGGGUGa	gaaCAGUGAGACAUUCCCCACa
MIMAT0002807	hsa-miR-491-5p	NM_002587	PCDH1	circRNA	chr5	141242972	141242993	-	2	0	AGO1-4	7mer-m8	ggaguaccuucccaAGGGGUGa	acuaucgcucuaacUCCCCACu
MIMAT0002807	hsa-miR-491-5p	NM_032420	PCDH1	circRNA	chr5	141242972	141242993	-	2	0	AGO1-4	7mer-m8	ggaguaccuucccaAGGGGUGa	acuaucgcucuaacUCCCCACu
MIMAT0002807	hsa-miR-491-5p	NM_001197294	DPYSL3	circRNA	chr5	146781154	146781175	-	2	1	AGO1-4	7mer-m8	ggaGUACCUUCCCAAGGGGUGa	cugCAUUUGUGACAUCCCCACc
MIMAT0002807	hsa-miR-491-5p	NM_001543	NDST1	circRNA	chr5	149933672	149933697	+	3	0	AGO1-4,AGO2	8mer	ggaGUACCU-UC---CCAAGGGGUGa	uccCAUGUACAGACACGGUCCCCACa
MIMAT0002807	hsa-miR-491-5p	NM_002084	GPX3	circRNA	chr5	150408234	150408258	+	1	0	AGO2	7mer-m8	ggaguaccUUCCCA---AGGGGUGa	gcccucccAAGGCUACAUCCCCACc
MIMAT0002807	hsa-miR-491-5p	NM_004045	ATOX1	circRNA	chr5	151125867	151125888	-	5	0	AGO1-4,AGO2	8mer	ggaGUACCUUCCCAAGGGGUGa	uagCAGGGGCCUGGUCCCCACa
MIMAT0002807	hsa-miR-491-5p	NM_015315	LARP1	circRNA	chr5	154155199	154155220	+	1	0	AGO1-4	7mer-m8	ggaguaccuucccaAGGGGUGa	ucugaguugcauuaUCCCCACc
MIMAT0002807	hsa-miR-491-5p	NM_015315	LARP1	circRNA	chr5	154194018	154194039	+	9	1	AGO1-4,AGO2	7mer-m8	ggaguaccuuccCAAGGGGUGa	ggcugcaacccuGGUCCCCACc
MIMAT0002807	hsa-miR-491-5p	NM_015315	LARP1	circRNA	chr5	154194280	154194301	+	5	0	AGO1-4,AGO2	7mer-m8	ggaguaccuucccaAGGGGUGa	aagguuucagccucUCCCCACu
MIMAT0002807	hsa-miR-491-5p	NM_015315	LARP1	circRNA	chr5	154195626	154195647	+	4	0	AGO1-4	7mer-m8	ggaguaccuucccAAGGGGUGa	uuagccugugcccUUCCCCACc
MIMAT0002807	hsa-miR-491-5p	NM_033274	ADAM19	circRNA	chr5	156924016	156924037	-	1	0	AGO2	7mer-m8	ggaguaCCUUCCCAAGGGGUGa	uguacgGGCAAGUCUCCCCACu
MIMAT0002807	hsa-miR-491-5p	NM_182796	MAT2B	circRNA	chr5	162943637	162943663	+	2	0	AGO2	8mer	ggAGU-ACCUUC----CCAAGGGGUGa	gaUCACUGGCAGCAGAGGUUCCCCACa
MIMAT0002807	hsa-miR-491-5p	NM_001161661	WWC1	circRNA	chr5	167850852	167850873	+	1	0	AGO2	7mer-m8	ggaguaccuucccaAGGGGUGa	ccaugaccucccuaUCCCCACg
MIMAT0002807	hsa-miR-491-5p	NM_001161661	WWC1	circRNA	chr5	167850879	167850900	+	1	0	AGO2	7mer-m8	ggaguaccuucccaAGGGGUGa	cucucuccucccccUCCCCACc
MIMAT0002807	hsa-miR-491-5p	NM_022897	RANBP17	circRNA	chr5	170480675	170480696	+	1	0	AGO1-4	7mer-m8	ggaguaccuucccAAGGGGUGa	aguuuuguuuuuuUUCCCCACu
MIMAT0002807	hsa-miR-491-5p	NM_001017995	SH3PXD2B	circRNA	chr5	171760712	171760733	-	1	0	AGO2	8mer	ggAGUACCUUCCCAAGGGGUGa	gaUGACGCUGGAGAUCCCCACa
MIMAT0002807	hsa-miR-491-5p	NM_173664	ARL10	circRNA	chr5	175793502	175793526	+	1	0	AGO2	7mer-m8	ggaguACCUUCC---CAAGGGGUGa	accgcUGGAAGGCCACAUCCCCACc
MIMAT0002807	hsa-miR-491-5p	NM_052899	GPRIN1	circRNA	chr5	176022868	176022889	-	2	0	AGO1-4	7mer-m8	ggaguaccuucccaAGGGGUGa	cacucagugucccgUCCCCACc
MIMAT0002807	hsa-miR-491-5p	NM_001199297	UIMC1	circRNA	chr5	176365385	176365406	-	1	0	AGO2	7mer-m8	ggaguaccuuCCCAAGGGGUGa	cucuuuacuuGGUUUCCCCACc
MIMAT0002807	hsa-miR-491-5p	NM_002082	GRK6	circRNA	chr5	176868761	176868782	+	3	0	AGO1-4	7mer-m8	ggaGUACCUUCCCAAGGGGUGa	cagCGAGGAAGAGCUCCCCACc
MIMAT0002807	hsa-miR-491-5p	NM_004395	DBN1	circRNA	chr5	176886220	176886241	-	2	0	AGO1-4	7mer-m8	ggaguaccuucccaAGGGGUGa	ggcgcccacucccaUCCCCACg
MIMAT0002807	hsa-miR-491-5p	NM_080881	DBN1	circRNA	chr5	176886220	176886241	-	2	0	AGO1-4	7mer-m8	ggaguaccuucccaAGGGGUGa	ggcgcccacucccaUCCCCACg
MIMAT0002807	hsa-miR-491-5p	NM_016222	DDX41	circRNA	chr5	176942189	176942210	-	2	0	AGO1-4,AGO2	7mer-m8	ggagUACCUUCCCAAGGGGUGa	ucagAUCCAGGGCAUCCCCACc
MIMAT0002807	hsa-miR-491-5p	NR_024019	FAM193B	circRNA	chr5	176947064	176947085	-	6	0	AGO1-4,AGO2	7mer-m8	ggaguaccuuCCCAAGGGGUGa	aagacccucuGUGCUCCCCACc
MIMAT0002807	hsa-miR-491-5p	NR_024019	FAM193B	circRNA	chr5	176963617	176963638	-	1	0	AGO1-4	7mer-m8	ggaguaccuucCCAAGGGGUGa	ccagcuccuuuGGCUCCCCACc
MIMAT0002807	hsa-miR-491-5p	NM_014757	MAML1	circRNA	chr5	179201005	179201026	+	2	1	AGO1-4,AGO2	8mer	ggaguaccuucccaAGGGGUGa	uucaguuuccucucUCCCCACa
MIMAT0002807	hsa-miR-491-5p	NM_014757	MAML1	circRNA	chr5	179202687	179202713	+	3	0	AGO1-4,AGO2	7mer-m8	ggAGUACCU-----UCCCAAGGGGUGa	uaUCCUGGAGUAUUAUGUCUCCCCACc
MIMAT0002807	hsa-miR-491-5p	NM_002460	IRF4	circRNA	chr6	398874	398895	+	1	0	AGO2	8mer	ggaguaccuuCCCAAGGGGUGa	ccaggcucccGGAGUCCCCACa
MIMAT0002807	hsa-miR-491-5p	NM_004155	SERPINB9	circRNA	chr6	2890338	2890359	-	1	0	AGO2	7mer-m8	ggaguaccuuccCAAGGGGUGa	ccuguguccccaGAUCCCCACu
MIMAT0002807	hsa-miR-491-5p	NM_000904	NQO2	circRNA	chr6	3006653	3006675	+	2	0	AGO1-4	7mer-m8	ggAGUACCUUCCCA-AGGGGUGa	ccUCACCUAUGCCUCUCCCCACc
MIMAT0002807	hsa-miR-491-5p	NR_026855	DKFZP686I15217	circRNA	chr6	3006653	3006675	+	2	0	AGO1-4	7mer-m8	ggAGUACCUUCCCA-AGGGGUGa	ccUCACCUAUGCCUCUCCCCACc
MIMAT0002807	hsa-miR-491-5p	NM_015482	SLC22A23	circRNA	chr6	3323979	3324000	-	1	0	AGO2	8mer	ggaguaccuucccaAGGGGUGa	ggcaggacacacaaUCCCCACa
MIMAT0002807	hsa-miR-491-5p	NM_003913	PRPF4B	circRNA	chr6	4037732	4037756	+	2	0	AGO1-4	7mer-m8	ggagUACCUUC---CCAAGGGGUGa	uuagAAGGAGGUCUCGUUCCCCACu
MIMAT0002807	hsa-miR-491-5p	NM_001003699	RREB1	circRNA	chr6	7146265	7146287	+	1	0	AGO1-4	7mer-m8	ggAGUAC-CUUCCCA-AGGGGUGa	gcUC-UGCGCACCGUCUCCCCACc
MIMAT0002807	hsa-miR-491-5p	NM_001003699	RREB1	circRNA	chr6	7232062	7232083	+	1	0	AGO1-4	7mer-m8	ggaguaccuucccaAGGGGUGa	cagaagaucaccugUCCCCACu
MIMAT0002807	hsa-miR-491-5p	NM_001718	BMP6	circRNA	chr6	7727765	7727787	+	1	0	AGO1-4	7mer-m8	ggaguaCCUUC-CCAAGGGGUGa	ggcagcGGCGGCGCGUCCCCACu
MIMAT0002807	hsa-miR-491-5p	NM_002114	HIVEP1	circRNA	chr6	12163648	12163669	+	1	0	AGO2	8mer	ggaguaccuucccaAGGGGUGa	ccaggcuugccuucUCCCCACa
MIMAT0002807	hsa-miR-491-5p	NM_000332	ATXN1	circRNA	chr6	16761556	16761577	-	4	1	AGO1-4,AGO2	7mer-m8	ggaguaccuucccAAGGGGUGa	ccucugcccccccUUCCCCACg
MIMAT0002807	hsa-miR-491-5p	NM_017774	CDKAL1	circRNA	chr6	20955705	20955726	+	1	1	AGO1-4	8mer	ggaguaccuucccaAGGGGUGa	uauuggcaccaaucUCCCCACa
MIMAT0002807	hsa-miR-491-5p	NM_016614	TDP2	circRNA	chr6	24650238	24650259	-	7	0	AGO1,AGO1-4,AGO2,AGO3	8mer	ggaguaccuucccAAGGGGUGa	aaagaaaaauauuUUCCCCACa
MIMAT0002807	hsa-miR-491-5p	NM_017640	LRRC16A	circRNA	chr6	25420368	25420389	+	1	0	AGO2	7mer-m8	ggaguaccuucccaAGGGGUGa	uguaacagcgcgaaUCCCCACc
MIMAT0002807	hsa-miR-491-5p	NM_013375	ABT1	circRNA	chr6	26599015	26599036	+	6	1	AGO1-4,AGO2	7mer-m8	ggaguaccuucccaAGGGGUGa	gugggcuuccacugUCCCCACu
MIMAT0002807	hsa-miR-491-5p	NM_021058	HIST1H2BJ	circRNA	chr6	27094017	27094038	-	1	0	AGO1-4	7mer-m8	ggAGUACCUUCCCAAGGGGUGa	uuUCUAGGGUGGGAUCCCCACu
MIMAT0002807	hsa-miR-491-5p	NM_001184743	PGBD1	circRNA	chr6	28254857	28254871	+	1	0	AGO1-4	7mer-m8	ggaguaccuuccCAAGGGGUGa	#NAME?
MIMAT0002807	hsa-miR-491-5p	NM_032507	PGBD1	circRNA	chr6	28254857	28254871	+	1	0	AGO1-4	7mer-m8	ggaguaccuuccCAAGGGGUGa	#NAME?
MIMAT0002807	hsa-miR-491-5p	hsa_circ_0075924	hsa_circ_0075924	circRNA	chr6	30586571	30586592	+	2	0	AGO1-4,AGO2	7mer-m8	ggaguaccuucccaAGGGGUGa	ucuucugcauccccUCCCCACc
MIMAT0002807	hsa-miR-491-5p	hsa_circ_0075943	hsa_circ_0075943	circRNA	chr6	32125401	32125422	+	2	0	AGO2	7mer-m8	ggaguaccuuccCAAGGGGUGa	uguuuguacccaGAUCCCCACc
MIMAT0002807	hsa-miR-491-5p	hsa_circ_0075944	hsa_circ_0075944	circRNA	chr6	32136940	32136961	-	3	0	AGO1-4,AGO2	7mer-m8	ggaguaccuucccaAGGGGUGa	ccuugucuccccucUCCCCACu
MIMAT0002807	hsa-miR-491-5p	hsa_circ_0075944	hsa_circ_0075944	circRNA	chr6	32137004	32137025	-	2	0	AGO1-4,AGO2	8mer	ggaguaccuucccaAGGGGUGa	uguccccaucuuccUCCCCACa
MIMAT0002807	hsa-miR-491-5p	NM_001243961	HLA-DQB1	circRNA	chr6	32627853	32627874	-	1	0	AGO1-4	7mer-m8	ggaguaccuucccaAGGGGUGa	gucaucuccuuucaUCCCCACc
MIMAT0002807	hsa-miR-491-5p	hsa_circ_0075955	hsa_circ_0075955	circRNA	chr6	32940679	32940700	+	5	0	AGO1-4	8mer	ggaguaccuucccaAGGGGUGa	cugcaaaacgugacUCCCCACa
MIMAT0002807	hsa-miR-491-5p	hsa_circ_0075961	hsa_circ_0075961	circRNA	chr6	33374335	33374356	+	1	0	AGO1-4	7mer-m8	ggaguaccuucccaAGGGGUGa	uuccuaaacaucugUCCCCACc
MIMAT0002807	hsa-miR-491-5p	hsa_circ_0075965	hsa_circ_0075965	circRNA	chr6	33384943	33384964	-	1	0	AGO1-4	8mer	ggaguaccuuccCAAGGGGUGa	gggaaauucuuuGCUCCCCACa
MIMAT0002807	hsa-miR-491-5p	hsa_circ_0075966	hsa_circ_0075966	circRNA	chr6	33384943	33384964	-	1	0	AGO1-4	8mer	ggaguaccuuccCAAGGGGUGa	gggaaauucuuuGCUCCCCACa
MIMAT0002807	hsa-miR-491-5p	hsa_circ_0075967	hsa_circ_0075967	circRNA	chr6	33394066	33394087	+	1	0	AGO1-4	7mer-m8	ggaguaccuucccAAGGGGUGa	ccccccagaccucUUCCCCACc
MIMAT0002807	hsa-miR-491-5p	NM_145905	HMGA1	circRNA	chr6	34212964	34212985	+	13	0	AGO1,AGO1-4,AGO2	7mer-m8	ggaguaccuucccaAGGGGUGa	cugcaccugcugcgUCCCCACu
MIMAT0002807	hsa-miR-491-5p	NM_024294	C6orf106	circRNA	chr6	34556567	34556588	-	5	0	AGO2	7mer-m8	ggaguaccuucccaAGGGGUGa	auucccucuucaccUCCCCACc
MIMAT0002807	hsa-miR-491-5p	NM_015245	ANKS1A	circRNA	chr6	35051205	35051226	+	1	0	AGO2	7mer-m8	ggaGUACCUUCCCAAGGGGUGa	gcaCAUGAAGAAGAUCCCCACc
MIMAT0002807	hsa-miR-491-5p	NR_034069	SRPK1	circRNA	chr6	35802902	35802923	-	4	0	AGO2	8mer	ggaguacCUUCCCAAGGGGUGa	ugacccuGUGGAGAUCCCCACa
MIMAT0002807	hsa-miR-491-5p	NM_003137	SRPK1	circRNA	chr6	35858756	35858777	-	2	0	AGO1-4	7mer-m8	ggaGUACCUUCCCAAGGGGUGa	cacCGAGGCUCUGCUCCCCACu
MIMAT0002807	hsa-miR-491-5p	NR_034069	SRPK1	circRNA	chr6	35858756	35858777	-	2	0	AGO1-4	7mer-m8	ggaGUACCUUCCCAAGGGGUGa	cacCGAGGCUCUGCUCCCCACu
MIMAT0002807	hsa-miR-491-5p	NM_001220778	CDKN1A	circRNA	chr6	36653894	36653915	+	18	1	AGO1-4,AGO2	7mer-m8	ggaguaccuucccaAGGGGUGa	cagcuacuuccuccUCCCCACu
MIMAT0002807	hsa-miR-491-5p	NM_152734	C6orf89	circRNA	chr6	36891890	36891911	+	2	0	AGO2	7mer-m8	ggaguaccuucccaAGGGGUGa	aucagguucuuuuaUCCCCACu
MIMAT0002807	hsa-miR-491-5p	NM_152734	C6orf89	circRNA	chr6	36895600	36895621	+	1	0	AGO1-4	7mer-m8	ggaguaccuucccaAGGGGUGa	gcauuucccuguccUCCCCACc
MIMAT0002807	hsa-miR-491-5p	NM_152734	C6orf89	circRNA	chr6	36896125	36896150	+	1	0	AGO2	8mer	ggAGUACCU----UCCCAAGGGGUGa	cuUCAUUGACACCAUCGCUCCCCACa
MIMAT0002807	hsa-miR-491-5p	NM_017772	TBC1D22B	circRNA	chr6	37300133	37300154	+	1	0	AGO2	7mer-m8	ggaguaccuucccaAGGGGUGa	ucuauguguuuuuaUCCCCACc
MIMAT0002807	hsa-miR-491-5p	NM_017772	TBC1D22B	circRNA	chr6	37300314	37300335	+	1	0	AGO2	8mer	ggaguaccuucccaAGGGGUGa	acugucaccuucacUCCCCACa
MIMAT0002807	hsa-miR-491-5p	NM_015050	FTSJD2	circRNA	chr6	37449157	37449178	+	3	0	AGO1-4	7mer-m8	ggaguaccuuccCAAGGGGUGa	agccagcauccaGCUCCCCACc
MIMAT0002807	hsa-miR-491-5p	NM_001136017	CCND3	circRNA	chr6	41908240	41908261	-	6	0	AGO1-4,AGO2	7mer-m8	ggaguaccuucccaAGGGGUGa	cuaccugucuugcgUCCCCACc
MIMAT0002807	hsa-miR-491-5p	NM_138572	TAF8	circRNA	chr6	42025213	42025234	+	2	0	AGO1-4	8mer	ggaguaccuuccCAAGGGGUGa	ccugaguucccuGAUCCCCACa
MIMAT0002807	hsa-miR-491-5p	NM_018141	MRPS10	circRNA	chr6	42181936	42181956	-	1	0	AGO1-4	8mer	ggaguaccuucccAAGGGGUGa	#NAME?
MIMAT0002807	hsa-miR-491-5p	NM_015255	UBR2	circRNA	chr6	42646374	42646396	+	4	0	AGO1-4,AGO2	7mer-m8	ggagUACCUU-CCCAAGGGGUGa	uuaaAUGGAGUUCCUUCCCCACc
MIMAT0002807	hsa-miR-491-5p	hsa_circ_0001604	hsa_circ_000970	circRNA	chr6	42646374	42646396	+	4	0	AGO1-4,AGO2	7mer-m8	ggagUACCUU-CCCAAGGGGUGa	uuaaAUGGAGUUCCUUCCCCACc
MIMAT0002807	hsa-miR-491-5p	NM_000287	PEX6	circRNA	chr6	42942668	42942696	-	2	0	AGO2	7mer-m8	ggaGUACCUU---CCCA----AGGGGUGa	acaCAUCGAAAUUGUGUCUUCUCCCCACu
MIMAT0002807	hsa-miR-491-5p	NM_003131	SRF	circRNA	chr6	43147240	43147261	+	2	0	AGO1-4	8mer	ggaguaccuucccaAGGGGUGa	gaccgugccccaccUCCCCACa
MIMAT0002807	hsa-miR-491-5p	NM_003131	SRF	circRNA	chr6	43148827	43148848	+	2	0	AGO1-4	7mer-m8	ggaguaccuucccaAGGGGUGa	caucacucacucacUCCCCACu
MIMAT0002807	hsa-miR-491-5p	NM_014345	ZNF318	circRNA	chr6	43322552	43322572	-	4	0	AGO1-4,AGO2	7mer-m8	ggAGUACCUUCCCAAGGGGUGa	aaUCUUCG-UGUGAUCCCCACu
MIMAT0002807	hsa-miR-491-5p	NM_014345	ZNF318	circRNA	chr6	43323049	43323070	-	1	0	AGO2	8mer	ggaguaccuuccCAAGGGGUGa	cgacguuccucaGAUCCCCACa
MIMAT0002807	hsa-miR-491-5p	NM_015388	YIPF3	circRNA	chr6	43479653	43479675	-	4	0	AGO1-4,AGO2	7mer-m8	ggaguAC-CUUCCCAAGGGGUGa	uccuuUGAGAACCCCUCCCCACc
MIMAT0002807	hsa-miR-491-5p	NM_020750	XPO5	circRNA	chr6	43491115	43491135	-	1	0	AGO1-4	7mer-m8	ggaGUACCUUCCCAAGGGGUGa	uggCA-GGAAACUUUCCCCACu
MIMAT0002807	hsa-miR-491-5p	NM_001025366	VEGFA	circRNA	chr6	43738166	43738187	+	6	0	AGO1,AGO1-4,AGO2	7mer-m8	ggaguaccuucccAAGGGGUGa	uuuuugcuugccaUUCCCCACu
MIMAT0002807	hsa-miR-491-5p	NM_001171992	C6orf223	circRNA	chr6	43966453	43966474	-	1	0	AGO2	7mer-m8	ggaguaccuucccaAGGGGUGa	aaagguucaccaugUCCCCACu
MIMAT0002807	hsa-miR-491-5p	NM_032111	MRPL14	circRNA	chr6	44081643	44081664	-	6	1	AGO1-4,AGO2	7mer-m8	ggaguaccuucccaAGGGGUGa	aauuaagacacccaUCCCCACc
MIMAT0002807	hsa-miR-491-5p	NM_018426	TMEM63B	circRNA	chr6	44102211	44102232	+	1	0	AGO1-4	7mer-m8	ggaguaccuucccaAGGGGUGa	uccucacugcccccUCCCCACg
MIMAT0002807	hsa-miR-491-5p	NM_018426	TMEM63B	circRNA	chr6	44102429	44102450	+	3	0	AGO1-4	7mer-m8	ggaGUACCUUCCCAAGGGGUGa	gccCUUUGGGGGCGUCCCCACc
MIMAT0002807	hsa-miR-491-5p	NM_178148	SLC35B2	circRNA	chr6	44223109	44223130	-	1	0	AGO1-4	7mer-m8	ggaguaccuucCCAAGGGGUGa	uaaguucgucaGCUUCCCCACc
MIMAT0002807	hsa-miR-491-5p	NM_014452	TNFRSF21	circRNA	chr6	47202516	47202536	-	1	0	AGO2	8mer	ggagUACCUUCCCAAGGGGUGa	gacgGUGG-AGCCUUCCCCACa
MIMAT0002807	hsa-miR-491-5p	NM_002388	MCM3	circRNA	chr6	52141926	52141947	-	3	0	AGO2	7mer-m8	ggaguaccUUCCCAAGGGGUGa	ugcaccccGAGCUAUCCCCACc
MIMAT0002807	hsa-miR-491-5p	NM_001498	GCLC	circRNA	chr6	53374870	53374891	-	2	0	AGO1-4	8mer	ggaguaccuucccaAGGGGUGa	cuuuaguaucacucUCCCCACa
MIMAT0002807	hsa-miR-491-5p	NM_015548	DST	circRNA	chr6	56323854	56323875	-	3	0	AGO2	7mer-m8	ggaguaccuucccaAGGGGUGa	gaagccuucaaaaaUCCCCACg
MIMAT0002807	hsa-miR-491-5p	NM_015548	DST	circRNA	chr6	56328388	56328409	-	2	0	AGO1-4,AGO2	8mer	ggaguacCUUCCCAAGGGGUGa	cugcgcaGGCGGCCUCCCCACa
MIMAT0002807	hsa-miR-491-5p	NM_031469	SH3BGRL2	circRNA	chr6	80411295	80411316	+	1	0	AGO2	7mer-m8	ggAGUACCUUCCCAAGGGGUGa	agUUAUGUGCCAUCUCCCCACc
MIMAT0002807	hsa-miR-491-5p	NM_016021	UBE2J1	circRNA	chr6	90037547	90037568	-	2	0	AGO1-4,AGO2	7mer-m8	ggagUACCUUCCCAAGGGGUGa	ugagAAGAAAGAAAUCCCCACc
MIMAT0002807	hsa-miR-491-5p	NM_001195131	LOC100130890	circRNA	chr6	100002184	100002205	+	1	0	AGO1-4	7mer-m8	ggaguaccuUCCCAAGGGGUGa	guauuucucAGGUUUCCCCACu
MIMAT0002807	hsa-miR-491-5p	NM_001195131	LOC100130890	circRNA	chr6	100024305	100024326	+	4	6	AGO1-4	8mer	ggaguaccuucccaAGGGGUGa	caugucccagccagUCCCCACa
MIMAT0002807	hsa-miR-491-5p	NM_001166247	GRIK2	circRNA	chr6	102074341	102074359	+	1	0	AGO2	8mer	ggAGUACCUUCCCAAGGGGUGa	gcUC-UGGGA--GUUCCCCACa
MIMAT0002807	hsa-miR-491-5p	NM_001634	AMD1	circRNA	chr6	111215160	111215180	+	6	1	AGO1,AGO1-4,AGO2	8mer	ggAGUACCUUCCCAAGGGGUGa	uaUCAUCCAA-AAUUCCCCACa
MIMAT0002807	hsa-miR-491-5p	NM_002912	REV3L	circRNA	chr6	111688805	111688826	-	6	0	AGO1-4,AGO2	7mer-m8	ggaguaccuucccaAGGGGUGa	aaguccauguauacUCCCCACu
MIMAT0002807	hsa-miR-491-5p	NM_002912	REV3L	circRNA	chr6	111751820	111751841	-	1	0	AGO1-4	7mer-m8	ggaguaccuucccaAGGGGUGa	agcagccucuguccUCCCCACu
MIMAT0002807	hsa-miR-491-5p	NM_002356	MARCKS	circRNA	chr6	114181919	114181940	+	5	0	AGO1,AGO1-4,AGO2	8mer	ggaguaccuucccaAGGGGUGa	uuuuuuuucuccccUCCCCACa
MIMAT0002807	hsa-miR-491-5p	NM_001135648	PTPRK	circRNA	chr6	128642982	128643003	-	1	0	AGO2	7mer-m8	ggaguaccuucccAAGGGGUGa	uugccccucuuucUUCCCCACc
MIMAT0002807	hsa-miR-491-5p	NM_005923	MAP3K5	circRNA	chr6	137113549	137113570	-	1	0	AGO2	7mer-m8	ggaguaccuuCCCAAGGGGUGa	ccgcucacccGGCUUCCCCACc
MIMAT0002807	hsa-miR-491-5p	NM_020464	NHSL1	circRNA	chr6	138752525	138752546	-	2	0	AGO2	7mer-m8	ggaguaccuuccCAAGGGGUGa	ucauuccuuucuGCUCCCCACc
MIMAT0002807	hsa-miR-491-5p	NM_020464	NHSL1	circRNA	chr6	138962791	138962812	-	1	0	AGO1-4	7mer-m8	ggaguacCUUCCCAAGGGGUGa	gaaagcaGAGGAGUUCCCCACu
MIMAT0002807	hsa-miR-491-5p	NM_031922	REPS1	circRNA	chr6	139266469	139266490	-	1	0	AGO1-4	7mer-m8	ggAGUACCUUCCCAAGGGGUGa	uuUCACCACAGCAAUCCCCACc
MIMAT0002807	hsa-miR-491-5p	NM_182961	SYNE1	circRNA	chr6	152623031	152623054	-	1	0	AGO1-4	7mer-m8	ggagUACCUUCCCA--AGGGGUGa	cuggAUGGGGAGCUCCUCCCCACg
MIMAT0002807	hsa-miR-491-5p	NM_001130699	IPCEF1	circRNA	chr6	154661117	154661138	-	1	0	AGO1-4	7mer-m8	ggaguaccuucCCAAGGGGUGa	gaucuaacucuGGAUCCCCACu
MIMAT0002807	hsa-miR-491-5p	NM_014892	SCAF8	circRNA	chr6	155054956	155054977	+	3	0	AGO2	7mer-m8	ggaguaccuucccaAGGGGUGa	cccgcgucucgcucUCCCCACc
MIMAT0002807	hsa-miR-491-5p	NM_020732	ARID1B	circRNA	chr6	157405807	157405828	+	1	0	AGO2	7mer-m8	ggaGUACCUUCCCAAGGGGUGa	cucCAUUGAUGACCUCCCCACg
MIMAT0002807	hsa-miR-491-5p	hsa_circ_0001658	hsa_circ_001175	circRNA	chr6	157405807	157405828	+	1	0	AGO2	7mer-m8	ggaGUACCUUCCCAAGGGGUGa	cucCAUUGAUGACCUCCCCACg
MIMAT0002807	hsa-miR-491-5p	NM_020732	ARID1B	circRNA	chr6	157405905	157405926	+	1	0	AGO2	8mer	ggaguaccuucccaAGGGGUGa	cgcagucgccuuucUCCCCACa
MIMAT0002807	hsa-miR-491-5p	hsa_circ_0001658	hsa_circ_001175	circRNA	chr6	157405905	157405926	+	1	0	AGO2	8mer	ggaguaccuucccaAGGGGUGa	cgcagucgccuuucUCCCCACa
MIMAT0002807	hsa-miR-491-5p	NM_020732	ARID1B	circRNA	chr6	157522474	157522495	+	1	0	AGO2	8mer	ggAGUAC-CUUCCCAAGGGGUGa	ggUCAUGCCCACGG-UCCCCACa
MIMAT0002807	hsa-miR-491-5p	NM_024630	ZDHHC14	circRNA	chr6	158049706	158049727	+	1	0	AGO1-4	7mer-m8	ggaguaccuucccaAGGGGUGa	cugucaucccccacUCCCCACc
MIMAT0002807	hsa-miR-491-5p	NM_020245	TULP4	circRNA	chr6	158923539	158923560	+	2	0	AGO1-4	7mer-m8	ggaguaccuucccaAGGGGUGa	cccucgcuacuccaUCCCCACc
MIMAT0002807	hsa-miR-491-5p	NM_020245	TULP4	circRNA	chr6	158924557	158924579	+	1	0	AGO2	7mer-m8	ggaguaccuuccCA-AGGGGUGa	gagaagccccuuGUGUCCCCACc
MIMAT0002807	hsa-miR-491-5p	NM_020245	TULP4	circRNA	chr6	158929978	158929999	+	1	0	AGO1-4	8mer	ggaguaccuucCCAAGGGGUGa	ggcacaaucucGGCUCCCCACa
MIMAT0002807	hsa-miR-491-5p	NM_020823	TMEM181	circRNA	chr6	158992868	158992889	+	1	0	AGO2	7mer-m8	ggaguaccuucccAAGGGGUGa	uccagaccucacuUUCCCCACc
MIMAT0002807	hsa-miR-491-5p	NM_016098	BRP44L	circRNA	chr6	166778497	166778518	-	7	1	AGO1-4,AGO2	7mer-m8	ggaguaccuucccaAGGGGUGa	uacuuaaaauuuugUCCCCACu
MIMAT0002807	hsa-miR-491-5p	NM_001040000	MLLT4	circRNA	chr6	168348996	168349017	+	3	1	AGO1-4	7mer-m8	ggaguaccuucccaAGGGGUGa	ugaagccuaccccaUCCCCACu
MIMAT0002807	hsa-miR-491-5p	NM_001207008	MLLT4	circRNA	chr6	168348996	168349017	+	3	1	AGO1-4	7mer-m8	ggaguaccuucccaAGGGGUGa	ugaagccuaccccaUCCCCACu
MIMAT0002807	hsa-miR-491-5p	NM_182552	WDR27	circRNA	chr6	169880725	169880746	-	1	0	AGO1-4	7mer-m8	ggaguaccuucccaAGGGGUGa	aaaaguucuccaagUCCCCACc
MIMAT0002807	hsa-miR-491-5p	NM_182552	WDR27	circRNA	chr6	169898379	169898400	-	1	0	AGO2	8mer	ggaguaccuuccCAAGGGGUGa	uccccauuccucGCUCCCCACa
MIMAT0002807	hsa-miR-491-5p	NM_017802	HEATR2	circRNA	chr7	825308	825329	+	3	2	AGO1-4	7mer-m8	ggaguaccuucccaAGGGGUGa	acggcacacccuugUCCCCACc
MIMAT0002807	hsa-miR-491-5p	NM_001080453	INTS1	circRNA	chr7	1519145	1519166	-	2	0	AGO1-4	8mer	ggaguaccuuccCAAGGGGUGa	ccacccugcucaGCUCCCCACa
MIMAT0002807	hsa-miR-491-5p	TCONS_l2_00025633	TCONS_l2_00025633	circRNA	chr7	5245172	5245193	+	1	0	AGO2	8mer	ggaguaccuucccaAGGGGUGa	ugcugcugcccaugUCCCCACa
MIMAT0002807	hsa-miR-491-5p	TCONS_l2_00025633	TCONS_l2_00025633	circRNA	chr7	5263052	5263069	+	1	0	AGO2	8mer	ggAGUACCUUCCCAAGGGGUGa	ccUCAUGGGA----UCCCCACa
MIMAT0002807	hsa-miR-491-5p	NM_001080495	TNRC18	circRNA	chr7	5352419	5352439	-	2	0	AGO1-4,AGO2	7mer-m8	ggaGUACCUUCCCAAGGGGUGa	gcgCA-GGCGGCGCUCCCCACc
MIMAT0002807	hsa-miR-491-5p	TCONS_l2_00025633	TCONS_l2_00025633	circRNA	chr7	5595049	5595070	+	1	0	AGO1-4	7mer-m8	ggaguaccuucccaAGGGGUGa	gacccugaccccagUCCCCACu
MIMAT0002807	hsa-miR-491-5p	NM_003088	FSCN1	circRNA	chr7	5645257	5645278	+	7	1	AGO1-4,AGO2	7mer-m8	ggaguaccUUCCCAAGGGGUGa	ucgccccuAUGGACUCCCCACu
MIMAT0002807	hsa-miR-491-5p	TCONS_l2_00025633	TCONS_l2_00025633	circRNA	chr7	5645257	5645278	+	7	1	AGO1-4,AGO2	7mer-m8	ggaguaccUUCCCAAGGGGUGa	ucgccccuAUGGACUCCCCACu
MIMAT0002807	hsa-miR-491-5p	TCONS_l2_00025633	TCONS_l2_00025633	circRNA	chr7	6062851	6062872	+	1	0	AGO1-4	7mer-m8	ggaguaccuucccAAGGGGUGa	ggugacuguccccUUCCCCACu
MIMAT0002807	hsa-miR-491-5p	TCONS_l2_00025633	TCONS_l2_00025633	circRNA	chr7	6154071	6154092	+	1	0	AGO1-4	7mer-m8	ggaguaccuucccaAGGGGUGa	agcaccuccuuaucUCCCCACg
MIMAT0002807	hsa-miR-491-5p	TCONS_l2_00025633	TCONS_l2_00025633	circRNA	chr7	6156819	6156840	+	1	0	AGO1-4	7mer-m8	ggaguaccuucccAAGGGGUGa	cccuuuccauccuUUCCCCACc
MIMAT0002807	hsa-miR-491-5p	TCONS_l2_00025633	TCONS_l2_00025633	circRNA	chr7	6170122	6170147	+	2	0	AGO1-4	8mer	ggagUACCUU----CCCAAGGGGUGa	guggGUGGAAAUCUGGGCUCCCCACa
MIMAT0002807	hsa-miR-491-5p	TCONS_l2_00025633	TCONS_l2_00025633	circRNA	chr7	6518883	6518904	+	1	0	AGO1-4	7mer-m8	ggaguaccuucccaAGGGGUGa	ggcuccaguaauccUCCCCACu
MIMAT0002807	hsa-miR-491-5p	TCONS_l2_00025633	TCONS_l2_00025633	circRNA	chr7	6623293	6623318	+	1	0	AGO1-4	8mer	ggaGUACCUUCC----CAAGGGGUGa	ccaCGUGGCAGGACAUGCUCCCCACa
MIMAT0002807	hsa-miR-491-5p	TCONS_l2_00025633	TCONS_l2_00025633	circRNA	chr7	6695235	6695259	+	1	0	AGO1-4	8mer	ggAGUACCUUCC---CAAGGGGUGa	guUGGUCGAAGGAUCUUUCCCCACa
MIMAT0002807	hsa-miR-491-5p	NM_016265	ZNF12	circRNA	chr7	6735488	6735509	-	1	0	AGO1-4	8mer	ggaguaccuucccAAGGGGUGa	gggugugcuuuccUUCCCCACa
MIMAT0002807	hsa-miR-491-5p	NR_037598	INMT-FAM188B	circRNA	chr7	30911864	30911885	+	1	0	AGO2	7mer-m8	ggaguaccuucccaAGGGGUGa	ccaggacuuugaugUCCCCACc
MIMAT0002807	hsa-miR-491-5p	NM_015060	AVL9	circRNA	chr7	32815275	32815296	+	1	0	AGO1-4	7mer-m8	ggaguaccuucccaAGGGGUGa	cuuccugaccucucUCCCCACc
MIMAT0002807	hsa-miR-491-5p	NM_133468	BMPER	circRNA	chr7	34118483	34118504	+	2	0	AGO1-4	7mer-m8	ggaguaccuUCCCAAGGGGUGa	acgguguuuGGAGAUCCCCACu
MIMAT0002807	hsa-miR-491-5p	NM_001122956	DBNL	circRNA	chr7	44101035	44101056	+	1	0	AGO1-4	7mer-m8	ggaguaccuuCCCAAGGGGUGa	agccugcucuGUGCUCCCCACu
MIMAT0002807	hsa-miR-491-5p	NM_001127218	POLD2	circRNA	chr7	44161603	44161624	-	2	0	AGO2	7mer-m8	ggaguaccuucccaAGGGGUGa	cccacacucuacugUCCCCACc
MIMAT0002807	hsa-miR-491-5p	NM_015332	NUDCD3	circRNA	chr7	44423623	44423644	-	1	2	AGO2	7mer-m8	ggaguaccuucccaAGGGGUGa	cuguguugcauuucUCCCCACu
MIMAT0002807	hsa-miR-491-5p	NM_015332	NUDCD3	circRNA	chr7	44451496	44451517	-	1	0	AGO2	7mer-m8	ggaguaccuucccAAGGGGUGa	ggcgucucuguauUUCCCCACu
MIMAT0002807	hsa-miR-491-5p	NM_015332	NUDCD3	circRNA	chr7	44490302	44490323	-	5	0	AGO1-4	7mer-m8	ggaguaccuucccaAGGGGUGa	cuguaugcuuuacaUCCCCACu
MIMAT0002807	hsa-miR-491-5p	NM_019082	DDX56	circRNA	chr7	44611126	44611153	-	3	0	AGO1-4	7mer-m8	ggAGUACCUUCCCA------AGGGGUGa	guUCUUGGAACAGUUCAGCAUCCCCACc
MIMAT0002807	hsa-miR-491-5p	NM_030796	VOPP1	circRNA	chr7	55619320	55619341	-	1	0	AGO2	7mer-m8	ggaGUACCUUCCCAAGGGGUGa	ccgUGUUGAACCCUUCCCCACu
MIMAT0002807	hsa-miR-491-5p	NM_001483	GBAS	circRNA	chr7	56067012	56067033	+	4	0	AGO1-4,AGO2	7mer-m8	ggaguaccuucccaAGGGGUGa	cacugagccacuucUCCCCACc
MIMAT0002807	hsa-miR-491-5p	NM_016220	ZNF107	circRNA	chr7	64141769	64141790	+	1	0	AGO1-4	7mer-m8	ggAGUACCUUCCCAAGGGGUGa	acUCCUUUUAGUCAUCCCCACu
MIMAT0002807	hsa-miR-491-5p	NM_016220	ZNF107	circRNA	chr7	64141888	64141909	+	1	0	AGO1-4	8mer	ggaguaccuucccaAGGGGUGa	ccaacccuucaccaUCCCCACa
MIMAT0002807	hsa-miR-491-5p	NM_000181	GUSB	circRNA	chr7	65425928	65425952	-	1	0	AGO1	7mer-m8	ggagUACCUU--CCCA-AGGGGUGa	gccaAUGAAACCAGGUAUCCCCACu
MIMAT0002807	hsa-miR-491-5p	TCONS_l2_00027391	TCONS_l2_00027391	circRNA	chr7	66013934	66013959	-	1	0	AGO2	8mer	ggagUACCUUCCCA----AGGGGUGa	ucaaAAGGAACAGUCUAGUCCCCACa
MIMAT0002807	hsa-miR-491-5p	TCONS_l2_00027391	TCONS_l2_00027391	circRNA	chr7	66019323	66019344	-	1	0	AGO1-4	7mer-m8	ggaguaccuucccaAGGGGUGa	guguugggcaucacUCCCCACg
MIMAT0002807	hsa-miR-491-5p	TCONS_l2_00027398	TCONS_l2_00027398	circRNA	chr7	66019323	66019344	-	1	0	AGO1-4	7mer-m8	ggaguaccuucccaAGGGGUGa	guguugggcaucacUCCCCACg
MIMAT0002807	hsa-miR-491-5p	TCONS_l2_00026657	TCONS_l2_00026657	circRNA	chr7	66019694	66019715	-	2	0	AGO1-4	7mer-m8	ggaguaccuucccaAGGGGUGa	agcagaugacuuccUCCCCACc
MIMAT0002807	hsa-miR-491-5p	TCONS_l2_00027391	TCONS_l2_00027391	circRNA	chr7	66019694	66019715	-	2	0	AGO1-4	7mer-m8	ggaguaccuucccaAGGGGUGa	agcagaugacuuccUCCCCACc
MIMAT0002807	hsa-miR-491-5p	TCONS_l2_00027396	TCONS_l2_00027396	circRNA	chr7	66019694	66019715	-	2	0	AGO1-4	7mer-m8	ggaguaccuucccaAGGGGUGa	agcagaugacuuccUCCCCACc
MIMAT0002807	hsa-miR-491-5p	TCONS_l2_00027397	TCONS_l2_00027397	circRNA	chr7	66019694	66019715	-	2	0	AGO1-4	7mer-m8	ggaguaccuucccaAGGGGUGa	agcagaugacuuccUCCCCACc
MIMAT0002807	hsa-miR-491-5p	TCONS_l2_00027398	TCONS_l2_00027398	circRNA	chr7	66019694	66019715	-	2	0	AGO1-4	7mer-m8	ggaguaccuucccaAGGGGUGa	agcagaugacuuccUCCCCACc
MIMAT0002807	hsa-miR-491-5p	NM_153033	KCTD7	circRNA	chr7	66133709	66133736	+	1	0	AGO1-4	7mer-m8	ggaGUACCUU-CCC---A--AGGGGUGa	uugCGUGGGAUGGGCCUUAAUCCCCACu
MIMAT0002807	hsa-miR-491-5p	NM_153033	KCTD7	circRNA	chr7	66135240	66135262	+	2	0	AGO1-4	7mer-m8	ggaGUACCUU-CCCAAGGGGUGa	uucCCUGCAAUUCUUUCCCCACu
MIMAT0002807	hsa-miR-491-5p	NM_153033	KCTD7	circRNA	chr7	66157650	66157671	+	1	0	AGO1-4	7mer-m8	ggaguaccuucccAAGGGGUGa	cccuggucaucccUUCCCCACc
MIMAT0002807	hsa-miR-491-5p	NM_153033	KCTD7	circRNA	chr7	66163402	66163421	+	1	0	AGO1-4	7mer-m8	ggagUACCUUCCCAAGGGGUGa	gagaGUGCAAGG--UCCCCACc
MIMAT0002807	hsa-miR-491-5p	NM_153033	KCTD7	circRNA	chr7	66229085	66229106	+	2	0	AGO1-4	8mer	ggaguaccuucCCAAGGGGUGa	ugaggguuccaGUUUCCCCACa
MIMAT0002807	hsa-miR-491-5p	NM_153033	KCTD7	circRNA	chr7	66264791	66264814	+	1	0	AGO1-4	7mer-m8	ggaGUACCUUCCCA--AGGGGUGa	uggUAAGGCAAGGUAAUCCCCACg
MIMAT0002807	hsa-miR-491-5p	NM_014504	RABGEF1	circRNA	chr7	66270235	66270260	+	4	0	AGO1-4	7mer-m8	ggAGU-ACCUUCCCA---AGGGGUGa	cgUCAGCGGAUGACUUCCUCCCCACc
MIMAT0002807	hsa-miR-491-5p	NM_153033	KCTD7	circRNA	chr7	66270235	66270260	+	4	0	AGO1-4	7mer-m8	ggAGU-ACCUUCCCA---AGGGGUGa	cgUCAGCGGAUGACUUCCUCCCCACc
MIMAT0002807	hsa-miR-491-5p	NM_172020	POM121	circRNA	chr7	72411425	72411446	+	5	1	AGO1,AGO1-4,AGO2	7mer-m8	ggaguaccuucccaAGGGGUGa	cugcugcaccugccUCCCCACc
MIMAT0002807	hsa-miR-491-5p	NM_172020	POM121	circRNA	chr7	72412797	72412818	+	2	1	AGO1-4	7mer-m8	ggaguaccuucccaAGGGGUGa	cuccagcuccucccUCCCCACg
MIMAT0002807	hsa-miR-491-5p	NM_003388	CLIP2	circRNA	chr7	72619562	72619581	+	2	0	AGO1-4,AGO2	7mer-m8	ggAGUACCUUCCCAAGGGGUGa	gcUAAUGUGA--UCUCCCCACu
MIMAT0002807	hsa-miR-491-5p	NM_032999	GTF2I	circRNA	chr7	72619562	72619581	+	2	0	AGO1-4,AGO2	7mer-m8	ggAGUACCUUCCCAAGGGGUGa	gcUAAUGUGA--UCUCCCCACu
MIMAT0002807	hsa-miR-491-5p	NM_003388	CLIP2	circRNA	chr7	72640057	72640078	+	1	0	AGO2	7mer-m8	ggaguaccuuccCAAGGGGUGa	ugaugaccucaaGCUCCCCACg
MIMAT0002807	hsa-miR-491-5p	NM_032999	GTF2I	circRNA	chr7	72640057	72640078	+	1	0	AGO2	7mer-m8	ggaguaccuuccCAAGGGGUGa	ugaugaccucaaGCUCCCCACg
MIMAT0002807	hsa-miR-491-5p	NM_003388	CLIP2	circRNA	chr7	72709794	72709815	+	6	1	AGO1,AGO1-4,AGO2	7mer-m8	ggaguaccuucccaAGGGGUGa	cugcugcaccugccUCCCCACc
MIMAT0002807	hsa-miR-491-5p	NM_032999	GTF2I	circRNA	chr7	72709794	72709815	+	6	1	AGO1,AGO1-4,AGO2	7mer-m8	ggaguaccuucccaAGGGGUGa	cugcugcaccugccUCCCCACc
MIMAT0002807	hsa-miR-491-5p	NM_003388	CLIP2	circRNA	chr7	72711170	72711191	+	3	1	AGO1-4,AGO2	7mer-m8	ggaguaccuucccaAGGGGUGa	cuccagcuccucccUCCCCACg
MIMAT0002807	hsa-miR-491-5p	NM_032999	GTF2I	circRNA	chr7	72711170	72711191	+	3	1	AGO1-4,AGO2	7mer-m8	ggaguaccuucccaAGGGGUGa	cuccagcuccucccUCCCCACg
MIMAT0002807	hsa-miR-491-5p	NM_032408	BAZ1B	circRNA	chr7	72719360	72719377	-	1	0	AGO1-4	8mer	ggAGUACCUUCCCAAGGGGUGa	gcUCAUUGAA----UCCCCACa
MIMAT0002807	hsa-miR-491-5p	NR_002164	GTF2IRD2P1	circRNA	chr7	72719360	72719377	-	1	0	AGO1-4	8mer	ggAGUACCUUCCCAAGGGGUGa	gcUCAUUGAA----UCCCCACa
MIMAT0002807	hsa-miR-491-5p	NR_040582	STAG3L3	circRNA	chr7	72719360	72719377	-	1	0	AGO1-4	8mer	ggAGUACCUUCCCAAGGGGUGa	gcUCAUUGAA----UCCCCACa
MIMAT0002807	hsa-miR-491-5p	NM_003388	CLIP2	circRNA	chr7	72728473	72728494	+	1	0	AGO1-4	7mer-m8	ggaGUACCUUCCCAAGGGGUGa	cagCAAAGGGGACGUCCCCACu
MIMAT0002807	hsa-miR-491-5p	NM_032999	GTF2I	circRNA	chr7	72728473	72728494	+	1	0	AGO1-4	7mer-m8	ggaGUACCUUCCCAAGGGGUGa	cagCAAAGGGGACGUCCCCACu
MIMAT0002807	hsa-miR-491-5p	NM_032408	BAZ1B	circRNA	chr7	72757539	72757560	-	1	0	AGO1-4	7mer-m8	ggaguaccuucccaAGGGGUGa	agagccacagcccaUCCCCACc
MIMAT0002807	hsa-miR-491-5p	NR_002164	GTF2IRD2P1	circRNA	chr7	72757539	72757560	-	1	0	AGO1-4	7mer-m8	ggaguaccuucccaAGGGGUGa	agagccacagcccaUCCCCACc
MIMAT0002807	hsa-miR-491-5p	NR_040582	STAG3L3	circRNA	chr7	72757539	72757560	-	1	0	AGO1-4	7mer-m8	ggaguaccuucccaAGGGGUGa	agagccacagcccaUCCCCACc
MIMAT0002807	hsa-miR-491-5p	NR_040582	STAG3L3	circRNA	chr7	72867527	72867548	-	3	0	AGO1-4	7mer-m8	ggaguaccuucCCAAGGGGUGa	uuaugccucguGGUUCCCCACc
MIMAT0002807	hsa-miR-491-5p	NM_032408	BAZ1B	circRNA	chr7	72936276	72936297	-	3	0	AGO2	7mer-m8	ggaguaccuucccaAGGGGUGa	ccagcagccgccagUCCCCACc
MIMAT0002807	hsa-miR-491-5p	NR_040582	STAG3L3	circRNA	chr7	72936276	72936297	-	3	0	AGO2	7mer-m8	ggaguaccuucccaAGGGGUGa	ccagcagccgccagUCCCCACc
MIMAT0002807	hsa-miR-491-5p	NM_032408	BAZ1B	circRNA	chr7	72984581	72984602	-	2	0	AGO1-4,AGO2	7mer-m8	ggagUACCUUCCCAAGGGGUGa	guggGUGGAAUCUGUCCCCACc
MIMAT0002807	hsa-miR-491-5p	NR_040582	STAG3L3	circRNA	chr7	72984581	72984602	-	2	0	AGO1-4,AGO2	7mer-m8	ggagUACCUUCCCAAGGGGUGa	guggGUGGAAUCUGUCCCCACc
MIMAT0002807	hsa-miR-491-5p	NM_032408	BAZ1B	circRNA	chr7	72987028	72987049	-	1	0	AGO1-4	7mer-m8	ggaguaccuUCCCAAGGGGUGa	ucaagucucAGCUCUCCCCACu
MIMAT0002807	hsa-miR-491-5p	NR_040582	STAG3L3	circRNA	chr7	72987028	72987049	-	1	0	AGO1-4	7mer-m8	ggaguaccuUCCCAAGGGGUGa	ucaagucucAGCUCUCCCCACu
MIMAT0002807	hsa-miR-491-5p	NM_032408	BAZ1B	circRNA	chr7	73011798	73011819	-	4	1	AGO1-4,AGO2	7mer-m8	ggaguaccuucccAAGGGGUGa	ucccagguuucccUUCCCCACc
MIMAT0002807	hsa-miR-491-5p	NR_040582	STAG3L3	circRNA	chr7	73011798	73011819	-	4	1	AGO1-4,AGO2	7mer-m8	ggaguaccuucccAAGGGGUGa	ucccagguuucccUUCCCCACc
MIMAT0002807	hsa-miR-491-5p	NM_004603	STX1A	circRNA	chr7	73114336	73114357	-	1	0	AGO1-4	8mer	ggaguaccuUCCCAAGGGGUGa	guccucuccAGCUGUCCCCACa
MIMAT0002807	hsa-miR-491-5p	NM_032408	BAZ1B	circRNA	chr7	73114336	73114357	-	1	0	AGO1-4	8mer	ggaguaccuUCCCAAGGGGUGa	guccucuccAGCUGUCCCCACa
MIMAT0002807	hsa-miR-491-5p	NR_040582	STAG3L3	circRNA	chr7	73114336	73114357	-	1	0	AGO1-4	8mer	ggaguaccuUCCCAAGGGGUGa	guccucuccAGCUGUCCCCACa
MIMAT0002807	hsa-miR-491-5p	NM_032408	BAZ1B	circRNA	chr7	73132007	73132028	-	1	0	AGO1-4	8mer	ggaguaccuucccaAGGGGUGa	agacacccccacccUCCCCACa
MIMAT0002807	hsa-miR-491-5p	NR_040582	STAG3L3	circRNA	chr7	73132007	73132028	-	1	0	AGO1-4	8mer	ggaguaccuucccaAGGGGUGa	agacacccccacccUCCCCACa
MIMAT0002807	hsa-miR-491-5p	NM_003388	CLIP2	circRNA	chr7	73156681	73156702	+	1	0	AGO1-4	8mer	ggaguaccuuccCAAGGGGUGa	agccuggcccaaGAUCCCCACa
MIMAT0002807	hsa-miR-491-5p	NM_032999	GTF2I	circRNA	chr7	73156681	73156702	+	1	0	AGO1-4	8mer	ggaguaccuuccCAAGGGGUGa	agccuggcccaaGAUCCCCACa
MIMAT0002807	hsa-miR-491-5p	NM_032408	BAZ1B	circRNA	chr7	73212423	73212444	-	1	0	AGO1-4	7mer-m8	ggaguaccuucccaAGGGGUGa	ucucccucucccucUCCCCACg
MIMAT0002807	hsa-miR-491-5p	NR_040582	STAG3L3	circRNA	chr7	73212423	73212444	-	1	0	AGO1-4	7mer-m8	ggaguaccuucccaAGGGGUGa	ucucccucucccucUCCCCACg
MIMAT0002807	hsa-miR-491-5p	NM_032408	BAZ1B	circRNA	chr7	73246431	73246454	-	1	0	AGO1-4	7mer-m8	ggaguacCUUC--CCAAGGGGUGa	gccagcaGAAGCCAGCUCCCCACu
MIMAT0002807	hsa-miR-491-5p	NR_040582	STAG3L3	circRNA	chr7	73246431	73246454	-	1	0	AGO1-4	7mer-m8	ggaguacCUUC--CCAAGGGGUGa	gccagcaGAAGCCAGCUCCCCACu
MIMAT0002807	hsa-miR-491-5p	NM_001305	CLDN4	circRNA	chr7	73246509	73246530	+	7	0	AGO1-4,AGO2	7mer-m8	ggaGUACCUUCCCAAGGGGUGa	cccCAUUUACAUUUUCCCCACu
MIMAT0002807	hsa-miR-491-5p	NM_003388	CLIP2	circRNA	chr7	73246509	73246530	+	7	0	AGO1-4,AGO2	7mer-m8	ggaGUACCUUCCCAAGGGGUGa	cccCAUUUACAUUUUCCCCACu
MIMAT0002807	hsa-miR-491-5p	NM_032999	GTF2I	circRNA	chr7	73246509	73246530	+	7	0	AGO1-4,AGO2	7mer-m8	ggaGUACCUUCCCAAGGGGUGa	cccCAUUUACAUUUUCCCCACu
MIMAT0002807	hsa-miR-491-5p	NM_032408	BAZ1B	circRNA	chr7	73252479	73252501	-	2	0	AGO1-4	7mer-m8	ggAGUAC-CUUCCCAAGGGGUGa	aaUUACGUCAAGAAUUCCCCACc
MIMAT0002807	hsa-miR-491-5p	NR_040582	STAG3L3	circRNA	chr7	73252479	73252501	-	2	0	AGO1-4	7mer-m8	ggAGUAC-CUUCCCAAGGGGUGa	aaUUACGUCAAGAAUUCCCCACc
MIMAT0002807	hsa-miR-491-5p	NM_003388	CLIP2	circRNA	chr7	73462889	73462910	+	1	0	AGO1-4	7mer-m8	ggaguaccuuCCCAAGGGGUGa	gagugccccuGGAGUCCCCACc
MIMAT0002807	hsa-miR-491-5p	NM_032999	GTF2I	circRNA	chr7	73462889	73462910	+	1	0	AGO1-4	7mer-m8	ggaguaccuuCCCAAGGGGUGa	gagugccccuGGAGUCCCCACc
MIMAT0002807	hsa-miR-491-5p	NM_003388	CLIP2	circRNA	chr7	73483115	73483136	+	1	1	AGO1-4	7mer-m8	ggaguaccuucccaAGGGGUGa	caugccccuccgacUCCCCACc
MIMAT0002807	hsa-miR-491-5p	NM_032999	GTF2I	circRNA	chr7	73483115	73483136	+	1	1	AGO1-4	7mer-m8	ggaguaccuucccaAGGGGUGa	caugccccuccgacUCCCCACc
MIMAT0002807	hsa-miR-491-5p	NM_003388	CLIP2	circRNA	chr7	73483554	73483577	+	3	1	AGO1-4	7mer-m8	ggaGUACCUUCCCA--AGGGGUGa	ccaCUUGGCCGUCUCCUCCCCACc
MIMAT0002807	hsa-miR-491-5p	NM_032999	GTF2I	circRNA	chr7	73483554	73483577	+	3	1	AGO1-4	7mer-m8	ggaGUACCUUCCCA--AGGGGUGa	ccaCUUGGCCGUCUCCUCCCCACc
MIMAT0002807	hsa-miR-491-5p	NM_003388	CLIP2	circRNA	chr7	73483573	73483594	+	3	0	AGO1-4	8mer	ggaguaccuuccCAAGGGGUGa	ccaccgaucgcuGUUCCCCACa
MIMAT0002807	hsa-miR-491-5p	NM_032999	GTF2I	circRNA	chr7	73483573	73483594	+	3	0	AGO1-4	8mer	ggaguaccuuccCAAGGGGUGa	ccaccgaucgcuGUUCCCCACa
MIMAT0002807	hsa-miR-491-5p	NM_003388	CLIP2	circRNA	chr7	73483844	73483865	+	1	1	AGO1-4	7mer-m8	ggaguaccuucccaAGGGGUGa	ugccaggcaucuccUCCCCACc
MIMAT0002807	hsa-miR-491-5p	NM_032999	GTF2I	circRNA	chr7	73483844	73483865	+	1	1	AGO1-4	7mer-m8	ggaguaccuucccaAGGGGUGa	ugccaggcaucuccUCCCCACc
MIMAT0002807	hsa-miR-491-5p	NM_003388	CLIP2	circRNA	chr7	73483858	73483880	+	1	2	AGO1-4	8mer	ggaguaccuUCCCA-AGGGGUGa	uccccacccGGGGUGUCCCCACa
MIMAT0002807	hsa-miR-491-5p	NM_032999	GTF2I	circRNA	chr7	73483858	73483880	+	1	2	AGO1-4	8mer	ggaguaccuUCCCA-AGGGGUGa	uccccacccGGGGUGUCCCCACa
MIMAT0002807	hsa-miR-491-5p	NM_003388	CLIP2	circRNA	chr7	73535433	73535454	+	1	0	AGO1-4	7mer-m8	ggaguaccuuccCAAGGGGUGa	gccagacccaccGUUCCCCACc
MIMAT0002807	hsa-miR-491-5p	NM_032999	GTF2I	circRNA	chr7	73535433	73535454	+	1	0	AGO1-4	7mer-m8	ggaguaccuuccCAAGGGGUGa	gccagacccaccGUUCCCCACc
MIMAT0002807	hsa-miR-491-5p	NM_002314	LIMK1	circRNA	chr7	73535642	73535663	+	3	0	AGO1-4,AGO2	7mer-m8	ggaguaccuucccaAGGGGUGa	cucagcugccccugUCCCCACc
MIMAT0002807	hsa-miR-491-5p	NM_003388	CLIP2	circRNA	chr7	73535642	73535663	+	3	0	AGO1-4,AGO2	7mer-m8	ggaguaccuucccaAGGGGUGa	cucagcugccccugUCCCCACc
MIMAT0002807	hsa-miR-491-5p	NM_032999	GTF2I	circRNA	chr7	73535642	73535663	+	3	0	AGO1-4,AGO2	7mer-m8	ggaguaccuucccaAGGGGUGa	cucagcugccccugUCCCCACc
MIMAT0002807	hsa-miR-491-5p	NM_002314	LIMK1	circRNA	chr7	73536832	73536853	+	3	0	AGO1-4,AGO2	7mer-m8	ggaguaccuucccaAGGGGUGa	aauaaauuccguacUCCCCACc
MIMAT0002807	hsa-miR-491-5p	NM_003388	CLIP2	circRNA	chr7	73536832	73536853	+	3	0	AGO1-4,AGO2	7mer-m8	ggaguaccuucccaAGGGGUGa	aauaaauuccguacUCCCCACc
MIMAT0002807	hsa-miR-491-5p	NM_032999	GTF2I	circRNA	chr7	73536832	73536853	+	3	0	AGO1-4,AGO2	7mer-m8	ggaguaccuucccaAGGGGUGa	aauaaauuccguacUCCCCACc
MIMAT0002807	hsa-miR-491-5p	NM_003388	CLIP2	circRNA	chr7	73592239	73592260	+	1	0	AGO1-4	8mer	ggaguaccuucccAAGGGGUGa	ucugagccucguuUUCCCCACa
MIMAT0002807	hsa-miR-491-5p	NM_032999	GTF2I	circRNA	chr7	73592239	73592260	+	1	0	AGO1-4	8mer	ggaguaccuucccAAGGGGUGa	ucugagccucguuUUCCCCACa
MIMAT0002807	hsa-miR-491-5p	NM_003388	CLIP2	circRNA	chr7	73593168	73593188	+	1	0	AGO1-4	7mer-m8	ggAGUACCUUCCCAAGGGGUGa	guUCUUCGAA-GUUUCCCCACg
MIMAT0002807	hsa-miR-491-5p	NM_032999	GTF2I	circRNA	chr7	73593168	73593188	+	1	0	AGO1-4	7mer-m8	ggAGUACCUUCCCAAGGGGUGa	guUCUUCGAA-GUUUCCCCACg
MIMAT0002807	hsa-miR-491-5p	NM_003388	CLIP2	circRNA	chr7	73596711	73596732	+	1	0	AGO1-4	7mer-m8	ggaguACCUUCCCAAGGGGUGa	ggguuUUGCCGUGUUCCCCACg
MIMAT0002807	hsa-miR-491-5p	NM_032999	GTF2I	circRNA	chr7	73596711	73596732	+	1	0	AGO1-4	7mer-m8	ggaguACCUUCCCAAGGGGUGa	ggguuUUGCCGUGUUCCCCACg
MIMAT0002807	hsa-miR-491-5p	NM_003388	CLIP2	circRNA	chr7	73596747	73596770	+	1	0	AGO1-4	7mer-m8	ggaguaccUUC-CCA-AGGGGUGa	cugagcucAAGUGAUCUCCCCACc
MIMAT0002807	hsa-miR-491-5p	NM_032999	GTF2I	circRNA	chr7	73596747	73596770	+	1	0	AGO1-4	7mer-m8	ggaguaccUUC-CCA-AGGGGUGa	cugagcucAAGUGAUCUCCCCACc
MIMAT0002807	hsa-miR-491-5p	NM_003388	CLIP2	circRNA	chr7	73609305	73609327	+	4	0	AGO1-4	7mer-m8	ggAGUA-CCUUCCCAAGGGGUGa	agUUGUCGGCAUAGAUCCCCACg
MIMAT0002807	hsa-miR-491-5p	NM_032999	GTF2I	circRNA	chr7	73609305	73609327	+	4	0	AGO1-4	7mer-m8	ggAGUA-CCUUCCCAAGGGGUGa	agUUGUCGGCAUAGAUCCCCACg
MIMAT0002807	hsa-miR-491-5p	NM_032408	BAZ1B	circRNA	chr7	73648945	73648966	-	1	0	AGO1-4	8mer	ggaguaccuucccaAGGGGUGa	ucaugacccaaacaUCCCCACa
MIMAT0002807	hsa-miR-491-5p	NR_040582	STAG3L3	circRNA	chr7	73648945	73648966	-	1	0	AGO1-4	8mer	ggaguaccuucccaAGGGGUGa	ucaugacccaaacaUCCCCACa
MIMAT0002807	hsa-miR-491-5p	NM_003388	CLIP2	circRNA	chr7	73871833	73871854	+	3	0	AGO1-4	7mer-m8	ggAGUACCUUCCCAAGGGGUGa	ucUCUGGGGCAAGUUCCCCACc
MIMAT0002807	hsa-miR-491-5p	NM_032999	GTF2I	circRNA	chr7	73871833	73871854	+	3	0	AGO1-4	7mer-m8	ggAGUACCUUCCCAAGGGGUGa	ucUCUGGGGCAAGUUCCCCACc
MIMAT0002807	hsa-miR-491-5p	NM_003388	CLIP2	circRNA	chr7	73871890	73871911	+	2	0	AGO1-4,AGO2	7mer-m8	ggaguaccuucccaAGGGGUGa	uggggcccccucucUCCCCACu
MIMAT0002807	hsa-miR-491-5p	NM_032999	GTF2I	circRNA	chr7	73871890	73871911	+	2	0	AGO1-4,AGO2	7mer-m8	ggaguaccuucccaAGGGGUGa	uggggcccccucucUCCCCACu
MIMAT0002807	hsa-miR-491-5p	NM_003388	CLIP2	circRNA	chr7	73877322	73877343	+	1	0	AGO2	7mer-m8	ggAGUACCUUCCCAAGGGGUGa	caUCAUCUUAUGUAUCCCCACc
MIMAT0002807	hsa-miR-491-5p	NM_032999	GTF2I	circRNA	chr7	73877322	73877343	+	1	0	AGO2	7mer-m8	ggAGUACCUUCCCAAGGGGUGa	caUCAUCUUAUGUAUCCCCACc
MIMAT0002807	hsa-miR-491-5p	NM_003388	CLIP2	circRNA	chr7	73894613	73894633	+	1	0	AGO1-4	7mer-m8	ggAGUACCUUCCCAAGGGGUGa	gcUGGUGGCUGUG-UCCCCACc
MIMAT0002807	hsa-miR-491-5p	NM_032999	GTF2I	circRNA	chr7	73894613	73894633	+	1	0	AGO1-4	7mer-m8	ggAGUACCUUCCCAAGGGGUGa	gcUGGUGGCUGUG-UCCCCACc
MIMAT0002807	hsa-miR-491-5p	NM_003388	CLIP2	circRNA	chr7	73894631	73894651	+	1	0	AGO1-4	7mer-m8	ggaGUACCUUCCCAAGGGGUGa	accCCUGUGAUUG-UCCCCACg
MIMAT0002807	hsa-miR-491-5p	NM_032999	GTF2I	circRNA	chr7	73894631	73894651	+	1	0	AGO1-4	7mer-m8	ggaGUACCUUCCCAAGGGGUGa	accCCUGUGAUUG-UCCCCACg
MIMAT0002807	hsa-miR-491-5p	NM_032408	BAZ1B	circRNA	chr7	74071657	74071678	-	1	0	AGO1-4	7mer-m8	ggaguaccuucccaAGGGGUGa	uggcuccggcgucgUCCCCACc
MIMAT0002807	hsa-miR-491-5p	NR_040582	STAG3L3	circRNA	chr7	74071657	74071678	-	1	0	AGO1-4	7mer-m8	ggaguaccuucccaAGGGGUGa	uggcuccggcgucgUCCCCACc
MIMAT0002807	hsa-miR-491-5p	NM_003388	CLIP2	circRNA	chr7	74077230	74077251	+	2	0	AGO1-4,AGO2	7mer-m8	ggaguaccuucccAAGGGGUGa	ugaccccccuccuUUCCCCACc
MIMAT0002807	hsa-miR-491-5p	NM_000265	NCF1	circRNA	chr7	74193739	74193760	+	1	0	AGO2	7mer-m8	ggaguaccuuccCAAGGGGUGa	ugaugaccucaaGCUCCCCACg
MIMAT0002807	hsa-miR-491-5p	NM_001099415	POM121C	circRNA	chr7	75052044	75052065	-	2	1	AGO1-4	7mer-m8	ggaguaccuucccaAGGGGUGa	cuccagcuccucccUCCCCACg
MIMAT0002807	hsa-miR-491-5p	NM_001099415	POM121C	circRNA	chr7	75053418	75053440	-	23	0	AGO1,AGO1-4,AGO2	7mer-m8	ggaguACCUU-CCCAAGGGGUGa	gcugcUGCAACUGCCUCCCCACc
MIMAT0002807	hsa-miR-491-5p	NM_001099415	POM121C	circRNA	chr7	75185057	75185078	-	1	0	AGO1-4	8mer	ggaguaccuucccaAGGGGUGa	ggcgcagugauccaUCCCCACa
MIMAT0002807	hsa-miR-491-5p	NM_001099415	POM121C	circRNA	chr7	75321251	75321272	-	1	0	AGO1-4	7mer-m8	ggaguaccuucccaAGGGGUGa	gauacuuucaccccUCCCCACc
MIMAT0002807	hsa-miR-491-5p	NM_001099415	POM121C	circRNA	chr7	75359343	75359369	-	3	0	AGO1-4	7mer-m8	ggaGUACCUUCC-----CAAGGGGUGa	cccCAUGGCAGGACAAUGGUCCCCACc
MIMAT0002807	hsa-miR-491-5p	NM_001099415	POM121C	circRNA	chr7	75359435	75359457	-	2	0	AGO1-4	8mer	ggaGUACC-UUCCCAAGGGGUGa	uucUGUGGCACUGACUCCCCACa
MIMAT0002807	hsa-miR-491-5p	NM_001099415	POM121C	circRNA	chr7	75362822	75362843	-	2	0	AGO1-4,AGO2	7mer-m8	ggaGUACCUUCCCAAGGGGUGa	gacCCUUGGUGUGUUCCCCACc
MIMAT0002807	hsa-miR-491-5p	NM_001099415	POM121C	circRNA	chr7	75832194	75832215	-	1	0	AGO2	8mer	ggaguaccuucccaAGGGGUGa	ucccacuaaaucucUCCCCACa
MIMAT0002807	hsa-miR-491-5p	NM_005338	HIP1	circRNA	chr7	75832194	75832215	-	1	0	AGO2	8mer	ggaguaccuucccaAGGGGUGa	ucccacuaaaucucUCCCCACa
MIMAT0002807	hsa-miR-491-5p	NM_001145306	CDK6	circRNA	chr7	92235825	92235846	-	4	0	AGO2	8mer	ggaguaccuucccaAGGGGUGa	caagaugaccaacaUCCCCACa
MIMAT0002807	hsa-miR-491-5p	NM_001259	CDK6	circRNA	chr7	92235825	92235846	-	4	0	AGO2	8mer	ggaguaccuucccaAGGGGUGa	caagaugaccaacaUCCCCACa
MIMAT0002807	hsa-miR-491-5p	NM_001184961	PEG10	circRNA	chr7	94292698	94292719	+	3	1	AGO1-4,AGO2	8mer	ggaguaccuucccaAGGGGUGa	gauccaggccuccaUCCCCACa
MIMAT0002807	hsa-miR-491-5p	NM_001184961	PEG10	circRNA	chr7	94293870	94293889	+	3	0	AGO1,AGO1-4,AGO2	8mer	ggaguaccUUCCCAAGGGGUGa	gaaauaauAAGG--UCCCCACa
MIMAT0002807	hsa-miR-491-5p	NM_015068	PEG10	circRNA	chr7	94293870	94293889	+	3	0	AGO1,AGO1-4,AGO2	8mer	ggaguaccUUCCCAAGGGGUGa	gaaauaauAAGG--UCCCCACa
MIMAT0002807	hsa-miR-491-5p	NM_001166160	PPP1R9A	circRNA	chr7	94919645	94919664	+	1	0	AGO2	7mer-m8	ggaGUAC-CUUCCCAAGGGGUGa	cucCAAGAGAAG---UCCCCACc
MIMAT0002807	hsa-miR-491-5p	NM_001244580	TRRAP	circRNA	chr7	98606007	98606027	+	2	0	AGO1-4	8mer	ggAGUACCUUCCCAAGGGGUGa	ggUUGUGGCA-GUUUCCCCACa
MIMAT0002807	hsa-miR-491-5p	NM_003439	ZKSCAN1	circRNA	chr7	99621149	99621173	+	2	0	AGO1-4	8mer	ggaguaccUUCCCA---AGGGGUGa	gggaagccACGGGUCUGUCCCCACa
MIMAT0002807	hsa-miR-491-5p	hsa_circ_0001727	hsa_circ_000017	circRNA	chr7	99621149	99621173	+	2	0	AGO1-4	8mer	ggaguaccUUCCCA---AGGGGUGa	gggaagccACGGGUCUGUCCCCACa
MIMAT0002807	hsa-miR-491-5p	NM_005641	TAF6	circRNA	chr7	99704990	99705011	-	1	1	AGO1-4	7mer-m8	ggaguaccuucccaAGGGGUGa	cggcaucguccccgUCCCCACu
MIMAT0002807	hsa-miR-491-5p	NR_036569	PILRB	circRNA	chr7	99951100	99951125	+	4	0	AGO2	7mer-m8	ggAGUACCUUCC-CA---AGGGGUGa	cgUCCUGGUGGGCAUCACUCCCCACc
MIMAT0002807	hsa-miR-491-5p	NM_006076	AGFG2	circRNA	chr7	100151755	100151776	+	2	0	AGO1-4	7mer-m8	ggaguaccuucccaAGGGGUGa	agcacucagccaccUCCCCACu
MIMAT0002807	hsa-miR-491-5p	NM_004444	EPHB4	circRNA	chr7	100401064	100401085	-	4	0	AGO1-4,AGO2	7mer-m8	ggaGUACCUUCCCAAGGGGUGa	ugaCCUGCAGGAACUCCCCACc
MIMAT0002807	hsa-miR-491-5p	NM_020246	SLC12A9	circRNA	chr7	100464421	100464442	+	1	0	AGO1-4	7mer-m8	ggAGUACCUUCCCA-AGGGGUGa	acUC-UGGGUGGCUGUCCCCACc
MIMAT0002807	hsa-miR-491-5p	NM_015908	SRRT	circRNA	chr7	100485885	100485906	+	6	1	AGO1-4,AGO2	8mer	ggaguaccuucccaAGGGGUGa	uguccgcccugcagUCCCCACa
MIMAT0002807	hsa-miR-491-5p	hsa_circ_0001731	hsa_circ_001182	circRNA	chr7	100732070	100732090	+	3	0	AGO1,AGO2	7mer-m8	ggAGUACCUUCCCAAGGGGUGa	uuUUACUGCA-GUUUCCCCACg
MIMAT0002807	hsa-miR-491-5p	hsa_circ_0001731	hsa_circ_001182	circRNA	chr7	100735048	100735069	+	1	0	AGO1-4	7mer-m8	ggaguaccuucccaAGGGGUGa	ucucccucucccucUCCCCACg
MIMAT0002807	hsa-miR-491-5p	NM_198571	NAT16	circRNA	chr7	100814775	100814796	-	1	0	AGO1-4	7mer-m8	ggaguaccuucccaAGGGGUGa	agaucagugcccucUCCCCACu
MIMAT0002807	hsa-miR-491-5p	NM_001084	PLOD3	circRNA	chr7	100849462	100849484	-	2	0	AGO1-4	7mer-m8	ggaguaccuuccCA-AGGGGUGa	augggucucucuGUCUCCCCACu
MIMAT0002807	hsa-miR-491-5p	NM_001202543	CUX1	circRNA	chr7	101893826	101893851	+	7	0	AGO1-4,AGO2	7mer-m8	ggaGUACCUU----CCCAAGGGGUGa	gaaCGUGGCAUUCUGGGCUCCCCACu
MIMAT0002807	hsa-miR-491-5p	NM_001202543	CUX1	circRNA	chr7	101900798	101900819	+	9	0	AGO1-4,AGO2	8mer	ggagUACCUUCCCAAGGGGUGa	aaagAAGGUGGUUUUCCCCACa
MIMAT0002807	hsa-miR-491-5p	NM_182931	MLL5	circRNA	chr7	104702646	104702669	+	4	0	AGO1-4,AGO2	7mer-m8	ggagUACCUUCCCA--AGGGGUGa	agaaAUCCAACAGUUAUCCCCACc
MIMAT0002807	hsa-miR-491-5p	NR_024199	CBLL1	circRNA	chr7	107401058	107401084	+	17	0	AGO1,AGO1-4,AGO2,AGO3	7mer-m8	ggaGUAC-CUUCCCA----AGGGGUGa	aucCCUGUGAAGUUUUUCCUCCCCACu
MIMAT0002807	hsa-miR-491-5p	NM_001233	CAV2	circRNA	chr7	116139944	116139965	+	1	0	AGO1-4	7mer-m8	ggaGUACCU-UCCCAAGGGGUGa	gacCA-GGACCGGGAUCCCCACc
MIMAT0002807	hsa-miR-491-5p	NM_001127500	MET	circRNA	chr7	116339610	116339632	+	1	0	AGO1-4	8mer	ggAGU-ACCUUCCCAAGGGGUGa	guUCACUGCAUAUUCUCCCCACa
MIMAT0002807	hsa-miR-491-5p	NM_021908	ST7	circRNA	chr7	116863144	116863165	+	2	0	AGO2	8mer	ggaguaccuucccaAGGGGUGa	cuucccucucucacUCCCCACa
MIMAT0002807	hsa-miR-491-5p	NM_014390	SND1	circRNA	chr7	127292457	127292481	+	3	0	AGO1-4,AGO2	7mer-m8	ggaGUACCUU---CCCAAGGGGUGa	cucCGGGGGACCCGCGGUCCCCACc
MIMAT0002807	hsa-miR-491-5p	NM_001458	FLNC	circRNA	chr7	128485218	128485239	+	1	0	AGO1-4	7mer-m8	ggaguaccuucccAAGGGGUGa	ucccgugcccaaaUUCCCCACc
MIMAT0002807	hsa-miR-491-5p	NM_001458	FLNC	circRNA	chr7	128498715	128498736	+	1	0	AGO1-4	7mer-m8	ggaguaccuucccaAGGGGUGa	gugaaggcccagccUCCCCACc
MIMAT0002807	hsa-miR-491-5p	NR_034053	TNPO3	circRNA	chr7	128614999	128615016	-	1	0	AGO2	7mer-m8	ggaguaccuucccaAGGGGUGa	#NAME?
MIMAT0002807	hsa-miR-491-5p	NR_034053	TNPO3	circRNA	chr7	128658092	128658114	-	5	0	AGO1-4,AGO2	8mer	ggAGU-ACCUUCCCAAGGGGUGa	ccUCAUUUUAUGAGCUCCCCACa
MIMAT0002807	hsa-miR-491-5p	hsa_circ_0001741	hsa_circ_002157	circRNA	chr7	128658092	128658114	-	5	0	AGO1-4,AGO2	8mer	ggAGU-ACCUUCCCAAGGGGUGa	ccUCAUUUUAUGAGCUCCCCACa
MIMAT0002807	hsa-miR-491-5p	NM_016352	CPA4	circRNA	chr7	129962432	129962453	+	2	0	AGO2	7mer-m8	ggaguaccuucccaAGGGGUGa	agcuaaccagaucaUCCCCACu
MIMAT0002807	hsa-miR-491-5p	NR_034120	LOC646329	circRNA	chr7	130570068	130570089	-	1	0	AGO1-4	7mer-m8	ggaguaccuucccaAGGGGUGa	ucugggcaacaucaUCCCCACu
MIMAT0002807	hsa-miR-491-5p	NM_001018111	PODXL	circRNA	chr7	131196089	131196109	-	4	0	AGO1-4,AGO2	7mer-m8	ggaGUACCUUCCCAAGGGGUGa	cagCAGAGCACAG-UCCCCACu
MIMAT0002807	hsa-miR-491-5p	NM_001190848	CNOT4	circRNA	chr7	135080439	135080460	-	1	0	AGO1-4	8mer	ggaguaccuuccCAAGGGGUGa	cuccuuuccccaGCUCCCCACa
MIMAT0002807	hsa-miR-491-5p	NM_001190850	CNOT4	circRNA	chr7	135080439	135080460	-	1	0	AGO1-4	8mer	ggaguaccuuccCAAGGGGUGa	cuccuuuccccaGCUCCCCACa
MIMAT0002807	hsa-miR-491-5p	NM_194071	CREB3L2	circRNA	chr7	137564538	137564559	-	11	0	AGO1-4,AGO2	8mer	ggaguaccuucCCAAGGGGUGa	ucccacaaccuGGUUCCCCACa
MIMAT0002807	hsa-miR-491-5p	NM_022740	HIPK2	circRNA	chr7	139253806	139253827	-	3	0	AGO1-4,AGO2	7mer-m8	ggaguacCUUCCCAAGGGGUGa	ccccucuGAAAGCAUCCCCACu
MIMAT0002807	hsa-miR-491-5p	NM_022740	HIPK2	circRNA	chr7	139254123	139254144	-	4	0	AGO2	8mer	ggaguaccuucCCAAGGGGUGa	ugaccccauccGCUUCCCCACa
MIMAT0002807	hsa-miR-491-5p	NM_022740	HIPK2	circRNA	chr7	139255346	139255365	-	11	0	AGO1-4,AGO2	7mer-m8	ggAGUACCUUCCCAAGGGGUGa	acUC-UGGAA-ACUUCCCCACc
MIMAT0002807	hsa-miR-491-5p	NM_022740	HIPK2	circRNA	chr7	139256182	139256203	-	5	0	AGO1-4,AGO2	7mer-m8	ggaguacCUUCCCAAGGGGUGa	aggcccaGAGAGACUCCCCACc
MIMAT0002807	hsa-miR-491-5p	NM_022740	HIPK2	circRNA	chr7	139257976	139257997	-	2	0	AGO2	7mer-m8	ggaguaccuucccaAGGGGUGa	ugccgcugcccaccUCCCCACc
MIMAT0002807	hsa-miR-491-5p	NM_022740	HIPK2	circRNA	chr7	139281694	139281716	-	4	0	AGO1-4	8mer	ggAGUAC-CUUCCCAAGGGGUGa	ucUCAGGCCAUCAGCUCCCCACa
MIMAT0002807	hsa-miR-491-5p	NM_022740	HIPK2	circRNA	chr7	139311354	139311375	-	2	0	AGO2	8mer	ggaguaccuucccAAGGGGUGa	cacuuacucgauuUUCCCCACa
MIMAT0002807	hsa-miR-491-5p	NM_004546	NDUFB2	circRNA	chr7	140399428	140399449	+	2	0	AGO1-4	8mer	ggaguaccuucccAAGGGGUGa	aggcugcgucucuUUCCCCACa
MIMAT0002807	hsa-miR-491-5p	NM_001203249	EZH2	circRNA	chr7	148580547	148580568	-	2	0	AGO2	7mer-m8	ggaGUACCUUCCCAAGGGGUGa	ucgCCUCUGACGUUUCCCCACg
MIMAT0002807	hsa-miR-491-5p	NM_004911	PDIA4	circRNA	chr7	148701018	148701039	-	3	0	AGO1-4,AGO2	7mer-m8	ggagUACCUUCCCAAGGGGUGa	uaagGUGGAGGGCUUCCCCACc
MIMAT0002807	hsa-miR-491-5p	TCONS_l2_00026970	TCONS_l2_00026970	circRNA	chr7	149767005	149767025	-	1	0	AGO1-4	7mer-m8	ggaGUACCUUCCCAAGGGGUGa	cagCAU-GUGGACUUCCCCACu
MIMAT0002807	hsa-miR-491-5p	TCONS_l2_00026970	TCONS_l2_00026970	circRNA	chr7	149977601	149977622	-	1	0	AGO2	7mer-m8	ggaguaccuucccaAGGGGUGa	cuuugacuaacaucUCCCCACu
MIMAT0002807	hsa-miR-491-5p	NM_001142928	LRRC61	circRNA	chr7	150034865	150034886	+	2	0	AGO2	7mer-m8	ggaguaccuucccaAGGGGUGa	cugagagcagccccUCCCCACc
MIMAT0002807	hsa-miR-491-5p	NM_001199692	SLC4A2	circRNA	chr7	150763775	150763796	+	6	0	AGO1-4	7mer-m8	ggaguaccuucCCAAGGGGUGa	acugcugccccGGGUCCCCACg
MIMAT0002807	hsa-miR-491-5p	NM_001199693	SLC4A2	circRNA	chr7	150763775	150763796	+	6	0	AGO1-4	7mer-m8	ggaguaccuucCCAAGGGGUGa	acugcugccccGGGUCCCCACg
MIMAT0002807	hsa-miR-491-5p	NM_006712	FASTK	circRNA	chr7	150775759	150775781	-	4	0	AGO1-4,AGO2	7mer-m8	ggaguaCCUU-CCCAAGGGGUGa	gccagaGGAACUGACUCCCCACg
MIMAT0002807	hsa-miR-491-5p	NM_031946	AGAP3	circRNA	chr7	150837107	150837128	+	1	0	AGO1-4	7mer-m8	ggaguaccuucccaAGGGGUGa	gauccucccccaucUCCCCACu
MIMAT0002807	hsa-miR-491-5p	NM_170606	MLL3	circRNA	chr7	151945411	151945431	-	3	0	AGO1-4	8mer	ggaguaccuUCCCAAGGGGUGa	agaaaccuuAGUG-UCCCCACa
MIMAT0002807	hsa-miR-491-5p	NM_014671	UBE3C	circRNA	chr7	157060317	157060338	+	5	0	AGO1,AGO1-4,AGO2	8mer	ggaGUACCUUCCCAAGGGGUGa	cgaCCUUGAGCGGCUCCCCACa
MIMAT0002807	hsa-miR-491-5p	NM_003747	TNKS	circRNA	chr8	9637686	9637708	+	3	0	AGO1,AGO1-4,AGO2	7mer-m8	ggAGUACCUUCCCA-AGGGGUGa	ggUUAUUGGGCAUUGUCCCCACc
MIMAT0002807	hsa-miR-491-5p	NM_006094	DLC1	circRNA	chr8	12990518	12990539	-	1	0	AGO1-4	8mer	ggaguaccuucccAAGGGGUGa	cgccugccucgacUUCCCCACa
MIMAT0002807	hsa-miR-491-5p	NM_015310	PSD3	circRNA	chr8	18582172	18582193	-	1	0	AGO1-4	7mer-m8	ggaguaccuuccCAAGGGGUGa	cuucccccgccaGGUCCCCACc
MIMAT0002807	hsa-miR-491-5p	NM_206909	PSD3	circRNA	chr8	18681997	18682018	-	1	0	AGO1-4	8mer	ggaguaccuucccaAGGGGUGa	cugauuuuguuuaaUCCCCACa
MIMAT0002807	hsa-miR-491-5p	NM_021174	KIAA1967	circRNA	chr8	22473603	22473628	+	2	0	AGO1-4	7mer-m8	ggAGUACCUUCCCA----AGGGGUGa	cuUCCUGAAAAGGUCGUGUCCCCACc
MIMAT0002807	hsa-miR-491-5p	NM_018688	BIN3	circRNA	chr8	22478746	22478768	-	2	0	AGO1-4	7mer-m8	ggaGUACCUUCCCA-AGGGGUGa	aggCAGGCCGCCGUCUCCCCACu
MIMAT0002807	hsa-miR-491-5p	NM_152272	CHMP7	circRNA	chr8	23119154	23119175	+	1	1	AGO1-4	7mer-m8	ggaguaccuucccaAGGGGUGa	ccugcuuccugcagUCCCCACu
MIMAT0002807	hsa-miR-491-5p	NM_001197293	DPYSL2	circRNA	chr8	26501039	26501060	+	1	0	AGO1-4	7mer-m8	ggaguaccuucccaAGGGGUGa	cugccuuugucaccUCCCCACc
MIMAT0002807	hsa-miR-491-5p	NM_001244604	DPYSL2	circRNA	chr8	26501039	26501060	+	1	0	AGO1-4	7mer-m8	ggaguaccuucccaAGGGGUGa	cugccuuugucaccUCCCCACc
MIMAT0002807	hsa-miR-491-5p	NM_001386	DPYSL2	circRNA	chr8	26501039	26501060	+	1	0	AGO1-4	7mer-m8	ggaguaccuucccaAGGGGUGa	cugccuuugucaccUCCCCACc
MIMAT0002807	hsa-miR-491-5p	NM_001197293	DPYSL2	circRNA	chr8	26509796	26509822	+	4	0	AGO1-4	7mer-m8	ggaGUACCUU----C-CCAAGGGGUGa	aggCAUGGAGUGCCGCGGCUCCCCACu
MIMAT0002807	hsa-miR-491-5p	NM_001244604	DPYSL2	circRNA	chr8	26509796	26509822	+	4	0	AGO1-4	7mer-m8	ggaGUACCUU----C-CCAAGGGGUGa	aggCAUGGAGUGCCGCGGCUCCCCACu
MIMAT0002807	hsa-miR-491-5p	NM_171982	TRIM35	circRNA	chr8	27144053	27144073	-	1	0	AGO1	7mer-m8	ggaGUACCUUCCCAAGGGGUGa	ugcCA-GGCCUGUUUCCCCACc
MIMAT0002807	hsa-miR-491-5p	NM_173174	PTK2B	circRNA	chr8	27316152	27316173	+	1	0	AGO1-4	7mer-m8	ggaguaccuucccaAGGGGUGa	ugcacgacgcccucUCCCCACc
MIMAT0002807	hsa-miR-491-5p	NM_018660	ZNF395	circRNA	chr8	28332475	28332495	-	1	0	AGO1-4	7mer-m8	ggAGUACCUUCCCAAGGGGUGa	ucUC-UGCCACGUGUCCCCACg
MIMAT0002807	hsa-miR-491-5p	NM_001440	EXTL3	circRNA	chr8	28608579	28608600	+	3	0	AGO1-4,AGO2	8mer	ggaguaccuUCCCAAGGGGUGa	ggaguccccGGGGUUCCCCACa
MIMAT0002807	hsa-miR-491-5p	NM_018250	INTS9	circRNA	chr8	28654104	28654125	-	1	0	AGO2	7mer-m8	ggaguaccuuccCAAGGGGUGa	agggcuuacccaGAUCCCCACu
MIMAT0002807	hsa-miR-491-5p	NM_001135726	HMBOX1	circRNA	chr8	28827846	28827865	+	4	0	AGO1-4,AGO2	8mer	ggAGUACCUUCCCAAGGGGUGa	agUUAUG--AUACUUCCCCACa
MIMAT0002807	hsa-miR-491-5p	NM_024567	HMBOX1	circRNA	chr8	28827846	28827865	+	4	0	AGO1-4,AGO2	8mer	ggAGUACCUUCCCAAGGGGUGa	agUUAUG--AUACUUCCCCACa
MIMAT0002807	hsa-miR-491-5p	NM_004874	BAG4	circRNA	chr8	38069492	38069513	+	1	0	AGO1-4	7mer-m8	ggaguaccuUCCCAAGGGGUGa	aaaucuauuAGCUGUCCCCACu
MIMAT0002807	hsa-miR-491-5p	NM_023034	WHSC1L1	circRNA	chr8	38162854	38162875	-	4	0	AGO1-4,AGO2	7mer-m8	ggaguaccuucccAAGGGGUGa	cuguguccgcaaaUUCCCCACu
MIMAT0002807	hsa-miR-491-5p	NM_001146216	TACC1	circRNA	chr8	38677964	38677985	+	3	0	AGO1-4,AGO2	7mer-m8	ggaguacCUUCCCAAGGGGUGa	cuguucuGCAGAACUCCCCACc
MIMAT0002807	hsa-miR-491-5p	NM_006283	TACC1	circRNA	chr8	38677964	38677985	+	3	0	AGO1-4,AGO2	7mer-m8	ggaguacCUUCCCAAGGGGUGa	cuguucuGCAGAACUCCCCACc
MIMAT0002807	hsa-miR-491-5p	NM_021623	PLEKHA2	circRNA	chr8	38809740	38809761	+	2	0	AGO1-4,AGO2	7mer-m8	ggaguaccuucccaAGGGGUGa	gucucagaguuacaUCCCCACg
MIMAT0002807	hsa-miR-491-5p	NM_178819	AGPAT6	circRNA	chr8	41478788	41478811	+	4	0	AGO1,AGO1-4,AGO2	7mer-m8	ggaGUACCUUCCC--AAGGGGUGa	ugcCAUUAAAGUGAACUCCCCACc
MIMAT0002807	hsa-miR-491-5p	NR_033818	IKBKB	circRNA	chr8	42175239	42175260	+	6	0	AGO1-4,AGO2	7mer-m8	ggaguaccuUCCCAAGGGGUGa	augagacucAGAUCUCCCCACg
MIMAT0002807	hsa-miR-491-5p	NM_001083617	RB1CC1	circRNA	chr8	53570443	53570464	-	8	0	AGO1-4,AGO2	8mer	ggaguaccuUCCCAAGGGGUGa	cugugagucAGACAUCCCCACa
MIMAT0002807	hsa-miR-491-5p	NM_014781	RB1CC1	circRNA	chr8	53570443	53570464	-	8	0	AGO1-4,AGO2	8mer	ggaguaccuUCCCAAGGGGUGa	cugugagucAGACAUCCCCACa
MIMAT0002807	hsa-miR-491-5p	NM_015941	ATP6V1H	circRNA	chr8	54754203	54754227	-	13	0	AGO1-4,AGO2	7mer-m8	ggaGUACCUUC--CCA-AGGGGUGa	ugcUGUGGAUGCUGCUGUCCCCACc
MIMAT0002807	hsa-miR-491-5p	NM_006421	ARFGEF1	circRNA	chr8	68107510	68107531	-	1	0	AGO1-4	8mer	ggaguaccuucccAAGGGGUGa	uacaacucagcauUUCCCCACa
MIMAT0002807	hsa-miR-491-5p	NM_016033	FAM82B	circRNA	chr8	87510111	87510132	-	1	0	AGO1-4	7mer-m8	ggaguaccuucccaAGGGGUGa	aggcugucucgaacUCCCCACu
MIMAT0002807	hsa-miR-491-5p	NM_017697	ESRP1	circRNA	chr8	95686692	95686717	+	1	0	AGO1-4	7mer-m8	ggagUACCUU--CCCA--AGGGGUGa	uuaaAUCGAAAUGGCUUAUCCCCACc
MIMAT0002807	hsa-miR-491-5p	NM_015942	MTERFD1	circRNA	chr8	97256170	97256189	-	1	0	AGO1-4	7mer-m8	ggAGUACCUUCCCAAGGGGUGa	ugUGAUG--AGCAUUCCCCACc
MIMAT0002807	hsa-miR-491-5p	NM_018407	LAPTM4B	circRNA	chr8	98864433	98864455	+	3	0	AGO2	7mer-m8	ggAGUACCU-UCCCAAGGGGUGa	ucUCCUGGAUUCACAUCCCCACc
MIMAT0002807	hsa-miR-491-5p	NM_017890	VPS13B	circRNA	chr8	100796682	100796703	+	2	0	AGO2	8mer	ggaguaccuucccaAGGGGUGa	ggcgcucucacaaaUCCCCACa
MIMAT0002807	hsa-miR-491-5p	NM_017890	VPS13B	circRNA	chr8	100888193	100888214	+	2	0	AGO1-4,AGO2	7mer-m8	ggaguaccuucccAAGGGGUGa	aaaaacguguuccUUCCCCACu
MIMAT0002807	hsa-miR-491-5p	NM_030780	SLC25A32	circRNA	chr8	104410978	104410999	-	6	0	AGO1-4,AGO2	8mer	ggAGUACCUUCCCAAGGGGUGa	aaUCUUGAUAUUAGUCCCCACa
MIMAT0002807	hsa-miR-491-5p	NM_030780	SLC25A32	circRNA	chr8	104415465	104415486	-	15	0	AGO1,AGO1-4,AGO2	8mer	ggaguaccuucccaAGGGGUGa	augcuguuguuaacUCCCCACa
MIMAT0002807	hsa-miR-491-5p	NM_001247996	ASAP1	circRNA	chr8	131314922	131314941	-	1	0	AGO1-4	7mer-m8	ggaGUACCUUCCCAAGGGGUGa	aaaCUUGAGAUG--UCCCCACg
MIMAT0002807	hsa-miR-491-5p	NM_001247996	ASAP1	circRNA	chr8	131331677	131331697	-	2	0	AGO1-4	7mer-m8	ggaGUACCUUCCCAAGGGGUGa	gggCCUGG-AGCAAUCCCCACc
MIMAT0002807	hsa-miR-491-5p	NM_001247996	ASAP1	circRNA	chr8	131357099	131357120	-	1	0	AGO1-4	7mer-m8	ggaguaccuucccaAGGGGUGa	uagauucuccuuccUCCCCACc
MIMAT0002807	hsa-miR-491-5p	NM_001247996	ASAP1	circRNA	chr8	131414823	131414844	-	1	0	AGO2	7mer-m8	ggaguaccuucccaAGGGGUGa	aauuuauuuuuauaUCCCCACc
MIMAT0002807	hsa-miR-491-5p	NM_001247996	ASAP1	circRNA	chr8	131421580	131421601	-	2	0	AGO1-4	7mer-m8	ggaguaccuucccaAGGGGUGa	cgauuaguacaaaaUCCCCACg
MIMAT0002807	hsa-miR-491-5p	hsa_circ_0001826	hsa_circ_001609	circRNA	chr8	141359002	141359021	-	1	0	AGO1-4	7mer-m8	ggAGUACCUUCCCAAGGGGUGa	caUCCUGGAA--CUUCCCCACu
MIMAT0002807	hsa-miR-491-5p	hsa_circ_0001826	hsa_circ_001609	circRNA	chr8	141367351	141367372	-	1	0	AGO1-4	8mer	ggaguaccuucccaAGGGGUGa	gugcaccuccccugUCCCCACa
MIMAT0002807	hsa-miR-491-5p	NM_017444	CHRAC1	circRNA	chr8	141526892	141526913	+	1	0	AGO1-4	7mer-m8	ggaguaccuucccAAGGGGUGa	uguggucagcuccUUCCCCACc
MIMAT0002807	hsa-miR-491-5p	NM_016647	C8orf55	circRNA	chr8	143817697	143817718	+	1	0	AGO1-4	7mer-m8	ggaguACCUUCCCAAGGGGUGa	gugacUUGGGCUGAUCCCCACc
MIMAT0002807	hsa-miR-491-5p	NM_052924	RHPN1	circRNA	chr8	144462236	144462257	+	2	0	AGO2	7mer-m8	ggaGUACCUUCCCAAGGGGUGa	gacCGAGGGAGAGCUCCCCACg
MIMAT0002807	hsa-miR-491-5p	NM_052924	RHPN1	circRNA	chr8	144464870	144464891	+	1	0	AGO1-4	7mer-m8	ggaGUACCUUCCCAAGGGGUGa	cacCGAGCAUGCCCUCCCCACc
MIMAT0002807	hsa-miR-491-5p	NM_052924	RHPN1	circRNA	chr8	144465350	144465372	+	1	0	AGO1-4	7mer-m8	ggaguaCCUUCCC-AAGGGGUGa	cacagaGCAAGGGACUCCCCACc
MIMAT0002807	hsa-miR-491-5p	NM_015117	ZC3H3	circRNA	chr8	144520009	144520030	-	1	0	AGO1-4	7mer-m8	ggaguaccuucccaAGGGGUGa	aagccaggccccugUCCCCACc
MIMAT0002807	hsa-miR-491-5p	NM_003313	TSTA3	circRNA	chr8	144694862	144694883	-	1	1	AGO2	8mer	ggaguaccuuccCAAGGGGUGa	gcccggcgcuuuGCUCCCCACa
MIMAT0002807	hsa-miR-491-5p	NM_003313	TSTA3	circRNA	chr8	144696575	144696596	-	1	0	AGO2	7mer-m8	ggAGUACCUUCCCAAGGGGUGa	cuUCACCGCUGUCAUCCCCACc
MIMAT0002807	hsa-miR-491-5p	NM_003313	TSTA3	circRNA	chr8	144696846	144696867	-	2	0	AGO2	8mer	ggaguaccuUCCCAAGGGGUGa	auccacaauGGGCCUCCCCACa
MIMAT0002807	hsa-miR-491-5p	NM_198488	FAM83H	circRNA	chr8	144806753	144806774	-	2	4	AGO1-4	7mer-m8	ggaguaccuucccaAGGGGUGa	cagacaccccccucUCCCCACc
MIMAT0002807	hsa-miR-491-5p	hsa_circ_0085990	hsa_circ_0085990	circRNA	chr8	145317222	145317243	-	3	0	AGO1-4	8mer	ggaguaccuucccaAGGGGUGa	cugagcccuccucgUCCCCACa
MIMAT0002807	hsa-miR-491-5p	hsa_circ_0085991	hsa_circ_0085991	circRNA	chr8	145317222	145317243	-	3	0	AGO1-4	8mer	ggaguaccuucccaAGGGGUGa	cugagcccuccucgUCCCCACa
MIMAT0002807	hsa-miR-491-5p	hsa_circ_0085992	hsa_circ_0085992	circRNA	chr8	145317222	145317243	-	3	0	AGO1-4	8mer	ggaguaccuucccaAGGGGUGa	cugagcccuccucgUCCCCACa
MIMAT0002807	hsa-miR-491-5p	hsa_circ_0085993	hsa_circ_0085993	circRNA	chr8	145317222	145317243	-	3	0	AGO1-4	8mer	ggaguaccuucccaAGGGGUGa	cugagcccuccucgUCCCCACa
MIMAT0002807	hsa-miR-491-5p	hsa_circ_0085994	hsa_circ_0085994	circRNA	chr8	145317222	145317243	-	3	0	AGO1-4	8mer	ggaguaccuucccaAGGGGUGa	cugagcccuccucgUCCCCACa
MIMAT0002807	hsa-miR-491-5p	hsa_circ_0085995	hsa_circ_0085995	circRNA	chr8	145317222	145317243	-	3	0	AGO1-4	8mer	ggaguaccuucccaAGGGGUGa	cugagcccuccucgUCCCCACa
MIMAT0002807	hsa-miR-491-5p	hsa_circ_0085996	hsa_circ_0085996	circRNA	chr8	145317222	145317243	-	3	0	AGO1-4	8mer	ggaguaccuucccaAGGGGUGa	cugagcccuccucgUCCCCACa
MIMAT0002807	hsa-miR-491-5p	hsa_circ_0085997	hsa_circ_0085997	circRNA	chr8	145317222	145317243	-	3	0	AGO1-4	8mer	ggaguaccuucccaAGGGGUGa	cugagcccuccucgUCCCCACa
MIMAT0002807	hsa-miR-491-5p	hsa_circ_0085998	hsa_circ_0085998	circRNA	chr8	145317222	145317243	-	3	0	AGO1-4	8mer	ggaguaccuucccaAGGGGUGa	cugagcccuccucgUCCCCACa
MIMAT0002807	hsa-miR-491-5p	hsa_circ_0085999	hsa_circ_0085999	circRNA	chr8	145317222	145317243	-	3	0	AGO1-4	8mer	ggaguaccuucccaAGGGGUGa	cugagcccuccucgUCCCCACa
MIMAT0002807	hsa-miR-491-5p	hsa_circ_0086000	hsa_circ_0086000	circRNA	chr8	145317222	145317243	-	3	0	AGO1-4	8mer	ggaguaccuucccaAGGGGUGa	cugagcccuccucgUCCCCACa
MIMAT0002807	hsa-miR-491-5p	hsa_circ_0086001	hsa_circ_0086001	circRNA	chr8	145317222	145317243	-	3	0	AGO1-4	8mer	ggaguaccuucccaAGGGGUGa	cugagcccuccucgUCCCCACa
MIMAT0002807	hsa-miR-491-5p	hsa_circ_0085995	hsa_circ_0085995	circRNA	chr8	145318746	145318767	-	1	0	AGO1-4	7mer-m8	ggaGUACCUUCCCAAGGGGUGa	ggaCCUGCAGCCCUUCCCCACg
MIMAT0002807	hsa-miR-491-5p	hsa_circ_0085996	hsa_circ_0085996	circRNA	chr8	145318746	145318767	-	1	0	AGO1-4	7mer-m8	ggaGUACCUUCCCAAGGGGUGa	ggaCCUGCAGCCCUUCCCCACg
MIMAT0002807	hsa-miR-491-5p	hsa_circ_0085997	hsa_circ_0085997	circRNA	chr8	145318746	145318767	-	1	0	AGO1-4	7mer-m8	ggaGUACCUUCCCAAGGGGUGa	ggaCCUGCAGCCCUUCCCCACg
MIMAT0002807	hsa-miR-491-5p	hsa_circ_0085998	hsa_circ_0085998	circRNA	chr8	145318746	145318767	-	1	0	AGO1-4	7mer-m8	ggaGUACCUUCCCAAGGGGUGa	ggaCCUGCAGCCCUUCCCCACg
MIMAT0002807	hsa-miR-491-5p	hsa_circ_0085999	hsa_circ_0085999	circRNA	chr8	145318746	145318767	-	1	0	AGO1-4	7mer-m8	ggaGUACCUUCCCAAGGGGUGa	ggaCCUGCAGCCCUUCCCCACg
MIMAT0002807	hsa-miR-491-5p	hsa_circ_0086000	hsa_circ_0086000	circRNA	chr8	145318746	145318767	-	1	0	AGO1-4	7mer-m8	ggaGUACCUUCCCAAGGGGUGa	ggaCCUGCAGCCCUUCCCCACg
MIMAT0002807	hsa-miR-491-5p	hsa_circ_0086001	hsa_circ_0086001	circRNA	chr8	145318746	145318767	-	1	0	AGO1-4	7mer-m8	ggaGUACCUUCCCAAGGGGUGa	ggaCCUGCAGCCCUUCCCCACg
MIMAT0002807	hsa-miR-491-5p	hsa_circ_0086003	hsa_circ_0086003	circRNA	chr8	145318746	145318767	-	1	0	AGO1-4	7mer-m8	ggaGUACCUUCCCAAGGGGUGa	ggaCCUGCAGCCCUUCCCCACg
MIMAT0002807	hsa-miR-491-5p	hsa_circ_0086004	hsa_circ_0086004	circRNA	chr8	145318746	145318767	-	1	0	AGO1-4	7mer-m8	ggaGUACCUUCCCAAGGGGUGa	ggaCCUGCAGCCCUUCCCCACg
MIMAT0002807	hsa-miR-491-5p	hsa_circ_0086005	hsa_circ_0086005	circRNA	chr8	145318746	145318767	-	1	0	AGO1-4	7mer-m8	ggaGUACCUUCCCAAGGGGUGa	ggaCCUGCAGCCCUUCCCCACg
MIMAT0002807	hsa-miR-491-5p	NM_015201	BOP1	circRNA	chr8	145487832	145487853	-	1	0	AGO1-4	7mer-m8	ggaGUACCUUCCCAAGGGGUGa	ggaCCUGCAGCCCUUCCCCACg
MIMAT0002807	hsa-miR-491-5p	NM_183057	VPS28	circRNA	chr8	145649022	145649043	-	9	0	AGO1,AGO1-4,AGO2	8mer	ggaguaccuucccaAGGGGUGa	gggggccgggccccUCCCCACa
MIMAT0002807	hsa-miR-491-5p	NM_032902	PPP1R16A	circRNA	chr8	145727322	145727346	+	1	0	AGO2	7mer-m8	ggaguaccUUCCCA---AGGGGUGa	cacagcccAAGGCUGCCUCCCCACg
MIMAT0002807	hsa-miR-491-5p	NM_138431	MFSD3	circRNA	chr8	145735300	145735320	+	1	0	AGO1	8mer	ggAGUACCUUCCCAAGGGGUGa	cuUCCGAGCAGCG-UCCCCACa
MIMAT0002807	hsa-miR-491-5p	NM_001001795	C8orf82	circRNA	chr8	145752535	145752556	-	1	0	AGO1-4	7mer-m8	ggaguaccuuccCAAGGGGUGa	cccggacaccccGCUCCCCACg
MIMAT0002807	hsa-miR-491-5p	NM_003416	ZNF7	circRNA	chr8	146066810	146066833	+	1	0	AGO2	8mer	ggagUACC-UUCCCA-AGGGGUGa	gacaGUGGUCAGAAUCUCCCCACa
MIMAT0002807	hsa-miR-491-5p	NM_021061	ZNF250	circRNA	chr8	146100984	146101005	-	1	0	AGO1-4	7mer-m8	ggaguaccuucccaAGGGGUGa	aaagguucuccaagUCCCCACu
MIMAT0002807	hsa-miR-491-5p	NM_021061	ZNF250	circRNA	chr8	146101103	146101124	-	1	0	AGO1-4	7mer-m8	ggaguaccuucccaAGGGGUGa	aaagauucuccaagUCCCCACc
MIMAT0002807	hsa-miR-491-5p	NR_023392	ZNF252	circRNA	chr8	146199043	146199064	-	2	0	AGO1-4	7mer-m8	ggaguaccuucccAAGGGGUGa	ugugcugccaaucUUCCCCACc
MIMAT0002807	hsa-miR-491-5p	NM_153186	KANK1	circRNA	chr9	647538	647559	+	1	0	AGO1-4	7mer-m8	ggaguaccuucccaAGGGGUGa	gaaaauauauuuaaUCCCCACu
MIMAT0002807	hsa-miR-491-5p	NM_153186	KANK1	circRNA	chr9	730166	730187	+	1	0	AGO1-4	7mer-m8	ggaGUACCUUCCCAAGGGGUGa	cagCCUGGAUGCCUUCCCCACu
MIMAT0002807	hsa-miR-491-5p	NM_001042413	GLIS3	circRNA	chr9	4259986	4260007	-	1	0	AGO2	7mer-m8	ggaguaccuucccAAGGGGUGa	cccuugcuuaaauUUCCCCACu
MIMAT0002807	hsa-miR-491-5p	NM_000170	GLDC	circRNA	chr9	6554703	6554724	-	2	0	AGO1-4,AGO2	7mer-m8	ggaguaccuucccAAGGGGUGa	aagaccuucugcaUUCCCCACg
MIMAT0002807	hsa-miR-491-5p	NM_001190737	NFIB	circRNA	chr9	14087456	14087477	-	13	0	AGO1,AGO1-4,AGO2	8mer	ggaguaccuucccAAGGGGUGa	uuaauauaauauuUUCCCCACa
MIMAT0002807	hsa-miR-491-5p	NM_001190737	NFIB	circRNA	chr9	14120507	14120528	-	11	0	AGO1,AGO1-4,AGO2	7mer-m8	ggaguaccuucccaAGGGGUGa	acaaucagauauccUCCCCACc
MIMAT0002807	hsa-miR-491-5p	NM_001190737	NFIB	circRNA	chr9	14307083	14307100	-	14	0	AGO1,AGO1-4,AGO2	8mer	ggAGUACCUUCCCAAGGGGUGa	gcUCAUGAAA----UCCCCACa
MIMAT0002807	hsa-miR-491-5p	NM_001497	B4GALT1	circRNA	chr9	33111474	33111495	-	12	0	AGO1,AGO1-4,AGO2,AGO3	7mer-m8	ggaguaccuuccCAAGGGGUGa	auuucucugucaGUUCCCCACu
MIMAT0002807	hsa-miR-491-5p	NM_018449	UBAP2	circRNA	chr9	33921712	33921733	-	2	1	AGO1,AGO2	7mer-m8	ggaguaccuucccaAGGGGUGa	uuucucuugcccaaUCCCCACc
MIMAT0002807	hsa-miR-491-5p	NM_020702	KIAA1161	circRNA	chr9	34369214	34369236	-	1	0	AGO2	7mer-m8	ggagUACCU-UCCCAAGGGGUGa	gagaAUGCAUCCGUUUCCCCACc
MIMAT0002807	hsa-miR-491-5p	NM_147157	SIGMAR1	circRNA	chr9	34635273	34635294	-	2	0	AGO1-4	7mer-m8	ggaguaccuucccaAGGGGUGa	agcuucccaccuccUCCCCACc
MIMAT0002807	hsa-miR-491-5p	NM_006289	TLN1	circRNA	chr9	35697457	35697478	-	19	2	AGO1-4,AGO2	8mer	ggaguaccuucccaAGGGGUGa	cagcuuccggccagUCCCCACa
MIMAT0002807	hsa-miR-491-5p	NM_032226	ZCCHC7	circRNA	chr9	37191552	37191576	+	3	0	AGO1-4,AGO2	7mer-m8	ggAGUACCU-UCCCA--AGGGGUGa	ucUGAUUGAGAGACUAAUCCCCACc
MIMAT0002807	hsa-miR-491-5p	NM_022490	POLR1E	circRNA	chr9	37500839	37500863	+	8	0	AGO1-4,AGO2	8mer	ggAGUACCUU---CC-CAAGGGGUGa	gcUC-UGGGACCUGGAGUUCCCCACa
MIMAT0002807	hsa-miR-491-5p	NM_024345	DCAF10	circRNA	chr9	37861276	37861297	+	3	0	AGO1-4,AGO2	8mer	ggaguaccuucccAAGGGGUGa	gacgaaugauuucUUCCCCACa
MIMAT0002807	hsa-miR-491-5p	NM_024345	DCAF10	circRNA	chr9	37865841	37865862	+	1	0	AGO1-4	7mer-m8	ggagUACCUUCCCAAGGGGUGa	guaaAUUCAUGUGUUCCCCACu
MIMAT0002807	hsa-miR-491-5p	NM_001206	KLF9	circRNA	chr9	73028925	73028946	-	1	0	AGO1-4	7mer-m8	ggaguaccuucccaAGGGGUGa	gaguugaaucacccUCCCCACu
MIMAT0002807	hsa-miR-491-5p	NM_002072	GNAQ	circRNA	chr9	80412483	80412504	-	1	0	AGO1-4	7mer-m8	ggaguaccuucccaAGGGGUGa	gcuuagaguucgagUCCCCACc
MIMAT0002807	hsa-miR-491-5p	NM_006717	SPIN1	circRNA	chr9	91032130	91032147	+	2	0	AGO1-4	7mer-m8	ggAGUACCUUCCCAAGGGGUGa	auUUAUGUAA----UCCCCACu
MIMAT0002807	hsa-miR-491-5p	NM_006378	SEMA4D	circRNA	chr9	91993724	91993742	-	1	0	AGO1-4	7mer-m8	ggaGUACCUUCCCAAGGGGUGa	cacCA-GCAAAG--UCCCCACg
MIMAT0002807	hsa-miR-491-5p	NM_014788	TRIM14	circRNA	chr9	100849284	100849305	-	1	0	AGO1-4	7mer-m8	ggaguaccuucccaAGGGGUGa	aaucuuccgcuuccUCCCCACc
MIMAT0002807	hsa-miR-491-5p	NM_014425	INVS	circRNA	chr9	103054998	103055021	+	1	0	AGO2	7mer-m8	ggaguaCCUUCCCA--AGGGGUGa	augcugGGCAGAAUCCUCCCCACc
MIMAT0002807	hsa-miR-491-5p	NM_001079802	FKTN	circRNA	chr9	108400260	108400282	+	2	0	AGO1-4	8mer	ggaguaccuuccCA-AGGGGUGa	gaauguuugccaGUAUCCCCACa
MIMAT0002807	hsa-miR-491-5p	NM_001136562	AKAP2	circRNA	chr9	112859660	112859681	+	1	0	AGO1-4	7mer-m8	ggaguaccuucccAAGGGGUGa	auuucucaaucuuUUCCCCACc
MIMAT0002807	hsa-miR-491-5p	NM_153366	SVEP1	circRNA	chr9	113168503	113168524	-	1	0	AGO1-4	7mer-m8	ggAGUACCUUCCCAAGGGGUGa	ccUUGUCCUGUGGGUCCCCACc
MIMAT0002807	hsa-miR-491-5p	NM_153366	SVEP1	circRNA	chr9	113169574	113169598	-	1	0	AGO1-4	7mer-m8	ggagUACCUUCCCA---AGGGGUGa	gaaaGUGGAGUGGUGCCUCCCCACg
MIMAT0002807	hsa-miR-491-5p	NM_153366	SVEP1	circRNA	chr9	113170201	113170222	-	1	0	AGO1-4	8mer	ggaguaccuucCCAAGGGGUGa	ccauccacuguGAUUCCCCACa
MIMAT0002807	hsa-miR-491-5p	NM_003358	UGCG	circRNA	chr9	114659336	114659357	+	1	0	AGO1-4	7mer-m8	ggaguaccuucccaAGGGGUGa	gcccgccccuuccgUCCCCACc
MIMAT0002807	hsa-miR-491-5p	NM_003358	UGCG	circRNA	chr9	114659362	114659383	+	2	0	AGO1-4	7mer-m8	ggaguaccuucccaAGGGGUGa	uccgcccuuuccucUCCCCACc
MIMAT0002807	hsa-miR-491-5p	NM_032888	COL27A1	circRNA	chr9	116931389	116931410	+	1	0	AGO1-4	7mer-m8	ggaguaccuucccaAGGGGUGa	aacagcaccugccgUCCCCACu
MIMAT0002807	hsa-miR-491-5p	NM_002160	TNC	circRNA	chr9	117836027	117836048	-	2	0	AGO1-4,AGO2	8mer	ggAGUACCUUCCCAAGGGGUGa	ccUCAAUUACAGUCUCCCCACa
MIMAT0002807	hsa-miR-491-5p	NM_018249	CDK5RAP2	circRNA	chr9	123169266	123169287	-	1	0	AGO1-4	7mer-m8	ggaguaccuucccaAGGGGUGa	acugccccugccucUCCCCACu
MIMAT0002807	hsa-miR-491-5p	NM_015651	PHF19	circRNA	chr9	123618098	123618119	-	8	1	AGO1-4,AGO2	7mer-m8	ggaguaccuucccaAGGGGUGa	gaggucacccugacUCCCCACc
MIMAT0002807	hsa-miR-491-5p	NM_015651	PHF19	circRNA	chr9	123619677	123619698	-	1	0	AGO2	7mer-m8	ggaguaccuucccaAGGGGUGa	cacuuuccugccacUCCCCACu
MIMAT0002807	hsa-miR-491-5p	NM_001127663	GSN	circRNA	chr9	124091199	124091220	+	2	0	AGO1-4,AGO2	7mer-m8	ggaguaccuucccaAGGGGUGa	cugccuaccgcacaUCCCCACg
MIMAT0002807	hsa-miR-491-5p	NM_032552	DAB2IP	circRNA	chr9	124535102	124535123	+	1	0	AGO2	8mer	ggaguacCUUCCCAAGGGGUGa	gggccccGACGUCCUCCCCACa
MIMAT0002807	hsa-miR-491-5p	NM_012197	RABGAP1	circRNA	chr9	125759587	125759608	+	2	0	AGO2	8mer	ggaguaccuucccaAGGGGUGa	gcuggaauccaaaaUCCCCACa
MIMAT0002807	hsa-miR-491-5p	NM_012197	RABGAP1	circRNA	chr9	125866912	125866933	+	11	0	AGO1-4,AGO2	7mer-m8	ggaguaccuucccaAGGGGUGa	aaguggcaacccccUCCCCACc
MIMAT0002807	hsa-miR-491-5p	NM_001171137	STRBP	circRNA	chr9	125922667	125922689	-	2	0	AGO2	8mer	ggAGUACCUU-CCCAAGGGGUGa	auUUGUGCAACAGAGUCCCCACa
MIMAT0002807	hsa-miR-491-5p	NM_018387	STRBP	circRNA	chr9	125922667	125922689	-	2	0	AGO2	8mer	ggAGUACCUU-CCCAAGGGGUGa	auUUGUGCAACAGAGUCCCCACa
MIMAT0002807	hsa-miR-491-5p	hsa_circ_0001886	hsa_circ_002005	circRNA	chr9	125922667	125922689	-	2	0	AGO2	8mer	ggAGUACCUU-CCCAAGGGGUGa	auUUGUGCAACAGAGUCCCCACa
MIMAT0002807	hsa-miR-491-5p	NM_001006618	MAPKAP1	circRNA	chr9	128283887	128283908	-	1	0	AGO1-4	8mer	ggaguaccuuccCAAGGGGUGa	gauuuacugucuGUUCCCCACa
MIMAT0002807	hsa-miR-491-5p	NM_014007	ZBTB43	circRNA	chr9	129598840	129598861	+	1	0	AGO1-4	7mer-m8	ggaguaccuucccaAGGGGUGa	uuaccuuuuuuucaUCCCCACg
MIMAT0002807	hsa-miR-491-5p	NM_001190729	RALGPS1	circRNA	chr9	129957432	129957452	+	1	0	AGO1-4	8mer	ggaguACCUUCCCAAGGGGUGa	guugcUGGCA-GCCUCCCCACa
MIMAT0002807	hsa-miR-491-5p	NM_014636	RALGPS1	circRNA	chr9	129957432	129957452	+	1	0	AGO1-4	8mer	ggaguACCUUCCCAAGGGGUGa	guugcUGGCA-GCCUCCCCACa
MIMAT0002807	hsa-miR-491-5p	NM_022833	FAM129B	circRNA	chr9	130268627	130268648	-	4	0	AGO1-4,AGO2	7mer-m8	ggaguaccuucccAAGGGGUGa	accgagccucgcuUUCCCCACu
MIMAT0002807	hsa-miR-491-5p	NM_022833	FAM129B	circRNA	chr9	130272524	130272551	-	4	0	AGO1-4	7mer-m8	ggAGUACCUUC----C--CAAGGGGUGa	caUCCUGGAGGCCCUGAUGGUCCCCACc
MIMAT0002807	hsa-miR-491-5p	NM_003165	STXBP1	circRNA	chr9	130425514	130425535	+	2	0	AGO1-4	8mer	ggaguaccuucccaAGGGGUGa	caaagcuucuacagUCCCCACa
MIMAT0002807	hsa-miR-491-5p	NM_175039	ST6GALNAC4	circRNA	chr9	130677001	130677022	-	1	0	AGO1-4	8mer	ggaguaccuucccAAGGGGUGa	ccuggaccaccacUUCCCCACa
MIMAT0002807	hsa-miR-491-5p	NM_024112	C9orf16	circRNA	chr9	130926142	130926161	+	3	0	AGO1-4	7mer-m8	ggAGUACCUUCCCAAGGGGUGa	acUCCUGG--GCGCUCCCCACu
MIMAT0002807	hsa-miR-491-5p	NM_001131016	CIZ1	circRNA	chr9	130952997	130953018	-	1	0	AGO2	7mer-m8	ggaguaccuUCCCAAGGGGUGa	agcugcuccAGCAGUCCCCACc
MIMAT0002807	hsa-miR-491-5p	NM_012127	CIZ1	circRNA	chr9	130952997	130953018	-	1	0	AGO2	7mer-m8	ggaguaccuUCCCAAGGGGUGa	agcugcuccAGCAGUCCCCACc
MIMAT0002807	hsa-miR-491-5p	NM_016035	COQ4	circRNA	chr9	131085335	131085356	+	3	0	AGO1-4,AGO2	7mer-m8	ggaguaccuucccaAGGGGUGa	auacucgcaccaccUCCCCACc
MIMAT0002807	hsa-miR-491-5p	NM_001130438	SPTAN1	circRNA	chr9	131395547	131395568	+	5	0	AGO1-4	7mer-m8	ggaguaccuuCCCAAGGGGUGa	caagggccgcGAGCUCCCCACc
MIMAT0002807	hsa-miR-491-5p	NM_018201	TBC1D13	circRNA	chr9	131570324	131570345	+	2	0	AGO1-4	7mer-m8	ggaguaccuuccCAAGGGGUGa	ccgccacgcccaGCUCCCCACc
MIMAT0002807	hsa-miR-491-5p	NM_018201	TBC1D13	circRNA	chr9	131572490	131572509	+	2	0	AGO1-4,AGO2	8mer	ggaGUACCUUCCCAAGGGGUGa	gccCAAGGGAGG--UCCCCACa
MIMAT0002807	hsa-miR-491-5p	NM_001127244	LRRC8A	circRNA	chr9	131671459	131671480	+	5	0	AGO1-4	7mer-m8	ggagUACCUUCCCAAGGGGUGa	caagAUCGAGAAGAUCCCCACc
MIMAT0002807	hsa-miR-491-5p	NM_019594	LRRC8A	circRNA	chr9	131671459	131671480	+	5	0	AGO1-4	7mer-m8	ggagUACCUUCCCAAGGGGUGa	caagAUCGAGAAGAUCCCCACc
MIMAT0002807	hsa-miR-491-5p	NM_001127244	LRRC8A	circRNA	chr9	131679814	131679835	+	2	0	AGO1-4,AGO2	7mer-m8	ggaguaccuucCCAAGGGGUGa	gcccagacuuuGUUUCCCCACc
MIMAT0002807	hsa-miR-491-5p	NM_019594	LRRC8A	circRNA	chr9	131679814	131679835	+	2	0	AGO1-4,AGO2	7mer-m8	ggaguaccuucCCAAGGGGUGa	gcccagacuuuGUUUCCCCACc
MIMAT0002807	hsa-miR-491-5p	NM_001127244	LRRC8A	circRNA	chr9	131680056	131680077	+	5	1	AGO1-4,AGO2	7mer-m8	ggaguaccuucCCAAGGGGUGa	uuagaucacucGGGUCCCCACc
MIMAT0002807	hsa-miR-491-5p	NM_019594	LRRC8A	circRNA	chr9	131680056	131680077	+	5	1	AGO1-4,AGO2	7mer-m8	ggaguaccuucCCAAGGGGUGa	uuagaucacucGGGUCCCCACc
MIMAT0002807	hsa-miR-491-5p	NM_015354	NUP188	circRNA	chr9	131742921	131742942	+	2	0	AGO1-4,AGO2	7mer-m8	ggaGUACCUUCCCAAGGGGUGa	gugUGUGGAAUGUUUCCCCACc
MIMAT0002807	hsa-miR-491-5p	NM_015354	NUP188	circRNA	chr9	131742934	131742955	+	3	0	AGO1-4,AGO2	7mer-m8	ggaguaccuucccaAGGGGUGa	uuccccaccuucucUCCCCACu
MIMAT0002807	hsa-miR-491-5p	NM_015354	NUP188	circRNA	chr9	131745572	131745595	+	2	0	AGO1-4	7mer-m8	ggAGUACCU-UC-CCA-AGGGGUGa	#NAME?
MIMAT0002807	hsa-miR-491-5p	NM_015354	NUP188	circRNA	chr9	131769213	131769234	+	2	0	AGO1-4,AGO2	8mer	ggaguaccuUCCCAAGGGGUGa	uuccuuuccAGCAUUCCCCACa
MIMAT0002807	hsa-miR-491-5p	NM_020145	SH3GLB2	circRNA	chr9	131771581	131771602	-	6	0	AGO1-4,AGO2	7mer-m8	ggaguaccuucccaAGGGGUGa	ccacagagcccgccUCCCCACc
MIMAT0002807	hsa-miR-491-5p	NM_001193397	PPP2R4	circRNA	chr9	131909779	131909800	+	1	0	AGO1-4	7mer-m8	ggaGUACCUUCCCAAGGGGUGa	uccUGUGCCUGCCUUCCCCACc
MIMAT0002807	hsa-miR-491-5p	NM_178001	PPP2R4	circRNA	chr9	131909779	131909800	+	1	0	AGO1-4	7mer-m8	ggaGUACCUUCCCAAGGGGUGa	uccUGUGCCUGCCUUCCCCACc
MIMAT0002807	hsa-miR-491-5p	NM_015033	FNBP1	circRNA	chr9	132658048	132658072	-	3	0	AGO1-4	8mer	ggagUACCUUCCCA---AGGGGUGa	aaaaAUGGAGUUGUUUCUCCCCACa
MIMAT0002807	hsa-miR-491-5p	NM_015033	FNBP1	circRNA	chr9	132658154	132658180	-	3	0	AGO1-4,AGO3	7mer-m8	ggagUACCU-UCCCA----AGGGGUGa	gaagAUGAAGAGGGUUAUGUCCCCACu
MIMAT0002807	hsa-miR-491-5p	NM_000050	ASS1	circRNA	chr9	133370360	133370383	+	3	0	AGO1-4	7mer-m8	ggAGUA-CCUUCCC-AAGGGGUGa	caUCCUCGGCCGGGAGUCCCCACu
MIMAT0002807	hsa-miR-491-5p	NM_003934	FUBP3	circRNA	chr9	133511406	133511425	+	1	0	AGO2	7mer-m8	ggAGUACCUUCCCAAGGGGUGa	ccUCAGGCCA--GCUCCCCACc
MIMAT0002807	hsa-miR-491-5p	NM_001185095	AIF1L	circRNA	chr9	133996229	133996250	+	1	0	AGO1-4	7mer-m8	ggaguaccuuccCAAGGGGUGa	gcugccccagcuGAUCCCCACu
MIMAT0002807	hsa-miR-491-5p	NM_005085	NUP214	circRNA	chr9	134073270	134073291	+	2	0	AGO1-4	8mer	ggaguaccuucccAAGGGGUGa	ccuuccaacaucaUUCCCCACa
MIMAT0002807	hsa-miR-491-5p	NM_033387	FAM78A	circRNA	chr9	134151411	134151432	-	1	0	AGO1-4	7mer-m8	ggaGUACCUUCCCAAGGGGUGa	cucCAUCGACCCCGUCCCCACu
MIMAT0002807	hsa-miR-491-5p	NM_013318	PRRC2B	circRNA	chr9	134272050	134272075	+	3	0	AGO1-4,AGO2	7mer-m8	ggAGUACCUU--CCC--AAGGGGUGa	guUGAUGGAACUGUGACUUCCCCACc
MIMAT0002807	hsa-miR-491-5p	NM_013318	PRRC2B	circRNA	chr9	134285488	134285509	+	2	0	AGO2	7mer-m8	ggaguaccuucccAAGGGGUGa	ugaaaucaucuucUUCCCCACc
MIMAT0002807	hsa-miR-491-5p	NM_013318	PRRC2B	circRNA	chr9	134295580	134295601	+	1	0	AGO1-4	7mer-m8	ggaguaccuucccAAGGGGUGa	caggaaccccacuUUCCCCACu
MIMAT0002807	hsa-miR-491-5p	NM_013318	PRRC2B	circRNA	chr9	134360138	134360159	+	1	0	AGO1-4	7mer-m8	ggaguaccuucccAAGGGGUGa	cuccccaauguccUUCCCCACc
MIMAT0002807	hsa-miR-491-5p	NM_198679	RAPGEF1	circRNA	chr9	134453708	134453729	-	3	0	AGO1-4,AGO2	7mer-m8	ggaguaccuucccaAGGGGUGa	cccucuccccacucUCCCCACg
MIMAT0002807	hsa-miR-491-5p	NM_198679	RAPGEF1	circRNA	chr9	134453717	134453738	-	3	0	AGO1-4,AGO2	7mer-m8	ggaguaccuucccaAGGGGUGa	gcaagcgcacccucUCCCCACu
MIMAT0002807	hsa-miR-491-5p	NM_198679	RAPGEF1	circRNA	chr9	134488739	134488760	-	1	0	AGO2	7mer-m8	ggaguaccuucccaAGGGGUGa	ccucacacugcuucUCCCCACc
MIMAT0002807	hsa-miR-491-5p	NM_198679	RAPGEF1	circRNA	chr9	134494065	134494086	-	1	0	AGO2	7mer-m8	ggaguaccuucccaAGGGGUGa	ucacucaccuguagUCCCCACu
MIMAT0002807	hsa-miR-491-5p	NM_012204	GTF3C4	circRNA	chr9	135554951	135554971	+	1	0	AGO1-4	7mer-m8	ggAGUACCUUCCCAAGGGGUGa	acUGAU-GACUCGCUCCCCACg
MIMAT0002807	hsa-miR-491-5p	NM_012204	GTF3C4	circRNA	chr9	135555112	135555133	+	4	0	AGO1-4,AGO2	7mer-m8	ggaguaccuucccaAGGGGUGa	agaaaacacuagcaUCCCCACc
MIMAT0002807	hsa-miR-491-5p	NM_033161	SURF4	circRNA	chr9	136231818	136231842	-	10	0	AGO1-4,AGO2	7mer-m8	ggaGUAC---CUUCCCAAGGGGUGa	gagCAUGUUUGCGGGCGUCCCCACc
MIMAT0002807	hsa-miR-491-5p	NM_001134398	VAV2	circRNA	chr9	136797034	136797055	-	1	0	AGO2	7mer-m8	ggaguaccuucccaAGGGGUGa	ugucgccuguguuaUCCCCACc
MIMAT0002807	hsa-miR-491-5p	NM_000093	COL5A1	circRNA	chr9	137734858	137734879	+	5	0	AGO1-4,AGO2	7mer-m8	ggagUACCUUCCCAAGGGGUGa	agaaAUAGGAAGUCUCCCCACc
MIMAT0002807	hsa-miR-491-5p	NM_016034	MRPS2	circRNA	chr9	138395724	138395745	+	10	0	AGO1-4,AGO2	8mer	ggaguaccuucccaAGGGGUGa	agccaagaugaacaUCCCCACa
MIMAT0002807	hsa-miR-491-5p	NM_152833	C9orf69	circRNA	chr9	139006968	139006989	-	3	0	AGO1-4,AGO2	8mer	ggaguaccuucccaAGGGGUGa	accucaaauccaugUCCCCACa
MIMAT0002807	hsa-miR-491-5p	NM_001145638	GPSM1	circRNA	chr9	139253166	139253188	+	6	0	AGO2	7mer-m8	ggaguaccuuccCA-AGGGGUGa	cccuccaagccuGUCUCCCCACu
MIMAT0002807	hsa-miR-491-5p	NM_001039707	SDCCAG3	circRNA	chr9	139301970	139301991	-	1	0	AGO2	7mer-m8	ggaguaccuucccaAGGGGUGa	gacuugaccacaacUCCCCACc
MIMAT0002807	hsa-miR-491-5p	NM_006412	AGPAT2	circRNA	chr9	139568342	139568363	-	1	0	AGO2	7mer-m8	ggaguACCUUCCCAAGGGGUGa	ggugcUGGAAGCCAUCCCCACc
MIMAT0002807	hsa-miR-491-5p	NM_001173988	C9orf86	circRNA	chr9	139718047	139718071	+	5	0	AGO1-4,AGO2	8mer	ggAGUACCUUCCCA---AGGGGUGa	guUCGUGGAGGAGUACAUCCCCACa
MIMAT0002807	hsa-miR-491-5p	NM_001173988	C9orf86	circRNA	chr9	139731823	139731845	+	4	0	AGO1-4,AGO2	7mer-m8	ggaGUACC-UUCCCAAGGGGUGa	agcCGUGGCCAUGCGUCCCCACu
MIMAT0002807	hsa-miR-491-5p	NM_018998	FBXW5	circRNA	chr9	139836506	139836527	-	2	1	AGO1-4,AGO2	8mer	ggaguaccuucccaAGGGGUGa	gcugccucaccuacUCCCCACa
MIMAT0002807	hsa-miR-491-5p	NM_015456	COBRA1	circRNA	chr9	140151377	140151400	+	1	0	AGO1	7mer-m8	ggAGUACCU--UCCCAAGGGGUGa	cuUCGGGGACGAGGUUUCCCCACu
MIMAT0002807	hsa-miR-491-5p	NM_017723	C9orf167	circRNA	chr9	140175259	140175280	+	1	0	AGO2	7mer-m8	ggaguaccuucccaAGGGGUGa	cccacaccccacacUCCCCACg
MIMAT0002807	hsa-miR-491-5p	NM_001145527	EHMT1	circRNA	chr9	140671145	140671166	+	1	0	AGO1-4	7mer-m8	ggaguaccuucccaAGGGGUGa	aacgccagcuauugUCCCCACu
MIMAT0002807	hsa-miR-491-5p	NM_024757	EHMT1	circRNA	chr9	140671145	140671166	+	1	0	AGO1-4	7mer-m8	ggaguaccuucccaAGGGGUGa	aacgccagcuauugUCCCCACu
MIMAT0002807	hsa-miR-491-5p	NM_001242339	PFKP	circRNA	chr10	3150135	3150156	+	3	0	AGO1-4	7mer-m8	ggaguacCUUCCCAAGGGGUGa	cggggcaGAAGACGUCCCCACc
MIMAT0002807	hsa-miR-491-5p	NM_001242307	PITRM1	circRNA	chr10	3190401	3190423	-	1	0	AGO1	7mer-m8	ggagUACCUUCCCA-AGGGGUGa	agggAUGAGUGCUUCUCCCCACg
MIMAT0002807	hsa-miR-491-5p	NM_014889	PITRM1	circRNA	chr10	3190401	3190423	-	1	0	AGO1	7mer-m8	ggagUACCUUCCCA-AGGGGUGa	agggAUGAGUGCUUCUCCCCACg
MIMAT0002807	hsa-miR-491-5p	NM_017782	FAM208B	circRNA	chr10	5790331	5790355	+	5	0	AGO1,AGO1-4,AGO2	7mer-m8	ggaGUACCU---UCCCAAGGGGUGa	augCAUGUGCUCAGUGGUCCCCACg
MIMAT0002807	hsa-miR-491-5p	NM_001145443	PFKFB3	circRNA	chr10	6255683	6255707	+	11	0	AGO1-4,AGO2	8mer	ggAGU--ACCU-UCCCAAGGGGUGa	ccUCAACUGGAUUGGCGUCCCCACa
MIMAT0002807	hsa-miR-491-5p	NM_004566	PFKFB3	circRNA	chr10	6255683	6255707	+	11	0	AGO1-4,AGO2	8mer	ggAGU--ACCU-UCCCAAGGGGUGa	ccUCAACUGGAUUGGCGUCCCCACa
MIMAT0002807	hsa-miR-491-5p	NM_001018039	SFMBT2	circRNA	chr10	7412257	7412278	-	1	0	AGO2	8mer	ggaguaccuuccCAAGGGGUGa	ggagcaagugcuGCUCCCCACa
MIMAT0002807	hsa-miR-491-5p	NM_001029880	SFMBT2	circRNA	chr10	7412257	7412278	-	1	0	AGO2	8mer	ggaguaccuuccCAAGGGGUGa	ggagcaagugcuGCUCCCCACa
MIMAT0002807	hsa-miR-491-5p	hsa_circ_0000212	hsa_circ_000525	circRNA	chr10	7412257	7412278	-	1	0	AGO2	8mer	ggaguaccuuccCAAGGGGUGa	ggagcaagugcuGCUCCCCACa
MIMAT0002807	hsa-miR-491-5p	NM_014688	USP6NL	circRNA	chr10	11633074	11633095	-	1	0	AGO2	8mer	ggaguaccuucccaAGGGGUGa	cuucuuuaacccccUCCCCACa
MIMAT0002807	hsa-miR-491-5p	NM_018027	FRMD4A	circRNA	chr10	13701339	13701360	-	1	0	AGO1-4	7mer-m8	ggaguaccuuCCCAAGGGGUGa	cugcggguccGGAGUCCCCACu
MIMAT0002807	hsa-miR-491-5p	NM_019590	KIAA1217	circRNA	chr10	24813584	24813605	+	2	0	AGO1,AGO1-4	8mer	ggaguaccuucccaAGGGGUGa	cgcaggcuccgcagUCCCCACa
MIMAT0002807	hsa-miR-491-5p	NM_021738	SVIL	circRNA	chr10	29776142	29776163	-	1	0	AGO1-4	7mer-m8	ggaguaccuucccaAGGGGUGa	uuccuccugcucucUCCCCACu
MIMAT0002807	hsa-miR-491-5p	NM_021738	SVIL	circRNA	chr10	29937834	29937855	-	1	0	AGO1-4	7mer-m8	ggaguaccuucccaAGGGGUGa	ggcugaagcaauccUCCCCACu
MIMAT0002807	hsa-miR-491-5p	NM_021738	SVIL	circRNA	chr10	29939234	29939255	-	1	0	AGO1-4	7mer-m8	ggaguaccuucccAAGGGGUGa	aucaguacauucuUUCCCCACg
MIMAT0002807	hsa-miR-491-5p	NM_021738	SVIL	circRNA	chr10	29962675	29962698	-	1	0	AGO1-4	8mer	ggAGUACCUUCCCA--AGGGGUGa	caUCUCGAAAUUGUAAUCCCCACa
MIMAT0002807	hsa-miR-491-5p	NM_021738	SVIL	circRNA	chr10	30017981	30018002	-	1	0	AGO1-4	8mer	ggaGUACCUUCCCAAGGGGUGa	agcCAUAGUACCACUCCCCACa
MIMAT0002807	hsa-miR-491-5p	NM_001128128	ZEB1	circRNA	chr10	31607880	31607901	+	1	0	AGO2	7mer-m8	ggaguaccuucccaAGGGGUGa	cauccgccucccucUCCCCACc
MIMAT0002807	hsa-miR-491-5p	NM_145012	CCNY	circRNA	chr10	35858282	35858303	+	1	0	AGO2	7mer-m8	ggaguaccuucccaAGGGGUGa	aucccagcucgcucUCCCCACu
MIMAT0002807	hsa-miR-491-5p	NM_145011	ZNF25	circRNA	chr10	38239466	38239487	-	1	0	AGO1	7mer-m8	ggaguaccuucccAAGGGGUGa	uacccaacauucaUUCCCCACc
MIMAT0002807	hsa-miR-491-5p	NM_014753	BMS1	circRNA	chr10	43292396	43292420	+	3	0	AGO1-4,AGO2	7mer-m8	ggAGUACCUUC--CCA-AGGGGUGa	gaUGAAGAAAGCAGCUCUCCCCACu
MIMAT0002807	hsa-miR-491-5p	NM_007021	C10orf10	circRNA	chr10	45472160	45472181	-	4	0	AGO1-4,AGO2	7mer-m8	ggaguaccuucccaAGGGGUGa	acucagugcuaccaUCCCCACc
MIMAT0002807	hsa-miR-491-5p	NM_015262	FAM21C	circRNA	chr10	46951575	46951596	+	1	0	AGO1-4	7mer-m8	ggaguaccuucccaAGGGGUGa	accuguuaaucacgUCCCCACg
MIMAT0002807	hsa-miR-491-5p	NR_027632	FAM35B	circRNA	chr10	46951575	46951596	+	1	0	AGO1-4	7mer-m8	ggaguaccuucccaAGGGGUGa	accuguuaaucacgUCCCCACg
MIMAT0002807	hsa-miR-491-5p	NM_015262	FAM21C	circRNA	chr10	46951617	46951641	+	1	0	AGO1-4	8mer	ggaguacCUUCCCA---AGGGGUGa	gccgucuGCAGGCUCCGUCCCCACa
MIMAT0002807	hsa-miR-491-5p	NR_027632	FAM35B	circRNA	chr10	46951617	46951641	+	1	0	AGO1-4	8mer	ggaguacCUUCCCA---AGGGGUGa	gccgucuGCAGGCUCCGUCCCCACa
MIMAT0002807	hsa-miR-491-5p	TCONS_00018502	TCONS_00018502	circRNA	chr10	48413710	48413731	-	1	0	AGO1-4	8mer	ggaguaccuuccCAAGGGGUGa	ggugcaucucaaGUUCCCCACa
MIMAT0002807	hsa-miR-491-5p	TCONS_l2_00004179	TCONS_l2_00004179	circRNA	chr10	48413710	48413731	-	1	0	AGO1-4	8mer	ggaguaccuuccCAAGGGGUGa	ggugcaucucaaGUUCCCCACa
MIMAT0002807	hsa-miR-491-5p	TCONS_l2_00003048	TCONS_l2_00003048	circRNA	chr10	48417617	48417639	+	1	0	AGO1-4	8mer	ggaGUAC-CUUCCCAAGGGGUGa	cagCCUGUGGGGAGCUCCCCACa
MIMAT0002807	hsa-miR-491-5p	TCONS_l2_00003976	TCONS_l2_00003976	circRNA	chr10	48417617	48417639	+	1	0	AGO1-4	8mer	ggaGUAC-CUUCCCAAGGGGUGa	cagCCUGUGGGGAGCUCCCCACa
MIMAT0002807	hsa-miR-491-5p	NR_003611	BMS1P5	circRNA	chr10	49239213	49239234	-	1	0	AGO1-4	7mer-m8	ggaguaccuucccAAGGGGUGa	caccccuuagucuUUCCCCACc
MIMAT0002807	hsa-miR-491-5p	NM_147156	SGMS1	circRNA	chr10	52103596	52103617	-	4	0	AGO1-4,AGO2	7mer-m8	ggAGUACCUUCCCAAGGGGUGa	caUUGGCGUAGACAUCCCCACc
MIMAT0002807	hsa-miR-491-5p	NM_194298	SLC16A9	circRNA	chr10	61412312	61412333	-	1	0	AGO1-4	8mer	ggaguaccuucccaAGGGGUGa	uuuucuauuucuccUCCCCACa
MIMAT0002807	hsa-miR-491-5p	NM_194298	SLC16A9	circRNA	chr10	61443958	61443979	-	1	0	AGO1-4	7mer-m8	ggAGUACCUUCCCAAGGGGUGa	uuUUGUGUUACGGAUCCCCACu
MIMAT0002807	hsa-miR-491-5p	NM_030625	TET1	circRNA	chr10	70442674	70442695	+	1	0	AGO2	8mer	ggaguaccuucccaAGGGGUGa	gacuucugugcucaUCCCCACa
MIMAT0002807	hsa-miR-491-5p	NM_030625	TET1	circRNA	chr10	70450875	70450896	+	1	0	AGO1-4	7mer-m8	ggaguaccuucccaAGGGGUGa	cgaaguggcuccucUCCCCACc
MIMAT0002807	hsa-miR-491-5p	NM_004096	EIF4EBP2	circRNA	chr10	72164193	72164214	+	21	0	AGO1,AGO1-4,AGO2	7mer-m8	ggaguaccuucccaAGGGGUGa	ccagagccgcgccaUCCCCACc
MIMAT0002807	hsa-miR-491-5p	NM_014431	KIAA1274	circRNA	chr10	72326894	72326914	+	2	0	AGO1-4,AGO2	7mer-m8	ggaGU-ACCUUCCCAAGGGGUGa	ggcCACUGGUA--GCUCCCCACu
MIMAT0002807	hsa-miR-491-5p	NM_000281	PCBD1	circRNA	chr10	72643543	72643563	-	4	0	AGO1-4,AGO2	7mer-m8	ggaGUACCUUCCCAAGGGGUGa	ggaUGUGCCAGUG-UCCCCACc
MIMAT0002807	hsa-miR-491-5p	NM_004273	CHST3	circRNA	chr10	73770524	73770545	+	4	0	AGO1-4,AGO2	7mer-m8	ggaguaccuucccaAGGGGUGa	guucuuccccagccUCCCCACu
MIMAT0002807	hsa-miR-491-5p	NM_001002762	DNAJB12	circRNA	chr10	74093417	74093438	-	1	0	AGO1-4	7mer-m8	ggaguaccuucccAAGGGGUGa	ucuaccuaaccauUUCCCCACc
MIMAT0002807	hsa-miR-491-5p	NM_152586	USP54	circRNA	chr10	75257729	75257754	-	2	0	AGO1,AGO2	7mer-m8	ggAGUACCUUCCCA----AGGGGUGa	auUCCUGGAUGCUUUAUGUCCCCACc
MIMAT0002807	hsa-miR-491-5p	NM_207012	AP3M1	circRNA	chr10	75893891	75893912	-	1	0	AGO1-4	7mer-m8	ggAGUACCUUCCCAAGGGGUGa	ugUUGGGGACACACUCCCCACc
MIMAT0002807	hsa-miR-491-5p	NM_001123	ADK	circRNA	chr10	75994056	75994077	+	1	0	AGO1-4	8mer	ggaguaccuucccaAGGGGUGa	gugaucuaauuuaaUCCCCACa
MIMAT0002807	hsa-miR-491-5p	hsa_circ_0000249	hsa_circ_001838	circRNA	chr10	76243195	76243216	+	1	0	AGO1-4	7mer-m8	ggaguaccuucccAAGGGGUGa	ccuuagcagcauuUUCCCCACu
MIMAT0002807	hsa-miR-491-5p	NM_004747	DLG5	circRNA	chr10	79616623	79616647	-	1	0	AGO1-4	7mer-m8	ggaguaCCUUCC-C--AAGGGGUGa	cuaccgGGAAGGCGCCGUCCCCACc
MIMAT0002807	hsa-miR-491-5p	NM_007055	POLR3A	circRNA	chr10	79735096	79735117	-	1	0	AGO2	7mer-m8	ggaguACCUUCCCAAGGGGUGa	ccuacUGUUUGUGCUCCCCACu
MIMAT0002807	hsa-miR-491-5p	NM_007055	POLR3A	circRNA	chr10	79737130	79737147	-	4	0	AGO1,AGO2	7mer-m8	ggAGUACCUUCCCAAGGGGUGa	ggUCCUG--AGG--UCCCCACc
MIMAT0002807	hsa-miR-491-5p	NM_001142285	RPS24	circRNA	chr10	79814924	79814945	+	1	0	AGO2	7mer-m8	ggaguaccUUCCCAAGGGGUGa	aaaugccaAAGACCUCCCCACg
MIMAT0002807	hsa-miR-491-5p	NM_020338	ZMIZ1	circRNA	chr10	81056254	81056275	+	6	0	AGO1,AGO1-4,AGO2	7mer-m8	ggaguaccuuccCAAGGGGUGa	accaaacagccaGUUCCCCACc
MIMAT0002807	hsa-miR-491-5p	NM_005271	GLUD1	circRNA	chr10	88837370	88837391	-	1	0	AGO2	7mer-m8	ggaguacCUUCCCAAGGGGUGa	caaagcuGUGGGCAUCCCCACu
MIMAT0002807	hsa-miR-491-5p	NM_005271	GLUD1	circRNA	chr10	88851660	88851681	-	1	0	AGO2	7mer-m8	ggaguaccuucccaAGGGGUGa	guucuucuuaccucUCCCCACu
MIMAT0002807	hsa-miR-491-5p	NM_016195	KIF20B	circRNA	chr10	91534555	91534576	+	2	0	AGO1-4	7mer-m8	ggaguaccuucccaAGGGGUGa	guacccauuaaccaUCCCCACc
MIMAT0002807	hsa-miR-491-5p	NM_000772	CYP2C18	circRNA	chr10	96484212	96484233	+	1	0	AGO1-4	7mer-m8	ggaGUACCUUCCCAAGGGGUGa	auaCAUUGACCUCCUCCCCACc
MIMAT0002807	hsa-miR-491-5p	NM_032440	LCOR	circRNA	chr10	98715497	98715515	+	1	0	AGO2	8mer	ggAGUACCUUCCCAAGGGGUGa	auUUAUGGGA---UUCCCCACa
MIMAT0002807	hsa-miR-491-5p	NM_032900	ARHGAP19	circRNA	chr10	99024636	99024657	-	1	0	AGO2	7mer-m8	ggaguaccuucCCAAGGGGUGa	gagugauauuuGGGUCCCCACu
MIMAT0002807	hsa-miR-491-5p	NM_015179	RRP12	circRNA	chr10	99141210	99141235	-	2	0	AGO1-4,AGO2	8mer	ggAGUACCUU---C-CCAAGGGGUGa	ccUGAAGGAAUGCGUGGCUCCCCACa
MIMAT0002807	hsa-miR-491-5p	NM_015179	RRP12	circRNA	chr10	99141509	99141530	-	2	0	AGO1-4	8mer	ggaguaccuucccAAGGGGUGa	ugaccugccuccuUUCCCCACa
MIMAT0002807	hsa-miR-491-5p	NM_032709	PYROXD2	circRNA	chr10	100154966	100154985	-	7	0	AGO1-4	8mer	ggaGUACCUUCCCAAGGGGUGa	agcCAUGACAAG--UCCCCACa
MIMAT0002807	hsa-miR-491-5p	NM_017902	HIF1AN	circRNA	chr10	102308345	102308366	+	3	0	AGO1,AGO1-4,AGO2	7mer-m8	ggaguaccuuCCCAAGGGGUGa	agaugcucuuGGACUCCCCACu
MIMAT0002807	hsa-miR-491-5p	NM_018121	FAM178A	circRNA	chr10	102706823	102706844	+	1	0	AGO1	8mer	ggaguaccuUCCCAAGGGGUGa	gaacucuccAGUCAUCCCCACa
MIMAT0002807	hsa-miR-491-5p	NM_001203244	SEMA4G	circRNA	chr10	102744602	102744624	+	1	0	AGO2	7mer-m8	ggAGUACCU-UCCCAAGGGGUGa	ccUUGUGAAUCAGCCUCCCCACu
MIMAT0002807	hsa-miR-491-5p	NM_001163812	C10orf2	circRNA	chr10	102753889	102753910	+	1	0	AGO2	7mer-m8	ggaguaccuuccCAAGGGGUGa	ccaagcuccucuGCUCCCCACu
MIMAT0002807	hsa-miR-491-5p	NM_015062	PPRC1	circRNA	chr10	103906437	103906458	+	3	0	AGO1,AGO1-4	7mer-m8	ggaguaccuucccaAGGGGUGa	ccuccagcuaccccUCCCCACc
MIMAT0002807	hsa-miR-491-5p	NM_014976	PDCD11	circRNA	chr10	105178262	105178283	+	1	0	AGO2	8mer	ggaguaccuucccaAGGGGUGa	cauccgugcuuuccUCCCCACa
MIMAT0002807	hsa-miR-491-5p	NM_007373	SHOC2	circRNA	chr10	112772713	112772734	+	47	0	AGO1,AGO1-4,AGO2,AGO3	8mer	ggaguaccuucccAAGGGGUGa	acuaaaugcacuuUUCCCCACa
MIMAT0002807	hsa-miR-491-5p	NM_145206	VTI1A	circRNA	chr10	114578437	114578458	+	1	0	AGO2	7mer-m8	ggaguaccuucccaAGGGGUGa	ucuuucauuauuagUCCCCACc
MIMAT0002807	hsa-miR-491-5p	NM_153810	C10orf46	circRNA	chr10	120441360	120441381	-	1	2	AGO1-4	7mer-m8	ggaguaccuucccaAGGGGUGa	aucauuccucucugUCCCCACu
MIMAT0002807	hsa-miR-491-5p	NM_001033925	TIAL1	circRNA	chr10	121356037	121356058	-	3	0	AGO1-4,AGO2	7mer-m8	ggaguaccuucccaAGGGGUGa	cccccuccccuuccUCCCCACc
MIMAT0002807	hsa-miR-491-5p	NM_014937	INPP5F	circRNA	chr10	121588429	121588450	+	2	0	AGO1-4	8mer	ggaguaccuucccaAGGGGUGa	ggcugccccuguaaUCCCCACa
MIMAT0002807	hsa-miR-491-5p	NM_024834	MCMBP	circRNA	chr10	121598155	121598176	-	6	0	AGO1-4,AGO2	8mer	ggaguaccuucccAAGGGGUGa	cauuugaaauucaUUCCCCACa
MIMAT0002807	hsa-miR-491-5p	NM_017580	ZRANB1	circRNA	chr10	126637226	126637247	+	1	0	AGO1-4	8mer	ggaguaccuucccaAGGGGUGa	cuguccauuaucccUCCCCACa
MIMAT0002807	hsa-miR-491-5p	NM_001083914	CTBP2	circRNA	chr10	126798338	126798359	-	1	0	AGO1-4	7mer-m8	ggaguaccuucccaAGGGGUGa	gguacccaggacccUCCCCACc
MIMAT0002807	hsa-miR-491-5p	NM_001083914	CTBP2	circRNA	chr10	126817804	126817826	-	2	0	AGO1-4,AGO2	7mer-m8	ggaGUACCUUCCCA-AGGGGUGa	ggcCCUGCCAGGCUGUCCCCACc
MIMAT0002807	hsa-miR-491-5p	NM_002417	MKI67	circRNA	chr10	129908655	129908676	-	1	0	AGO1-4	7mer-m8	ggaguaccuuccCAAGGGGUGa	agaagaaccucuGCUCCCCACc
MIMAT0002807	hsa-miR-491-5p	NM_002417	MKI67	circRNA	chr10	129923874	129923893	-	4	0	AGO1,AGO1-4,AGO2	7mer-m8	ggagUACCUUCCCAAGGGGUGa	cgggGUCGACGG--UCCCCACu
MIMAT0002807	hsa-miR-491-5p	NM_006435	IFITM2	circRNA	chr11	309298	309319	+	13	0	AGO1-4,AGO2	8mer	ggaguaccuucccaAGGGGUGa	cauuccucgcccugUCCCCACa
MIMAT0002807	hsa-miR-491-5p	NM_178537	B4GALNT4	circRNA	chr11	381979	382000	+	2	0	AGO2	7mer-m8	ggaGUACCUUCCCAAGGGGUGa	gggCCUGGCCUUGGUCCCCACu
MIMAT0002807	hsa-miR-491-5p	NM_004357	CD151	circRNA	chr11	838651	838672	+	7	0	AGO1-4	7mer-m8	ggaguaccuucccAAGGGGUGa	cgccccugcugucUUCCCCACc
MIMAT0002807	hsa-miR-491-5p	NM_001242837	AP2A2	circRNA	chr11	993790	993811	+	1	0	AGO1-4	7mer-m8	ggaGUAC-CUUCCCAAGGGGUGa	ccaCCUGUGCAGCG-UCCCCACc
MIMAT0002807	hsa-miR-491-5p	NM_012305	AP2A2	circRNA	chr11	993790	993811	+	1	0	AGO1-4	7mer-m8	ggaGUAC-CUUCCCAAGGGGUGa	ccaCCUGUGCAGCG-UCCCCACc
MIMAT0002807	hsa-miR-491-5p	NM_053005	MOB2	circRNA	chr11	1492532	1492553	-	1	0	AGO2	8mer	ggaguaCCUUCCCAAGGGGUGa	ggaugaGGACGUGUUCCCCACa
MIMAT0002807	hsa-miR-491-5p	hsa_circ_0000272	hsa_circ_000108	circRNA	chr11	1492532	1492553	-	1	0	AGO2	8mer	ggaguaCCUUCCCAAGGGGUGa	ggaugaGGACGUGUUCCCCACa
MIMAT0002807	hsa-miR-491-5p	NM_001242932	LSP1	circRNA	chr11	1913203	1913224	+	1	0	AGO1-4	7mer-m8	ggaguaccuucccaAGGGGUGa	caccgcccccgcccUCCCCACc
MIMAT0002807	hsa-miR-491-5p	TCONS_00063837_H19	TCONS_00063837_H19	circRNA	chr11	2016458	2016479	-	10	0	AGO1-4,AGO2	7mer-m8	ggaguaccuucccaAGGGGUGa	ucgcucugugccccUCCCCACc
MIMAT0002807	hsa-miR-491-5p	TCONS_00063837_H19	TCONS_00063837_H19	circRNA	chr11	2016837	2016857	-	2	0	AGO1-4,AGO2	7mer-m8	ggagUACCUUCCCAAGGGGUGa	cgggAU-GACGCCGUCCCCACc
MIMAT0002807	hsa-miR-491-5p	NR_003512	INS-IGF2	circRNA	chr11	2152333	2152355	-	1	0	AGO1-4	7mer-m8	ggAGUACCUUCCCA-AGGGGUGa	ccUCCUUGGCGCCUGUCCCCACg
MIMAT0002807	hsa-miR-491-5p	NR_003512	INS-IGF2	circRNA	chr11	2153715	2153740	-	3	0	AGO2	7mer-m8	ggAGUACCUU---CC-CAAGGGGUGa	aaUAAAGGAAUUUGGCACUCCCCACc
MIMAT0002807	hsa-miR-491-5p	NR_003512	INS-IGF2	circRNA	chr11	2153932	2153953	-	2	0	AGO1-4,AGO2	8mer	ggaguaccuucccaAGGGGUGa	auuauccccaauuaUCCCCACa
MIMAT0002807	hsa-miR-491-5p	NM_016320	NUP98	circRNA	chr11	3712682	3712703	-	1	0	AGO1-4	7mer-m8	ggaguaccuuccCAAGGGGUGa	acagauaugccuGCUCCCCACu
MIMAT0002807	hsa-miR-491-5p	NM_005387	NUP98	circRNA	chr11	3818638	3818659	-	1	0	AGO1-4	7mer-m8	ggaguaccuucccAAGGGGUGa	cugacacuuccccUUCCCCACc
MIMAT0002807	hsa-miR-491-5p	NM_016320	NUP98	circRNA	chr11	3818638	3818659	-	1	0	AGO1-4	7mer-m8	ggaguaccuucccAAGGGGUGa	cugacacuuccccUUCCCCACc
MIMAT0002807	hsa-miR-491-5p	NM_001665	RHOG	circRNA	chr11	3849264	3849288	-	3	0	AGO1,AGO1-4,AGO2	7mer-m8	ggaguaccUUCCCA---AGGGGUGa	uuuccccaAAGAGUACAUCCCCACc
MIMAT0002807	hsa-miR-491-5p	NM_003156	STIM1	circRNA	chr11	4112888	4112909	+	1	0	AGO2	7mer-m8	ggaguaccUUCCCAAGGGGUGa	cgaaacacACGCAUUCCCCACc
MIMAT0002807	hsa-miR-491-5p	NM_006284	TAF10	circRNA	chr11	6632110	6632131	-	6	2	AGO1,AGO1-4,AGO2	8mer	ggaguaccuucccaAGGGGUGa	uaucuguccccaugUCCCCACa
MIMAT0002807	hsa-miR-491-5p	NM_000391	TPP1	circRNA	chr11	6634819	6634840	-	1	0	AGO1-4	7mer-m8	ggaguaccuucccaAGGGGUGa	cuuauccacuuauaUCCCCACu
MIMAT0002807	hsa-miR-491-5p	NM_000391	TPP1	circRNA	chr11	6638576	6638595	-	2	0	AGO1-4,AGO2	8mer	ggaguACCUUCCCAAGGGGUGa	cauguUGUAAGG--UCCCCACa
MIMAT0002807	hsa-miR-491-5p	NM_000391	TPP1	circRNA	chr11	6638956	6638978	-	2	0	AGO1-4	7mer-m8	ggAGUACC-UUCC-CAAGGGGUGa	gaUC-UGGUGAGGCCAUCCCCACu
MIMAT0002807	hsa-miR-491-5p	NM_005418	ST5	circRNA	chr11	8752718	8752739	-	1	0	AGO1-4	7mer-m8	ggaguaccuucccaAGGGGUGa	caccuccaguucucUCCCCACc
MIMAT0002807	hsa-miR-491-5p	NM_001098579	MRVI1	circRNA	chr11	10653592	10653608	-	1	0	AGO1-4	8mer	ggaguaccuucccaAGGGGUGa	#NAME?
MIMAT0002807	hsa-miR-491-5p	NM_001172705	EIF4G2	circRNA	chr11	10828894	10828915	-	12	0	AGO1-4,AGO2	7mer-m8	ggaguaccuucccaAGGGGUGa	ccuguccccuccccUCCCCACc
MIMAT0002807	hsa-miR-491-5p	NM_001418	EIF4G2	circRNA	chr11	10828894	10828915	-	12	0	AGO1-4,AGO2	7mer-m8	ggaguaccuucccaAGGGGUGa	ccuguccccuccccUCCCCACc
MIMAT0002807	hsa-miR-491-5p	NM_021961	TEAD1	circRNA	chr11	12961887	12961908	+	1	0	AGO1-4	7mer-m8	ggaguaccuucccAAGGGGUGa	ccacuagcaccuaUUCCCCACc
MIMAT0002807	hsa-miR-491-5p	NM_001017	RPS13	circRNA	chr11	17098976	17098996	-	6	0	AGO1,AGO1-4,AGO2	7mer-m8	ggAGUACCUUCCCAAGGGGUGa	uaUCGACGCAGCG-UCCCCACu
MIMAT0002807	hsa-miR-491-5p	NM_001142307	GTF2H1	circRNA	chr11	18362820	18362840	+	1	0	AGO1-4	8mer	ggaGUACCUUCCCAAGGGGUGa	augCA-GAAAAUGUUCCCCACa
MIMAT0002807	hsa-miR-491-5p	NM_017583	TRIM44	circRNA	chr11	35828956	35828976	+	1	0	AGO2	7mer-m8	ggAGUACCUUCCCAAGGGGUGa	cuUCCU-GUGGCACUCCCCACc
MIMAT0002807	hsa-miR-491-5p	NM_174902	LDLRAD3	circRNA	chr11	36248926	36248950	+	1	0	AGO1-4	7mer-m8	ggaGUA-CCUUC--CCAAGGGGUGa	augCGUCGGAAGUAGGCUCCCCACc
MIMAT0002807	hsa-miR-491-5p	NM_052854	CREB3L1	circRNA	chr11	46332703	46332724	+	1	0	AGO1-4	7mer-m8	ggaguaccuucccaAGGGGUGa	cggccaucuccaccUCCCCACu
MIMAT0002807	hsa-miR-491-5p	NM_001105540	DGKZ	circRNA	chr11	46398718	46398739	+	2	3	AGO1-4	7mer-m8	ggaguaccuucccaAGGGGUGa	ccccacuuccccucUCCCCACc
MIMAT0002807	hsa-miR-491-5p	NM_001199266	DGKZ	circRNA	chr11	46398718	46398739	+	2	3	AGO1-4	7mer-m8	ggaguaccuucccaAGGGGUGa	ccccacuuccccucUCCCCACc
MIMAT0002807	hsa-miR-491-5p	NM_017749	AMBRA1	circRNA	chr11	46614854	46614877	-	1	0	AGO1-4	8mer	ggAGUACCUUCCC--AAGGGGUGa	ugUCUGGGACGUGACUUCCCCACa
MIMAT0002807	hsa-miR-491-5p	NM_001128225	SLC39A13	circRNA	chr11	47437396	47437417	+	2	0	AGO1-4	7mer-m8	ggaguaccuucccAAGGGGUGa	uccuggcccuuccUUCCCCACu
MIMAT0002807	hsa-miR-491-5p	NM_001172640	CELF1	circRNA	chr11	47490808	47490829	-	2	0	AGO1-4	7mer-m8	ggaguaccUUCCCAAGGGGUGa	ucccugaaAAAUUUUCCCCACc
MIMAT0002807	hsa-miR-491-5p	NM_001025596	CELF1	circRNA	chr11	47496949	47496970	-	34	0	AGO1,AGO1-4,AGO2,AGO3,AGO4	7mer-m8	ggaguaccuuCCCAAGGGGUGa	ugcugcugcuGCGCUCCCCACu
MIMAT0002807	hsa-miR-491-5p	NM_001172639	CELF1	circRNA	chr11	47496949	47496970	-	34	0	AGO1,AGO1-4,AGO2,AGO3,AGO4	7mer-m8	ggaguaccuuCCCAAGGGGUGa	ugcugcugcuGCGCUCCCCACu
MIMAT0002807	hsa-miR-491-5p	NM_001172640	CELF1	circRNA	chr11	47496949	47496970	-	34	0	AGO1,AGO1-4,AGO2,AGO3,AGO4	7mer-m8	ggaguaccuuCCCAAGGGGUGa	ugcugcugcuGCGCUCCCCACu
MIMAT0002807	hsa-miR-491-5p	NM_198700	CELF1	circRNA	chr11	47496949	47496970	-	34	0	AGO1,AGO1-4,AGO2,AGO3,AGO4	7mer-m8	ggaguaccuuCCCAAGGGGUGa	ugcugcugcuGCGCUCCCCACu
MIMAT0002807	hsa-miR-491-5p	NM_175732	PTPMT1	circRNA	chr11	47591296	47591317	+	2	0	AGO1-4	7mer-m8	ggaGUACCUUCCCAAGGGGUGa	agaCAUGACUGGGAUCCCCACc
MIMAT0002807	hsa-miR-491-5p	NM_033396	TNKS1BP1	circRNA	chr11	57089313	57089334	-	4	0	AGO1-4	7mer-m8	ggAGUACCUUCCCAAGGGGUGa	gcUCAGCCAUGGCUUCCCCACu
MIMAT0002807	hsa-miR-491-5p	NM_003146	SSRP1	circRNA	chr11	57093826	57093847	-	5	1	AGO1-4,AGO2	7mer-m8	ggaguaccuucccaAGGGGUGa	ucacaccccccgacUCCCCACc
MIMAT0002807	hsa-miR-491-5p	NM_014096	SLC43A3	circRNA	chr11	57193064	57193082	-	1	0	AGO2	7mer-m8	ggAGUACCUUCCCAAGGGGUGa	cuUCAUGACA---UUCCCCACu
MIMAT0002807	hsa-miR-491-5p	NR_026593	TMX2	circRNA	chr11	57508377	57508398	+	5	0	AGO1-4,AGO2	8mer	ggaguaccuucccaAGGGGUGa	acccucugacauacUCCCCACa
MIMAT0002807	hsa-miR-491-5p	NM_001085458	CTNND1	circRNA	chr11	57584685	57584707	+	5	0	AGO1-4,AGO2	7mer-m8	ggAGUACCUU--CCCAAGGGGUGa	agUC-UGAAACUGGCUUCCCCACu
MIMAT0002807	hsa-miR-491-5p	NM_017966	VPS37C	circRNA	chr11	60898449	60898470	-	2	0	AGO1-4	7mer-m8	ggaguaccuuCCCAAGGGGUGa	ucucuccucuGGGGUCCCCACu
MIMAT0002807	hsa-miR-491-5p	NM_017966	VPS37C	circRNA	chr11	60899572	60899593	-	1	0	AGO1-4	8mer	ggaguaccuuccCAAGGGGUGa	cggguuacuccuGGUCCCCACa
MIMAT0002807	hsa-miR-491-5p	NM_001923	DDB1	circRNA	chr11	61067032	61067054	-	6	0	AGO1,AGO1-4,AGO2	7mer-m8	ggagUACCUUC-CCAAGGGGUGa	ggagAUGGUGGAUGAUCCCCACg
MIMAT0002807	hsa-miR-491-5p	NM_017841	SDHAF2	circRNA	chr11	61213970	61213994	+	1	0	AGO2	7mer-m8	ggAGUACCUUC-CC--AAGGGGUGa	cuUUGUUGAAGUGGAACUCCCCACu
MIMAT0002807	hsa-miR-491-5p	NM_004265	FADS2	circRNA	chr11	61632624	61632636	+	3	0	AGO1-4,AGO2	7mer-m8	ggaguaccuucccAAGGGGUGa	#NAME?
MIMAT0002807	hsa-miR-491-5p	NM_004265	FADS2	circRNA	chr11	61634768	61634787	+	9	0	AGO1-4,AGO2	7mer-m8	ggAGUACCUUCCCAAGGGGUGa	uaUCAUGUUA--CUUCCCCACc
MIMAT0002807	hsa-miR-491-5p	NM_001404	EEF1G	circRNA	chr11	62339039	62339058	-	11	0	AGO1,AGO1-4,AGO2	7mer-m8	ggaGUACCUUCCCAAGGGGUGa	guaCCUGG--GUGUUCCCCACc
MIMAT0002807	hsa-miR-491-5p	NM_022830	TUT1	circRNA	chr11	62346447	62346468	-	2	0	AGO2	7mer-m8	ggaguaccuuCCCAAGGGGUGa	acucggcccuGGCUUCCCCACu
MIMAT0002807	hsa-miR-491-5p	NM_030628	INTS5	circRNA	chr11	62417047	62417068	-	1	0	AGO1-4	7mer-m8	ggaguaccuuCCCAAGGGGUGa	cagcaccagcGUGUUCCCCACg
MIMAT0002807	hsa-miR-491-5p	NM_001081491	NXF1	circRNA	chr11	62567703	62567724	-	3	0	AGO1-4,AGO2	7mer-m8	ggaguaccuuCCCAAGGGGUGa	agaggaucgcGUGCUCCCCACu
MIMAT0002807	hsa-miR-491-5p	NM_138471	C11orf84	circRNA	chr11	63594910	63594931	+	5	0	AGO1-4,AGO2	7mer-m8	ggaguaccuuccCAAGGGGUGa	cacccucccccuGCUCCCCACc
MIMAT0002807	hsa-miR-491-5p	NM_138471	C11orf84	circRNA	chr11	63595002	63595023	+	4	0	AGO1-4,AGO2	7mer-m8	ggaguaccuucccaAGGGGUGa	ggggacaccucuccUCCCCACu
MIMAT0002807	hsa-miR-491-5p	NM_001039469	MARK2	circRNA	chr11	63670554	63670579	+	1	0	AGO1	7mer-m8	ggagUACCUUC--CC--AAGGGGUGa	acaaAUCGAAGCAGGAAUUCCCCACu
MIMAT0002807	hsa-miR-491-5p	NM_017490	MARK2	circRNA	chr11	63670554	63670579	+	1	0	AGO1	7mer-m8	ggagUACCUUC--CC--AAGGGGUGa	acaaAUCGAAGCAGGAAUUCCCCACu
MIMAT0002807	hsa-miR-491-5p	NM_006819	STIP1	circRNA	chr11	63960626	63960649	+	14	0	AGO1,AGO1-4,AGO2,AGO3	8mer	ggaguaccUUC--CCAAGGGGUGa	aagcuauuAAGCUGGAUCCCCACa
MIMAT0002807	hsa-miR-491-5p	NM_003942	RPS6KA4	circRNA	chr11	64138939	64138960	+	1	0	AGO1-4	7mer-m8	ggaguaccuucccaAGGGGUGa	ugccccccuccuaaUCCCCACc
MIMAT0002807	hsa-miR-491-5p	NM_001198868	CAPN1	circRNA	chr11	64979064	64979085	+	7	0	AGO1-4,AGO2	7mer-m8	ggaguaccuucccaAGGGGUGa	ugauguguccccucUCCCCACu
MIMAT0002807	hsa-miR-491-5p	NM_006779	CDC42EP2	circRNA	chr11	65088776	65088797	+	2	0	AGO1-4	8mer	ggaguaccuUCCCAAGGGGUGa	agaccccucAGCCUUCCCCACa
MIMAT0002807	hsa-miR-491-5p	NM_006779	CDC42EP2	circRNA	chr11	65088981	65088999	+	1	0	AGO1-4	8mer	ggaGUACCUUCCCAAGGGGUGa	cagCAUGCA---GAUCCCCACa
MIMAT0002807	hsa-miR-491-5p	NM_006779	CDC42EP2	circRNA	chr11	65089499	65089520	+	17	0	AGO1-4,AGO2	7mer-m8	ggaguaccuucccAAGGGGUGa	uagcuccaaucccUUCCCCACg
MIMAT0002807	hsa-miR-491-5p	NM_006268	DPF2	circRNA	chr11	65119905	65119926	+	5	0	AGO1-4,AGO2	7mer-m8	ggAGUACCUUCCCAAGGGGUGa	agUGACUGAAGCAUUCCCCACc
MIMAT0002807	hsa-miR-491-5p	hsa_circ_0003812	hsa_circ_0003812	circRNA	chr11	65200306	65200327	+	6	0	AGO1-4	7mer-m8	ggaguaccuucccaAGGGGUGa	ccccccucuuacccUCCCCACu
MIMAT0002807	hsa-miR-491-5p	hsa_circ_0002791	hsa_circ_0002791	circRNA	chr11	65204418	65204438	+	7	0	AGO1-4	8mer	ggaGUACCUUCCCAAGGGGUGa	uccCAUUG-ACAUUUCCCCACa
MIMAT0002807	hsa-miR-491-5p	hsa_circ_0003812	hsa_circ_0003812	circRNA	chr11	65204418	65204438	+	7	0	AGO1-4	8mer	ggaGUACCUUCCCAAGGGGUGa	uccCAUUG-ACAUUUCCCCACa
MIMAT0002807	hsa-miR-491-5p	hsa_circ_0006417	hsa_circ_0006417	circRNA	chr11	65204418	65204438	+	7	0	AGO1-4	8mer	ggaGUACCUUCCCAAGGGGUGa	uccCAUUG-ACAUUUCCCCACa
MIMAT0002807	hsa-miR-491-5p	hsa_circ_0007185	hsa_circ_0007185	circRNA	chr11	65204418	65204438	+	7	0	AGO1-4	8mer	ggaGUACCUUCCCAAGGGGUGa	uccCAUUG-ACAUUUCCCCACa
MIMAT0002807	hsa-miR-491-5p	NM_002419	MAP3K11	circRNA	chr11	65365856	65365877	-	1	0	AGO1-4	7mer-m8	ggaguaccuUCCCAAGGGGUGa	accccuucuGGGACUCCCCACc
MIMAT0002807	hsa-miR-491-5p	NM_005507	CFL1	circRNA	chr11	65622491	65622512	-	30	1	AGO1,AGO1-4,AGO2	7mer-m8	ggaguaccuucccAAGGGGUGa	aacaacauccccaUUCCCCACc
MIMAT0002807	hsa-miR-491-5p	NM_030981	RAB1B	circRNA	chr11	66044227	66044248	+	4	0	AGO1,AGO1-4,AGO2	7mer-m8	ggaguaccuucccaAGGGGUGa	cccacccuuuccucUCCCCACu
MIMAT0002807	hsa-miR-491-5p	NM_030981	RAB1B	circRNA	chr11	66044534	66044555	+	7	0	AGO1-4,AGO2	7mer-m8	ggaguaccuucccaAGGGGUGa	cacaucuggcucacUCCCCACu
MIMAT0002807	hsa-miR-491-5p	NM_006876	B3GNT1	circRNA	chr11	66114856	66114877	-	1	0	AGO2	7mer-m8	ggaguaccuucccaAGGGGUGa	aguucuuucccccgUCCCCACg
MIMAT0002807	hsa-miR-491-5p	NM_001198845	RBM14-RBM4	circRNA	chr11	66411447	66411468	+	9	2	AGO1-4,AGO2	7mer-m8	ggaguaccuucccaAGGGGUGa	cgcuacagccccagUCCCCACu
MIMAT0002807	hsa-miR-491-5p	NM_002896	RBM4	circRNA	chr11	66411447	66411468	+	9	2	AGO1-4,AGO2	7mer-m8	ggaguaccuucccaAGGGGUGa	cgcuacagccccagUCCCCACu
MIMAT0002807	hsa-miR-491-5p	NM_031492	RBM4B	circRNA	chr11	66436230	66436251	-	2	0	AGO1-4	8mer	ggaguaccuuccCAAGGGGUGa	ugcugcagccauGCUCCCCACa
MIMAT0002807	hsa-miR-491-5p	NM_006946	SPTBN2	circRNA	chr11	66452847	66452868	-	4	0	AGO1-4,AGO2	7mer-m8	ggaguaccuucccaAGGGGUGa	gcaggagcccucccUCCCCACc
MIMAT0002807	hsa-miR-491-5p	NM_012308	KDM2A	circRNA	chr11	66999371	66999392	+	3	0	AGO1-4	8mer	ggaGUACCUUCCCAAGGGGUGa	gcaCAAGAAAUGUGUCCCCACa
MIMAT0002807	hsa-miR-491-5p	NM_012308	KDM2A	circRNA	chr11	67012660	67012674	+	6	0	AGO1-4	7mer-m8	ggaguaccuucccAAGGGGUGa	#NAME?
MIMAT0002807	hsa-miR-491-5p	NM_198517	TBC1D10C	circRNA	chr11	67174432	67174453	+	1	0	AGO1-4	8mer	ggaguaccuucccAAGGGGUGa	ccgcucccugcccUUCCCCACa
MIMAT0002807	hsa-miR-491-5p	NM_004910	PITPNM1	circRNA	chr11	67264749	67264770	-	1	0	AGO2	7mer-m8	ggaguaccuucCCAAGGGGUGa	ucuuccucuucGGCUCCCCACu
MIMAT0002807	hsa-miR-491-5p	NM_007103	NDUFV1	circRNA	chr11	67376126	67376152	+	1	0	AGO2	7mer-m8	ggaGUACCUUC----CC-AAGGGGUGa	ggcCGUGGAGGCGCUGGCUUCCCCACu
MIMAT0002807	hsa-miR-491-5p	NM_030930	UNC93B1	circRNA	chr11	67758692	67758713	-	2	1	AGO1-4,AGO2	8mer	ggaguaccuuccCAAGGGGUGa	cggcccgcuccaGAUCCCCACa
MIMAT0002807	hsa-miR-491-5p	NM_138768	MYEOV	circRNA	chr11	69151985	69152006	+	1	0	AGO1-4	7mer-m8	ggaguaccuucccaAGGGGUGa	aaucagucagccacUCCCCACu
MIMAT0002807	hsa-miR-491-5p	NM_012309	SHANK2	circRNA	chr11	70333702	70333723	-	2	0	AGO2	7mer-m8	ggaguaccuucccaAGGGGUGa	agucugugcccccgUCCCCACc
MIMAT0002807	hsa-miR-491-5p	NM_006185	NUMA1	circRNA	chr11	71730612	71730634	-	2	0	AGO1-4	7mer-m8	ggaGUACCUUCCCA-AGGGGUGa	uucCCUGAAGAGCUCUCCCCACc
MIMAT0002807	hsa-miR-491-5p	NM_016724	FOLR1	circRNA	chr11	71906978	71906999	+	1	0	AGO2	8mer	ggaguaccuucccAAGGGGUGa	uuuccauuucuacUUCCCCACa
MIMAT0002807	hsa-miR-491-5p	NM_006645	STARD10	circRNA	chr11	72492233	72492254	-	1	0	AGO1-4	8mer	ggaguaccuUCCCAAGGGGUGa	cagggcccuGGGCCUCCCCACa
MIMAT0002807	hsa-miR-491-5p	NM_003355	UCP2	circRNA	chr11	73685936	73685957	-	4	2	AGO1-4	7mer-m8	ggaguaccuucccAAGGGGUGa	ucuccuucccucuUUCCCCACc
MIMAT0002807	hsa-miR-491-5p	NM_015531	C2CD3	circRNA	chr11	73726326	73726351	-	1	0	AGO1-4	7mer-m8	ggaguaccUUCCCA----AGGGGUGa	uuacuacaAAGAGUCUCCUCCCCACc
MIMAT0002807	hsa-miR-491-5p	NM_015531	C2CD3	circRNA	chr11	73734240	73734261	-	1	0	AGO2	8mer	ggaguaccuuCCCAAGGGGUGa	ugauugcccuGGUUUCCCCACa
MIMAT0002807	hsa-miR-491-5p	NM_006591	POLD3	circRNA	chr11	74345655	74345676	+	2	0	AGO1-4,AGO2	7mer-m8	ggaguaccuucccaAGGGGUGa	aagcugagucaccaUCCCCACc
MIMAT0002807	hsa-miR-491-5p	NM_004041	ARRB1	circRNA	chr11	74976647	74976668	-	2	0	AGO1-4	7mer-m8	ggaguaccuucccaAGGGGUGa	ugccuucacccuccUCCCCACc
MIMAT0002807	hsa-miR-491-5p	NM_001005	RPS3	circRNA	chr11	75115882	75115903	+	16	2	AGO1-4,AGO2	8mer	ggaguaccuucccaAGGGGUGa	caugccccagccagUCCCCACa
MIMAT0002807	hsa-miR-491-5p	NM_015516	TSKU	circRNA	chr11	76507978	76507999	+	5	0	AGO1-4,AGO2	7mer-m8	ggaguaccuucccAAGGGGUGa	ccuccugcuucccUUCCCCACu
MIMAT0002807	hsa-miR-491-5p	NM_015516	TSKU	circRNA	chr11	76508728	76508749	+	7	0	AGO1-4,AGO2	7mer-m8	ggAGUACCUUCCCAAGGGGUGa	ccUCCUGGAUUCAGUCCCCACu
MIMAT0002807	hsa-miR-491-5p	NM_018367	ACER3	circRNA	chr11	76583052	76583073	+	1	0	AGO1-4	7mer-m8	ggaguaccuucccaAGGGGUGa	auaucugaccccucUCCCCACc
MIMAT0002807	hsa-miR-491-5p	NM_018367	ACER3	circRNA	chr11	76633536	76633557	+	1	0	AGO2	7mer-m8	ggaguaccuucCCAAGGGGUGa	ucaaucugucuGGCUCCCCACc
MIMAT0002807	hsa-miR-491-5p	NM_018367	ACER3	circRNA	chr11	76734107	76734128	+	1	0	AGO1-4	7mer-m8	ggaguaccuucccaAGGGGUGa	ugcccacuaccuacUCCCCACc
MIMAT0002807	hsa-miR-491-5p	NM_018367	ACER3	circRNA	chr11	76734135	76734154	+	1	0	AGO1-4	7mer-m8	ggAGUACCUUCCCAAGGGGUGa	uuUCAUGAAA--CAUCCCCACc
MIMAT0002807	hsa-miR-491-5p	NM_001007027	ALG8	circRNA	chr11	77850542	77850563	-	3	0	AGO1-4,AGO2	8mer	ggaguaccuucccaAGGGGUGa	caaaugccuucucaUCCCCACa
MIMAT0002807	hsa-miR-491-5p	NM_007173	PRSS23	circRNA	chr11	85645890	85645911	+	2	0	AGO1-4	7mer-m8	ggaguaccuucccAAGGGGUGa	gaucuacaucaccUUCCCCACc
MIMAT0002807	hsa-miR-491-5p	NM_007173	PRSS23	circRNA	chr11	85985592	85985617	+	1	0	AGO1-4	7mer-m8	ggagUACCUU----CCCAAGGGGUGa	ugggGUGGAAGUCUGGGUUCCCCACu
MIMAT0002807	hsa-miR-491-5p	NM_007173	PRSS23	circRNA	chr11	86519723	86519743	+	8	0	AGO1-4,AGO2	8mer	ggaGUACCUUCCCAAGGGGUGa	ggaCAU-GAAUGGUUCCCCACa
MIMAT0002807	hsa-miR-491-5p	NM_007173	PRSS23	circRNA	chr11	86681052	86681073	+	1	0	AGO1-4	7mer-m8	ggAGUACCUUCCCAAGGGGUGa	cuUCUUAGAGGAAUUCCCCACc
MIMAT0002807	hsa-miR-491-5p	NM_024116	TAF1D	circRNA	chr11	93465425	93465448	-	3	0	AGO1,AGO1-4	7mer-m8	ggaguaccuUCC--CAAGGGGUGa	uugagaaccAGGUAGAUCCCCACc
MIMAT0002807	hsa-miR-491-5p	NM_001243571	MTMR2	circRNA	chr11	95566325	95566346	-	3	0	AGO1-4,AGO2	7mer-m8	ggaguaccuucccaAGGGGUGa	ugcagauuccugccUCCCCACu
MIMAT0002807	hsa-miR-491-5p	NM_006169	NNMT	circRNA	chr11	114182908	114182929	+	7	0	AGO1-4,AGO2	7mer-m8	ggaguaccuUCCCAAGGGGUGa	cgccugcccAGACCUCCCCACc
MIMAT0002807	hsa-miR-491-5p	NM_025164	SIK3	circRNA	chr11	116729247	116729269	-	1	0	AGO2	7mer-m8	ggaGU-ACCUUCCCAAGGGGUGa	cucCACUUGACCAAUUCCCCACc
MIMAT0002807	hsa-miR-491-5p	NM_001184746	PAFAH1B2	circRNA	chr11	117031865	117031886	+	7	0	AGO1,AGO1-4,AGO2	7mer-m8	ggaguaccuucccAAGGGGUGa	ggcgagagcuuuuUUCCCCACu
MIMAT0002807	hsa-miR-491-5p	NM_002572	PAFAH1B2	circRNA	chr11	117031865	117031886	+	7	0	AGO1,AGO1-4,AGO2	7mer-m8	ggaguaccuucccAAGGGGUGa	ggcgagagcuuuuUUCCCCACu
MIMAT0002807	hsa-miR-491-5p	NM_001040455	SIDT2	circRNA	chr11	117067140	117067161	+	1	0	AGO2	8mer	ggaguaccuucccaAGGGGUGa	uuugcccguccuccUCCCCACa
MIMAT0002807	hsa-miR-491-5p	NM_001077239	RNF214	circRNA	chr11	117109653	117109676	+	3	0	AGO2	8mer	ggaguacCUUCCC--AAGGGGUGa	uugcucuGAAGAGAAAUCCCCACa
MIMAT0002807	hsa-miR-491-5p	NM_207343	RNF214	circRNA	chr11	117109653	117109676	+	3	0	AGO2	8mer	ggaguacCUUCCC--AAGGGGUGa	uugcucuGAAGAGAAAUCCCCACa
MIMAT0002807	hsa-miR-491-5p	NM_004788	UBE4A	circRNA	chr11	118253304	118253320	+	1	0	AGO1-4	7mer-m8	ggagUACCUUCCCAAGGGGUGa	#NAME?
MIMAT0002807	hsa-miR-491-5p	NM_001197104	MLL	circRNA	chr11	118380687	118380708	+	2	0	AGO2	7mer-m8	ggaguaccuuccCAAGGGGUGa	aaaguaauuucaGCUCCCCACu
MIMAT0002807	hsa-miR-491-5p	NM_001164277	SLC37A4	circRNA	chr11	118895283	118895304	-	2	0	AGO1-4	7mer-m8	ggaguaccuucccaAGGGGUGa	cgcauccuaccccaUCCCCACc
MIMAT0002807	hsa-miR-491-5p	NM_014807	C2CD2L	circRNA	chr11	118986992	118987013	+	1	0	AGO1-4	7mer-m8	ggaguaccuucccAAGGGGUGa	uucucucagcccaUUCCCCACc
MIMAT0002807	hsa-miR-491-5p	NM_014807	C2CD2L	circRNA	chr11	118987526	118987552	+	1	0	AGO2	7mer-m8	ggagUACCUUC---CCA--AGGGGUGa	cgggAUGGGGGGCAGGUACUCCCCACc
MIMAT0002807	hsa-miR-491-5p	NM_015645	C1QTNF5	circRNA	chr11	119209713	119209734	-	1	0	AGO1-4	7mer-m8	ggaguaccuucccaAGGGGUGa	gcuucucuggauccUCCCCACc
MIMAT0002807	hsa-miR-491-5p	NM_031433	MFRP	circRNA	chr11	119209713	119209734	-	1	0	AGO1-4	7mer-m8	ggaguaccuucccaAGGGGUGa	gcuucucuggauccUCCCCACc
MIMAT0002807	hsa-miR-491-5p	NM_006288	THY1	circRNA	chr11	119290793	119290814	-	3	0	AGO1-4,AGO2	7mer-m8	ggaguaccuucccAAGGGGUGa	accacucuggccaUUCCCCACc
MIMAT0002807	hsa-miR-491-5p	NM_138342	GLB1L2	circRNA	chr11	134217057	134217078	+	1	0	AGO1-4	7mer-m8	ggaguACCUUCCCAAGGGGUGa	cgguuUGCAUUGUCUCCCCACu
MIMAT0002807	hsa-miR-491-5p	NM_001042603	KDM5A	circRNA	chr12	498287	498308	-	1	0	AGO2	7mer-m8	ggAGUACCUUCCCAAGGGGUGa	uuUUCUCCACCGGUUCCCCACg
MIMAT0002807	hsa-miR-491-5p	NM_001184985	WNK1	circRNA	chr12	978164	978185	+	1	0	AGO1-4	7mer-m8	ggaguaccuUCCCAAGGGGUGa	caguguuacAAGAAUCCCCACu
MIMAT0002807	hsa-miR-491-5p	NM_213655	WNK1	circRNA	chr12	978164	978185	+	1	0	AGO1-4	7mer-m8	ggaguaccuUCCCAAGGGGUGa	caguguuacAAGAAUCCCCACu
MIMAT0002807	hsa-miR-491-5p	NM_001184985	WNK1	circRNA	chr12	994256	994275	+	10	0	AGO1-4,AGO2	8mer	ggAGU-ACCUUCCCAAGGGGUGa	cgUCACUUCAAG---UCCCCACa
MIMAT0002807	hsa-miR-491-5p	NM_014823	WNK1	circRNA	chr12	994256	994275	+	10	0	AGO1-4,AGO2	8mer	ggAGU-ACCUUCCCAAGGGGUGa	cgUCACUUCAAG---UCCCCACa
MIMAT0002807	hsa-miR-491-5p	NM_018979	WNK1	circRNA	chr12	994256	994275	+	10	0	AGO1-4,AGO2	8mer	ggAGU-ACCUUCCCAAGGGGUGa	cgUCACUUCAAG---UCCCCACa
MIMAT0002807	hsa-miR-491-5p	NR_027948	ERC1	circRNA	chr12	1601121	1601142	+	1	0	AGO1-4	7mer-m8	ggaguaccuucccAAGGGGUGa	uuuucuccucuccUUCCCCACu
MIMAT0002807	hsa-miR-491-5p	NM_018463	ITFG2	circRNA	chr12	2933640	2933660	+	1	0	AGO1-4	7mer-m8	ggaGUACCUUCCCAAGGGGUGa	ggaCAU-GACCCACUCCCCACu
MIMAT0002807	hsa-miR-491-5p	NM_003324	TULP3	circRNA	chr12	3040343	3040370	+	9	0	AGO1-4,AGO2	7mer-m8	ggagUACCU--UCCC----AAGGGGUGa	gggaAUGGAUCGGGGUCUCUUCCCCACc
MIMAT0002807	hsa-miR-491-5p	NM_006675	TSPAN9	circRNA	chr12	3392604	3392625	+	1	0	AGO1-4	8mer	ggaguaccuucccaAGGGGUGa	acacugacacuuugUCCCCACa
MIMAT0002807	hsa-miR-491-5p	NM_006675	TSPAN9	circRNA	chr12	3395430	3395451	+	1	1	AGO2	7mer-m8	ggaguaccuucccaAGGGGUGa	ccacacuuuccuccUCCCCACu
MIMAT0002807	hsa-miR-491-5p	NM_000552	VWF	circRNA	chr12	6091121	6091143	-	2	0	AGO1-4	7mer-m8	ggaguaccUUCCCA-AGGGGUGa	gagugcaaAAGAGUGUCCCCACc
MIMAT0002807	hsa-miR-491-5p	NM_000552	VWF	circRNA	chr12	6127547	6127568	-	3	0	AGO1-4	7mer-m8	ggaguaccuuccCAAGGGGUGa	agaggggcugcaGAUCCCCACc
MIMAT0002807	hsa-miR-491-5p	NM_001159576	SCNN1A	circRNA	chr12	6456784	6456805	-	1	0	AGO2	7mer-m8	ggaguaccuuCCCAAGGGGUGa	ugaacacucuGGUUUCCCCACc
MIMAT0002807	hsa-miR-491-5p	NM_002046	GAPDH	circRNA	chr12	6646913	6646935	+	26	5	AGO1,AGO1-4,AGO2	7mer-m8	ggaguaccuuccCA-AGGGGUGa	gcauggccuuccGUGUCCCCACu
MIMAT0002807	hsa-miR-491-5p	NM_001273	CHD4	circRNA	chr12	6679577	6679603	-	6	0	AGO1,AGO1-4	7mer-m8	ggAGUACCU---UCCCA--AGGGGUGa	ccUUCUGGACCCUGGCUUCUCCCCACu
MIMAT0002807	hsa-miR-491-5p	NM_001135734	ZNF384	circRNA	chr12	6788633	6788654	-	1	1	AGO2	8mer	ggaguaccuucccaAGGGGUGa	cuucuggccuucuaUCCCCACa
MIMAT0002807	hsa-miR-491-5p	NR_026581	MLF2	circRNA	chr12	6862186	6862207	-	6	0	AGO1-4,AGO2	7mer-m8	ggaguaccuucccaAGGGGUGa	caagcccggaccaaUCCCCACg
MIMAT0002807	hsa-miR-491-5p	NM_006331	EMG1	circRNA	chr12	7101543	7101563	+	1	0	AGO2	7mer-m8	ggAGUACCUUCCCAAGGGGUGa	ggUUGU-GCAGCCAUCCCCACu
MIMAT0002807	hsa-miR-491-5p	NM_001733	C1R	circRNA	chr12	7244123	7244144	-	3	0	AGO1-4,AGO2	7mer-m8	ggaguaccuucccaAGGGGUGa	cacugugaucacagUCCCCACg
MIMAT0002807	hsa-miR-491-5p	NM_014718	CLSTN3	circRNA	chr12	7310676	7310697	+	1	3	AGO1-4	7mer-m8	ggaguaccuucccaAGGGGUGa	aaggccuacaccucUCCCCACg
MIMAT0002807	hsa-miR-491-5p	NM_018416	FOXJ2	circRNA	chr12	8200789	8200810	+	2	0	AGO1-4	7mer-m8	ggaguaccuucccaAGGGGUGa	ccucaucagcaccaUCCCCACu
MIMAT0002807	hsa-miR-491-5p	NM_001097643	TAS2R30	circRNA	chr12	11284645	11284666	-	1	0	AGO2	8mer	ggaguaccuucccaAGGGGUGa	cuuaagauaaaucaUCCCCACa
MIMAT0002807	hsa-miR-491-5p	NM_001175	ARHGDIB	circRNA	chr12	15095433	15095454	-	4	1	AGO1-4,AGO2	7mer-m8	ggaguaccuucccAAGGGGUGa	ugcauccaccccuUUCCCCACc
MIMAT0002807	hsa-miR-491-5p	NM_016551	TM7SF3	circRNA	chr12	27127065	27127086	-	3	1	AGO1-4,AGO2	7mer-m8	ggaguaccuucccaAGGGGUGa	cgaccguucuucccUCCCCACc
MIMAT0002807	hsa-miR-491-5p	NM_177444	PPFIBP1	circRNA	chr12	27475343	27475364	+	10	0	AGO1,AGO1-4,AGO2,AGO3	7mer-m8	ggaguaccuucccaAGGGGUGa	ucaacguggcucuaUCCCCACc
MIMAT0002807	hsa-miR-491-5p	NM_175861	TMTC1	circRNA	chr12	29881253	29881274	-	1	0	AGO1-4	7mer-m8	ggaguaccuucccaAGGGGUGa	gcguggccuccuccUCCCCACg
MIMAT0002807	hsa-miR-491-5p	NM_144973	DENND5B	circRNA	chr12	31536564	31536585	-	1	0	AGO1-4	7mer-m8	ggaguaccuucccaAGGGGUGa	aaaccucccaacccUCCCCACc
MIMAT0002807	hsa-miR-491-5p	NM_052885	SLC2A13	circRNA	chr12	40258621	40258642	-	2	0	AGO2	7mer-m8	ggAGUACCUUCCCAAGGGGUGa	uaUCAGCCCAAGUUUCCCCACg
MIMAT0002807	hsa-miR-491-5p	NM_030674	SLC38A1	circRNA	chr12	46582700	46582718	-	11	0	AGO1-4,AGO2	8mer	ggAGUACCUUCCCAAGGGGUGa	gcUCAGUCAAG---UCCCCACa
MIMAT0002807	hsa-miR-491-5p	NM_018976	SLC38A2	circRNA	chr12	46752089	46752109	-	35	0	AGO1,AGO1-4,AGO2,AGO3	7mer-m8	ggAGUACCUUCCCAAGGGGUGa	uaUAGUGUAA-AUAUCCCCACu
MIMAT0002807	hsa-miR-491-5p	NM_001659	ARF3	circRNA	chr12	49331837	49331858	-	6	0	AGO1-4,AGO2	7mer-m8	ggAGUACCUUCCCAAGGGGUGa	guUCAACUGAUCCUUCCCCACc
MIMAT0002807	hsa-miR-491-5p	NM_001659	ARF3	circRNA	chr12	49332358	49332379	-	11	0	AGO1-4,AGO2	8mer	ggaguaccuucccaAGGGGUGa	gaguccuuucccugUCCCCACa
MIMAT0002807	hsa-miR-491-5p	NM_003482	MLL2	circRNA	chr12	49414068	49414089	-	9	0	AGO1-4,AGO2	7mer-m8	ggaguaccuucccaAGGGGUGa	accccccaccccacUCCCCACc
MIMAT0002807	hsa-miR-491-5p	NM_003482	MLL2	circRNA	chr12	49415359	49415380	-	3	0	AGO1,AGO1-4,AGO2	7mer-m8	ggaguaccuucccAAGGGGUGa	agggacaauccucUUCCCCACc
MIMAT0002807	hsa-miR-491-5p	NM_003482	MLL2	circRNA	chr12	49433724	49433743	-	1	0	AGO1-4	7mer-m8	ggaGUACCUUCCCAAGGGGUGa	agcUAUGGGCUG--UCCCCACu
MIMAT0002807	hsa-miR-491-5p	NM_003482	MLL2	circRNA	chr12	49434980	49435004	-	4	0	AGO1-4,AGO2	7mer-m8	ggaGUACCUU---CCCAAGGGGUGa	uccCCUGGAGCCCCGCUUCCCCACg
MIMAT0002807	hsa-miR-491-5p	NM_003482	MLL2	circRNA	chr12	49445337	49445358	-	3	0	AGO1-4,AGO2	7mer-m8	ggaguaccuucCCAAGGGGUGa	aggacucaccuGCUUCCCCACc
MIMAT0002807	hsa-miR-491-5p	NM_003482	MLL2	circRNA	chr12	49445364	49445385	-	2	1	AGO1-4	7mer-m8	ggaguaccuucccaAGGGGUGa	aggacucccccacaUCCCCACc
MIMAT0002807	hsa-miR-491-5p	NM_003482	MLL2	circRNA	chr12	49445391	49445412	-	5	1	AGO1-4,AGO2	7mer-m8	ggaguaccuucccaAGGGGUGa	aggcuucacgccucUCCCCACc
MIMAT0002807	hsa-miR-491-5p	NM_003482	MLL2	circRNA	chr12	49445445	49445466	-	10	0	AGO1-4,AGO2	7mer-m8	ggaguaccuucccaAGGGGUGa	aggaaucucccuugUCCCCACc
MIMAT0002807	hsa-miR-491-5p	NM_003482	MLL2	circRNA	chr12	49445553	49445574	-	3	0	AGO1-4	7mer-m8	ggaguaccuucccaAGGGGUGa	aggacucgccuaugUCCCCACc
MIMAT0002807	hsa-miR-491-5p	NM_003482	MLL2	circRNA	chr12	49445580	49445601	-	3	1	AGO1-4	7mer-m8	ggaguaccuucccaAGGGGUGa	aggcaucacgccugUCCCCACc
MIMAT0002807	hsa-miR-491-5p	NM_003482	MLL2	circRNA	chr12	49445607	49445628	-	5	0	AGO1-4,AGO2	7mer-m8	ggaguaccuucccAAGGGGUGa	aggagucuccccuUUCCCCACc
MIMAT0002807	hsa-miR-491-5p	NM_003482	MLL2	circRNA	chr12	49445823	49445844	-	3	0	AGO1-4,AGO2	7mer-m8	ggaguaccuucccaAGGGGUGa	aagcaucgccccugUCCCCACc
MIMAT0002807	hsa-miR-491-5p	NM_003482	MLL2	circRNA	chr12	49445850	49445871	-	6	0	AGO1-4,AGO2	7mer-m8	ggaguaccuucccaAGGGGUGa	uugagacgccucuaUCCCCACc
MIMAT0002807	hsa-miR-491-5p	NM_003482	MLL2	circRNA	chr12	49446030	49446051	-	7	0	AGO1,AGO1-4,AGO2	7mer-m8	ggagUACCUUCCCAAGGGGUGa	aggaAUUGCCCGCAUCCCCACu
MIMAT0002807	hsa-miR-491-5p	NM_003482	MLL2	circRNA	chr12	49446084	49446105	-	4	0	AGO1-4,AGO2	7mer-m8	ggaguaccuucccaAGGGGUGa	aggaaucacccacgUCCCCACc
MIMAT0002807	hsa-miR-491-5p	NM_003482	MLL2	circRNA	chr12	49446111	49446132	-	3	0	AGO1-4,AGO2	7mer-m8	ggaguaccuucccaAGGGGUGa	aggagucaccccugUCCCCACc
MIMAT0002807	hsa-miR-491-5p	NM_023071	SPATS2	circRNA	chr12	49829853	49829874	+	1	0	AGO1-4	7mer-m8	ggaguaccuucccAAGGGGUGa	auuucucaaucuuUUCCCCACc
MIMAT0002807	hsa-miR-491-5p	NM_175736	FMNL3	circRNA	chr12	50059960	50059984	-	1	0	AGO1-4	8mer	ggaGUAC-CUUCCCA--AGGGGUGa	uucCAGGUGAAGAAUCCUCCCCACa
MIMAT0002807	hsa-miR-491-5p	NM_147190	CERS5	circRNA	chr12	50524009	50524030	-	3	0	AGO2	7mer-m8	ggaguaccuuccCAAGGGGUGa	gaggccuucccuGGUCCCCACu
MIMAT0002807	hsa-miR-491-5p	NM_001174126	SLC11A2	circRNA	chr12	51386051	51386072	-	2	0	AGO1-4,AGO2	7mer-m8	ggaguaccuucccaAGGGGUGa	cucuauugccaucaUCCCCACu
MIMAT0002807	hsa-miR-491-5p	NM_001174129	SLC11A2	circRNA	chr12	51386051	51386072	-	2	0	AGO1-4,AGO2	7mer-m8	ggaguaccuucccaAGGGGUGa	cucuauugccaucaUCCCCACu
MIMAT0002807	hsa-miR-491-5p	NM_001136264	DAZAP2	circRNA	chr12	51634681	51634702	+	11	0	AGO1,AGO1-4,AGO2	7mer-m8	ggaguaccuucccaAGGGGUGa	aggggcugccacagUCCCCACc
MIMAT0002807	hsa-miR-491-5p	NM_014764	DAZAP2	circRNA	chr12	51634681	51634702	+	11	0	AGO1,AGO1-4,AGO2	7mer-m8	ggaguaccuucccaAGGGGUGa	aggggcugccacagUCCCCACc
MIMAT0002807	hsa-miR-491-5p	NM_000020	ACVRL1	circRNA	chr12	52314894	52314915	+	1	0	AGO1-4	7mer-m8	ggaguaccuucccaAGGGGUGa	gacgccuggcucucUCCCCACc
MIMAT0002807	hsa-miR-491-5p	NM_000424	KRT5	circRNA	chr12	52908429	52908452	-	1	0	AGO1-4	7mer-m8	ggAGUACCUU--CCCAAGGGGUGa	aaUCAUCAAAACAGAAUCCCCACc
MIMAT0002807	hsa-miR-491-5p	NM_000966	RARG	circRNA	chr12	53605351	53605372	-	1	0	AGO1-4	7mer-m8	ggaguaccuucccaAGGGGUGa	ccugcucugcccucUCCCCACc
MIMAT0002807	hsa-miR-491-5p	NM_000966	RARG	circRNA	chr12	53605528	53605551	-	1	0	AGO2	7mer-m8	ggAGUACCUUC--CCAAGGGGUGa	acUCCUCGCAGCCUGGUCCCCACc
MIMAT0002807	hsa-miR-491-5p	NM_138473	SP1	circRNA	chr12	53806241	53806262	+	2	0	AGO1,AGO2	7mer-m8	ggaguaccuucccaAGGGGUGa	acuucuuuugaacaUCCCCACu
MIMAT0002807	hsa-miR-491-5p	NM_001005354	PRR13	circRNA	chr12	53839926	53839947	+	4	0	AGO1-4,AGO2	7mer-m8	ggaguaccuuCCCAAGGGGUGa	uguagcccuuGUGCUCCCCACc
MIMAT0002807	hsa-miR-491-5p	NM_018457	PRR13	circRNA	chr12	53839926	53839947	+	4	0	AGO1-4,AGO2	7mer-m8	ggaguaccuuCCCAAGGGGUGa	uguagcccuuGUGCUCCCCACc
MIMAT0002807	hsa-miR-491-5p	NM_005016	PCBP2	circRNA	chr12	53858565	53858586	+	11	1	AGO1,AGO1-4,AGO2	8mer	ggagUACCUUCCCAAGGGGUGa	gacaGUGCGAGCUUUCCCCACa
MIMAT0002807	hsa-miR-491-5p	NM_018457	PRR13	circRNA	chr12	53858565	53858586	+	11	1	AGO1,AGO1-4,AGO2	8mer	ggagUACCUUCCCAAGGGGUGa	gacaGUGCGAGCUUUCCCCACa
MIMAT0002807	hsa-miR-491-5p	NM_031989	PCBP2	circRNA	chr12	53858565	53858586	+	11	1	AGO1,AGO1-4,AGO2	8mer	ggagUACCUUCCCAAGGGGUGa	gacaGUGCGAGCUUUCCCCACa
MIMAT0002807	hsa-miR-491-5p	NM_005016	PCBP2	circRNA	chr12	53874320	53874340	+	1	0	AGO1-4	7mer-m8	ggagUACCUUCCCAAGGGGUGa	uacaGUAGGACAG-UCCCCACc
MIMAT0002807	hsa-miR-491-5p	NM_001130059	ATF7	circRNA	chr12	53931245	53931268	-	1	0	AGO2	7mer-m8	ggaguaCCUUCCCA--AGGGGUGa	aguggaGGUAGACUCAUCCCCACc
MIMAT0002807	hsa-miR-491-5p	NM_006856	ATF7	circRNA	chr12	53931245	53931268	-	1	0	AGO2	7mer-m8	ggaguaCCUUCCCA--AGGGGUGa	aguggaGGUAGACUCAUCCCCACc
MIMAT0002807	hsa-miR-491-5p	NM_001127322	CBX5	circRNA	chr12	54634832	54634853	-	8	0	AGO1-4,AGO2	7mer-m8	ggaguaccuUCCCAAGGGGUGa	auugcuuuuAGCACUCCCCACu
MIMAT0002807	hsa-miR-491-5p	NM_016057	COPZ1	circRNA	chr12	54745414	54745435	+	1	0	AGO2	8mer	ggaguaccuucccaAGGGGUGa	gacccagaacuuccUCCCCACa
MIMAT0002807	hsa-miR-491-5p	NM_001184796	ESYT1	circRNA	chr12	56531018	56531040	+	12	0	AGO1-4,AGO2	7mer-m8	ggAGUACCU-UCCCAAGGGGUGa	caUCAGAAAUAUGCUUCCCCACg
MIMAT0002807	hsa-miR-491-5p	NM_015292	ESYT1	circRNA	chr12	56531018	56531040	+	12	0	AGO1-4,AGO2	7mer-m8	ggAGUACCU-UCCCAAGGGGUGa	caUCAGAAAUAUGCUUCCCCACg
MIMAT0002807	hsa-miR-491-5p	NM_001184796	ESYT1	circRNA	chr12	56538139	56538160	+	5	3	AGO1-4,AGO2	7mer-m8	ggaguaccuucccaAGGGGUGa	cauguccaguucugUCCCCACu
MIMAT0002807	hsa-miR-491-5p	NM_015292	ESYT1	circRNA	chr12	56538139	56538160	+	5	3	AGO1-4,AGO2	7mer-m8	ggaguaccuucccaAGGGGUGa	cauguccaguucugUCCCCACu
MIMAT0002807	hsa-miR-491-5p	NM_173595	ANKRD52	circRNA	chr12	56634251	56634272	-	4	1	AGO1-4,AGO2	7mer-m8	ggaguaccuucccaAGGGGUGa	cccccuccccccucUCCCCACc
MIMAT0002807	hsa-miR-491-5p	NM_173595	ANKRD52	circRNA	chr12	56636351	56636373	-	11	0	AGO1-4,AGO2	7mer-m8	ggaGUACCUU-CCCAAGGGGUGa	gggCCUGGAGCUUUUUCCCCACu
MIMAT0002807	hsa-miR-491-5p	NM_004077	CS	circRNA	chr12	56666013	56666034	-	4	5	AGO1-4	7mer-m8	ggaguaccuucccaAGGGGUGa	acuaccuucugaccUCCCCACc
MIMAT0002807	hsa-miR-491-5p	NM_004077	CS	circRNA	chr12	56694007	56694028	-	10	0	AGO1,AGO1-4,AGO2,AGO3	7mer-m8	ggaguaccuucccaAGGGGUGa	cucccuuucuuaccUCCCCACc
MIMAT0002807	hsa-miR-491-5p	NM_013449	BAZ2A	circRNA	chr12	57008962	57008983	-	1	0	AGO1-4	8mer	ggaguaccuucccaAGGGGUGa	cuaguuuuuucaccUCCCCACa
MIMAT0002807	hsa-miR-491-5p	NM_013449	BAZ2A	circRNA	chr12	57009308	57009329	-	13	0	AGO1-4,AGO2	7mer-m8	ggaguaccuuccCAAGGGGUGa	auuuugaacucuGCUCCCCACu
MIMAT0002807	hsa-miR-491-5p	NM_001113203	NACA	circRNA	chr12	57109924	57109945	-	1	0	AGO2	7mer-m8	ggaguaccuucccaAGGGGUGa	ucucugcagcacccUCCCCACc
MIMAT0002807	hsa-miR-491-5p	NM_001113203	NACA	circRNA	chr12	57114878	57114899	-	1	0	AGO2	7mer-m8	ggaguaccuucCCAAGGGGUGa	cugguugcccuGGCUCCCCACu
MIMAT0002807	hsa-miR-491-5p	NM_002332	LRP1	circRNA	chr12	57537492	57537514	+	1	0	AGO1-4	8mer	ggaguaccuuccCA-AGGGGUGa	gccagcaccauuGUGUCCCCACa
MIMAT0002807	hsa-miR-491-5p	NM_014925	R3HDM2	circRNA	chr12	57663616	57663637	-	2	0	AGO1,AGO1-4	7mer-m8	ggaguaccuucccaAGGGGUGa	cacgggucagccccUCCCCACu
MIMAT0002807	hsa-miR-491-5p	NM_014925	R3HDM2	circRNA	chr12	57780682	57780703	-	1	0	AGO1-4	7mer-m8	ggaguaccuucccaAGGGGUGa	aaagguucuccaagUCCCCACc
MIMAT0002807	hsa-miR-491-5p	NM_014925	R3HDM2	circRNA	chr12	57780823	57780844	-	1	0	AGO1-4	7mer-m8	ggaguaccuucccaAGGGGUGa	aaaaguucuccacgUCCCCACu
MIMAT0002807	hsa-miR-491-5p	NM_014925	R3HDM2	circRNA	chr12	57785272	57785293	-	1	0	AGO1-4	8mer	ggaguaccuucccaAGGGGUGa	gcaaaacaguuccaUCCCCACa
MIMAT0002807	hsa-miR-491-5p	NM_052897	MBD6	circRNA	chr12	57923112	57923133	+	1	0	AGO1-4	7mer-m8	ggaguaccuucccaAGGGGUGa	ggugggggcacuacUCCCCACu
MIMAT0002807	hsa-miR-491-5p	NM_052897	MBD6	circRNA	chr12	57923263	57923284	+	2	0	AGO1-4,AGO2	7mer-m8	ggaguaccuucccAAGGGGUGa	gguauauggcccuUUCCCCACc
MIMAT0002807	hsa-miR-491-5p	NM_178502	DTX3	circRNA	chr12	58000819	58000840	+	2	0	AGO1-4,AGO2	8mer	ggaguaccuUCCCAAGGGGUGa	auguucuccAGCUUUCCCCACa
MIMAT0002807	hsa-miR-491-5p	NM_006812	OS9	circRNA	chr12	58114739	58114760	+	5	0	AGO1-4,AGO2	7mer-m8	ggaguaccuucccaAGGGGUGa	acuggcuugccuccUCCCCACc
MIMAT0002807	hsa-miR-491-5p	NM_006812	OS9	circRNA	chr12	58114747	58114768	+	4	0	AGO1-4	7mer-m8	ggaguaccuucccaAGGGGUGa	gccuccuccccaccUCCCCACc
MIMAT0002807	hsa-miR-491-5p	NM_000075	CDK4	circRNA	chr12	58145419	58145441	-	9	2	AGO1,AGO1-4,AGO2	8mer	ggaGUACC-UUCCCAAGGGGUGa	guaCAAGGCCCGUGAUCCCCACa
MIMAT0002807	hsa-miR-491-5p	NM_005730	CTDSP2	circRNA	chr12	58238285	58238306	-	1	0	AGO1-4	7mer-m8	ggaguaccuucCCAAGGGGUGa	aggagcccuguGCUUCCCCACu
MIMAT0002807	hsa-miR-491-5p	NM_153377	LRIG3	circRNA	chr12	59271357	59271378	-	1	0	AGO2	7mer-m8	ggaguaccuuCCCAAGGGGUGa	gcgccucaguGUGAUCCCCACu
MIMAT0002807	hsa-miR-491-5p	NM_016056	TMBIM4	circRNA	chr12	66554247	66554267	-	1	0	AGO1-4	7mer-m8	ggAGUACCUUCCCAAGGGGUGa	auUUAUUUAA-CCAUCCCCACu
MIMAT0002807	hsa-miR-491-5p	NM_001135805	SYT1	circRNA	chr12	79844594	79844615	+	6	1	AGO1-4,AGO2	7mer-m8	ggaguaccuucccAAGGGGUGa	auauuccauauuuUUCCCCACu
MIMAT0002807	hsa-miR-491-5p	NM_005230	ELK3	circRNA	chr12	96660993	96661014	+	11	0	AGO1-4,AGO2	7mer-m8	ggaguaccuucccaAGGGGUGa	augaaacaaauuugUCCCCACg
MIMAT0002807	hsa-miR-491-5p	NM_181861	APAF1	circRNA	chr12	99097213	99097234	+	1	0	AGO2	8mer	ggaguACCUUCCCAAGGGGUGa	aguacUGUGACUUCUCCCCACa
MIMAT0002807	hsa-miR-491-5p	NM_003330	TXNRD1	circRNA	chr12	104743886	104743910	+	12	0	AGO1,AGO1-4,AGO2	8mer	ggagUACCUUCCCA---AGGGGUGa	uggaGUGGAAUGUUCUAUCCCCACa
MIMAT0002807	hsa-miR-491-5p	NM_018413	CHST11	circRNA	chr12	105151412	105151431	+	1	0	AGO2	7mer-m8	ggaguacCUUCCCAAGGGGUGa	gcuaccuGAA--GUUCCCCACc
MIMAT0002807	hsa-miR-491-5p	NM_012406	PRDM4	circRNA	chr12	108154332	108154353	-	3	0	AGO1-4,AGO2	7mer-m8	ggaguaccuuccCAAGGGGUGa	acccugaugccuGUUCCCCACc
MIMAT0002807	hsa-miR-491-5p	NM_170665	ATP2A2	circRNA	chr12	110784830	110784851	+	11	0	AGO1-4,AGO2	7mer-m8	ggaguaccuucccaAGGGGUGa	ccccaccccaccucUCCCCACc
MIMAT0002807	hsa-miR-491-5p	NM_170665	ATP2A2	circRNA	chr12	110786045	110786066	+	1	0	AGO1-4	7mer-m8	ggagUACCUUCCCAAGGGGUGa	uuaaAUAGGCCACUUCCCCACu
MIMAT0002807	hsa-miR-491-5p	NM_016238	ANAPC7	circRNA	chr12	110834240	110834257	-	1	0	AGO2	7mer-m8	ggaguaccuucccaAGGGGUGa	#NAME?
MIMAT0002807	hsa-miR-491-5p	NM_005475	SH2B3	circRNA	chr12	111885856	111885879	+	2	0	AGO1-4	7mer-m8	ggAGUACCUUCCC--AAGGGGUGa	guUCAGAGUUGGGCCUUCCCCACc
MIMAT0002807	hsa-miR-491-5p	NM_001136538	ACAD10	circRNA	chr12	112182810	112182831	+	1	2	AGO1-4	7mer-m8	ggagUACCUUCCCAAGGGGUGa	ccagGUGGAGCCCCUCCCCACu
MIMAT0002807	hsa-miR-491-5p	NM_000690	ALDH2	circRNA	chr12	112219754	112219775	+	3	1	AGO1-4,AGO2	7mer-m8	ggaGUACCUUCCCAAGGGGUGa	cagCAGGAAAACAUUCCCCACc
MIMAT0002807	hsa-miR-491-5p	NM_006187	OAS3	circRNA	chr12	113408732	113408753	+	1	0	AGO1-4	8mer	ggaguaccuucccaAGGGGUGa	gcugagauucugcaUCCCCACa
MIMAT0002807	hsa-miR-491-5p	NM_015335	MED13L	circRNA	chr12	116424257	116424278	-	4	0	AGO1,AGO1-4	7mer-m8	ggaguaccuucccaAGGGGUGa	ugagccguugcccaUCCCCACu
MIMAT0002807	hsa-miR-491-5p	NM_015335	MED13L	circRNA	chr12	116429609	116429630	-	2	1	AGO1-4,AGO2	8mer	ggaguaccuucccaAGGGGUGa	cccucgcuucucugUCCCCACa
MIMAT0002807	hsa-miR-491-5p	NM_001109903	RNFT2	circRNA	chr12	117187711	117187732	+	1	0	AGO2	7mer-m8	ggaGUACCUUCCCAAGGGGUGa	aggCAGAGGCAGCCUCCCCACc
MIMAT0002807	hsa-miR-491-5p	NM_018639	WSB2	circRNA	chr12	118481048	118481069	-	2	0	AGO1-4	7mer-m8	ggaguacCUUCCCAAGGGGUGa	ucagcccGUGGCCUUCCCCACc
MIMAT0002807	hsa-miR-491-5p	NM_003769	SRSF9	circRNA	chr12	120899850	120899871	-	11	0	AGO1,AGO1-4,AGO2,AGO3	8mer	ggagUACCUUCCCAAGGGGUGa	accaAAGCAGGGGUUCCCCACa
MIMAT0002807	hsa-miR-491-5p	NM_006549	CAMKK2	circRNA	chr12	121676475	121676496	-	1	0	AGO2	7mer-m8	ggagUACCUUCCCAAGGGGUGa	gacaAUGCCAUUUCUCCCCACc
MIMAT0002807	hsa-miR-491-5p	NM_001080825	TMEM120B	circRNA	chr12	122219742	122219764	+	1	0	AGO1-4	7mer-m8	ggaGUACCUU-CCCAAGGGGUGa	cagCACCGAGCGCCCUCCCCACc
MIMAT0002807	hsa-miR-491-5p	NM_001178003	WDR66	circRNA	chr12	122380845	122380866	+	1	0	AGO1-4	8mer	ggaguaccuucccaAGGGGUGa	augcacucucgaacUCCCCACa
MIMAT0002807	hsa-miR-491-5p	NM_144668	WDR66	circRNA	chr12	122380845	122380866	+	1	0	AGO1-4	8mer	ggaguaccuucccaAGGGGUGa	augcacucucgaacUCCCCACa
MIMAT0002807	hsa-miR-491-5p	NM_022916	VPS33A	circRNA	chr12	122729239	122729262	-	1	0	AGO1-4	7mer-m8	ggAGUACC-UUCC-CAAGGGGUGa	gaUGGUGGUAAGGACCUCCCCACg
MIMAT0002807	hsa-miR-491-5p	NM_001167856	SBNO1	circRNA	chr12	123778546	123778567	-	4	0	AGO1-4,AGO2	7mer-m8	ggaguaccuucccaAGGGGUGa	caagagcagcacucUCCCCACc
MIMAT0002807	hsa-miR-491-5p	NM_012463	ATP6V0A2	circRNA	chr12	124228358	124228379	+	1	1	AGO2	8mer	ggAGUACCUUCCCAAGGGGUGa	auUCAUGAAUAUAAUCCCCACa
MIMAT0002807	hsa-miR-491-5p	NM_012463	ATP6V0A2	circRNA	chr12	124244711	124244732	+	4	0	AGO2	7mer-m8	ggaguaccuuccCAAGGGGUGa	gaauuguuuacuGCUCCCCACu
MIMAT0002807	hsa-miR-491-5p	NM_001077261	NCOR2	circRNA	chr12	124817757	124817780	-	3	0	AGO1-4,AGO2	7mer-m8	ggaGUACCUU-CCCA-AGGGGUGa	cggUAUUGAACCUGUGUCCCCACc
MIMAT0002807	hsa-miR-491-5p	NM_006312	NCOR2	circRNA	chr12	124817757	124817780	-	3	0	AGO1-4,AGO2	7mer-m8	ggaGUACCUU-CCCA-AGGGGUGa	cggUAUUGAACCUGUGUCCCCACc
MIMAT0002807	hsa-miR-491-5p	NM_006312	NCOR2	circRNA	chr12	124825156	124825177	-	6	0	AGO1-4,AGO2	7mer-m8	ggaguaccuuccCAAGGGGUGa	gccgccacagcaGCUCCCCACu
MIMAT0002807	hsa-miR-491-5p	NM_006312	NCOR2	circRNA	chr12	124825197	124825218	-	6	0	AGO1-4,AGO2	7mer-m8	ggaguaccuucccaAGGGGUGa	ccgccuugccuaccUCCCCACc
MIMAT0002807	hsa-miR-491-5p	NM_001206654	NCOR2	circRNA	chr12	124839089	124839111	-	1	0	AGO1-4	7mer-m8	ggaGUAC-CUUCCCAAGGGGUGa	aagCAGGAGCAGCUGUCCCCACg
MIMAT0002807	hsa-miR-491-5p	NM_006312	NCOR2	circRNA	chr12	124839089	124839111	-	1	0	AGO1-4	7mer-m8	ggaGUAC-CUUCCCAAGGGGUGa	aagCAGGAGCAGCUGUCCCCACg
MIMAT0002807	hsa-miR-491-5p	NM_005505	SCARB1	circRNA	chr12	125292422	125292443	-	3	0	AGO1-4,AGO2	7mer-m8	ggaguACCUUCCCAAGGGGUGa	gguguUUGAAGGCAUCCCCACc
MIMAT0002807	hsa-miR-491-5p	NM_023928	AACS	circRNA	chr12	125609481	125609502	+	3	0	AGO1-4	7mer-m8	ggaguaccuucCCAAGGGGUGa	uccuguccacuGGCUCCCCACu
MIMAT0002807	hsa-miR-491-5p	NM_145648	SLC15A4	circRNA	chr12	129299472	129299496	-	1	0	AGO1-4	7mer-m8	ggAGU-ACC--UUCCCAAGGGGUGa	ugUCACUGGUUAUGCGAUCCCCACu
MIMAT0002807	hsa-miR-491-5p	hsa_circ_0000462	hsa_circ_000157	circRNA	chr12	129299472	129299496	-	1	0	AGO1-4	7mer-m8	ggAGU-ACC--UUCCCAAGGGGUGa	ugUCACUGGUUAUGCGAUCCCCACu
MIMAT0002807	hsa-miR-491-5p	NM_003565	ULK1	circRNA	chr12	132398333	132398354	+	5	0	AGO1-4,AGO2	7mer-m8	ggaguaccuucccaAGGGGUGa	ggaccccaucuccaUCCCCACc
MIMAT0002807	hsa-miR-491-5p	NM_003565	ULK1	circRNA	chr12	132398936	132398957	+	4	0	AGO1-4,AGO2	7mer-m8	ggaguaccuucccaAGGGGUGa	uguccccaucccagUCCCCACg
MIMAT0002807	hsa-miR-491-5p	NM_003565	ULK1	circRNA	chr12	132399907	132399928	+	1	0	AGO1-4	8mer	ggaguaCCUUCCCAAGGGGUGa	ggagcgGGACGCCCUCCCCACa
MIMAT0002807	hsa-miR-491-5p	NR_003290	EP400NL	circRNA	chr12	132589998	132590020	+	1	0	AGO2	8mer	ggaguaccuUCCCA-AGGGGUGa	aagucccucAGAGUCUCCCCACa
MIMAT0002807	hsa-miR-491-5p	NM_001170543	PGAM5	circRNA	chr12	133268284	133268305	+	1	0	AGO2	7mer-m8	ggaguaccuucccAAGGGGUGa	gacuucaguccccUUCCCCACu
MIMAT0002807	hsa-miR-491-5p	NM_005895	GOLGA3	circRNA	chr12	133346267	133346288	-	4	0	AGO1-4	8mer	ggaguaccuucccaAGGGGUGa	gggcggcguguucaUCCCCACa
MIMAT0002807	hsa-miR-491-5p	NM_005895	GOLGA3	circRNA	chr12	133346306	133346331	-	2	0	AGO1-4	7mer-m8	ggAGUAC-CUUCCCA---AGGGGUGa	caUUAUGUGGCGUGUUCAUCCCCACg
MIMAT0002807	hsa-miR-491-5p	NM_001161344	CHFR	circRNA	chr12	133446263	133446284	-	1	0	AGO1-4	8mer	ggaguaccuucccAAGGGGUGa	gacgucagaccucUUCCCCACa
MIMAT0002807	hsa-miR-491-5p	NM_003045	SLC7A1	circRNA	chr13	30087323	30087344	-	3	0	AGO1-4,AGO2	7mer-m8	ggaguaccuucccaAGGGGUGa	agacccgagcauccUCCCCACc
MIMAT0002807	hsa-miR-491-5p	NM_003045	SLC7A1	circRNA	chr13	30088121	30088142	-	11	0	AGO1-4,AGO2	7mer-m8	ggaguaccuuccCAAGGGGUGa	guguccccagcaGCUCCCCACc
MIMAT0002807	hsa-miR-491-5p	NM_003045	SLC7A1	circRNA	chr13	30088536	30088557	-	5	0	AGO1-4,AGO2	7mer-m8	ggaguaccuucccaAGGGGUGa	gaggcaccccacccUCCCCACc
MIMAT0002807	hsa-miR-491-5p	NM_014887	N4BP2L2	circRNA	chr13	33080537	33080558	-	1	0	AGO2	7mer-m8	ggaguaccuucccaAGGGGUGa	ggaugaauuauccaUCCCCACc
MIMAT0002807	hsa-miR-491-5p	NM_014832	TBC1D4	circRNA	chr13	75898391	75898412	-	1	0	AGO2	8mer	ggAGUACCUUCCCA-AGGGGUGa	auUCA-GGUAGACUGUCCCCACa
MIMAT0002807	hsa-miR-491-5p	NM_005358	LMO7	circRNA	chr13	76397966	76397987	+	1	2	AGO2	8mer	ggagUACCUUCCCAAGGGGUGa	gagaAGGGGAAAUCUCCCCACa
MIMAT0002807	hsa-miR-491-5p	NM_001242871	SLAIN1	circRNA	chr13	78335111	78335132	+	1	0	AGO1-4	8mer	ggaguaccuUCCCAAGGGGUGa	uuccaacacAGGAAUCCCCACa
MIMAT0002807	hsa-miR-491-5p	NM_001846	COL4A2	circRNA	chr13	111164955	111164975	+	4	0	AGO1-4,AGO2	8mer	ggAGUACCUUCCCAAGGGGUGa	ccUCA-GGCACCCGUCCCCACa
MIMAT0002807	hsa-miR-491-5p	NM_001846	COL4A2	circRNA	chr13	111165234	111165257	+	7	1	AGO1-4,AGO2	7mer-m8	ggaguaCCUUC-CCA-AGGGGUGa	agggucGGAGGUGCUGUCCCCACu
MIMAT0002807	hsa-miR-491-5p	NM_031314	HNRNPC	circRNA	chr14	21731921	21731942	-	6	0	AGO1-4,AGO2	7mer-m8	ggaguaccuucccAAGGGGUGa	uuuuuaaccucccUUCCCCACc
MIMAT0002807	hsa-miR-491-5p	NM_001170629	CHD8	circRNA	chr14	21860792	21860813	-	2	0	AGO1-4	8mer	ggaguaccuucccaAGGGGUGa	uggugacucuccagUCCCCACa
MIMAT0002807	hsa-miR-491-5p	NM_020920	CHD8	circRNA	chr14	21860792	21860813	-	2	0	AGO1-4	8mer	ggaguaccuucccaAGGGGUGa	uggugacucuccagUCCCCACa
MIMAT0002807	hsa-miR-491-5p	NM_005015	OXA1L	circRNA	chr14	23240100	23240118	+	6	0	AGO1,AGO1-4,AGO2	7mer-m8	ggaGUACCUUCCCAAGGGGUGa	aacCAUGCA---UUUCCCCACg
MIMAT0002807	hsa-miR-491-5p	NM_014045	LRP10	circRNA	chr14	23346975	23346996	+	2	0	AGO1-4	7mer-m8	ggaguaccuuccCAAGGGGUGa	ucaccaccaccuGCUCCCCACg
MIMAT0002807	hsa-miR-491-5p	NM_001077351	RBM23	circRNA	chr14	23388262	23388283	-	2	0	AGO1-4,AGO2	8mer	ggaguaccuucccaAGGGGUGa	uauccgagcuccacUCCCCACa
MIMAT0002807	hsa-miR-491-5p	NM_001039619	PRMT5	circRNA	chr14	23395420	23395441	-	2	0	AGO2	7mer-m8	ggaguaccuucccaAGGGGUGa	caaagcagccauucUCCCCACu
MIMAT0002807	hsa-miR-491-5p	NM_021944	C14orf93	circRNA	chr14	23458975	23458996	-	1	0	AGO2	8mer	ggaguaccuucccaAGGGGUGa	gagcuggugaccagUCCCCACa
MIMAT0002807	hsa-miR-491-5p	NM_014977	ACIN1	circRNA	chr14	23532178	23532199	-	2	0	AGO1-4,AGO2	7mer-m8	ggaguaccuucccaAGGGGUGa	cugcccaggugcccUCCCCACc
MIMAT0002807	hsa-miR-491-5p	NM_025081	NYNRIN	circRNA	chr14	24885043	24885064	+	1	0	AGO2	7mer-m8	ggaguaccuucccaAGGGGUGa	agcgcuuuggccagUCCCCACu
MIMAT0002807	hsa-miR-491-5p	NM_002408	MGAT2	circRNA	chr14	50066137	50066158	+	1	0	AGO1-4	7mer-m8	ggaguaccuucccaAGGGGUGa	uucgcuauuuuuccUCCCCACu
MIMAT0002807	hsa-miR-491-5p	NM_002408	MGAT2	circRNA	chr14	50089237	50089260	+	4	1	AGO1-4,AGO2	7mer-m8	ggaGUACCUUC--CCAAGGGGUGa	uacUGUGGUAGCCAUUUCCCCACc
MIMAT0002807	hsa-miR-491-5p	NM_004713	NEMF	circRNA	chr14	50129467	50129488	-	2	0	AGO1-4	7mer-m8	ggaguaccuucccaAGGGGUGa	ccuuucuuuucuucUCCCCACu
MIMAT0002807	hsa-miR-491-5p	NM_015589	SAMD4A	circRNA	chr14	55087109	55087130	+	1	0	AGO2	8mer	ggaguaccuucCCAAGGGGUGa	cuaggucaguaGGAUCCCCACa
MIMAT0002807	hsa-miR-491-5p	NM_015589	SAMD4A	circRNA	chr14	55128462	55128483	+	1	0	AGO1-4	7mer-m8	ggaguaccuucccaAGGGGUGa	uugccccaaacccaUCCCCACu
MIMAT0002807	hsa-miR-491-5p	NM_015589	SAMD4A	circRNA	chr14	55156294	55156315	+	1	0	AGO1-4	7mer-m8	ggaguaccuucccAAGGGGUGa	aucugugcucucaUUCCCCACg
MIMAT0002807	hsa-miR-491-5p	NM_001161577	SAMD4A	circRNA	chr14	55243211	55243232	+	3	0	AGO1-4,AGO2	8mer	ggaguaccuucccAAGGGGUGa	ugcccgugcacacUUCCCCACa
MIMAT0002807	hsa-miR-491-5p	NM_015589	SAMD4A	circRNA	chr14	55243211	55243232	+	3	0	AGO1-4,AGO2	8mer	ggaguaccuucccAAGGGGUGa	ugcccgugcacacUUCCCCACa
MIMAT0002807	hsa-miR-491-5p	hsa_circ_0000540	hsa_circ_001380	circRNA	chr14	55806680	55806701	+	1	0	AGO1-4	7mer-m8	ggAGUACCUUCCCAAGGGGUGa	auUUCUGAAGUAAUUCCCCACc
MIMAT0002807	hsa-miR-491-5p	hsa_circ_0000540	hsa_circ_001380	circRNA	chr14	55821655	55821676	+	1	0	AGO1-4	7mer-m8	ggaguaccuucccaAGGGGUGa	agcacccuagccucUCCCCACu
MIMAT0002807	hsa-miR-491-5p	NM_018229	MUDENG	circRNA	chr14	57746945	57746966	+	1	0	AGO1-4	7mer-m8	ggAGUACCUUCCCA-AGGGGUGa	caUCA-GCUUGAGUCUCCCCACc
MIMAT0002807	hsa-miR-491-5p	NM_018477	ACTR10	circRNA	chr14	58690501	58690514	+	5	0	AGO1-4,AGO2	7mer-m8	ggaguaccuucccaAGGGGUGa	#NAME?
MIMAT0002807	hsa-miR-491-5p	NM_005956	MTHFD1	circRNA	chr14	64924937	64924958	+	2	3	AGO2	7mer-m8	ggagUACCUUCCCAAGGGGUGa	cacaAUGCCUGGACUCCCCACc
MIMAT0002807	hsa-miR-491-5p	NM_020806	GPHN	circRNA	chr14	67389474	67389495	+	3	0	AGO1-4	7mer-m8	ggaguaccuucccAAGGGGUGa	uugaagauuugccUUCCCCACc
MIMAT0002807	hsa-miR-491-5p	NM_015346	ZFYVE26	circRNA	chr14	68260380	68260400	-	3	0	AGO1-4,AGO2	7mer-m8	ggaGUACCUUCCCAAGGGGUGa	cccCAU-GAUGUUCUCCCCACc
MIMAT0002807	hsa-miR-491-5p	NM_003861	DCAF5	circRNA	chr14	69529142	69529163	-	2	0	AGO2	8mer	ggaguaccuucccaAGGGGUGa	caaguccgauuuaaUCCCCACa
MIMAT0002807	hsa-miR-491-5p	NM_014734	KIAA0247	circRNA	chr14	70181554	70181572	+	4	0	AGO1-4,AGO2	8mer	ggaGUACCUUCCCAAGGGGUGa	cugUGUGGCAG---UCCCCACa
MIMAT0002807	hsa-miR-491-5p	NM_033141	MAP3K9	circRNA	chr14	71215698	71215721	-	1	0	AGO1-4	7mer-m8	ggaguACCUU--CCCAAGGGGUGa	acugcUGGAAUCCUGAUCCCCACu
MIMAT0002807	hsa-miR-491-5p	NM_014982	PCNX	circRNA	chr14	71572046	71572067	+	1	0	AGO1-4	8mer	ggaguaccuucccaAGGGGUGa	acaacugccaacaaUCCCCACa
MIMAT0002807	hsa-miR-491-5p	hsa_circ_0000552	hsa_circ_000594	circRNA	chr14	71895956	71895977	+	2	0	AGO1-4	7mer-m8	ggaguaccuucccaAGGGGUGa	gagugccuguuuccUCCCCACu
MIMAT0002807	hsa-miR-491-5p	hsa_circ_0006783	hsa_circ_0006783	circRNA	chr14	71895956	71895977	+	2	0	AGO1-4	7mer-m8	ggaguaccuucccaAGGGGUGa	gagugccuguuuccUCCCCACu
MIMAT0002807	hsa-miR-491-5p	hsa_circ_0000552	hsa_circ_000594	circRNA	chr14	71909377	71909398	+	1	0	AGO1-4	8mer	ggAGUACCUUCCCAAGGGGUGa	gcUCAUGCCUGUAAUCCCCACa
MIMAT0002807	hsa-miR-491-5p	hsa_circ_0006783	hsa_circ_0006783	circRNA	chr14	71909377	71909398	+	1	0	AGO1-4	8mer	ggAGUACCUUCCCAAGGGGUGa	gcUCAUGCCUGUAAUCCCCACa
MIMAT0002807	hsa-miR-491-5p	hsa_circ_0000552	hsa_circ_000594	circRNA	chr14	71928277	71928298	+	1	0	AGO1-4	8mer	ggaGUACCUUCCCAAGGGGUGa	gucCAUCCACAUCUUCCCCACa
MIMAT0002807	hsa-miR-491-5p	hsa_circ_0006783	hsa_circ_0006783	circRNA	chr14	71928277	71928298	+	1	0	AGO1-4	8mer	ggaGUACCUUCCCAAGGGGUGa	gucCAUCCACAUCUUCCCCACa
MIMAT0002807	hsa-miR-491-5p	NM_015556	SIPA1L1	circRNA	chr14	71971933	71971953	+	1	0	AGO1-4	7mer-m8	ggAGUACCUUCCCAAGGGGUGa	acUCACAG-AUACUUCCCCACc
MIMAT0002807	hsa-miR-491-5p	NM_015556	SIPA1L1	circRNA	chr14	71972684	71972705	+	3	0	AGO1-4	7mer-m8	ggaguaccuucccaAGGGGUGa	ccccaaaaaaaaaaUCCCCACg
MIMAT0002807	hsa-miR-491-5p	NM_152444	PTGR2	circRNA	chr14	74372435	74372456	+	1	0	AGO1-4	7mer-m8	ggaguaccuucccAAGGGGUGa	uguguaacuauucUUCCCCACu
MIMAT0002807	hsa-miR-491-5p	NM_005050	ABCD4	circRNA	chr14	74752557	74752578	-	1	0	AGO2	8mer	ggaguaccuucccaAGGGGUGa	ggguuuuucacuucUCCCCACa
MIMAT0002807	hsa-miR-491-5p	NM_012111	AHSA1	circRNA	chr14	77931917	77931938	+	3	0	AGO1-4,AGO2	7mer-m8	ggaguaccuucccaAGGGGUGa	uguuggagucaaaaUCCCCACu
MIMAT0002807	hsa-miR-491-5p	NM_020421	ADCK1	circRNA	chr14	78390850	78390872	+	1	0	AGO3	7mer-m8	ggAGUACCU-UCCCAAGGGGUGa	cuUCGUGCACUGCGAUCCCCACc
MIMAT0002807	hsa-miR-491-5p	NM_005197	FOXN3	circRNA	chr14	89626316	89626337	-	1	0	AGO1-4	8mer	ggAGUACCUUCCCAAGGGGUGa	acUAACUGGUGCAUUCCCCACa
MIMAT0002807	hsa-miR-491-5p	NM_001010854	TTC7B	circRNA	chr14	91007311	91007332	-	1	0	AGO1-4	7mer-m8	ggaguaccuucccaAGGGGUGa	caacuguccuuuucUCCCCACc
MIMAT0002807	hsa-miR-491-5p	NM_017437	CPSF2	circRNA	chr14	92629906	92629926	+	2	0	AGO1-4	7mer-m8	ggaguACCUUCCCAAGGGGUGa	caguuUGGCUGUG-UCCCCACc
MIMAT0002807	hsa-miR-491-5p	NM_001085	SERPINA3	circRNA	chr14	95080989	95081011	+	1	0	AGO1-4	7mer-m8	ggagUACCUUCCCA-AGGGGUGa	aagaAUGUCAUCUUCUCCCCACu
MIMAT0002807	hsa-miR-491-5p	NM_024734	CLMN	circRNA	chr14	95669513	95669534	-	2	0	AGO1-4,AGO2	7mer-m8	ggaguaccuucccAAGGGGUGa	aagguuuccgucaUUCCCCACg
MIMAT0002807	hsa-miR-491-5p	NM_024734	CLMN	circRNA	chr14	95669542	95669563	-	2	0	AGO1-4,AGO2	7mer-m8	ggaguaccUUCCCAAGGGGUGa	uggauuucAAGCCCUCCCCACc
MIMAT0002807	hsa-miR-491-5p	NM_018036	ATG2B	circRNA	chr14	96768396	96768414	-	3	0	AGO1-4	8mer	ggAGUACCUUCCCAAGGGGUGa	aaUC-UGGCAGG--UCCCCACa
MIMAT0002807	hsa-miR-491-5p	NM_001376	DYNC1H1	circRNA	chr14	102498748	102498775	+	11	1	AGO1-4,AGO2	7mer-m8	ggAGUACCUUCCC----A--AGGGGUGa	caUCAUGCGGGAGAACUUCAUCCCCACc
MIMAT0002807	hsa-miR-491-5p	NM_001128918	MARK3	circRNA	chr14	103852236	103852259	+	5	0	AGO1-4,AGO2	7mer-m8	ggagUACCUU--CCCAAGGGGUGa	gggaAGGGAGCCGCCCUCCCCACg
MIMAT0002807	hsa-miR-491-5p	NM_001100119	XRCC3	circRNA	chr14	104164886	104164907	-	3	0	AGO1-4,AGO2	7mer-m8	ggaguaccuuccCAAGGGGUGa	ugcuggguaccuGGUCCCCACu
MIMAT0002807	hsa-miR-491-5p	NM_015316	PPP1R13B	circRNA	chr14	104206266	104206287	-	2	0	AGO1-4,AGO2	7mer-m8	ggaGUACC-UUCCCAAGGGGUGa	caaCGUGGCCACGG-UCCCCACc
MIMAT0002807	hsa-miR-491-5p	NM_001112726	KIAA0284	circRNA	chr14	105349463	105349484	+	1	0	AGO1-4	7mer-m8	ggaguaccuuCCCAAGGGGUGa	cagcuacuucGAGAUCCCCACg
MIMAT0002807	hsa-miR-491-5p	NM_138420	AHNAK2	circRNA	chr14	105405264	105405285	-	2	0	AGO1-4,AGO2	7mer-m8	ggaguaccuUCCCAAGGGGUGa	gcgggaaucAGAGAUCCCCACg
MIMAT0002807	hsa-miR-491-5p	NM_138420	AHNAK2	circRNA	chr14	105405561	105405584	-	1	0	AGO2	7mer-m8	ggagUACCUUCCCA---AGGGGUGa	gaggAU-GAUGUGUUCAUCCCCACu
MIMAT0002807	hsa-miR-491-5p	NM_001242786	BRF1	circRNA	chr14	105688049	105688070	-	1	1	AGO1-4	7mer-m8	ggaguACCUUCCCAAGGGGUGa	ccugcUGGACCCCCUCCCCACu
MIMAT0002807	hsa-miR-491-5p	NM_001519	BRF1	circRNA	chr14	105688049	105688070	-	1	1	AGO1-4	7mer-m8	ggaguACCUUCCCAAGGGGUGa	ccugcUGGACCCCCUCCCCACu
MIMAT0002807	hsa-miR-491-5p	NM_001184889	NIPA2	circRNA	chr15	23005866	23005889	-	1	0	AGO1-4	7mer-m8	ggaGUACCUUCCCA--AGGGGUGa	aaaUGUGCAUUUGUCAUCCCCACu
MIMAT0002807	hsa-miR-491-5p	NM_144599	NIPA1	circRNA	chr15	23060856	23060878	-	1	0	AGO1-4	7mer-m8	ggaGUACCUUCC-CAAGGGGUGa	uggCUUACACGGCGGUCCCCACg
MIMAT0002807	hsa-miR-491-5p	NM_024490	ATP10A	circRNA	chr15	25925082	25925105	-	1	0	AGO1-4	8mer	ggaGUACCUUCCC--AAGGGGUGa	cucCAGGGGAGGGUUUUCCCCACa
MIMAT0002807	hsa-miR-491-5p	NM_000814	GABRB3	circRNA	chr15	27039514	27039535	-	1	0	AGO1-4	8mer	ggaguaccuucccAAGGGGUGa	ucaccagcccauuUUCCCCACa
MIMAT0002807	hsa-miR-491-5p	NM_015995	KLF13	circRNA	chr15	31668290	31668313	+	5	0	AGO2	7mer-m8	ggAGUAC-CUUCCCA-AGGGGUGa	ccUCAAGUGUUCUGUCUCCCCACc
MIMAT0002807	hsa-miR-491-5p	NM_001130010	C15orf41	circRNA	chr15	37100600	37100621	+	1	0	AGO2	7mer-m8	ggAGUACCUUCCCAAGGGGUGa	gcUCAAAGCCUGUUUCCCCACg
MIMAT0002807	hsa-miR-491-5p	NM_003246	THBS1	circRNA	chr15	39888225	39888246	+	22	1	AGO1-4,AGO2	7mer-m8	ggaguaccuuccCAAGGGGUGa	gacuuccucccuGAUCCCCACc
MIMAT0002807	hsa-miR-491-5p	NM_014952	BAHD1	circRNA	chr15	40751099	40751120	+	2	0	AGO1-4	7mer-m8	ggAGUACCUUCCCAAGGGGUGa	agUCGAGCAGGGGAUCCCCACc
MIMAT0002807	hsa-miR-491-5p	NM_014952	BAHD1	circRNA	chr15	40751689	40751710	+	2	0	AGO1-4	8mer	ggaguaccuucccAAGGGGUGa	gcaucagcccucuUUCCCCACa
MIMAT0002807	hsa-miR-491-5p	NM_016359	NUSAP1	circRNA	chr15	41672447	41672468	+	6	1	AGO1,AGO1-4,AGO2	7mer-m8	ggaguaccuucccaAGGGGUGa	uuuuuuugcugucaUCCCCACu
MIMAT0002807	hsa-miR-491-5p	NM_002220	ITPKA	circRNA	chr15	41795405	41795427	+	1	0	AGO2	7mer-m8	ggaGUACCUUCCCA-AGGGGUGa	ggaCCUGCAGCUUUGUCCCCACu
MIMAT0002807	hsa-miR-491-5p	NM_001164273	MGA	circRNA	chr15	42019454	42019475	+	6	0	AGO1-4,AGO2	7mer-m8	ggaguaccuucccaAGGGGUGa	agaaccaguuuauaUCCCCACg
MIMAT0002807	hsa-miR-491-5p	NM_016642	SPTBN5	circRNA	chr15	42147051	42147074	-	1	0	AGO2	8mer	ggaGUACCUUC-CCA-AGGGGUGa	gugCACCCAGGCGCUAUCCCCACa
MIMAT0002807	hsa-miR-491-5p	NM_022473	ZFP106	circRNA	chr15	42743040	42743058	-	4	0	AGO1-4,AGO2	7mer-m8	ggAGUACCUUCCCAAGGGGUGa	caUCAUUGAA---AUCCCCACu
MIMAT0002807	hsa-miR-491-5p	NM_020759	STARD9	circRNA	chr15	42985701	42985724	+	1	0	AGO2	8mer	ggAGUACCUU--CCCAAGGGGUGa	cuUCCUUGAGUUGCACUCCCCACa
MIMAT0002807	hsa-miR-491-5p	NM_002373	MAP1A	circRNA	chr15	43819058	43819079	+	1	0	AGO1-4	7mer-m8	ggaguaccuucCCAAGGGGUGa	ucuccccuccaGCUUCCCCACc
MIMAT0002807	hsa-miR-491-5p	NM_002373	MAP1A	circRNA	chr15	43823716	43823737	+	1	1	AGO1-4	7mer-m8	ggaguaccuucccaAGGGGUGa	cuguguucugcuccUCCCCACg
MIMAT0002807	hsa-miR-491-5p	NM_020990	CKMT1B	circRNA	chr15	43891426	43891447	+	1	0	AGO1-4	8mer	ggaguaccuucccaAGGGGUGa	ccaggauauccgcaUCCCCACa
MIMAT0002807	hsa-miR-491-5p	NM_005313	PDIA3	circRNA	chr15	44038703	44038724	+	9	0	AGO1-4	7mer-m8	ggaguaccuucccaAGGGGUGa	gacccuuccggccgUCCCCACc
MIMAT0002807	hsa-miR-491-5p	NM_000138	FBN1	circRNA	chr15	48719845	48719866	-	10	0	AGO1-4,AGO2	7mer-m8	ggaguaCCUUCCCAAGGGGUGa	gggagaGGCUGGGGUCCCCACu
MIMAT0002807	hsa-miR-491-5p	NM_020234	DTWD1	circRNA	chr15	49921172	49921193	+	1	0	AGO1-4	7mer-m8	ggaguaccuuccCAAGGGGUGa	aucccuccccuaGCUCCCCACc
MIMAT0002807	hsa-miR-491-5p	NM_017672	TRPM7	circRNA	chr15	50884239	50884260	-	3	0	AGO1-4	7mer-m8	ggaguaccuucccaAGGGGUGa	uaccacaucugucaUCCCCACc
MIMAT0002807	hsa-miR-491-5p	NM_014547	TMOD3	circRNA	chr15	52201777	52201798	+	3	0	AGO1-4	7mer-m8	ggaguaccuucccaAGGGGUGa	uuucaccaccucccUCCCCACc
MIMAT0002807	hsa-miR-491-5p	NM_006628	ARPP19	circRNA	chr15	52839882	52839903	-	10	2	AGO1,AGO1-4,AGO2	7mer-m8	ggaguaccuucccAAGGGGUGa	ugucuccucucaaUUCCCCACc
MIMAT0002807	hsa-miR-491-5p	NM_017610	RNF111	circRNA	chr15	59359145	59359166	+	1	0	AGO1-4	7mer-m8	ggaguaccuucccaAGGGGUGa	caccaccaccauacUCCCCACc
MIMAT0002807	hsa-miR-491-5p	NM_004701	CCNB2	circRNA	chr15	59417039	59417060	+	3	0	AGO1-4,AGO2	7mer-m8	ggaguaccuucccaAGGGGUGa	ucaaagaccuugccUCCCCACu
MIMAT0002807	hsa-miR-491-5p	NM_004492	GTF2A2	circRNA	chr15	59949606	59949629	-	1	0	AGO2	8mer	ggagUACCUUCCC--AAGGGGUGa	gcggAGGGAAGCGCCUUCCCCACa
MIMAT0002807	hsa-miR-491-5p	NM_022048	CSNK1G1	circRNA	chr15	64460878	64460897	-	2	0	AGO1-4	7mer-m8	ggAGUACCUUCCCAAGGGGUGa	acUCGCUGACUG--UCCCCACc
MIMAT0002807	hsa-miR-491-5p	NM_022048	CSNK1G1	circRNA	chr15	64461912	64461933	-	3	0	AGO1-4	8mer	ggaguaccuucccAAGGGGUGa	aauaucacaccccUUCCCCACa
MIMAT0002807	hsa-miR-491-5p	NM_015042	ZNF609	circRNA	chr15	64966532	64966551	+	2	0	AGO2	7mer-m8	ggAGUACCUUCCCAAGGGGUGa	ccUAAUUGACUG--UCCCCACc
MIMAT0002807	hsa-miR-491-5p	NM_015042	ZNF609	circRNA	chr15	64970542	64970565	+	2	0	AGO1,AGO1-4	7mer-m8	ggaGUACCUUCCCA--AGGGGUGa	ccaUGUGCCUGUGUCCUCCCCACu
MIMAT0002807	hsa-miR-491-5p	NM_002537	OAZ2	circRNA	chr15	64979981	64980002	-	2	1	AGO1-4,AGO2	7mer-m8	ggaguaccuucccaAGGGGUGa	uaguacuagcugccUCCCCACc
MIMAT0002807	hsa-miR-491-5p	NM_002755	MAP2K1	circRNA	chr15	66709433	66709454	+	1	0	AGO1-4	7mer-m8	ggaguaccuucccAAGGGGUGa	cccaaagacuuauUUCCCCACc
MIMAT0002807	hsa-miR-491-5p	hsa_circ_0036002	hsa_circ_0036002	circRNA	chr15	66952334	66952355	+	1	0	AGO1-4	7mer-m8	ggaguaccuucccAAGGGGUGa	ucccuuuccuuucUUCCCCACc
MIMAT0002807	hsa-miR-491-5p	NM_005902	SMAD3	circRNA	chr15	67485761	67485782	+	2	0	AGO1-4	7mer-m8	ggaguaccuucccaAGGGGUGa	uuuccucucuccccUCCCCACc
MIMAT0002807	hsa-miR-491-5p	NM_001104554	PAQR5	circRNA	chr15	69698568	69698593	+	1	0	AGO1-4	7mer-m8	ggAGUACCUUCC---CA-AGGGGUGa	ccUAAUGGGAUGUACCUCUCCCCACu
MIMAT0002807	hsa-miR-491-5p	NM_024817	THSD4	circRNA	chr15	72074709	72074730	+	3	0	AGO1-4,AGO2	7mer-m8	ggaGUACCUUCCCAAGGGGUGa	cugCCUUGACCCCUUCCCCACg
MIMAT0002807	hsa-miR-491-5p	NM_001206796	PKM2	circRNA	chr15	72491496	72491517	-	24	3	AGO1,AGO1-4,AGO2	7mer-m8	ggaguaccuucccaAGGGGUGa	ccaguuugcaccugUCCCCACc
MIMAT0002807	hsa-miR-491-5p	NM_001206797	PKM2	circRNA	chr15	72491496	72491517	-	24	3	AGO1,AGO1-4,AGO2	7mer-m8	ggaguaccuucccaAGGGGUGa	ccaguuugcaccugUCCCCACc
MIMAT0002807	hsa-miR-491-5p	NM_001206798	PKM2	circRNA	chr15	72491496	72491517	-	24	3	AGO1,AGO1-4,AGO2	7mer-m8	ggaguaccuucccaAGGGGUGa	ccaguuugcaccugUCCCCACc
MIMAT0002807	hsa-miR-491-5p	NM_001206796	PKM2	circRNA	chr15	72523420	72523441	-	6	0	AGO1-4	7mer-m8	ggaguaccuucccaAGGGGUGa	ggcuacgccaucagUCCCCACc
MIMAT0002807	hsa-miR-491-5p	NR_023318	ADPGK	circRNA	chr15	73047966	73047987	-	1	0	AGO1-4	7mer-m8	ggaguaccuucccaAGGGGUGa	cuccauuucugacaUCCCCACu
MIMAT0002807	hsa-miR-491-5p	NM_006465	ARID3B	circRNA	chr15	74888848	74888869	+	1	0	AGO1	7mer-m8	ggaguaccuuccCAAGGGGUGa	gccaaaccucauGCUCCCCACu
MIMAT0002807	hsa-miR-491-5p	NM_006465	ARID3B	circRNA	chr15	74889001	74889022	+	3	0	AGO1-4,AGO2	8mer	ggaguaccuucccaAGGGGUGa	ucuuggccucaccaUCCCCACa
MIMAT0002807	hsa-miR-491-5p	NM_001099436	ULK3	circRNA	chr15	75129073	75129095	-	2	0	AGO1-4,AGO2	8mer	ggAGUACCU-UCCCAAGGGGUGa	ccUCAGGGACCACCCUCCCCACa
MIMAT0002807	hsa-miR-491-5p	NM_001099436	ULK3	circRNA	chr15	75134644	75134665	-	9	1	AGO1,AGO1-4,AGO2	8mer	ggaguaccuucccaAGGGGUGa	aagggcauucgacaUCCCCACa
MIMAT0002807	hsa-miR-491-5p	NM_021823	PPCDC	circRNA	chr15	75341779	75341800	+	1	1	AGO2	7mer-m8	ggaGUACCUUCCCAAGGGGUGa	cugCCUAGAGCCCCUCCCCACc
MIMAT0002807	hsa-miR-491-5p	NM_001145358	SIN3A	circRNA	chr15	75704014	75704035	-	7	0	AGO1-4,AGO2	7mer-m8	ggaGUACCUUCCCAAGGGGUGa	uucCACCGUAUGCAUCCCCACg
MIMAT0002807	hsa-miR-491-5p	hsa_circ_0000636	hsa_circ_000857	circRNA	chr15	75704014	75704035	-	7	0	AGO1-4,AGO2	7mer-m8	ggaGUACCUUCCCAAGGGGUGa	uucCACCGUAUGCAUCCCCACg
MIMAT0002807	hsa-miR-491-5p	NM_002833	PTPN9	circRNA	chr15	75815523	75815544	-	3	0	AGO1-4,AGO2	8mer	ggaguaccuucccaAGGGGUGa	gccagguugcaucaUCCCCACa
MIMAT0002807	hsa-miR-491-5p	NM_153271	SNX33	circRNA	chr15	75942105	75942128	+	1	0	AGO1-4	7mer-m8	ggagUACCUUCC--CAAGGGGUGa	cccaGUGGAAGGCCAAUCCCCACc
MIMAT0002807	hsa-miR-491-5p	NM_153271	SNX33	circRNA	chr15	75942520	75942541	+	1	0	AGO1-4	7mer-m8	ggaguaccuuccCAAGGGGUGa	gcucaccuuccaGAUCCCCACc
MIMAT0002807	hsa-miR-491-5p	NM_153271	SNX33	circRNA	chr15	75949722	75949742	+	2	0	AGO1-4,AGO2	7mer-m8	ggaGUACCUUCCCAAGGGGUGa	gccCCUGGGA-AAUUCCCCACu
MIMAT0002807	hsa-miR-491-5p	NM_153271	SNX33	circRNA	chr15	75950555	75950575	+	1	0	AGO2	8mer	ggaGUACCUUCCCAAGGGGUGa	cacCA-GCAAUAACUCCCCACa
MIMAT0002807	hsa-miR-491-5p	NM_153271	SNX33	circRNA	chr15	75950807	75950828	+	1	0	AGO1-4	7mer-m8	ggaguaccuucccaAGGGGUGa	ggguuucugccuccUCCCCACc
MIMAT0002807	hsa-miR-491-5p	NM_024776	PEAK1	circRNA	chr15	77401276	77401297	-	2	1	AGO1-4,AGO2	7mer-m8	ggaguACCUUCCCAAGGGGUGa	acugcUAGAAGCUUUCCCCACc
MIMAT0002807	hsa-miR-491-5p	NM_024776	PEAK1	circRNA	chr15	77405793	77405814	-	1	1	AGO1-4	7mer-m8	ggaguaccuucccaAGGGGUGa	gauucuccacucugUCCCCACu
MIMAT0002807	hsa-miR-491-5p	NM_024776	PEAK1	circRNA	chr15	77472904	77472925	-	5	0	AGO1-4,AGO2	8mer	ggaguaccuucccaAGGGGUGa	aaccauaaaccuugUCCCCACa
MIMAT0002807	hsa-miR-491-5p	NM_144572	TBC1D2B	circRNA	chr15	78305439	78305460	-	1	0	AGO1-4	7mer-m8	ggaGUACCUUCCCAAGGGGUGa	aucCGUGCGGGCAUUCCCCACg
MIMAT0002807	hsa-miR-491-5p	NM_014862	ARNT2	circRNA	chr15	80762619	80762640	+	3	0	AGO1-4	8mer	ggAGUACCU-UCCCAAGGGGUGa	gcUCUCCGACAUGG-UCCCCACa
MIMAT0002807	hsa-miR-491-5p	NM_021214	FAM108C1	circRNA	chr15	81041893	81041914	+	1	0	AGO2	7mer-m8	ggaGU-ACCUUCCCAAGGGGUGa	gagCAUUGGGACUG-UCCCCACg
MIMAT0002807	hsa-miR-491-5p	NM_014630	ZNF592	circRNA	chr15	85326201	85326222	+	3	0	AGO1-4	8mer	ggaguaccuuccCAAGGGGUGa	gaucugccuccaGAUCCCCACa
MIMAT0002807	hsa-miR-491-5p	NM_014630	ZNF592	circRNA	chr15	85326994	85327015	+	1	0	AGO1-4	7mer-m8	ggaguaccuuccCAAGGGGUGa	cuguggcugccaGCUCCCCACc
MIMAT0002807	hsa-miR-491-5p	NM_006738	AKAP13	circRNA	chr15	86078356	86078377	+	3	0	AGO1-4	8mer	ggaguaccuucccaAGGGGUGa	accacaagucacucUCCCCACa
MIMAT0002807	hsa-miR-491-5p	NM_006738	AKAP13	circRNA	chr15	86124868	86124890	+	1	0	AGO2	8mer	ggaguaccUUCC-CAAGGGGUGa	cuguugccAAGGAGCUCCCCACa
MIMAT0002807	hsa-miR-491-5p	NM_022767	AEN	circRNA	chr15	89173841	89173862	+	3	0	AGO1-4,AGO2	7mer-m8	ggAGUACCUUCCCAAGGGGUGa	ggUUGCCGUGGCCUUCCCCACc
MIMAT0002807	hsa-miR-491-5p	NM_022767	AEN	circRNA	chr15	89174077	89174098	+	1	0	AGO2	7mer-m8	ggaguaccuucccAAGGGGUGa	aaggaggcauuucUUCCCCACc
MIMAT0002807	hsa-miR-491-5p	NM_152259	C15orf42	circRNA	chr15	90128974	90128997	+	3	0	AGO1-4,AGO2	7mer-m8	ggAGU-ACCUU-CCCAAGGGGUGa	caUCACUGGAGUUAUUUCCCCACu
MIMAT0002807	hsa-miR-491-5p	NM_152259	C15orf42	circRNA	chr15	90167431	90167455	+	6	0	AGO1-4,AGO2	7mer-m8	ggAGU--AC-CUUCCCAAGGGGUGa	auUCAACUGUGACUUCUUCCCCACc
MIMAT0002807	hsa-miR-491-5p	NM_001150	ANPEP	circRNA	chr15	90344806	90344827	-	3	0	AGO1-4	7mer-m8	ggaguaccuucccaAGGGGUGa	ccgguccauccaacUCCCCACc
MIMAT0002807	hsa-miR-491-5p	NM_001150	ANPEP	circRNA	chr15	90349821	90349842	-	3	0	AGO1-4	7mer-m8	ggaGUACCUUCCCAAGGGGUGa	cucCCUGAGCCGCCUCCCCACc
MIMAT0002807	hsa-miR-491-5p	NM_013272	SLCO3A1	circRNA	chr15	92435479	92435500	+	1	0	AGO2	7mer-m8	ggaguaccuucccaAGGGGUGa	ugaggcccacucugUCCCCACu
MIMAT0002807	hsa-miR-491-5p	NR_037601	LOC100507217	circRNA	chr15	93465620	93465641	+	1	0	AGO1-4	7mer-m8	ggaguaccuucccAAGGGGUGa	guuuuucucaucuUUCCCCACu
MIMAT0002807	hsa-miR-491-5p	NR_037601	LOC100507217	circRNA	chr15	93471822	93471842	+	1	0	AGO1-4	7mer-m8	ggaguacCUUCCCAAGGGGUGa	guauccaGUAUGG-UCCCCACu
MIMAT0002807	hsa-miR-491-5p	NM_198243	ASB7	circRNA	chr15	101149945	101149967	+	1	0	AGO1-4	7mer-m8	ggaGUACCUUC-CCAAGGGGUGa	guaCUUUGAAGCCCCUCCCCACg
MIMAT0002807	hsa-miR-491-5p	NM_001243249	NPRL3	circRNA	chr16	136644	136666	-	1	0	AGO1-4	7mer-m8	ggaguaccuuCCCA-AGGGGUGa	gugggcgcucGCGUCUCCCCACc
MIMAT0002807	hsa-miR-491-5p	NM_000558	HBA1	circRNA	chr16	226928	226949	+	1	1	AGO1-4	7mer-m8	ggaguaccuucccAAGGGGUGa	gauguuccuguccUUCCCCACc
MIMAT0002807	hsa-miR-491-5p	NM_032039	ITFG3	circRNA	chr16	315232	315253	+	1	0	AGO2	8mer	ggaguaccuucccaAGGGGUGa	gcauccucccugagUCCCCACa
MIMAT0002807	hsa-miR-491-5p	NM_001172663	RAB40C	circRNA	chr16	678281	678302	+	1	0	AGO1-4	7mer-m8	ggaguaccuucccaAGGGGUGa	gcuccccaaaucccUCCCCACg
MIMAT0002807	hsa-miR-491-5p	NM_001172663	RAB40C	circRNA	chr16	678483	678504	+	1	0	AGO1-4	8mer	ggaguaccuuCCCAAGGGGUGa	cgcuggcccuGGGGUCCCCACa
MIMAT0002807	hsa-miR-491-5p	NM_001172663	RAB40C	circRNA	chr16	679255	679273	+	2	0	AGO1-4	7mer-m8	ggAGUACCUUCCCAAGGGGUGa	auUCA--GCUGUGGUCCCCAC-
MIMAT0002807	hsa-miR-491-5p	NM_001005920	JMJD8	circRNA	chr16	731702	731723	-	6	0	AGO1,AGO1-4,AGO2	8mer	ggaguaccuucccAAGGGGUGa	cuaacauccacacUUCCCCACa
MIMAT0002807	hsa-miR-491-5p	NM_001005920	JMJD8	circRNA	chr16	733372	733393	-	1	1	AGO1-4	7mer-m8	ggaguaccuucccaAGGGGUGa	ucuuucggcacuacUCCCCACc
MIMAT0002807	hsa-miR-491-5p	NM_023933	FAM173A	circRNA	chr16	772368	772389	+	4	0	AGO1-4,AGO2	7mer-m8	ggaguaccuucccaAGGGGUGa	ugggcgcuucccacUCCCCACc
MIMAT0002807	hsa-miR-491-5p	NM_058192	RPUSD1	circRNA	chr16	836238	836259	-	2	0	AGO1-4,AGO2	7mer-m8	ggaguaccuucccaAGGGGUGa	uuucuaccugcgcaUCCCCACg
MIMAT0002807	hsa-miR-491-5p	NM_021098	CACNA1H	circRNA	chr16	1260108	1260129	+	1	0	AGO1-4	8mer	ggaguaccuucccaAGGGGUGa	cccucuaccucuucUCCCCACa
MIMAT0002807	hsa-miR-491-5p	NM_020825	CRAMP1L	circRNA	chr16	1716572	1716595	+	4	0	AGO1-4	7mer-m8	ggagUACCUU--CCCAAGGGGUGa	caggAUGGAGACACCCUCCCCACc
MIMAT0002807	hsa-miR-491-5p	NM_020825	CRAMP1L	circRNA	chr16	1724173	1724195	+	1	0	AGO1-4	7mer-m8	ggAGUACCUU-CCCAAGGGGUGa	ggUCACAGAGCUGCUUCCCCACg
MIMAT0002807	hsa-miR-491-5p	NM_020825	CRAMP1L	circRNA	chr16	1725437	1725458	+	1	0	AGO1-4	7mer-m8	ggaguaccuucccaAGGGGUGa	ccuacucucccuccUCCCCACc
MIMAT0002807	hsa-miR-491-5p	NM_001761	CCNF	circRNA	chr16	2499283	2499291	+	1	0	AGO1-4	7mer-m8	ggaguaccuucccaAGGGGUGa	#NAME?
MIMAT0002807	hsa-miR-491-5p	NM_001199107	TBC1D24	circRNA	chr16	2552465	2552486	+	3	0	AGO1-4,AGO2	8mer	ggaguaccuucccaAGGGGUGa	cgugccacuuuccaUCCCCACa
MIMAT0002807	hsa-miR-491-5p	NM_001199107	TBC1D24	circRNA	chr16	2564076	2564097	+	6	0	AGO1-4,AGO2	7mer-m8	ggaguaccuucccaAGGGGUGa	cagagcuugcccccUCCCCACc
MIMAT0002807	hsa-miR-491-5p	NM_016333	SRRM2	circRNA	chr16	2811646	2811665	+	7	0	AGO1-4,AGO2	8mer	ggaGUACCUUCCCAAGGGGUGa	cgaCAUGG--CGGCUCCCCACa
MIMAT0002807	hsa-miR-491-5p	NM_016333	SRRM2	circRNA	chr16	2814473	2814494	+	7	0	AGO1,AGO1-4	7mer-m8	ggaguaccuucccaAGGGGUGa	aagaacugucuaacUCCCCACu
MIMAT0002807	hsa-miR-491-5p	NM_138439	FLYWCH2	circRNA	chr16	2945264	2945285	+	3	0	AGO1-4	7mer-m8	ggaguaccuucccaAGGGGUGa	ucuccacaucgcugUCCCCACc
MIMAT0002807	hsa-miR-491-5p	NM_017885	HCFC1R1	circRNA	chr16	3072821	3072842	-	2	1	AGO2	8mer	ggaguaccuucccAAGGGGUGa	cccaccuuccuucUUCCCCACa
MIMAT0002807	hsa-miR-491-5p	NM_016292	TRAP1	circRNA	chr16	3727949	3727970	-	1	0	AGO1-4	7mer-m8	ggaguaccuucccAAGGGGUGa	uucaagcugcucuUUCCCCACc
MIMAT0002807	hsa-miR-491-5p	NM_014153	ZC3H7A	circRNA	chr16	11855289	11855310	-	1	0	AGO1-4	8mer	ggaguaccuucccaAGGGGUGa	gaacauccguccucUCCCCACa
MIMAT0002807	hsa-miR-491-5p	NM_014048	MKL2	circRNA	chr16	14328077	14328098	+	3	0	AGO1-4,AGO2	8mer	ggaguaccuucccaAGGGGUGa	ugcagcuccuguccUCCCCACa
MIMAT0002807	hsa-miR-491-5p	NM_018427	RRN3	circRNA	chr16	15155632	15155656	-	7	0	AGO1,AGO1-4,AGO2,AGO3	7mer-m8	ggAGUACCUU---CCCAAGGGGUGa	cuUCAAGUAGUGUGGGCUCCCCACc
MIMAT0002807	hsa-miR-491-5p	hsa_circ_0038032	hsa_circ_0038032	circRNA	chr16	15218033	15218051	-	2	0	AGO1-4	7mer-m8	ggaGUACCUUCCCAAGGGGUGa	cugCUUGGA---GCUCCCCACc
MIMAT0002807	hsa-miR-491-5p	NM_001128423	MPV17L	circRNA	chr16	15503350	15503371	+	1	0	AGO1-4	7mer-m8	ggaguaccuucccaAGGGGUGa	guucuuuuuaauucUCCCCACc
MIMAT0002807	hsa-miR-491-5p	NM_004996	ABCC1	circRNA	chr16	15503350	15503371	+	1	0	AGO1-4	7mer-m8	ggaguaccuucccaAGGGGUGa	guucuuuuuaauucUCCCCACc
MIMAT0002807	hsa-miR-491-5p	NM_014287	NOMO1	circRNA	chr16	15503350	15503371	+	1	0	AGO1-4	7mer-m8	ggaguaccuucccaAGGGGUGa	guucuuuuuaauucUCCCCACc
MIMAT0002807	hsa-miR-491-5p	NM_004996	ABCC1	circRNA	chr16	15780118	15780139	+	1	0	AGO1-4	7mer-m8	ggaguaccuucccAAGGGGUGa	uucuugccaccccUUCCCCACc
MIMAT0002807	hsa-miR-491-5p	NM_014287	NOMO1	circRNA	chr16	15780118	15780139	+	1	0	AGO1-4	7mer-m8	ggaguaccuucccAAGGGGUGa	uucuugccaccccUUCCCCACc
MIMAT0002807	hsa-miR-491-5p	NM_014287	NOMO1	circRNA	chr16	16174315	16174336	+	1	0	AGO1-4	7mer-m8	ggaguaccuucccaAGGGGUGa	uccuuuacaaauaaUCCCCACu
MIMAT0002807	hsa-miR-491-5p	NM_004996	ABCC1	circRNA	chr16	16235911	16235932	+	4	0	AGO1,AGO1-4	7mer-m8	ggaguaccuucccaAGGGGUGa	accuggggcuucccUCCCCACc
MIMAT0002807	hsa-miR-491-5p	NM_014287	NOMO1	circRNA	chr16	16235911	16235932	+	4	0	AGO1,AGO1-4	7mer-m8	ggaguaccuucccaAGGGGUGa	accuggggcuucccUCCCCACc
MIMAT0002807	hsa-miR-491-5p	NM_015092	SMG1	circRNA	chr16	18820229	18820250	-	11	0	AGO1-4,AGO2	7mer-m8	ggaguaccuucccaAGGGGUGa	ucguucccuacuccUCCCCACc
MIMAT0002807	hsa-miR-491-5p	NM_015092	SMG1	circRNA	chr16	18860601	18860624	-	3	0	AGO1-4,AGO2	8mer	ggaGUACC--UUCCCAAGGGGUGa	ccgUGUGGCUCAAGAUUCCCCACa
MIMAT0002807	hsa-miR-491-5p	NR_002594	SLC7A5P2	circRNA	chr16	21530954	21530975	-	2	0	AGO1-4	8mer	ggaguaccuucccaAGGGGUGa	uucuuuuacacuucUCCCCACa
MIMAT0002807	hsa-miR-491-5p	NR_027155	LOC100271836	circRNA	chr16	21530954	21530975	-	2	0	AGO1-4	8mer	ggaguaccuucccaAGGGGUGa	uucuuuuacacuucUCCCCACa
MIMAT0002807	hsa-miR-491-5p	NR_002594	SLC7A5P2	circRNA	chr16	21531198	21531219	-	2	0	AGO1-4,AGO2	7mer-m8	ggAGUACCUUCCCAAGGGGUGa	gcUCAAGCCGCUCUUCCCCACc
MIMAT0002807	hsa-miR-491-5p	NR_027155	LOC100271836	circRNA	chr16	21531198	21531219	-	2	0	AGO1-4,AGO2	7mer-m8	ggAGUACCUUCCCAAGGGGUGa	gcUCAAGCCGCUCUUCCCCACc
MIMAT0002807	hsa-miR-491-5p	NR_002594	SLC7A5P2	circRNA	chr16	21806606	21806631	-	1	0	AGO1-4	7mer-m8	ggAGUACCUUCC----CAAGGGGUGa	agUCAUGGAGGGACACGUUCCCCACu
MIMAT0002807	hsa-miR-491-5p	NR_027155	LOC100271836	circRNA	chr16	21806606	21806631	-	1	0	AGO1-4	7mer-m8	ggAGUACCUUCC----CAAGGGGUGa	agUCAUGGAGGGACACGUUCCCCACu
MIMAT0002807	hsa-miR-491-5p	NR_002594	SLC7A5P2	circRNA	chr16	21889490	21889510	-	1	0	AGO1-4	7mer-m8	ggaGUACCUUCCCAAGGGGUGa	uuaUAUGG-GGAUUUCCCCACu
MIMAT0002807	hsa-miR-491-5p	NR_027155	LOC100271836	circRNA	chr16	21889490	21889510	-	1	0	AGO1-4	7mer-m8	ggaGUACCUUCCCAAGGGGUGa	uuaUAUGG-GGAUUUCCCCACu
MIMAT0002807	hsa-miR-491-5p	hsa_circ_0038447	hsa_circ_0038447	circRNA	chr16	21889490	21889510	-	1	0	AGO1-4	7mer-m8	ggaGUACCUUCCCAAGGGGUGa	uuaUAUGG-GGAUUUCCCCACu
MIMAT0002807	hsa-miR-491-5p	hsa_circ_0038448	hsa_circ_0038448	circRNA	chr16	21889490	21889510	-	1	0	AGO1-4	7mer-m8	ggaGUACCUUCCCAAGGGGUGa	uuaUAUGG-GGAUUUCCCCACu
MIMAT0002807	hsa-miR-491-5p	NM_020718	USP31	circRNA	chr16	23116768	23116792	-	2	0	AGO1-4	7mer-m8	ggaGUACCU---UCCCAAGGGGUGa	gucUAUGGAAACAAAGAUCCCCACu
MIMAT0002807	hsa-miR-491-5p	NM_001083614	EARS2	circRNA	chr16	23546486	23546507	-	1	0	AGO2	8mer	ggaguacCUUCCCAAGGGGUGa	gaagagcGACGGCUUCCCCACa
MIMAT0002807	hsa-miR-491-5p	NR_003501	EARS2	circRNA	chr16	23546486	23546507	-	1	0	AGO2	8mer	ggaguacCUUCCCAAGGGGUGa	gaagagcGACGGCUUCCCCACa
MIMAT0002807	hsa-miR-491-5p	NM_014494	TNRC6A	circRNA	chr16	24837021	24837042	+	25	1	AGO1-4,AGO2	7mer-m8	ggaguaccuucccAAGGGGUGa	cugugacuucaucUUCCCCACc
MIMAT0002807	hsa-miR-491-5p	NM_001012981	ZKSCAN2	circRNA	chr16	25268485	25268506	-	1	0	AGO1-4	7mer-m8	ggaguaccuucCCAAGGGGUGa	gagucuucuuuGGGUCCCCACc
MIMAT0002807	hsa-miR-491-5p	NM_015171	XPO6	circRNA	chr16	28198830	28198851	-	1	0	AGO1-4	7mer-m8	ggaguaccuucccaAGGGGUGa	agguacuuuuacugUCCCCACu
MIMAT0002807	hsa-miR-491-5p	NM_015171	XPO6	circRNA	chr16	28216243	28216265	-	2	0	AGO1-4	7mer-m8	ggAGUACCUUC-CCAAGGGGUGa	gaUUAUAGAUGUGAGUCCCCACg
MIMAT0002807	hsa-miR-491-5p	NM_000086	CLN3	circRNA	chr16	28499033	28499057	-	1	0	AGO2	8mer	ggAGUACCUUC-CCA--AGGGGUGa	gcUCCUGGCGGACAUCCUCCCCACa
MIMAT0002807	hsa-miR-491-5p	NM_001042432	CLN3	circRNA	chr16	28499033	28499057	-	1	0	AGO2	8mer	ggAGUACCUUC-CCA--AGGGGUGa	gcUCCUGGCGGACAUCCUCCCCACa
MIMAT0002807	hsa-miR-491-5p	NM_032815	NFATC2IP	circRNA	chr16	28969790	28969811	+	1	0	AGO1-4	7mer-m8	ggaguaccuucccaAGGGGUGa	ccaguuugcugcaaUCCCCACc
MIMAT0002807	hsa-miR-491-5p	NM_001031827	BOLA2	circRNA	chr16	29819181	29819202	-	1	0	AGO2	7mer-m8	ggaguaccuucccaAGGGGUGa	gucgcgucccucccUCCCCACg
MIMAT0002807	hsa-miR-491-5p	NR_002453	LOC595101	circRNA	chr16	29819181	29819202	-	1	0	AGO2	7mer-m8	ggaguaccuucccaAGGGGUGa	gucgcgucccucccUCCCCACg
MIMAT0002807	hsa-miR-491-5p	TCONS_l2_00010452	TCONS_l2_00010452	circRNA	chr16	29819181	29819202	-	1	0	AGO2	7mer-m8	ggaguaccuucccaAGGGGUGa	gucgcgucccucccUCCCCACg
MIMAT0002807	hsa-miR-491-5p	NM_001031827	BOLA2	circRNA	chr16	29869860	29869879	-	8	0	AGO1-4	7mer-m8	ggAGUACCUUCCCAAGGGGUGa	gcUCAUG--UGGUGUCCCCACc
MIMAT0002807	hsa-miR-491-5p	NM_006319	CDIPT	circRNA	chr16	29869860	29869879	-	8	0	AGO1-4	7mer-m8	ggAGUACCUUCCCAAGGGGUGa	gcUCAUG--UGGUGUCCCCACc
MIMAT0002807	hsa-miR-491-5p	NR_002453	LOC595101	circRNA	chr16	29869860	29869879	-	8	0	AGO1-4	7mer-m8	ggAGUACCUUCCCAAGGGGUGa	gcUCAUG--UGGUGUCCCCACc
MIMAT0002807	hsa-miR-491-5p	TCONS_l2_00010452	TCONS_l2_00010452	circRNA	chr16	29869860	29869879	-	8	0	AGO1-4	7mer-m8	ggAGUACCUUCCCAAGGGGUGa	gcUCAUG--UGGUGUCCCCACc
MIMAT0002807	hsa-miR-491-5p	NM_001031827	BOLA2	circRNA	chr16	29870442	29870463	-	5	0	AGO1-4,AGO2	7mer-m8	ggaguaccuuccCAAGGGGUGa	cugugccacacaGCUCCCCACc
MIMAT0002807	hsa-miR-491-5p	NM_006319	CDIPT	circRNA	chr16	29870442	29870463	-	5	0	AGO1-4,AGO2	7mer-m8	ggaguaccuuccCAAGGGGUGa	cugugccacacaGCUCCCCACc
MIMAT0002807	hsa-miR-491-5p	NR_002453	LOC595101	circRNA	chr16	29870442	29870463	-	5	0	AGO1-4,AGO2	7mer-m8	ggaguaccuuccCAAGGGGUGa	cugugccacacaGCUCCCCACc
MIMAT0002807	hsa-miR-491-5p	TCONS_l2_00010452	TCONS_l2_00010452	circRNA	chr16	29870442	29870463	-	5	0	AGO1-4,AGO2	7mer-m8	ggaguaccuuccCAAGGGGUGa	cugugccacacaGCUCCCCACc
MIMAT0002807	hsa-miR-491-5p	NM_001031827	BOLA2	circRNA	chr16	29898935	29898958	-	1	0	AGO1-4	7mer-m8	ggAGUACCU--UCCCAAGGGGUGa	ggUCUUGGGUCAGAAGUCCCCACc
MIMAT0002807	hsa-miR-491-5p	NR_002453	LOC595101	circRNA	chr16	29898935	29898958	-	1	0	AGO1-4	7mer-m8	ggAGUACCU--UCCCAAGGGGUGa	ggUCUUGGGUCAGAAGUCCCCACc
MIMAT0002807	hsa-miR-491-5p	TCONS_l2_00010452	TCONS_l2_00010452	circRNA	chr16	29898935	29898958	-	1	0	AGO1-4	7mer-m8	ggAGUACCU--UCCCAAGGGGUGa	ggUCUUGGGUCAGAAGUCCCCACc
MIMAT0002807	hsa-miR-491-5p	NM_181718	ASPHD1	circRNA	chr16	29913004	29913023	+	1	0	AGO1-4	7mer-m8	ggAGUACCUUCCCAAGGGGUGa	ccUCGGGGCUGG--UCCCCACc
MIMAT0002807	hsa-miR-491-5p	NM_001031827	BOLA2	circRNA	chr16	29917790	29917811	-	1	0	AGO2	7mer-m8	ggaguaccuucccaAGGGGUGa	aguccgcccccuccUCCCCACc
MIMAT0002807	hsa-miR-491-5p	NR_002453	LOC595101	circRNA	chr16	29917790	29917811	-	1	0	AGO2	7mer-m8	ggaguaccuucccaAGGGGUGa	aguccgcccccuccUCCCCACc
MIMAT0002807	hsa-miR-491-5p	TCONS_l2_00010452	TCONS_l2_00010452	circRNA	chr16	29917790	29917811	-	1	0	AGO2	7mer-m8	ggaguaccuucccaAGGGGUGa	aguccgcccccuccUCCCCACc
MIMAT0002807	hsa-miR-491-5p	NM_001031827	BOLA2	circRNA	chr16	29917955	29917976	-	1	1	AGO1-4	7mer-m8	ggaguaccuucccaAGGGGUGa	gaagccaacacuugUCCCCACc
MIMAT0002807	hsa-miR-491-5p	NR_002453	LOC595101	circRNA	chr16	29917955	29917976	-	1	1	AGO1-4	7mer-m8	ggaguaccuucccaAGGGGUGa	gaagccaacacuugUCCCCACc
MIMAT0002807	hsa-miR-491-5p	TCONS_l2_00010452	TCONS_l2_00010452	circRNA	chr16	29917955	29917976	-	1	1	AGO1-4	7mer-m8	ggaguaccuucccaAGGGGUGa	gaagccaacacuugUCCCCACc
MIMAT0002807	hsa-miR-491-5p	NM_001031827	BOLA2	circRNA	chr16	29925700	29925725	-	1	0	AGO1-4	7mer-m8	ggaGUACCUUCCC----AAGGGGUGa	cugCAUGCUAGAGCCACAUCCCCACc
MIMAT0002807	hsa-miR-491-5p	NR_002453	LOC595101	circRNA	chr16	29925700	29925725	-	1	0	AGO1-4	7mer-m8	ggaGUACCUUCCC----AAGGGGUGa	cugCAUGCUAGAGCCACAUCCCCACc
MIMAT0002807	hsa-miR-491-5p	TCONS_l2_00010452	TCONS_l2_00010452	circRNA	chr16	29925700	29925725	-	1	0	AGO1-4	7mer-m8	ggaGUACCUUCCC----AAGGGGUGa	cugCAUGCUAGAGCCACAUCCCCACc
MIMAT0002807	hsa-miR-491-5p	NM_001031827	BOLA2	circRNA	chr16	29934688	29934709	-	1	0	AGO1-4	7mer-m8	ggaguaccuucccaAGGGGUGa	uuucccccugccucUCCCCACc
MIMAT0002807	hsa-miR-491-5p	NR_002453	LOC595101	circRNA	chr16	29934688	29934709	-	1	0	AGO1-4	7mer-m8	ggaguaccuucccaAGGGGUGa	uuucccccugccucUCCCCACc
MIMAT0002807	hsa-miR-491-5p	TCONS_l2_00010452	TCONS_l2_00010452	circRNA	chr16	29934688	29934709	-	1	0	AGO1-4	7mer-m8	ggaguaccuucccaAGGGGUGa	uuucccccugccucUCCCCACc
MIMAT0002807	hsa-miR-491-5p	NM_001031827	BOLA2	circRNA	chr16	30028078	30028098	-	2	0	AGO1-4	8mer	ggaGUACCUUCCCAAGGGGUGa	gggCCUGG-UUGUAUCCCCACa
MIMAT0002807	hsa-miR-491-5p	NR_002453	LOC595101	circRNA	chr16	30028078	30028098	-	2	0	AGO1-4	8mer	ggaGUACCUUCCCAAGGGGUGa	gggCCUGG-UUGUAUCCCCACa
MIMAT0002807	hsa-miR-491-5p	TCONS_l2_00010452	TCONS_l2_00010452	circRNA	chr16	30028078	30028098	-	2	0	AGO1-4	8mer	ggaGUACCUUCCCAAGGGGUGa	gggCCUGG-UUGUAUCCCCACa
MIMAT0002807	hsa-miR-491-5p	NM_001031827	BOLA2	circRNA	chr16	30028178	30028199	-	2	0	AGO1-4	7mer-m8	ggaguaccuucccaAGGGGUGa	cugaccauccccugUCCCCACg
MIMAT0002807	hsa-miR-491-5p	NR_002453	LOC595101	circRNA	chr16	30028178	30028199	-	2	0	AGO1-4	7mer-m8	ggaguaccuucccaAGGGGUGa	cugaccauccccugUCCCCACg
MIMAT0002807	hsa-miR-491-5p	TCONS_l2_00010452	TCONS_l2_00010452	circRNA	chr16	30028178	30028199	-	2	0	AGO1-4	7mer-m8	ggaguaccuucccaAGGGGUGa	cugaccauccccugUCCCCACg
MIMAT0002807	hsa-miR-491-5p	NM_002720	PPP4C	circRNA	chr16	30096558	30096579	+	8	1	AGO1,AGO1-4,AGO2	7mer-m8	ggaguaccuucccaAGGGGUGa	uuccuccuccucucUCCCCACu
MIMAT0002807	hsa-miR-491-5p	NM_001031827	BOLA2	circRNA	chr16	30106220	30106241	-	3	0	AGO1-4	8mer	ggaguaccuucccaAGGGGUGa	gggacuaccccaugUCCCCACa
MIMAT0002807	hsa-miR-491-5p	NR_002453	LOC595101	circRNA	chr16	30106220	30106241	-	3	0	AGO1-4	8mer	ggaguaccuucccaAGGGGUGa	gggacuaccccaugUCCCCACa
MIMAT0002807	hsa-miR-491-5p	TCONS_l2_00010452	TCONS_l2_00010452	circRNA	chr16	30106220	30106241	-	3	0	AGO1-4	8mer	ggaguaccuucccaAGGGGUGa	gggacuaccccaugUCCCCACa
MIMAT0002807	hsa-miR-491-5p	NM_001031827	BOLA2	circRNA	chr16	30125852	30125873	-	2	1	AGO1-4	7mer-m8	ggaguaccuucccaAGGGGUGa	cuccccacccgcccUCCCCACg
MIMAT0002807	hsa-miR-491-5p	NR_002453	LOC595101	circRNA	chr16	30125852	30125873	-	2	1	AGO1-4	7mer-m8	ggaguaccuucccaAGGGGUGa	cuccccacccgcccUCCCCACg
MIMAT0002807	hsa-miR-491-5p	TCONS_l2_00010452	TCONS_l2_00010452	circRNA	chr16	30125852	30125873	-	2	1	AGO1-4	7mer-m8	ggaguaccuucccaAGGGGUGa	cuccccacccgcccUCCCCACg
MIMAT0002807	hsa-miR-491-5p	NM_001031827	BOLA2	circRNA	chr16	30125865	30125886	-	2	2	AGO1-4	7mer-m8	ggaguaccuucccaAGGGGUGa	ccaaggccuucuccUCCCCACc
MIMAT0002807	hsa-miR-491-5p	NR_002453	LOC595101	circRNA	chr16	30125865	30125886	-	2	2	AGO1-4	7mer-m8	ggaguaccuucccaAGGGGUGa	ccaaggccuucuccUCCCCACc
MIMAT0002807	hsa-miR-491-5p	TCONS_l2_00010452	TCONS_l2_00010452	circRNA	chr16	30125865	30125886	-	2	2	AGO1-4	7mer-m8	ggaguaccuucccaAGGGGUGa	ccaaggccuucuccUCCCCACc
MIMAT0002807	hsa-miR-491-5p	NM_001105079	FBRS	circRNA	chr16	30680135	30680156	+	1	0	AGO1-4	7mer-m8	ggaguaccuucccaAGGGGUGa	caccagccuucgccUCCCCACc
MIMAT0002807	hsa-miR-491-5p	NM_001105079	FBRS	circRNA	chr16	30680911	30680932	+	2	0	AGO2	7mer-m8	ggaguaccuuccCAAGGGGUGa	ccccccggcccaGUUCCCCACc
MIMAT0002807	hsa-miR-491-5p	NM_006662	SRCAP	circRNA	chr16	30735059	30735080	+	9	1	AGO1-4,AGO2	7mer-m8	ggaguaccuucccaAGGGGUGa	acuccccaucucugUCCCCACc
MIMAT0002807	hsa-miR-491-5p	NM_006662	SRCAP	circRNA	chr16	30750349	30750369	+	5	0	AGO1-4	7mer-m8	ggaGUACCUUCCCAAGGGGUGa	cacCAUUUCAACG-UCCCCACc
MIMAT0002807	hsa-miR-491-5p	NM_006662	SRCAP	circRNA	chr16	30751286	30751307	+	1	0	AGO1-4	7mer-m8	ggaguaccuucccaAGGGGUGa	caagauagucucugUCCCCACc
MIMAT0002807	hsa-miR-491-5p	NM_152288	ORAI3	circRNA	chr16	30965955	30965981	+	1	0	AGO2	7mer-m8	ggAGUACCUUCC-----CAAGGGGUGa	uaUCUUUGGAGGUUCAAGCUCCCCACc
MIMAT0002807	hsa-miR-491-5p	NM_014712	SETD1A	circRNA	chr16	30977066	30977087	+	15	0	AGO1,AGO1-4,AGO2	7mer-m8	ggAGUACCUUCCCAAGGGGUGa	ccUCUUGGUUAUCCUCCCCACc
MIMAT0002807	hsa-miR-491-5p	NM_018206	VPS35	circRNA	chr16	46722582	46722604	-	1	0	AGO1-4	7mer-m8	ggAGUACCUUCC-CAAGGGGUGa	agUUGUGCUCGGCCGUCCCCACg
MIMAT0002807	hsa-miR-491-5p	NM_005880	DNAJA2	circRNA	chr16	46989348	46989372	-	2	0	AGO1-4	8mer	ggaGUACCUUCC---CAAGGGGUGa	uugUAUCCAAGGUUACUUCCCCACa
MIMAT0002807	hsa-miR-491-5p	NM_030790	ITFG1	circRNA	chr16	47420743	47420762	-	1	0	AGO1-4	8mer	ggaguACCUUCCCAAGGGGUGa	uaggcUUGAA--CUUCCCCACa
MIMAT0002807	hsa-miR-491-5p	NM_153029	N4BP1	circRNA	chr16	48573635	48573657	-	1	0	AGO1-4	7mer-m8	ggaGUACCU-UCCCAAGGGGUGa	uggCUUGCAGACUUUUCCCCACc
MIMAT0002807	hsa-miR-491-5p	NM_005611	RBL2	circRNA	chr16	53515659	53515680	+	2	0	AGO1-4,AGO2	8mer	ggaguaccuucccAAGGGGUGa	auccugucuacauUUCCCCACa
MIMAT0002807	hsa-miR-491-5p	NM_001080432	FTO	circRNA	chr16	53970265	53970286	+	1	0	AGO1-4	7mer-m8	ggaguaccuucccaAGGGGUGa	aaccauaauccuucUCCCCACc
MIMAT0002807	hsa-miR-491-5p	NM_032206	NLRC5	circRNA	chr16	57060523	57060544	+	1	0	AGO2	7mer-m8	ggaguaccuucccaAGGGGUGa	ccucucagaccaccUCCCCACc
MIMAT0002807	hsa-miR-491-5p	NM_012106	ARL2BP	circRNA	chr16	57286378	57286399	+	7	1	AGO1-4,AGO2	7mer-m8	ggaGUACCUUCCCAAGGGGUGa	aacCAUAGUACUCCUCCCCACc
MIMAT0002807	hsa-miR-491-5p	NM_002990	CCL22	circRNA	chr16	57397754	57397775	+	3	0	AGO1-4,AGO2	7mer-m8	ggaguaccuUCCCAAGGGGUGa	aacccuuccAUGACUCCCCACu
MIMAT0002807	hsa-miR-491-5p	NM_032940	POLR2C	circRNA	chr16	57505551	57505572	+	8	1	AGO1-4,AGO2	7mer-m8	ggaguaccuucccaAGGGGUGa	cccuggcuguccccUCCCCACc
MIMAT0002807	hsa-miR-491-5p	NM_018110	DOK4	circRNA	chr16	57506342	57506363	-	2	0	AGO1-4,AGO2	8mer	ggaguaccuucccaAGGGGUGa	uucccauuuccuccUCCCCACa
MIMAT0002807	hsa-miR-491-5p	NM_001130100	KIFC3	circRNA	chr16	57799387	57799413	-	1	0	AGO1-4	8mer	ggaguACCU-UCCCA----AGGGGUGa	cgagcUGGACAAGGUCUUCUCCCCACa
MIMAT0002807	hsa-miR-491-5p	NM_006141	DYNC1LI2	circRNA	chr16	66756392	66756414	-	5	0	AGO1-4,AGO2	7mer-m8	ggaguaccUUCCCA-AGGGGUGa	agaguuucAGGUGUCUCCCCACc
MIMAT0002807	hsa-miR-491-5p	NM_006141	DYNC1LI2	circRNA	chr16	66770090	66770111	-	9	0	AGO1-4,AGO2	8mer	ggaguACCUUCCCAAGGGGUGa	aagguUGUCAAGGUUCCCCACa
MIMAT0002807	hsa-miR-491-5p	NR_036684	CES2	circRNA	chr16	66968568	66968589	+	1	0	AGO1	8mer	ggaguaCCUUCCCAAGGGGUGa	gcggucGGAGGUAAUCCCCACa
MIMAT0002807	hsa-miR-491-5p	NR_036684	CES2	circRNA	chr16	66968723	66968744	+	1	0	AGO1-4	8mer	ggaguaCCUUCCCAAGGGGUGa	ccgggaGUACGGCGUCCCCACa
MIMAT0002807	hsa-miR-491-5p	NR_036684	CES2	circRNA	chr16	66969320	66969341	+	4	0	AGO1,AGO1-4,AGO2	7mer-m8	ggaguaccuuccCAAGGGGUGa	ugccuaccacuaGAUCCCCACc
MIMAT0002807	hsa-miR-491-5p	NM_013241	FHOD1	circRNA	chr16	67267740	67267761	-	4	0	AGO1-4,AGO2	7mer-m8	ggaguaccuUCCCAAGGGGUGa	ugacagcucAGCCCUCCCCACu
MIMAT0002807	hsa-miR-491-5p	NM_006565	CTCF	circRNA	chr16	67655440	67655461	+	3	0	AGO1-4,AGO2	7mer-m8	ggaguaccuucccaAGGGGUGa	gccaaauuucacugUCCCCACu
MIMAT0002807	hsa-miR-491-5p	NM_025082	CENPT	circRNA	chr16	67862092	67862113	-	4	0	AGO1-4,AGO2	7mer-m8	ggaguaccuucccaAGGGGUGa	uucuccaggucuccUCCCCACc
MIMAT0002807	hsa-miR-491-5p	NM_025082	CENPT	circRNA	chr16	67862137	67862158	-	2	4	AGO1-4,AGO2	7mer-m8	ggaguaccuucccaAGGGGUGa	caacacuuucccugUCCCCACc
MIMAT0002807	hsa-miR-491-5p	NM_014329	EDC4	circRNA	chr16	67914686	67914707	+	2	0	AGO2	7mer-m8	ggaguaccuucccaAGGGGUGa	cacugcaccugcugUCCCCACg
MIMAT0002807	hsa-miR-491-5p	NM_012320	PLA2G15	circRNA	chr16	68293312	68293335	+	2	0	AGO1-4	8mer	ggaGUACCUU--CCCAAGGGGUGa	cucUAUGGUACUGGCGUCCCCACa
MIMAT0002807	hsa-miR-491-5p	NM_001793	CDH3	circRNA	chr16	68721548	68721570	+	1	0	AGO1-4	8mer	ggaGUACCUUCCCA-AGGGGUGa	ggaCAAGGACCUGUCUCCCCACa
MIMAT0002807	hsa-miR-491-5p	NM_007014	WWP2	circRNA	chr16	69921989	69922008	+	3	0	AGO1-4	7mer-m8	ggAGUACCUUCCCAAGGGGUGa	guUGGUGUGACG--UCCCCACc
MIMAT0002807	hsa-miR-491-5p	NM_017990	PDPR	circRNA	chr16	70191604	70191623	+	5	0	AGO1-4,AGO2	7mer-m8	ggaGUACCUUCCCAAGGGGUGa	gacCUUAGAAAG--UCCCCACc
MIMAT0002807	hsa-miR-491-5p	NM_012426	SF3B3	circRNA	chr16	70605907	70605928	+	25	1	AGO1,AGO1-4,AGO2	7mer-m8	ggaguaccuucccaAGGGGUGa	auuugcuacacuucUCCCCACc
MIMAT0002807	hsa-miR-491-5p	NM_138383	MTSS1L	circRNA	chr16	70697733	70697754	-	1	0	AGO2	7mer-m8	ggaguaccuucccAAGGGGUGa	gggccaguuccccUUCCCCACu
MIMAT0002807	hsa-miR-491-5p	NM_014761	IST1	circRNA	chr16	71962742	71962763	+	12	0	AGO1,AGO1-4,AGO2	8mer	ggaguaccuucccAAGGGGUGa	gcuaaggucauccUUCCCCACa
MIMAT0002807	hsa-miR-491-5p	NM_017853	TXNL4B	circRNA	chr16	72120290	72120311	-	2	0	AGO1-4	8mer	ggaguaccuucccAAGGGGUGa	auugguguucauuUUCCCCACa
MIMAT0002807	hsa-miR-491-5p	NR_027264	GLG1	circRNA	chr16	74482223	74482244	-	1	0	AGO1-4	7mer-m8	ggaguaccuucccaAGGGGUGa	ggacacuuccuuccUCCCCACu
MIMAT0002807	hsa-miR-491-5p	NR_027264	GLG1	circRNA	chr16	74486991	74487012	-	10	0	AGO1-4,AGO2	7mer-m8	ggAGUACCUUCCCAAGGGGUGa	ccUCUUGUAUAGCAUCCCCACu
MIMAT0002807	hsa-miR-491-5p	NM_018124	RFWD3	circRNA	chr16	74655455	74655476	-	10	3	AGO1,AGO1-4,AGO2	7mer-m8	ggaguaccuucccAAGGGGUGa	ccucuaaguuuuuUUCCCCACu
MIMAT0002807	hsa-miR-491-5p	NM_016373	WWOX	circRNA	chr16	78466513	78466534	+	1	0	AGO1-4	7mer-m8	ggaguaccuucccaAGGGGUGa	ugcaccgucgccucUCCCCACg
MIMAT0002807	hsa-miR-491-5p	NM_198390	CMIP	circRNA	chr16	81744420	81744441	+	3	0	AGO1-4,AGO2	7mer-m8	ggAGUACCUUCCCAAGGGGUGa	ggUAAAAGAGCUGUUCCCCACc
MIMAT0002807	hsa-miR-491-5p	NM_198390	CMIP	circRNA	chr16	81744602	81744623	+	3	0	AGO1-4,AGO2	7mer-m8	ggaguaccuucccaAGGGGUGa	caguccgacugcccUCCCCACc
MIMAT0002807	hsa-miR-491-5p	NM_198390	CMIP	circRNA	chr16	81744662	81744683	+	7	0	AGO1-4,AGO2	7mer-m8	ggaguaccuucccaAGGGGUGa	agacacuccuucugUCCCCACc
MIMAT0002807	hsa-miR-491-5p	NM_003791	MBTPS1	circRNA	chr16	84127370	84127390	-	3	0	AGO1-4,AGO2	7mer-m8	ggaguacCUUCCCAAGGGGUGa	ugagcgaGAA-GCAUCCCCACu
MIMAT0002807	hsa-miR-491-5p	NM_020947	KIAA1609	circRNA	chr16	84512192	84512211	-	5	0	AGO1-4,AGO2	7mer-m8	ggaGUACCUUCCCAAGGGGUGa	ggcCAUG--AGAUCUCCCCACu
MIMAT0002807	hsa-miR-491-5p	NM_001145548	ZDHHC7	circRNA	chr16	85009761	85009782	-	4	0	AGO1,AGO1-4,AGO2	7mer-m8	ggaguaccuucccaAGGGGUGa	gaagaggcucucagUCCCCACc
MIMAT0002807	hsa-miR-491-5p	NM_014615	KIAA0182	circRNA	chr16	85689368	85689389	+	1	1	AGO1-4	7mer-m8	ggaguaccuucccaAGGGGUGa	cccguucuaccccaUCCCCACc
MIMAT0002807	hsa-miR-491-5p	NM_003486	SLC7A5	circRNA	chr16	87865429	87865450	-	8	0	AGO1,AGO1-4,AGO2	7mer-m8	ggaguaccuucccaAGGGGUGa	gggcucucacccagUCCCCACc
MIMAT0002807	hsa-miR-491-5p	NM_003486	SLC7A5	circRNA	chr16	87902540	87902561	-	1	0	AGO1-4	7mer-m8	ggAGUACCUUCCCAAGGGGUGa	gcUCAAGCCGCUCUUCCCCACc
MIMAT0002807	hsa-miR-491-5p	NM_000101	CYBA	circRNA	chr16	88713101	88713125	-	1	0	AGO1-4	7mer-m8	ggaGUACCUUCCC---AAGGGGUGa	gggCUUGGAGCCGACCCUCCCCACu
MIMAT0002807	hsa-miR-491-5p	NM_001142864	PIEZO1	circRNA	chr16	88781834	88781861	-	15	0	AGO1-4,AGO2	7mer-m8	ggAGUACCUUCC-----C-AAGGGGUGa	ugUCAGAGAAGGACACUGCGUCCCCACg
MIMAT0002807	hsa-miR-491-5p	NM_030928	CDT1	circRNA	chr16	88872193	88872216	+	5	0	AGO1,AGO1-4,AGO2	7mer-m8	ggaGUACCUUCC--CA-AGGGGUGa	cgcCA-GGAGCGCAGUGUCCCCACc
MIMAT0002807	hsa-miR-491-5p	NM_000485	APRT	circRNA	chr16	88878245	88878266	-	9	0	AGO1-4,AGO2	7mer-m8	ggaguaccuucccAAGGGGUGa	cagcuuccccgacUUCCCCACc
MIMAT0002807	hsa-miR-491-5p	NM_013275	ANKRD11	circRNA	chr16	89491139	89491160	-	1	0	AGO1-4	7mer-m8	ggaguaccuucccaAGGGGUGa	ccuuccagcccaucUCCCCACc
MIMAT0002807	hsa-miR-491-5p	hsa_circ_0000726	hsa_circ_000620	circRNA	chr16	89491139	89491160	-	1	0	AGO1-4	7mer-m8	ggaguaccuucccaAGGGGUGa	ccuuccagcccaucUCCCCACc
MIMAT0002807	hsa-miR-491-5p	hsa_circ_0000727	hsa_circ_002048	circRNA	chr16	89491139	89491160	-	1	0	AGO1-4	7mer-m8	ggaguaccuucccaAGGGGUGa	ccuuccagcccaucUCCCCACc
MIMAT0002807	hsa-miR-491-5p	NM_014427	CPNE7	circRNA	chr16	89663428	89663449	+	1	0	AGO2	8mer	ggaguaccuucccaAGGGGUGa	gacccagacaccugUCCCCACa
MIMAT0002807	hsa-miR-491-5p	NM_014427	CPNE7	circRNA	chr16	89663464	89663485	+	1	0	AGO2	8mer	ggaguaccuucccaAGGGGUGa	acccagacauccugUCCCCACa
MIMAT0002807	hsa-miR-491-5p	NM_002768	CHMP1A	circRNA	chr16	89712406	89712427	-	2	0	AGO1-4	7mer-m8	ggaguaccuucccaAGGGGUGa	aggcuccuguccucUCCCCACc
MIMAT0002807	hsa-miR-491-5p	NM_004913	C16orf7	circRNA	chr16	89775756	89775777	-	1	0	AGO2	7mer-m8	ggaguaccuuCCCAAGGGGUGa	caccgccauuGGCAUCCCCACc
MIMAT0002807	hsa-miR-491-5p	NM_001197181	TUBB3	circRNA	chr16	90002348	90002371	+	2	0	AGO1-4	7mer-m8	ggAGUACCUUCCCA--AGGGGUGa	auUUAUGGCCUCGUCCUCCCCACc
MIMAT0002807	hsa-miR-491-5p	NM_015721	GEMIN4	circRNA	chr17	650965	650986	-	9	0	AGO1,AGO1-4,AGO2	7mer-m8	ggaguaccuuccCAAGGGGUGa	ggugggcaacauGAUCCCCACc
MIMAT0002807	hsa-miR-491-5p	NM_022463	NXN	circRNA	chr17	708477	708487	-	1	0	AGO1-4	7mer-m8	ggaguaccuucccaAGGGGUGa	#NAME?
MIMAT0002807	hsa-miR-491-5p	NM_001135642	INPP5K	circRNA	chr17	1412566	1412587	-	3	0	AGO1-4,AGO2	8mer	ggaguaccuucccaAGGGGUGa	aacugccaccugccUCCCCACa
MIMAT0002807	hsa-miR-491-5p	NM_152346	SLC43A2	circRNA	chr17	1478014	1478035	-	1	0	AGO2	7mer-m8	ggaguaccuucccaAGGGGUGa	ggaguuagcccuuaUCCCCACu
MIMAT0002807	hsa-miR-491-5p	hsa_circ_0000731	hsa_circ_001263	circRNA	chr17	1478014	1478035	-	1	0	AGO2	7mer-m8	ggaguaccuucccaAGGGGUGa	ggaguuagcccuuaUCCCCACu
MIMAT0002807	hsa-miR-491-5p	NM_006445	PRPF8	circRNA	chr17	1563807	1563831	-	7	0	AGO1-4	7mer-m8	ggAGUACCUUCC---CAAGGGGUGa	cuUCAUGCACGGCAAGAUCCCCACg
MIMAT0002807	hsa-miR-491-5p	NM_000934	SERPINF2	circRNA	chr17	1658116	1658138	+	1	0	AGO1-4	7mer-m8	ggaGUACCUUC-CCAAGGGGUGa	agaCAGGUUAGCUGCUCCCCACg
MIMAT0002807	hsa-miR-491-5p	NM_001165920	SERPINF2	circRNA	chr17	1658116	1658138	+	1	0	AGO1-4	7mer-m8	ggaGUACCUUC-CCAAGGGGUGa	agaCAGGUUAGCUGCUCCCCACg
MIMAT0002807	hsa-miR-491-5p	NM_014853	SGSM2	circRNA	chr17	2274652	2274673	+	1	1	AGO1-4	8mer	ggAGUACCUUCCCAAGGGGUGa	gcUCCUCCAGCAGCUCCCCACa
MIMAT0002807	hsa-miR-491-5p	NM_014853	SGSM2	circRNA	chr17	2283938	2283959	+	1	0	AGO1-4	7mer-m8	ggaguaccuucccaAGGGGUGa	ugcuugcucggccaUCCCCACu
MIMAT0002807	hsa-miR-491-5p	NM_024086	METTL16	circRNA	chr17	2319842	2319863	-	3	0	AGO1-4,AGO2	7mer-m8	ggaguaccuucccaAGGGGUGa	ugcuggccgcacugUCCCCACu
MIMAT0002807	hsa-miR-491-5p	NM_024086	METTL16	circRNA	chr17	2319866	2319887	-	3	0	AGO1-4,AGO2	8mer	ggaguaccuucccAAGGGGUGa	ucagccugcuuccUUCCCCACa
MIMAT0002807	hsa-miR-491-5p	NM_015229	KIAA0664	circRNA	chr17	2592763	2592784	-	5	0	AGO1-4,AGO2	7mer-m8	ggaGUACCUUCCCAAGGGGUGa	gggCAAGCAGAGCAUCCCCACc
MIMAT0002807	hsa-miR-491-5p	NM_174953	ATP2A3	circRNA	chr17	3833648	3833669	-	2	0	AGO1-4	7mer-m8	ggAGUACCUUCCCAAGGGGUGa	guUCGAGUCACGCUUCCCCACc
MIMAT0002807	hsa-miR-491-5p	NM_015113	ZZEF1	circRNA	chr17	3975990	3976011	-	2	0	AGO1-4,AGO2	7mer-m8	ggaguaccuuccCAAGGGGUGa	cauuaguccuaaGCUCCCCACu
MIMAT0002807	hsa-miR-491-5p	NM_014520	MYBBP1A	circRNA	chr17	4445352	4445379	-	1	0	AGO2	7mer-m8	ggaguACCUUC-----CCA-AGGGGUGa	ccagcUGGGAGGCCUUGGUGUCCCCACc
MIMAT0002807	hsa-miR-491-5p	NM_005022	PFN1	circRNA	chr17	4849160	4849181	-	30	0	AGO1-4,AGO2	8mer	ggaguaccuuccCAAGGGGUGa	uuccccuucaccGCUCCCCACa
MIMAT0002807	hsa-miR-491-5p	NM_001171167	CAMTA2	circRNA	chr17	4885414	4885435	-	1	0	AGO2	8mer	ggaguaccuucccaAGGGGUGa	ucacucuuccaucgUCCCCACa
MIMAT0002807	hsa-miR-491-5p	NM_006612	KIF1C	circRNA	chr17	4929243	4929264	+	2	0	AGO1-4	8mer	ggaguaccuuCCCAAGGGGUGa	gccagacucuGGAGUCCCCACa
MIMAT0002807	hsa-miR-491-5p	NM_002532	NUP88	circRNA	chr17	5317360	5317381	-	1	0	AGO2	7mer-m8	ggaguaccuucCCAAGGGGUGa	agugaaauccuGGAUCCCCACg
MIMAT0002807	hsa-miR-491-5p	hsa_circ_0000739	hsa_circ_001080	circRNA	chr17	5317360	5317381	-	1	0	AGO2	7mer-m8	ggaguaccuucCCAAGGGGUGa	agugaaauccuGGAUCCCCACg
MIMAT0002807	hsa-miR-491-5p	NM_031220	PITPNM3	circRNA	chr17	6356917	6356938	-	1	0	AGO1-4	7mer-m8	ggaguaccuucccaAGGGGUGa	ccccaucccugcucUCCCCACu
MIMAT0002807	hsa-miR-491-5p	NM_024297	PHF23	circRNA	chr17	7138767	7138788	-	7	0	AGO1-4,AGO2	7mer-m8	ggaguaccuucccaAGGGGUGa	cacccuauccuuccUCCCCACu
MIMAT0002807	hsa-miR-491-5p	NM_001970	EIF5A	circRNA	chr17	7215254	7215275	+	26	0	AGO1,AGO1-4,AGO2	7mer-m8	ggAGUACCUUCCCAAGGGGUGa	uuUUAUUUUGGUUUUCCCCACc
MIMAT0002807	hsa-miR-491-5p	NM_001970	EIF5A	circRNA	chr17	7215488	7215509	+	18	0	AGO1,AGO1-4,AGO2,AGO3	7mer-m8	ggaguaccuucccaAGGGGUGa	ugguccuugugcccUCCCCACu
MIMAT0002807	hsa-miR-491-5p	NM_032442	NEURL4	circRNA	chr17	7230829	7230850	-	2	0	AGO2	8mer	ggaguaccuucccaAGGGGUGa	ccccccuacucccaUCCCCACa
MIMAT0002807	hsa-miR-491-5p	NM_001128833	ZBTB4	circRNA	chr17	7364078	7364100	-	17	0	AGO1-4,AGO2	8mer	ggAGUACCU-UCCCAAGGGGUGa	caUCUUUGACUCAGUUCCCCACa
MIMAT0002807	hsa-miR-491-5p	NM_001128833	ZBTB4	circRNA	chr17	7364132	7364154	-	16	0	AGO1,AGO1-4,AGO2	7mer-m8	ggaguaccuUCCCA-AGGGGUGa	gugggcuuuGGGGUAUCCCCACc
MIMAT0002807	hsa-miR-491-5p	NM_001128833	ZBTB4	circRNA	chr17	7369753	7369774	-	7	0	AGO2	7mer-m8	ggaguaccuucccAAGGGGUGa	cucccccugcuucUUCCCCACc
MIMAT0002807	hsa-miR-491-5p	NM_000937	POLR2A	circRNA	chr17	7415612	7415635	+	7	1	AGO1,AGO1-4,AGO2	7mer-m8	ggaGUACC-UUCC-CAAGGGGUGa	aagUAUGGCAUGGAGAUCCCCACc
MIMAT0002807	hsa-miR-491-5p	NR_037926	SENP3-EIF4A1	circRNA	chr17	7479937	7479956	+	21	2	AGO1,AGO1-4,AGO2	8mer	ggagUACCUUCCCAAGGGGUGa	gcagAUGGAA--GCUCCCCACa
MIMAT0002807	hsa-miR-491-5p	NM_001080424	KDM6B	circRNA	chr17	7750960	7750981	+	2	1	AGO1-4,AGO2	7mer-m8	ggaguaccuucccaAGGGGUGa	gcucccgcugccacUCCCCACc
MIMAT0002807	hsa-miR-491-5p	NM_001080424	KDM6B	circRNA	chr17	7751799	7751820	+	3	1	AGO1-4,AGO2	7mer-m8	ggaguaccuucccAAGGGGUGa	ucugcagucuccuUUCCCCACc
MIMAT0002807	hsa-miR-491-5p	NM_001080424	KDM6B	circRNA	chr17	7752170	7752191	+	8	0	AGO1-4,AGO2	8mer	ggaguaccuUCCCAAGGGGUGa	cuagcgcccAGGGCUCCCCACa
MIMAT0002807	hsa-miR-491-5p	NM_001005271	CHD3	circRNA	chr17	7815421	7815442	+	4	0	AGO1-4,AGO2	7mer-m8	ggaguaccuucccaAGGGGUGa	ccguccccuaccucUCCCCACg
MIMAT0002807	hsa-miR-491-5p	NM_025099	CTC1	circRNA	chr17	8137938	8137959	-	3	0	AGO1-4	7mer-m8	ggaguaccuucccAAGGGGUGa	gacucccuccuccUUCCCCACu
MIMAT0002807	hsa-miR-491-5p	NM_004822	NTN1	circRNA	chr17	9144950	9144971	+	2	0	AGO1,AGO2	8mer	ggaguaccuucccAAGGGGUGa	gcuucccuccgccUUCCCCACa
MIMAT0002807	hsa-miR-491-5p	NM_006311	NCOR1	circRNA	chr17	15952237	15952258	-	2	0	AGO1-4	7mer-m8	ggaguaccuucccaAGGGGUGa	ccuacgagcccaucUCCCCACc
MIMAT0002807	hsa-miR-491-5p	NM_201274	MPRIP	circRNA	chr17	17088598	17088619	+	10	0	AGO1-4,AGO2	7mer-m8	ggagUACCUUCCCAAGGGGUGa	caagGUAGAUGGAAUCCCCACu
MIMAT0002807	hsa-miR-491-5p	NM_004169	SHMT1	circRNA	chr17	18238888	18238910	-	3	0	AGO1-4	8mer	ggaGUACCUUCC-CAAGGGGUGa	uggCCUGCAGGGAGGUCCCCACa
MIMAT0002807	hsa-miR-491-5p	NM_014964	EPN2	circRNA	chr17	19237916	19237937	+	3	0	AGO1-4,AGO2	7mer-m8	ggaguaccuucccaAGGGGUGa	ccuugucuuuguccUCCCCACc
MIMAT0002807	hsa-miR-491-5p	NM_014683	ULK2	circRNA	chr17	19720184	19720205	-	1	0	AGO1-4	7mer-m8	ggaguaccuucccAAGGGGUGa	aagaaaacuuaucUUCCCCACc
MIMAT0002807	hsa-miR-491-5p	NM_007202	AKAP10	circRNA	chr17	19866311	19866332	-	3	0	AGO2	8mer	ggaguaccuucccAAGGGGUGa	caauauccguacaUUCCCCACa
MIMAT0002807	hsa-miR-491-5p	NM_014238	KSR1	circRNA	chr17	25910045	25910066	+	1	0	AGO2	8mer	ggaguaccuucCCAAGGGGUGa	gcugcugcccaGCUUCCCCACa
MIMAT0002807	hsa-miR-491-5p	NM_014238	KSR1	circRNA	chr17	25915502	25915522	+	1	0	AGO1-4	8mer	ggAGUACCUUCCCAAGGGGUGa	ucUC-UCGCAUGGAUCCCCACa
MIMAT0002807	hsa-miR-491-5p	NM_054035	UNC119	circRNA	chr17	26874593	26874614	-	1	0	AGO1-4	7mer-m8	ggaguaccuucccaAGGGGUGa	ucugaucccauuucUCCCCACc
MIMAT0002807	hsa-miR-491-5p	NM_004475	FLOT2	circRNA	chr17	27206482	27206503	-	5	0	AGO1-4,AGO2	7mer-m8	ggaguaccuuccCAAGGGGUGa	ccaguggucccaGCUCCCCACc
MIMAT0002807	hsa-miR-491-5p	hsa_circ_0000750	hsa_circ_001757	circRNA	chr17	27467028	27467049	-	1	0	AGO2	7mer-m8	ggaguaccUUCCCAAGGGGUGa	gcugugacACGCCUUCCCCACc
MIMAT0002807	hsa-miR-491-5p	hsa_circ_0000750	hsa_circ_001757	circRNA	chr17	27472315	27472336	-	1	0	AGO2	7mer-m8	ggaguaccuuccCAAGGGGUGa	ggagauccccuuGUUCCCCACu
MIMAT0002807	hsa-miR-491-5p	hsa_circ_0000750	hsa_circ_001757	circRNA	chr17	27479581	27479602	-	1	0	AGO2	7mer-m8	ggaguaccuucccaAGGGGUGa	cugcuuuauucuugUCCCCACg
MIMAT0002807	hsa-miR-491-5p	NM_001085454	GIT1	circRNA	chr17	27900903	27900924	-	2	2	AGO2	7mer-m8	ggaguaccuucccaAGGGGUGa	gccucccugaucccUCCCCACu
MIMAT0002807	hsa-miR-491-5p	NM_001085454	GIT1	circRNA	chr17	27901130	27901151	-	2	0	AGO1-4,AGO2	7mer-m8	ggaguaccuucccAAGGGGUGa	uuuuucuuucuucUUCCCCACc
MIMAT0002807	hsa-miR-491-5p	NM_001085454	GIT1	circRNA	chr17	27901639	27901660	-	4	0	AGO2	7mer-m8	ggaguaccuucccaAGGGGUGa	acuccagacauuaaUCCCCACc
MIMAT0002807	hsa-miR-491-5p	NM_001085454	GIT1	circRNA	chr17	27901706	27901727	-	2	0	AGO1-4,AGO2	8mer	ggaguaccuucccaAGGGGUGa	agcagugaccucucUCCCCACa
MIMAT0002807	hsa-miR-491-5p	NM_004871	GOSR1	circRNA	chr17	28849827	28849848	+	2	0	AGO1-4,AGO2	7mer-m8	ggaguaccuucccaAGGGGUGa	ucucccucucccucUCCCCACg
MIMAT0002807	hsa-miR-491-5p	NM_024857	ATAD5	circRNA	chr17	29058414	29058435	+	1	0	AGO1-4	8mer	ggaguaccuucccaAGGGGUGa	gcuggguccuucucUCCCCACa
MIMAT0002807	hsa-miR-491-5p	NR_015341	LRRC37BP1	circRNA	chr17	29058414	29058435	+	1	0	AGO1-4	8mer	ggaguaccuucccaAGGGGUGa	gcuggguccuucucUCCCCACa
MIMAT0002807	hsa-miR-491-5p	NM_024857	ATAD5	circRNA	chr17	29085597	29085618	+	1	0	AGO1-4	7mer-m8	ggaguaccuucccAAGGGGUGa	guacugcuuuccuUUCCCCACc
MIMAT0002807	hsa-miR-491-5p	NR_015341	LRRC37BP1	circRNA	chr17	29085597	29085618	+	1	0	AGO1-4	7mer-m8	ggaguaccuucccAAGGGGUGa	guacugcuuuccuUUCCCCACc
MIMAT0002807	hsa-miR-491-5p	NM_024857	ATAD5	circRNA	chr17	29099771	29099792	+	1	0	AGO1-4	7mer-m8	ggaguaccuucccaAGGGGUGa	uauaauuuguccugUCCCCACc
MIMAT0002807	hsa-miR-491-5p	NR_015341	LRRC37BP1	circRNA	chr17	29099771	29099792	+	1	0	AGO1-4	7mer-m8	ggaguaccuucccaAGGGGUGa	uauaauuuguccugUCCCCACc
MIMAT0002807	hsa-miR-491-5p	NM_001042492	NF1	circRNA	chr17	29422165	29422186	+	6	0	AGO1-4,AGO2	7mer-m8	ggaguaccuucccaAGGGGUGa	gcgcugaccccccaUCCCCACc
MIMAT0002807	hsa-miR-491-5p	NM_015355	SUZ12	circRNA	chr17	29422165	29422186	+	6	0	AGO1-4,AGO2	7mer-m8	ggaguaccuucccaAGGGGUGa	gcgcugaccccccaUCCCCACc
MIMAT0002807	hsa-miR-491-5p	NM_015355	SUZ12	circRNA	chr17	29676727	29676748	+	1	0	AGO1-4	7mer-m8	ggaguaccuucccaAGGGGUGa	gaguaucugcccuaUCCCCACc
MIMAT0002807	hsa-miR-491-5p	NM_015194	MYO1D	circRNA	chr17	30820630	30820651	-	1	0	AGO1	7mer-m8	ggaguaccuucccAAGGGGUGa	uucugagaccaccUUCCCCACu
MIMAT0002807	hsa-miR-491-5p	NM_013975	LIG3	circRNA	chr17	33331822	33331843	+	1	0	AGO2	7mer-m8	ggaguaccuucccAAGGGGUGa	uuaucuuuguccuUUCCCCACc
MIMAT0002807	hsa-miR-491-5p	NR_037713	RFFL	circRNA	chr17	33338628	33338649	-	1	0	AGO1-4	7mer-m8	ggaguaccuucccaAGGGGUGa	cuguacccaacccaUCCCCACc
MIMAT0002807	hsa-miR-491-5p	NM_001014445	NLE1	circRNA	chr17	33459350	33459371	-	1	0	AGO1	7mer-m8	ggaguaccuucccaAGGGGUGa	cagugcacacacccUCCCCACc
MIMAT0002807	hsa-miR-491-5p	NM_018042	SLFN12	circRNA	chr17	33747338	33747358	-	1	0	AGO2	8mer	ggAGUACCUUCCCAAGGGGUGa	cgUCAU-UACCUGCUCCCCACa
MIMAT0002807	hsa-miR-491-5p	NM_024308	DHRS11	circRNA	chr17	34956643	34956664	+	5	0	AGO1,AGO2	7mer-m8	ggaguaccuucccaAGGGGUGa	agcuccuccuucccUCCCCACc
MIMAT0002807	hsa-miR-491-5p	NM_198839	ACACA	circRNA	chr17	35442294	35442315	-	1	2	AGO2	7mer-m8	ggaguaccuucccaAGGGGUGa	auuuaccuccccucUCCCCACc
MIMAT0002807	hsa-miR-491-5p	NM_198838	ACACA	circRNA	chr17	35563752	35563773	-	1	0	AGO1-4	7mer-m8	ggaguaccuucccaAGGGGUGa	gcugcuucucugacUCCCCACc
MIMAT0002807	hsa-miR-491-5p	NM_198839	ACACA	circRNA	chr17	35563752	35563773	-	1	0	AGO1-4	7mer-m8	ggaguaccuucccaAGGGGUGa	gcugcuucucugacUCCCCACc
MIMAT0002807	hsa-miR-491-5p	NR_036750	LOC440434	circRNA	chr17	36382701	36382722	-	1	0	AGO1-4	7mer-m8	ggaGUACCUUCCCAAGGGGUGa	ggcCUUGCUAGGUUUCCCCACu
MIMAT0002807	hsa-miR-491-5p	NM_005937	MLLT6	circRNA	chr17	36869012	36869033	+	1	0	AGO1-4	7mer-m8	ggaguaccuuCCCAAGGGGUGa	caccccgcccGUGGUCCCCACu
MIMAT0002807	hsa-miR-491-5p	NM_005937	MLLT6	circRNA	chr17	36872856	36872877	+	2	0	AGO1-4	7mer-m8	ggaguaccuUCCCAAGGGGUGa	ggggacuauAAGUCUCCCCACg
MIMAT0002807	hsa-miR-491-5p	NM_003559	PIP4K2B	circRNA	chr17	36924013	36924036	-	2	0	AGO2	7mer-m8	ggaguACCU--UCCCAAGGGGUGa	auguuUGGACUUGAUUUCCCCACg
MIMAT0002807	hsa-miR-491-5p	NM_006148	LASP1	circRNA	chr17	37075794	37075815	+	2	0	AGO1-4,AGO2	7mer-m8	ggaguaccuucccAAGGGGUGa	uuccgcagccccuUUCCCCACg
MIMAT0002807	hsa-miR-491-5p	NM_001242442	GRB7	circRNA	chr17	37901551	37901572	+	1	0	AGO1-4	7mer-m8	ggAGUACCUUCCCAAGGGGUGa	caUCUUGUUUGGGCUCCCCACc
MIMAT0002807	hsa-miR-491-5p	NM_005310	GRB7	circRNA	chr17	37901551	37901572	+	1	0	AGO1-4	7mer-m8	ggAGUACCUUCCCAAGGGGUGa	caUCUUGUUUGGGCUCCCCACc
MIMAT0002807	hsa-miR-491-5p	NM_001079518	MED24	circRNA	chr17	38189402	38189423	-	1	0	AGO1-4	7mer-m8	ggaGUACCUUCCCAAGGGGUGa	gcaCAAGACCGGCUUCCCCACu
MIMAT0002807	hsa-miR-491-5p	NM_014815	MED24	circRNA	chr17	38189402	38189423	-	1	0	AGO1-4	7mer-m8	ggaGUACCUUCCCAAGGGGUGa	gcaCAAGACCGGCUUCCCCACu
MIMAT0002807	hsa-miR-491-5p	NM_001079518	MED24	circRNA	chr17	38189450	38189459	-	1	0	AGO1-4	7mer-m8	ggaguaccuucccaAGGGGUGa	#NAME?
MIMAT0002807	hsa-miR-491-5p	NM_014815	MED24	circRNA	chr17	38189450	38189459	-	1	0	AGO1-4	7mer-m8	ggaguaccuucccaAGGGGUGa	#NAME?
MIMAT0002807	hsa-miR-491-5p	NM_007359	CASC3	circRNA	chr17	38325632	38325653	+	4	0	AGO1-4,AGO2	7mer-m8	ggaguaccUUCCCAAGGGGUGa	ugcagccaAAGCCCUCCCCACc
MIMAT0002807	hsa-miR-491-5p	NM_007359	CASC3	circRNA	chr17	38327219	38327239	+	5	0	AGO1-4,AGO2	7mer-m8	ggAGUACCUUCCCAAGGGGUGa	uaUCA-GCCAGCCUUCCCCACc
MIMAT0002807	hsa-miR-491-5p	NM_001552	IGFBP4	circRNA	chr17	38613825	38613846	+	14	0	AGO1-4,AGO2	8mer	ggaguaccuucccaAGGGGUGa	ccccuacaccucccUCCCCACa
MIMAT0002807	hsa-miR-491-5p	NM_002275	KRT15	circRNA	chr17	39670093	39670114	-	1	0	AGO1-4	7mer-m8	ggaguaccuucccaAGGGGUGa	ucccccucugccucUCCCCACc
MIMAT0002807	hsa-miR-491-5p	NM_002276	KRT19	circRNA	chr17	39815089	39815110	-	1	0	AGO1-4	7mer-m8	ggaguaccuucccaAGGGGUGa	ggcacacagcccccUCCCCACu
MIMAT0002807	hsa-miR-491-5p	NM_001144927	NKIRAS2	circRNA	chr17	40176797	40176818	+	1	0	AGO1-4	7mer-m8	ggaguaccUUCCCAAGGGGUGa	aaaaaaaaAAAAAUUCCCCACc
MIMAT0002807	hsa-miR-491-5p	NM_017595	NKIRAS2	circRNA	chr17	40176797	40176818	+	1	0	AGO1-4	7mer-m8	ggaguaccUUCCCAAGGGGUGa	aaaaaaaaAAAAAUUCCCCACc
MIMAT0002807	hsa-miR-491-5p	NM_001252039	RAB5C	circRNA	chr17	40282556	40282577	-	5	0	AGO1-4	7mer-m8	ggaGUACCUUCCCAAGGGGUGa	uugCAUAGCACCAGUCCCCACc
MIMAT0002807	hsa-miR-491-5p	NM_201434	RAB5C	circRNA	chr17	40282556	40282577	-	5	0	AGO1-4	7mer-m8	ggaGUACCUUCCCAAGGGGUGa	uugCAUAGCACCAGUCCCCACc
MIMAT0002807	hsa-miR-491-5p	NM_012232	PTRF	circRNA	chr17	40556367	40556388	-	7	0	AGO1-4	8mer	ggaguaccuucccaAGGGGUGa	uuccccucagccucUCCCCACa
MIMAT0002807	hsa-miR-491-5p	NM_012232	PTRF	circRNA	chr17	40556586	40556607	-	8	0	AGO1-4	8mer	ggaguaccuucccaAGGGGUGa	aaaacacgccccccUCCCCACa
MIMAT0002807	hsa-miR-491-5p	NM_025233	COASY	circRNA	chr17	40718178	40718206	+	3	0	AGO1-4,AGO2	7mer-m8	ggAGUACCUUC-C--CA----AGGGGUGa	guUCAUGGGGGAGCAGUCCCCUCCCCACu
MIMAT0002807	hsa-miR-491-5p	NM_170607	MLX	circRNA	chr17	40721236	40721257	+	2	0	AGO2	7mer-m8	ggaguaccuucccaAGGGGUGa	ccuucagaccaucgUCCCCACu
MIMAT0002807	hsa-miR-491-5p	hsa_circ_0000768	hsa_circ_000877	circRNA	chr17	40817905	40817926	+	2	0	AGO1-4	7mer-m8	ggaguaccuucccAAGGGGUGa	cagccuuucucucUUCCCCACu
MIMAT0002807	hsa-miR-491-5p	hsa_circ_0000769	hsa_circ_000878	circRNA	chr17	40817905	40817926	+	2	0	AGO1-4	7mer-m8	ggaguaccuucccAAGGGGUGa	cagccuuucucucUUCCCCACu
MIMAT0002807	hsa-miR-491-5p	NM_016437	TUBG2	circRNA	chr17	40818811	40818832	+	2	1	AGO1-4,AGO2	7mer-m8	ggaguaccuucccaAGGGGUGa	agcagugauuucccUCCCCACu
MIMAT0002807	hsa-miR-491-5p	NM_005854	RAMP2	circRNA	chr17	40914894	40914915	+	1	0	AGO1-4	7mer-m8	ggaguaccuucccAAGGGGUGa	cauguuacuccacUUCCCCACc
MIMAT0002807	hsa-miR-491-5p	NM_005854	RAMP2	circRNA	chr17	40914949	40914970	+	1	0	AGO1-4	7mer-m8	ggaguaccuucccaAGGGGUGa	uuuucucacucucaUCCCCACc
MIMAT0002807	hsa-miR-491-5p	NM_173079	RUNDC1	circRNA	chr17	41143871	41143892	+	2	0	AGO1-4,AGO2	7mer-m8	ggaguaccuucccAAGGGGUGa	ugcaaagucuguuUUCCCCACc
MIMAT0002807	hsa-miR-491-5p	NM_005533	IFI35	circRNA	chr17	41166322	41166343	+	1	0	AGO1-4	7mer-m8	ggaguaccuucccaAGGGGUGa	uccccuucucauccUCCCCACc
MIMAT0002807	hsa-miR-491-5p	NM_004941	DHX8	circRNA	chr17	41602153	41602174	+	2	0	AGO1-4	7mer-m8	ggaguaccuucccAAGGGGUGa	ucaaaaccucccuUUCCCCACu
MIMAT0002807	hsa-miR-491-5p	NM_005374	MPP2	circRNA	chr17	41954440	41954461	-	1	0	AGO1	8mer	ggaguaccuuccCAAGGGGUGa	caggucagcccuGCUCCCCACa
MIMAT0002807	hsa-miR-491-5p	NM_020218	ATXN7L3	circRNA	chr17	42269536	42269560	-	1	0	AGO1-4	7mer-m8	ggaGUACCU--UCC-CAAGGGGUGa	gaaCAGGGGCUAGGAGCUCCCCACu
MIMAT0002807	hsa-miR-491-5p	NM_004247	EFTUD2	circRNA	chr17	42930918	42930939	-	2	0	AGO1,AGO1-4	8mer	ggaguaccuucccaAGGGGUGa	cgggggccagaucaUCCCCACa
MIMAT0002807	hsa-miR-491-5p	NM_004247	EFTUD2	circRNA	chr17	42949900	42949921	-	1	0	AGO1-4	7mer-m8	ggaguaccuucccAAGGGGUGa	agaaccugauccuUUCCCCACu
MIMAT0002807	hsa-miR-491-5p	NM_024819	DCAKD	circRNA	chr17	43101163	43101188	-	1	1	AGO1-4	7mer-m8	ggAGUACCUUC---CCA-AGGGGUGa	ucUUCUGGGAGACCCCUCUCCCCACg
MIMAT0002807	hsa-miR-491-5p	hsa_circ_0044175	hsa_circ_0044175	circRNA	chr17	43514549	43514570	-	3	0	AGO1-4,AGO2	7mer-m8	ggaguaccuucccaAGGGGUGa	uguguccucuuuacUCCCCACc
MIMAT0002807	hsa-miR-491-5p	hsa_circ_0008067	hsa_circ_0008067	circRNA	chr17	43545881	43545904	-	1	0	AGO2	8mer	ggaGUACCU--UCCCAAGGGGUGa	agcCAAGAAACAGAGAUCCCCACa
MIMAT0002807	hsa-miR-491-5p	hsa_circ_0044175	hsa_circ_0044175	circRNA	chr17	43545881	43545904	-	1	0	AGO2	8mer	ggaGUACCU--UCCCAAGGGGUGa	agcCAAGAAACAGAGAUCCCCACa
MIMAT0002807	hsa-miR-491-5p	hsa_circ_0044176	hsa_circ_0044176	circRNA	chr17	43545881	43545904	-	1	0	AGO2	8mer	ggaGUACCU--UCCCAAGGGGUGa	agcCAAGAAACAGAGAUCCCCACa
MIMAT0002807	hsa-miR-491-5p	NM_030753	WNT3	circRNA	chr17	44172129	44172150	-	1	0	AGO1-4	7mer-m8	ggaguaccuucccaAGGGGUGa	aaguuaaauuccacUCCCCACc
MIMAT0002807	hsa-miR-491-5p	hsa_circ_0044187	hsa_circ_0044187	circRNA	chr17	44172129	44172150	-	1	0	AGO1-4	7mer-m8	ggaguaccuucccaAGGGGUGa	aaguuaaauuccacUCCCCACc
MIMAT0002807	hsa-miR-491-5p	hsa_circ_0044189	hsa_circ_0044189	circRNA	chr17	44172129	44172150	-	1	0	AGO1-4	7mer-m8	ggaguaccuucccaAGGGGUGa	aaguuaaauuccacUCCCCACc
MIMAT0002807	hsa-miR-491-5p	hsa_circ_0044190	hsa_circ_0044190	circRNA	chr17	44172129	44172150	-	1	0	AGO1-4	7mer-m8	ggaguaccuucccaAGGGGUGa	aaguuaaauuccacUCCCCACc
MIMAT0002807	hsa-miR-491-5p	hsa_circ_0044191	hsa_circ_0044191	circRNA	chr17	44172129	44172150	-	1	0	AGO1-4	7mer-m8	ggaguaccuucccaAGGGGUGa	aaguuaaauuccacUCCCCACc
MIMAT0002807	hsa-miR-491-5p	NM_030753	WNT3	circRNA	chr17	44188173	44188194	-	2	0	AGO1-4	7mer-m8	ggaguaccuucccAAGGGGUGa	ugcuugaccugcuUUCCCCACc
MIMAT0002807	hsa-miR-491-5p	hsa_circ_0044187	hsa_circ_0044187	circRNA	chr17	44188173	44188194	-	2	0	AGO1-4	7mer-m8	ggaguaccuucccAAGGGGUGa	ugcuugaccugcuUUCCCCACc
MIMAT0002807	hsa-miR-491-5p	hsa_circ_0044189	hsa_circ_0044189	circRNA	chr17	44188173	44188194	-	2	0	AGO1-4	7mer-m8	ggaguaccuucccAAGGGGUGa	ugcuugaccugcuUUCCCCACc
MIMAT0002807	hsa-miR-491-5p	hsa_circ_0044190	hsa_circ_0044190	circRNA	chr17	44188173	44188194	-	2	0	AGO1-4	7mer-m8	ggaguaccuucccAAGGGGUGa	ugcuugaccugcuUUCCCCACc
MIMAT0002807	hsa-miR-491-5p	hsa_circ_0044191	hsa_circ_0044191	circRNA	chr17	44188173	44188194	-	2	0	AGO1-4	7mer-m8	ggaguaccuucccAAGGGGUGa	ugcuugaccugcuUUCCCCACc
MIMAT0002807	hsa-miR-491-5p	NM_030753	WNT3	circRNA	chr17	44230595	44230616	-	3	0	AGO1-4	8mer	ggaguaccuucccAAGGGGUGa	cuaagccugaucuUUCCCCACa
MIMAT0002807	hsa-miR-491-5p	hsa_circ_0044187	hsa_circ_0044187	circRNA	chr17	44230595	44230616	-	3	0	AGO1-4	8mer	ggaguaccuucccAAGGGGUGa	cuaagccugaucuUUCCCCACa
MIMAT0002807	hsa-miR-491-5p	hsa_circ_0044189	hsa_circ_0044189	circRNA	chr17	44230595	44230616	-	3	0	AGO1-4	8mer	ggaguaccuucccAAGGGGUGa	cuaagccugaucuUUCCCCACa
MIMAT0002807	hsa-miR-491-5p	hsa_circ_0044190	hsa_circ_0044190	circRNA	chr17	44230595	44230616	-	3	0	AGO1-4	8mer	ggaguaccuucccAAGGGGUGa	cuaagccugaucuUUCCCCACa
MIMAT0002807	hsa-miR-491-5p	hsa_circ_0044191	hsa_circ_0044191	circRNA	chr17	44230595	44230616	-	3	0	AGO1-4	8mer	ggaguaccuucccAAGGGGUGa	cuaagccugaucuUUCCCCACa
MIMAT0002807	hsa-miR-491-5p	NM_030753	WNT3	circRNA	chr17	44246554	44246574	-	4	0	AGO2	7mer-m8	ggAGUACCUUCCCAAGGGGUGa	auUCAUGGCA-UUAUCCCCACu
MIMAT0002807	hsa-miR-491-5p	hsa_circ_0044187	hsa_circ_0044187	circRNA	chr17	44246554	44246574	-	4	0	AGO2	7mer-m8	ggAGUACCUUCCCAAGGGGUGa	auUCAUGGCA-UUAUCCCCACu
MIMAT0002807	hsa-miR-491-5p	hsa_circ_0044189	hsa_circ_0044189	circRNA	chr17	44246554	44246574	-	4	0	AGO2	7mer-m8	ggAGUACCUUCCCAAGGGGUGa	auUCAUGGCA-UUAUCCCCACu
MIMAT0002807	hsa-miR-491-5p	hsa_circ_0044190	hsa_circ_0044190	circRNA	chr17	44246554	44246574	-	4	0	AGO2	7mer-m8	ggAGUACCUUCCCAAGGGGUGa	auUCAUGGCA-UUAUCCCCACu
MIMAT0002807	hsa-miR-491-5p	hsa_circ_0044191	hsa_circ_0044191	circRNA	chr17	44246554	44246574	-	4	0	AGO2	7mer-m8	ggAGUACCUUCCCAAGGGGUGa	auUCAUGGCA-UUAUCCCCACu
MIMAT0002807	hsa-miR-491-5p	NM_030753	WNT3	circRNA	chr17	44271423	44271444	-	1	0	AGO1-4	7mer-m8	ggaguaccuucccaAGGGGUGa	gacuacgugcacccUCCCCACc
MIMAT0002807	hsa-miR-491-5p	hsa_circ_0044187	hsa_circ_0044187	circRNA	chr17	44271423	44271444	-	1	0	AGO1-4	7mer-m8	ggaguaccuucccaAGGGGUGa	gacuacgugcacccUCCCCACc
MIMAT0002807	hsa-miR-491-5p	hsa_circ_0044191	hsa_circ_0044191	circRNA	chr17	44271423	44271444	-	1	0	AGO1-4	7mer-m8	ggaguaccuucccaAGGGGUGa	gacuacgugcacccUCCCCACc
MIMAT0002807	hsa-miR-491-5p	NM_001114091	CDC27	circRNA	chr17	45197499	45197520	-	1	0	AGO2	7mer-m8	ggAGUACCUUCCCAAGGGGUGa	gaUGAUAGAGUGGUUCCCCACu
MIMAT0002807	hsa-miR-491-5p	NM_003110	SP2	circRNA	chr17	45994415	45994436	+	1	0	AGO1-4	7mer-m8	ggaguaccuucccaAGGGGUGa	ggcaucugccacccUCCCCACu
MIMAT0002807	hsa-miR-491-5p	NM_018129	PNPO	circRNA	chr17	46025664	46025685	+	1	0	AGO1-4	7mer-m8	ggaguaccuucccaAGGGGUGa	ucugcuuuucuuacUCCCCACc
MIMAT0002807	hsa-miR-491-5p	NM_006546	IGF2BP1	circRNA	chr17	47127538	47127557	+	7	0	AGO2	7mer-m8	ggaguACCUUCCCAAGGGGUGa	acaacUGAAA--UUUCCCCACu
MIMAT0002807	hsa-miR-491-5p	NM_006546	IGF2BP1	circRNA	chr17	47127555	47127576	+	2	0	AGO2	7mer-m8	ggAGUACCUUCCC-AAGGGGUGa	acUC-UGUUGGGGCUUCCCCACc
MIMAT0002807	hsa-miR-491-5p	NM_006546	IGF2BP1	circRNA	chr17	47131897	47131914	+	3	0	AGO1,AGO2	7mer-m8	ggaGUACCUUCCCAAGGGGUGa	ggcCAUG--AGG--UCCCCACu
MIMAT0002807	hsa-miR-491-5p	NM_006546	IGF2BP1	circRNA	chr17	47132302	47132323	+	2	0	AGO2	7mer-m8	ggaguaccuucccaAGGGGUGa	gcgaucccagccccUCCCCACc
MIMAT0002807	hsa-miR-491-5p	NM_030802	FAM117A	circRNA	chr17	47788690	47788711	-	1	0	AGO2	7mer-m8	ggaGUACCUUCCCAAGGGGUGa	aagCCUCCAAGGCCUCCCCACu
MIMAT0002807	hsa-miR-491-5p	NM_002204	ITGA3	circRNA	chr17	48156806	48156827	+	1	0	AGO1-4	8mer	ggaguaccuucccaAGGGGUGa	gggacaggccaucaUCCCCACa
MIMAT0002807	hsa-miR-491-5p	NM_032595	PPP1R9B	circRNA	chr17	48211361	48211382	-	15	0	AGO1,AGO1-4,AGO2	7mer-m8	ggaguaccuucccaAGGGGUGa	aucaguauuucuugUCCCCACc
MIMAT0002807	hsa-miR-491-5p	NM_032595	PPP1R9B	circRNA	chr17	48211574	48211595	-	2	0	AGO1-4,AGO2	7mer-m8	ggaguaccuucCCAAGGGGUGa	aaaucgacucuGUUUCCCCACu
MIMAT0002807	hsa-miR-491-5p	NM_018346	RSAD1	circRNA	chr17	48557272	48557293	+	1	0	AGO1-4	8mer	ggaguaccuucccaAGGGGUGa	cccagucuagccagUCCCCACa
MIMAT0002807	hsa-miR-491-5p	NM_001242903	AKAP1	circRNA	chr17	55191958	55191978	+	2	0	AGO1-4,AGO2	7mer-m8	ggAGUACCUUCCCAAGGGGUGa	ucUCA-GCCUGGAAUCCCCACc
MIMAT0002807	hsa-miR-491-5p	NM_003488	AKAP1	circRNA	chr17	55191958	55191978	+	2	0	AGO1-4,AGO2	7mer-m8	ggAGUACCUUCCCAAGGGGUGa	ucUCA-GCCUGGAAUCCCCACc
MIMAT0002807	hsa-miR-491-5p	NM_007146	VEZF1	circRNA	chr17	56051996	56052017	-	15	0	AGO1-4,AGO2	7mer-m8	ggaguaccuucccaAGGGGUGa	uaccccagucaaccUCCCCACc
MIMAT0002807	hsa-miR-491-5p	NM_005994	TBX2	circRNA	chr17	59486339	59486359	+	3	0	AGO1-4	7mer-m8	ggaGUACCUUCCCAAGGGGUGa	gaaCCUGUUA-GUCUCCCCACc
MIMAT0002807	hsa-miR-491-5p	NR_026641	INTS2	circRNA	chr17	59943766	59943787	-	7	0	AGO1-4,AGO2	7mer-m8	ggaguaccuucccAAGGGGUGa	cucaaucacacacUUCCCCACc
MIMAT0002807	hsa-miR-491-5p	NM_005121	MED13	circRNA	chr17	60040299	60040320	-	1	0	AGO1-4	8mer	ggaguacCUUCCCAAGGGGUGa	ggauaaaGUGGGAAUCCCCACa
MIMAT0002807	hsa-miR-491-5p	NM_005121	MED13	circRNA	chr17	60045582	60045603	-	5	0	AGO1-4,AGO2	8mer	ggaguaccuucccaAGGGGUGa	agaaccacugccaaUCCCCACa
MIMAT0002807	hsa-miR-491-5p	NM_025185	TANC2	circRNA	chr17	61498211	61498233	+	3	0	AGO1-4	8mer	ggAGUACCU-UCCCAAGGGGUGa	auUCAAGCACCGUCAUCCCCACa
MIMAT0002807	hsa-miR-491-5p	NM_005828	DCAF7	circRNA	chr17	61670398	61670419	+	4	0	AGO1-4,AGO2	7mer-m8	ggaguaccuucccAAGGGGUGa	cugucccucugccUUCCCCACu
MIMAT0002807	hsa-miR-491-5p	NM_005828	DCAF7	circRNA	chr17	61671108	61671129	+	20	0	AGO1,AGO1-4,AGO2	7mer-m8	ggaguaccuucccAAGGGGUGa	ucagugaccuuccUUCCCCACc
MIMAT0002807	hsa-miR-491-5p	NM_017647	FTSJ3	circRNA	chr17	61896829	61896850	-	3	0	AGO1-4	7mer-m8	ggaGUACCUUCCCAAGGGGUGa	ggcCACUUAAGCCCUCCCCACc
MIMAT0002807	hsa-miR-491-5p	NM_018469	TEX2	circRNA	chr17	62290775	62290796	-	15	0	AGO1,AGO1-4,AGO2,AGO3	7mer-m8	ggaguaccuucccAAGGGGUGa	aaacugcaccuucUUCCCCACu
MIMAT0002807	hsa-miR-491-5p	NM_018469	TEX2	circRNA	chr17	62290961	62290982	-	2	0	AGO1-4,AGO2	8mer	ggaguaccUUCCCAAGGGGUGa	uggagccaAAAGAAUCCCCACa
MIMAT0002807	hsa-miR-491-5p	NM_002737	PRKCA	circRNA	chr17	64622100	64622121	+	1	0	AGO1-4	7mer-m8	ggaGUACCUUCCCAAGGGGUGa	uuaUGUGGCCUCAUUCCCCACc
MIMAT0002807	hsa-miR-491-5p	NM_002737	PRKCA	circRNA	chr17	64804155	64804176	+	1	0	AGO2	7mer-m8	ggaguaccuucccaAGGGGUGa	aaaugcuaacaacaUCCCCACc
MIMAT0002807	hsa-miR-491-5p	NM_002737	PRKCA	circRNA	chr17	64804186	64804207	+	1	0	AGO2	7mer-m8	ggaguaccuucccaAGGGGUGa	aagccccuuuccccUCCCCACc
MIMAT0002807	hsa-miR-491-5p	NM_014877	HELZ	circRNA	chr17	65105670	65105691	-	1	0	AGO1-4	7mer-m8	ggaguaccuuccCAAGGGGUGa	cuuccccuuccuGCUCCCCACg
MIMAT0002807	hsa-miR-491-5p	NM_212472	PRKAR1A	circRNA	chr17	66511378	66511399	+	2	0	AGO1-4,AGO2	7mer-m8	ggaguaccuucccaAGGGGUGa	auuuuauucccuagUCCCCACu
MIMAT0002807	hsa-miR-491-5p	NM_015353	KCTD2	circRNA	chr17	73059286	73059308	+	4	0	AGO1-4,AGO2	7mer-m8	ggAGUACCUU-CCCAAGGGGUGa	acUAAAGGAACUCCCUCCCCACc
MIMAT0002807	hsa-miR-491-5p	NR_033345	GGA3	circRNA	chr17	73233975	73233995	-	1	0	AGO2	8mer	ggAGUACCUUCCCAAGGGGUGa	ugUCAUGG-GUCAUUCCCCACa
MIMAT0002807	hsa-miR-491-5p	NR_033345	GGA3	circRNA	chr17	73235607	73235628	-	2	0	AGO1,AGO1-4	7mer-m8	ggaguaccuucccaAGGGGUGa	uaccuccccucucaUCCCCACc
MIMAT0002807	hsa-miR-491-5p	NM_000154	GALK1	circRNA	chr17	73754308	73754329	-	1	0	AGO1-4	7mer-m8	ggaguaccuuccCAAGGGGUGa	gaggccuccgcuGCUCCCCACg
MIMAT0002807	hsa-miR-491-5p	NM_001080419	UNK	circRNA	chr17	73813441	73813462	+	1	0	AGO2	7mer-m8	ggaguaccuucCCAAGGGGUGa	cuaaccucugcGGCUCCCCACc
MIMAT0002807	hsa-miR-491-5p	NM_001185039	ACOX1	circRNA	chr17	73944345	73944366	-	4	0	AGO1-4,AGO2	7mer-m8	ggaguaccUUCCCAAGGGGUGa	agugggcuAAGAACUCCCCACu
MIMAT0002807	hsa-miR-491-5p	NM_001145297	EXOC7	circRNA	chr17	74079551	74079572	-	2	0	AGO2	8mer	ggaguaccuucccAAGGGGUGa	uggcuccugcuuuUUCCCCACa
MIMAT0002807	hsa-miR-491-5p	NM_182565	FAM100B	circRNA	chr17	74266387	74266408	+	3	0	AGO1-4	7mer-m8	ggaguaccuuccCAAGGGGUGa	cagccgcagccuGCUCCCCACc
MIMAT0002807	hsa-miR-491-5p	NM_182565	FAM100B	circRNA	chr17	74267092	74267112	+	1	1	AGO2	7mer-m8	ggaGUACCUUCCCAAGGGGUGa	cccCAUGG-CCUCUUCCCCACc
MIMAT0002807	hsa-miR-491-5p	NM_003016	SRSF2	circRNA	chr17	74733337	74733357	-	9	0	AGO1-4,AGO2	7mer-m8	ggaguaccuUCCCAAGGGGUGa	gccuuucccAGUG-UCCCCACg
MIMAT0002807	hsa-miR-491-5p	NM_001142640	TNRC6C	circRNA	chr17	76089766	76089786	+	5	0	AGO1-4,AGO2	7mer-m8	ggAGUACCUUCCCAAGGGGUGa	acUCCUGGCAGUG-UCCCCACu
MIMAT0002807	hsa-miR-491-5p	NM_024419	PGS1	circRNA	chr17	76388598	76388619	+	1	0	AGO1	7mer-m8	ggaguaccuucccaAGGGGUGa	uuccccaggucaccUCCCCACc
MIMAT0002807	hsa-miR-491-5p	NM_025090	USP36	circRNA	chr17	76799753	76799774	-	3	0	AGO1-4,AGO2	7mer-m8	ggaguaccuucCCAAGGGGUGa	gaggccacugcGGCUCCCCACg
MIMAT0002807	hsa-miR-491-5p	NM_025090	USP36	circRNA	chr17	76808952	76808977	-	1	0	AGO1-4	7mer-m8	ggagUACCUUCCCA----AGGGGUGa	ggcaAUGGGAUUAUUUCCUCCCCACu
MIMAT0002807	hsa-miR-491-5p	NM_025090	USP36	circRNA	chr17	76831516	76831539	-	1	0	AGO1-4	7mer-m8	ggaGUACCUUCCC---AAGGGGUGa	ccgCA-GAAAGUGCUUUUCCCCACg
MIMAT0002807	hsa-miR-491-5p	NM_005567	LGALS3BP	circRNA	chr17	76967961	76967982	-	9	0	AGO1,AGO1-4,AGO2,AGO3	7mer-m8	ggaguaccuucccaAGGGGUGa	gucccuggucuaccUCCCCACc
MIMAT0002807	hsa-miR-491-5p	hsa_circ_0000810	hsa_circ_000240	circRNA	chr17	76967961	76967982	-	9	0	AGO1,AGO1-4,AGO2,AGO3	7mer-m8	ggaguaccuucccaAGGGGUGa	gucccuggucuaccUCCCCACc
MIMAT0002807	hsa-miR-491-5p	NM_005567	LGALS3BP	circRNA	chr17	76968513	76968535	-	6	0	AGO1-4,AGO2	8mer	ggaGUACCUUCCCA-AGGGGUGa	aggCCUGGCCCAGUGUCCCCACa
MIMAT0002807	hsa-miR-491-5p	NM_001159772	CANT1	circRNA	chr17	76988433	76988457	-	5	0	AGO1-4,AGO2	8mer	ggAGUACCU-UCCC--AAGGGGUGa	caUCAUUCACAGUGCCCUCCCCACa
MIMAT0002807	hsa-miR-491-5p	NM_138793	CANT1	circRNA	chr17	76988433	76988457	-	5	0	AGO1-4,AGO2	8mer	ggAGUACCU-UCCC--AAGGGGUGa	caUCAUUCACAGUGCCCUCCCCACa
MIMAT0002807	hsa-miR-491-5p	NM_001159772	CANT1	circRNA	chr17	76989815	76989836	-	3	0	AGO1-4	7mer-m8	ggAGUACCUUCCCAAGGGGUGa	cgUCGGGGCGGUGGUCCCCACu
MIMAT0002807	hsa-miR-491-5p	NM_138793	CANT1	circRNA	chr17	76989815	76989836	-	3	0	AGO1-4	7mer-m8	ggAGUACCUUCCCAAGGGGUGa	cgUCGGGGCGGUGGUCCCCACu
MIMAT0002807	hsa-miR-491-5p	NM_001042573	ENGASE	circRNA	chr17	77082672	77082693	+	2	0	AGO2	7mer-m8	ggaguaccuucccaAGGGGUGa	uucugccuugucccUCCCCACg
MIMAT0002807	hsa-miR-491-5p	NM_020761	RPTOR	circRNA	chr17	78938935	78938962	+	1	0	AGO1-4	8mer	ggaguacCUUCCC------AAGGGGUGa	ucccuccGAAGGGCUGCUCUUCCCCACa
MIMAT0002807	hsa-miR-491-5p	NM_001037984	SLC38A10	circRNA	chr17	79268833	79268854	-	2	0	AGO2	7mer-m8	ggaguaccuucccaAGGGGUGa	ggcugcccauccccUCCCCACc
MIMAT0002807	hsa-miR-491-5p	NM_017921	NPLOC4	circRNA	chr17	79532025	79532045	-	1	0	AGO1-4	7mer-m8	ggAGUACCUUCCCAAGGGGUGa	ggUCCU-GAACGAUUCCCCACu
MIMAT0002807	hsa-miR-491-5p	NM_002949	MRPL12	circRNA	chr17	79677837	79677858	+	1	0	AGO1-4	7mer-m8	ggaguaccuucCCAAGGGGUGa	caccuccacccGCUUCCCCACc
MIMAT0002807	hsa-miR-491-5p	NM_000918	P4HB	circRNA	chr17	79803470	79803491	-	11	0	AGO1,AGO1-4,AGO2	8mer	ggagUACCUUCCCAAGGGGUGa	caaaGUGCACAGCUUCCCCACa
MIMAT0002807	hsa-miR-491-5p	NR_033683	PCYT2	circRNA	chr17	79867169	79867190	-	1	0	AGO2	7mer-m8	ggaguaccuuccCAAGGGGUGa	gaaggggcaccuGCUCCCCACc
MIMAT0002807	hsa-miR-491-5p	NM_016538	SIRT7	circRNA	chr17	79872771	79872792	-	1	0	AGO1-4	7mer-m8	ggaguaccuucccaAGGGGUGa	ggaaggacagccccUCCCCACc
MIMAT0002807	hsa-miR-491-5p	NM_032711	MAFG	circRNA	chr17	79880370	79880391	-	3	0	AGO1-4,AGO2	7mer-m8	ggaguaccuucccAAGGGGUGa	uuuccucccucucUUCCCCACc
MIMAT0002807	hsa-miR-491-5p	NM_004127	GPS1	circRNA	chr17	80015026	80015047	+	2	0	AGO1-4,AGO2	7mer-m8	ggaguaccuucccaAGGGGUGa	acaucugcacccccUCCCCACc
MIMAT0002807	hsa-miR-491-5p	NM_212492	GPS1	circRNA	chr17	80015026	80015047	+	2	0	AGO1-4,AGO2	7mer-m8	ggaguaccuucccaAGGGGUGa	acaucugcacccccUCCCCACc
MIMAT0002807	hsa-miR-491-5p	NM_004104	FASN	circRNA	chr17	80036973	80036994	-	5	1	AGO1-4,AGO2	7mer-m8	ggaguaccuucccaAGGGGUGa	aggucacuccaccaUCCCCACc
MIMAT0002807	hsa-miR-491-5p	NM_004104	FASN	circRNA	chr17	80038590	80038611	-	5	6	AGO1-4,AGO2	7mer-m8	ggaguaccuucccaAGGGGUGa	cucccggcucagcaUCCCCACc
MIMAT0002807	hsa-miR-491-5p	NM_004104	FASN	circRNA	chr17	80044986	80045007	-	5	0	AGO1,AGO1-4,AGO2	8mer	ggaguaccuucccaAGGGGUGa	aaguuuugcuucacUCCCCACa
MIMAT0002807	hsa-miR-491-5p	NM_004104	FASN	circRNA	chr17	80046361	80046382	-	3	0	AGO1-4	7mer-m8	ggaguaccuucccaAGGGGUGa	gaacuccccucaucUCCCCACu
[truncated: 424 more rows]
